# Supplementary material for: Multifunctional chiral phosphines-catalyzed highly diastereoselective and enantioselective substitution of Morita–Baylis–Hillman adducts with oxazolones
Source: Royal Society of Chemistry journal article supplement (doi:10.1039/c1ob00017a), 2011-01-01
Supplement: c1ob00017a.pdf [file c1ob00017a.pdf]

## Supporting Information

### Multifunctional Chiral Phosphines-Catalyzed Highly Diastereoselective and Enantioselective Substitution of Morita-Baylis-Hillman Adducts with Oxazolones

Yuan-Liang Yang<sup>a</sup>, Cheng-Kui Pei<sup>a</sup>, and Min Shi<sup>a,b\*</sup>

<sup>a</sup>*School of Chemistry & Molecular Engineering, East China University of Science and Technology,  
130 Mei Long Road, Shanghai 200237 China, Fax: 86-21-64166128.*

<sup>b</sup>*State Key Laboratory of Organometallic Chemistry,  
Shanghai Institute of Organic Chemistry, Chinese Academy of Sciences,  
354 Fenglin Road, Shanghai 200032 China. [Mshi@mail.sioc.ac.cn](mailto:Mshi@mail.sioc.ac.cn).*

#### CONTENTS

|                                                                                                     |      |
|-----------------------------------------------------------------------------------------------------|------|
| 1. General Remarks and Procedure for the Preparation of Catalysts.....                              | S2   |
| 2. Reference.....                                                                                   | S17  |
| 3. General Procedure and Spectroscopic Data of the Boc-protected Morita-Baylis-Hillman adducts..... | S18  |
| 4. General Procedure and Spectroscopic Data of the Products <b>3</b> .....                          | S29  |
| 5. Conversion of <b>3j</b> and <b>3b</b> to the Corresponding Amino Acid Derivatives.....           | S60  |
| 6. HPLC Spectra.....                                                                                | S63  |
| 7. X-ray Structure of <b>3b</b> .....                                                               | S101 |

**General Remarks:**  $^1\text{H}$  NMR spectra were recorded on a Bruker AM-300 or AM-400 spectrometer for solution in  $\text{CDCl}_3$  with tetramethylsilane (TMS) as internal standard; J-values are in Hz. Mass spectra were recorded with a HP-5989 instrument. All of the compounds reported in this paper gave satisfactory HRMS analytic data. Melting points were determined on a digital melting point apparatus and temperatures were uncorrected. Optical rotations were determined at 589 nm (sodium D line) by using a Perkin-Elmer-341 MC digital polarimeter;  $[\alpha]_{\text{D}}$ -values are given in unit of  $10 \text{ deg}^{-1} \text{ cm}^2 \text{ g}^{-1}$ . Infrared spectra were recorded on a Perkin-Elmer PE-983 spectrometer with absorption in  $\text{cm}^{-1}$ . Chiral HPLC was performed on a SHIMADZU SPD-10A vp series with chiral columns (Chiralpak AD-H, IC-H columns  $4.6 \times 250 \text{ mm}$ , (Daicel Chemical Ind., Ltd.)). THF, toluene and  $\text{Et}_2\text{O}$  were distilled from sodium (Na) under argon (Ar) atmosphere.  $\text{CH}_3\text{CN}$ , 1,2-dichloroethane and dichloromethane were distilled from  $\text{CaH}_2$  under argon (Ar) atmosphere. Commercially obtained reagents were used without further purification. All reactions were monitored by TLC with Huanghai GF254 silica gel coated plates. Flash column chromatography was carried out using 300-400 mesh silica gel at increased pressure. All the oxazolones were prepared according to the literature.<sup>[1]</sup>

**Reaction Procedure for the Preparation of Catalysts:** Reaction procedure for the preparation of (*R*)-1-argio-3-(2'-(diargiophosphino)-1,1'-binaphthyl-2-yl)thiourea.

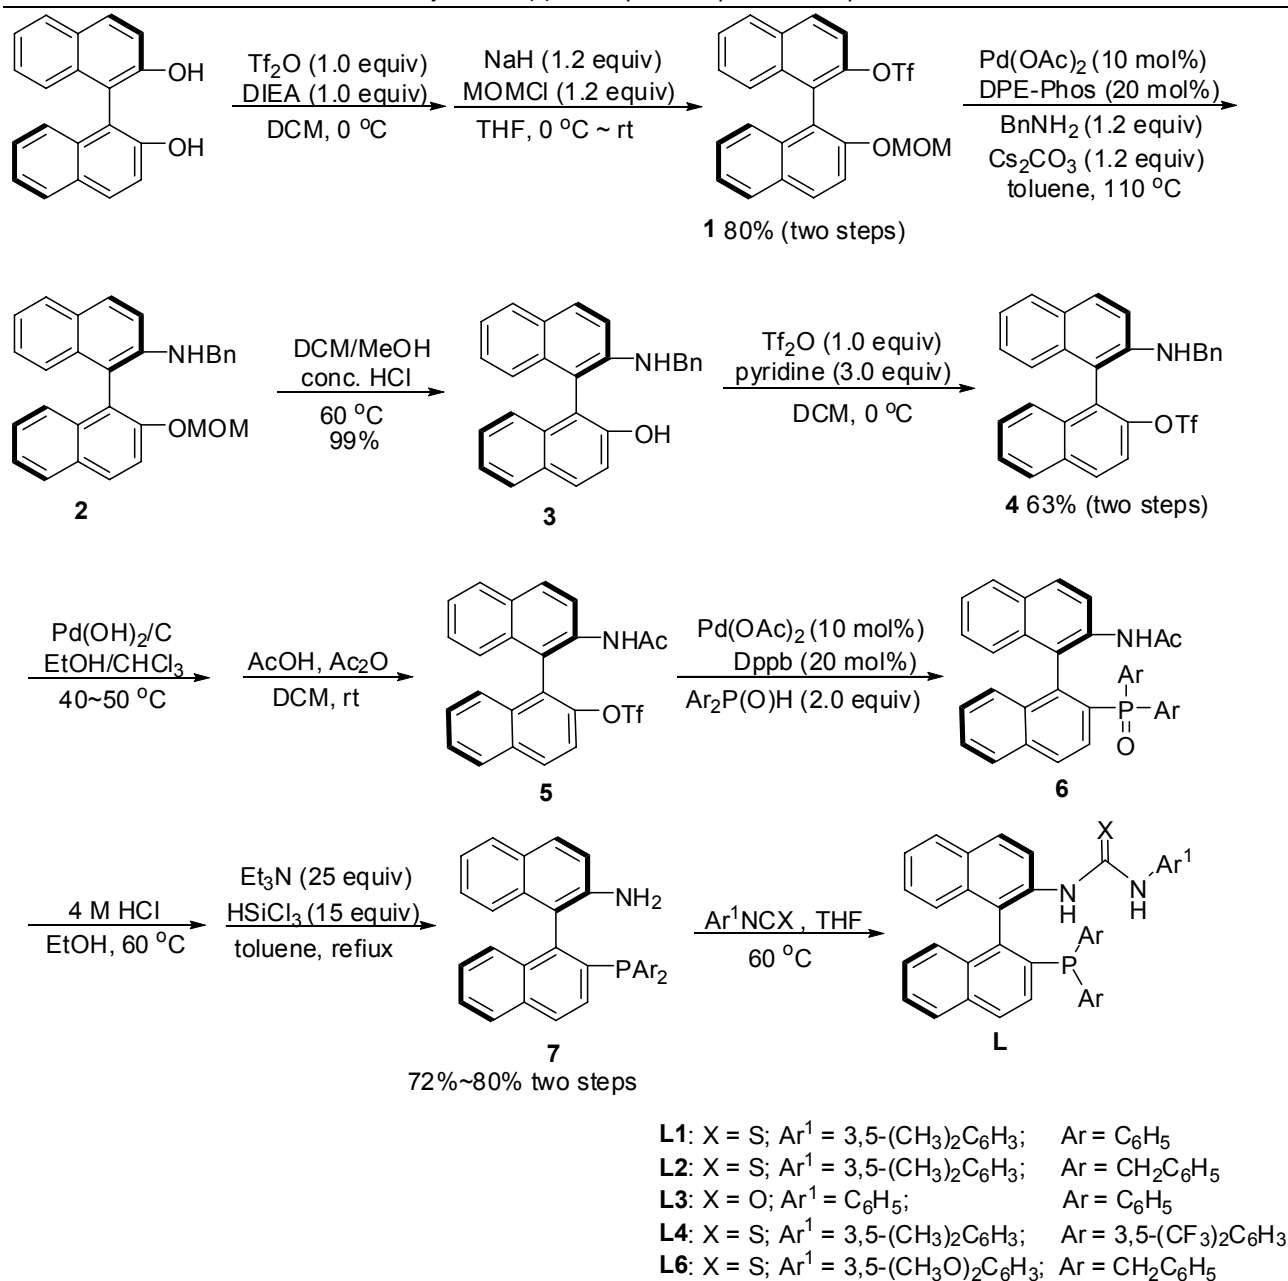

**Compound 1:** This is a known compound.<sup>[2]</sup>  $[\alpha]_D^{20} = -33.0$  (c 1.0, CHCl<sub>3</sub>). <sup>1</sup>H NMR (400 MHz, CDCl<sub>3</sub>, TMS):  $\delta$  7.97-8.06 (3H, m, Ar-H), 7.89 (1H, d,  $J = 8.0$  Hz, Ar-H), 7.63 (1H, d,  $J = 8.8$  Hz, Ar-H), 7.58-7.52 (2H, m, Ar-H), 7.38-7.34 (3H, m, Ar-H), 7.26-7.24 (1H, m, Ar-H), 7.03 (1H, d,  $J = 8.8$  Hz, Ar-H), 5.18 (1H, d,  $J = 6.8$  Hz, ArOCH<sub>2</sub>), 5.03 (1H, d,  $J = 6.8$  Hz, ArOCH<sub>2</sub>), 3.22 (3H, s, OCH<sub>3</sub>); <sup>19</sup>F NMR (376 MHz, CDCl<sub>3</sub>, CFC<sub>3</sub>):  $\delta$  -74.9.

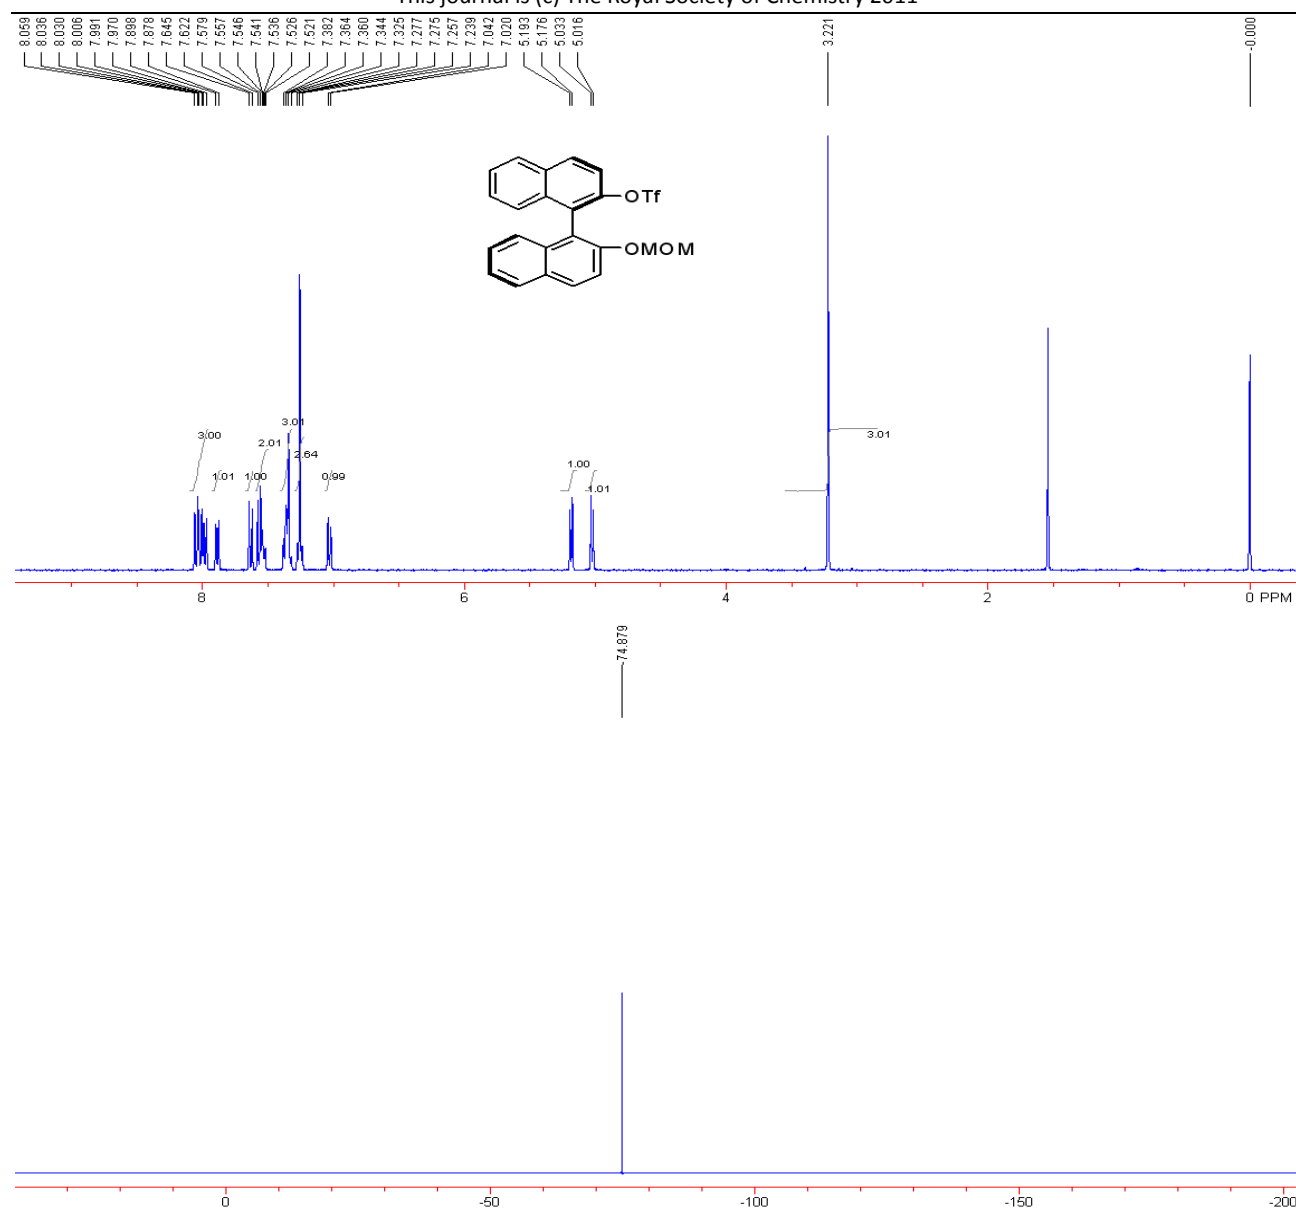

**Compound 2:** This is a known compound.<sup>[2]</sup>  $[\alpha]_D^{20} = +109.9$  (c 1.0,  $\text{CHCl}_3$ ).  $^1\text{H}$  NMR (400 MHz,  $\text{CDCl}_3$ , TMS):  $\delta$  7.95 (1H, d,  $J = 9.2$  Hz, Ar-H), 7.86 (1H, d,  $J = 8.0$  Hz, Ar-H), 7.76 (1H, d,  $J = 9.2$  Hz, Ar-H), 7.72 (1H, d,  $J = 9.6$  Hz, Ar-H), 7.59 (1H, d,  $J = 8.8$  Hz, Ar-H), 7.38-7.34 (1H, m, Ar-H), 7.24 (2H, d,  $J = 3.6$  Hz, Ar-H), 7.20-7.08 (8H, m, Ar-H), 6.95-6.93 (1H, m, Ar-H), 5.05 (1H, d,  $J = 6.8$  Hz,  $\text{ArOCH}_2$ ), 5.00 (1H, d,  $J = 6.8$  Hz,  $\text{ArOCH}_2$ ), 4.37 (2H, d,  $J = 3.2$  Hz  $\text{CH}_2\text{Ph}$ ), 4.04 (1H, brs, ArNH), 3.15 (3H, s,  $\text{OCH}_3$ );  $^{13}\text{C}$  NMR (100 MHz,  $\text{CDCl}_3$ , TMS):  $\delta$  153.3, 143.5, 139.8, 134.0, 133.7, 130.3, 129.9, 129.0, 128.3, 128.0, 127.9, 127.3, 126.8, 126.2, 125.4, 124.5, 124.0, 121.6, 120.6, 117.6, 113.9, 113.3, 95.0, 55.9, 47.6.

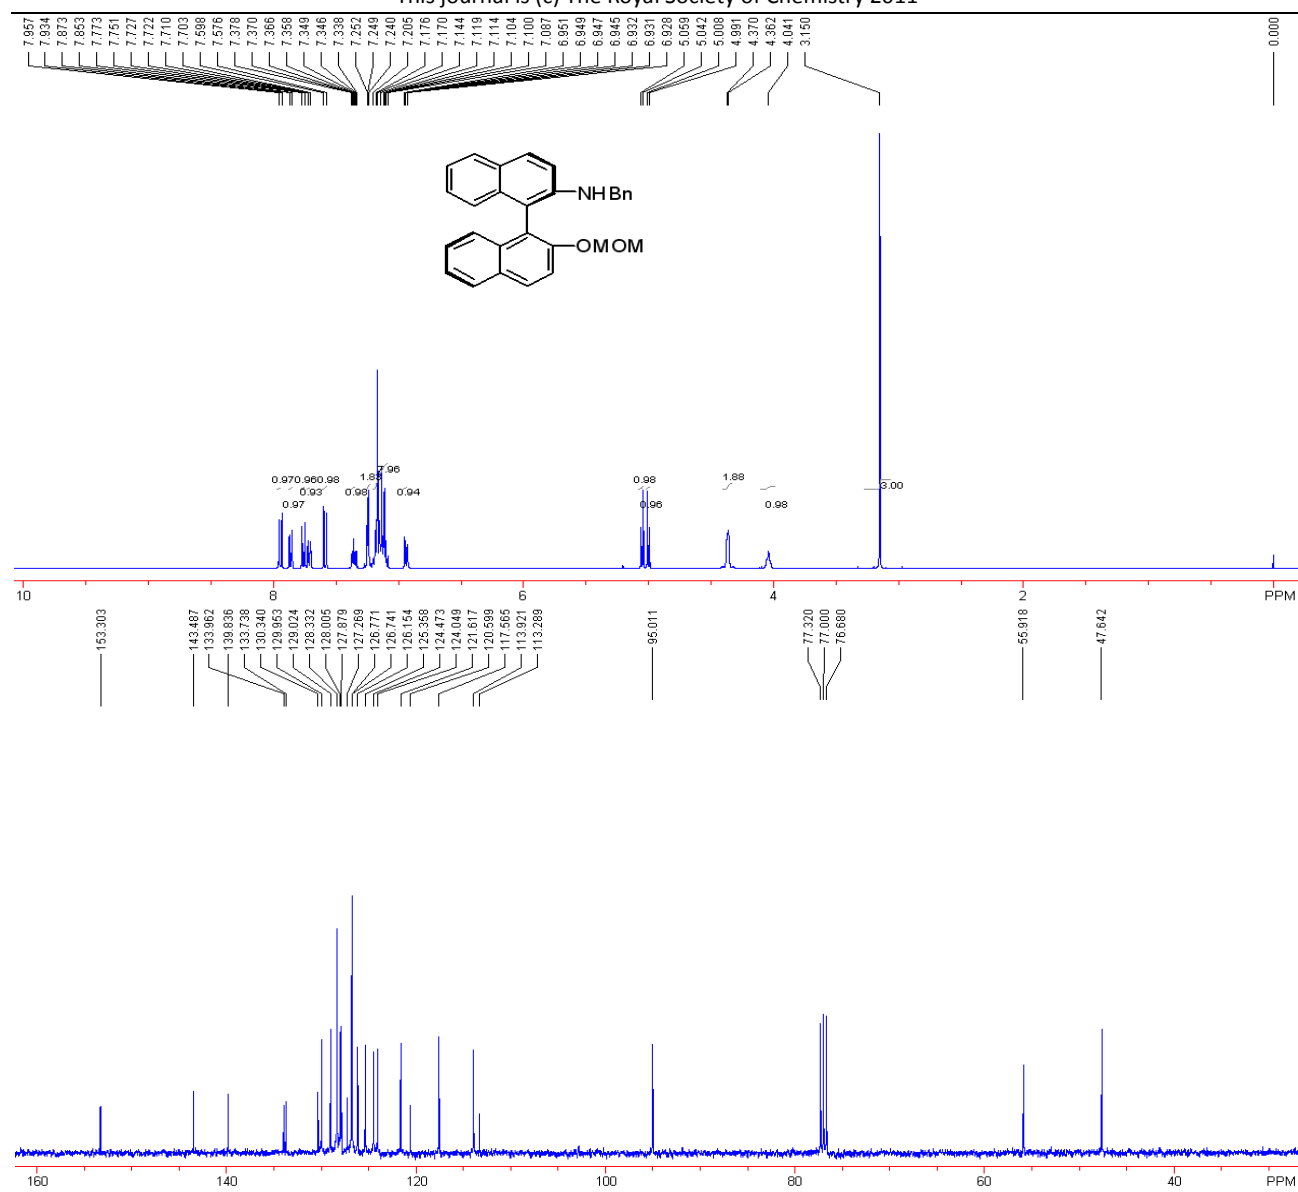

**Compound 3: (R)-2'-(benzylamino)-1,1'-binaphthyl-2-ol**

Compound **2** (1.79 g, 4.28 mmol) was dissolved into the mixed solvent of DCM/MeOH (15 mL/15 mL), and then 1.5 mL conc. HCl was added into the solution at room temperature. Then, the mixture was stirred for 8 hours at 60 °C. After being cooled to room temperature, the solution was poured into water and quenched by addition of saturated NaHCO<sub>3</sub> solution, extracted with CH<sub>2</sub>Cl<sub>2</sub> twice, the combined organic layers were washed with brine, dried over anhydrous Na<sub>2</sub>SO<sub>4</sub>. The solvent was removed under reduced pressure and residue was used for the next reaction without further purification, affording product **3** as white solid (1.60 g, 99% yield). m.p. 133-135 °C; [ $\alpha$ ]<sub>D</sub><sup>20</sup> = +103.4 (c 1.0, CHCl<sub>3</sub>). IR (CH<sub>2</sub>Cl<sub>2</sub>)  $\nu$  3418, 3071, 3051, 3017, 1699, 1616, 1596, 1495, 1427, 1339, 1295, 1178, 1144, 972, 812, 747 cm<sup>-1</sup>; <sup>1</sup>H NMR (400 MHz, CDCl<sub>3</sub>, TMS):  $\delta$  7.93 (1H, d, *J* = 8.8 Hz, Ar-H), 7.87 (1H, d, *J* = 8.0 Hz, Ar-H), 7.81 (1H, d, *J* = 9.2 Hz, Ar-H), 7.76-7.73 (1H, m, Ar-H), 7.39 (1H, d, *J* = 8.8 Hz, Ar-H), 7.37-7.33 (1H, m, Ar-H), 7.30-7.26 (1H, m, Ar-H), 7.25-7.11 (9H, m, Ar-H), 7.00-6.97 (1H, m, Ar-H), 5.16 (1H, bs, ArOH), 4.37 (2H, s, CH<sub>2</sub>Ph), 4.21 (1H, bs, NH); <sup>13</sup>C NMR (100 MHz, CDCl<sub>3</sub>):  $\delta$  152.0, 144.9, 139.3, 134.1, 133.4, 130.7, 130.5, 129.6, 128.5,

128.3, 128.2, 127.5, 127.2, 127.0, 126.9, 126.7, 124.6, 123.7, 123.4, 122.3, 117.7, 114.1, 108.1, 47.4; MS (EI)  $m/z$  (%) 375 (100)  $[M]^+$ , 284 (45.71), 267 (25.33), 242 (18.00), 230 (6.70), 169 (6.50), 155 (9.21), 98 (25.11), 91 (41.75), 85 (56.27), 71 (61.10), 57 (67.71), 43 (55.74); HRMS (EI) Calcd for  $C_{27}H_{21}NO$   $[M]^+$  requires 375.1623, Found 375.1629.

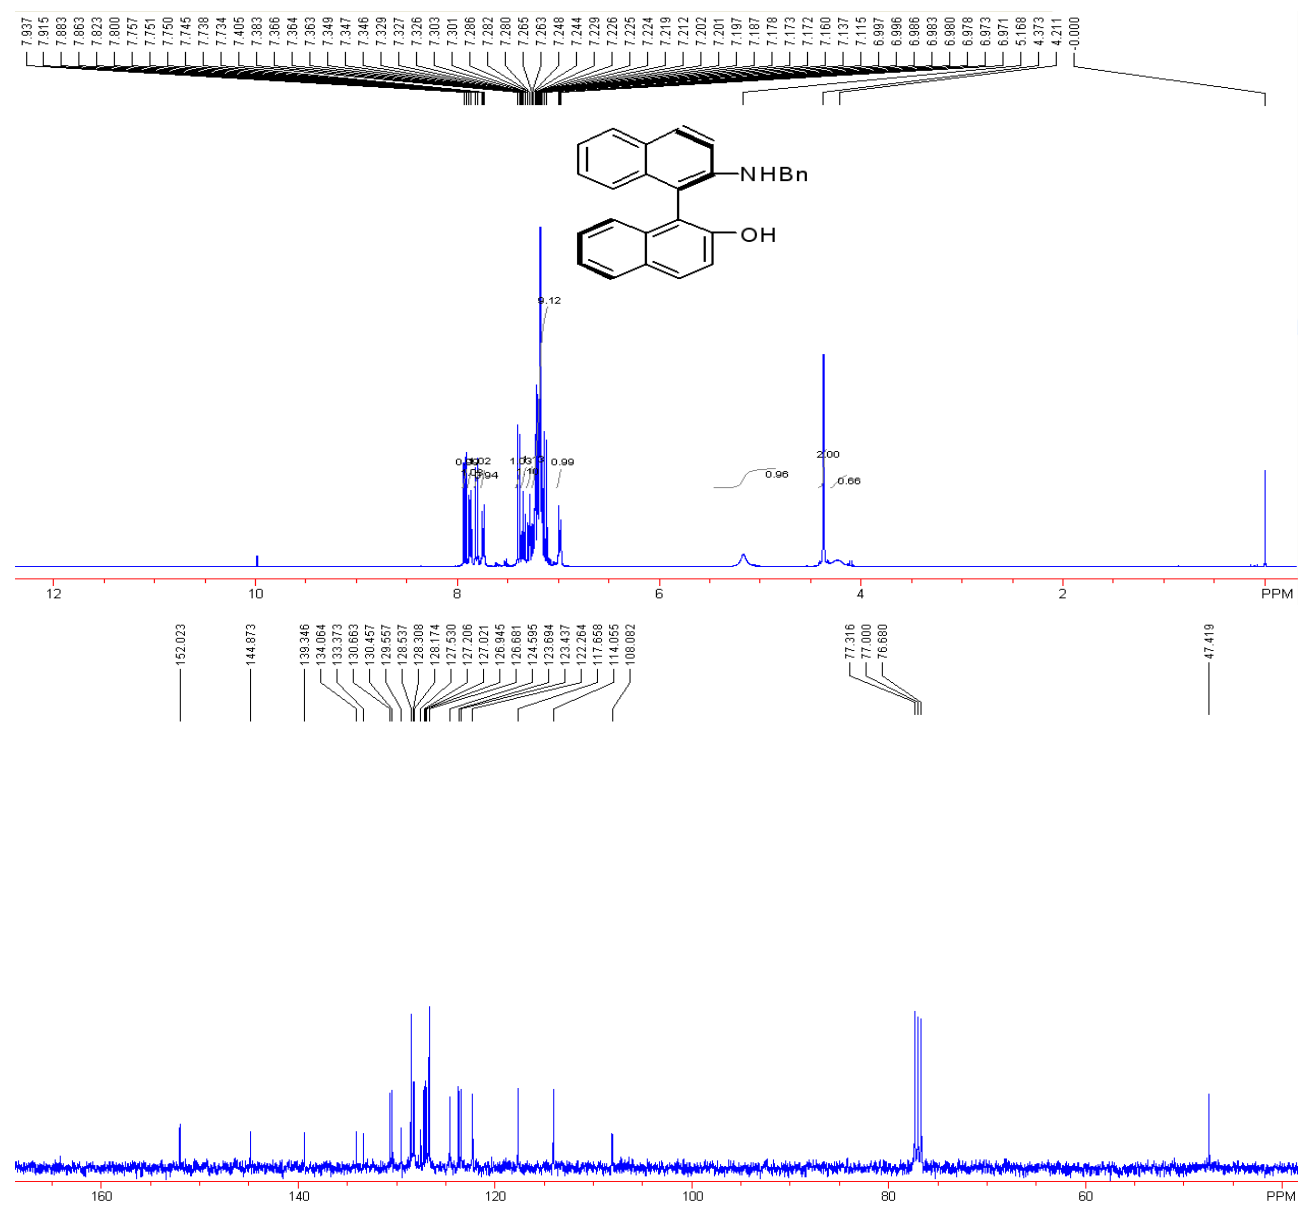

**Compound 4: (*R*)-2'-(benzylamino)-1,1'-binaphthyl-2-yl trifluoromethanesulfonate**

**Procedure:** Compound 3 (1.60 g, 4.27 mmol) was dissolved in 20 mL of  $CH_2Cl_2$  and pyridine (12.81 mmol), and the mixture was cooled to 0 °C with ice-water bath, then  $Tf_2O$  (6.40 mmol) was added slowly. The resulting mixture was stirred at room temperature for 4 hours, and then the reaction was quenched by addition of 0.1 N HCl, and extracted with  $CH_2Cl_2$ , washed by water and brine, dried over anhydrous  $Na_2SO_4$ . The solvent was removed under reduced pressure and the residue was purified by column chromatography on silica gel (EtOAc/PE = 1/16 as eluent) to furnish product 4 as white solid (1.38 g, 2.73 mmol, 64% yield). m.p. 143-146 °C;  $[\alpha]_D^{20} = +49.7$  (c 0.6,  $CHCl_3$ ). IR ( $CH_2Cl_2$ )  $\nu$  3433, 3059, 1781, 1712, 1621, 1600, 1497, 1421, 1344, 1213, 1141, 957,

942, 835, 811, 745  $\text{cm}^{-1}$ ;  $^1\text{H}$  NMR (400 MHz,  $\text{CDCl}_3$ , TMS):  $\delta$  8.07 (1H, d,  $J = 8.8$  Hz, Ar-H), 7.99 (1H, d,  $J = 8.4$  Hz, Ar-H), 7.84 (1H, d,  $J = 8.8$  Hz, Ar-H), 7.77-7.74 (1H, m, Ar-H), 7.60-7.56 (2H, m, Ar-H), 7.49 (1H, d,  $J = 7.8$  Hz, Ar-H), 7.45-7.40 (1H, m, Ar-H), 7.27-7.13 (8H, m, Ar-H), 6.84-6.81 (1H, m, Ar-H), 4.43 (1H, d,  $J = 15.6$  Hz), 4.37 (1H, d,  $J = 15.6$  Hz);  $^{13}\text{C}$  NMR (100 MHz,  $\text{CDCl}_3$ ):  $\delta$  146.0, 144.2, 139.5, 133.6, 133.3, 133.0, 131.0, 130.6, 128.4, 128.1, 127.9, 127.5, 127.4, 127.2, 126.9, 126.8, 126.7, 123.4, 121.9, 119.9, 118.2 ( $\text{CF}_3$ , q,  $J_{\text{C-F}} = 318.6$  Hz), 113.9, 109.0, 47.9;  $^{19}\text{F}$  NMR (376 MHz,  $\text{CDCl}_3$ ,  $\text{CFCl}_3$ ):  $\delta$  -74.6; MS (EI)  $m/z$  (%) 507 (100) [ $\text{M}^+$ ], 374 (93.19), 357 (19.40), 281 (10.40), 268 (19.03), 239 (15.07), 231 (30.76), 91 (57.40), 69(10.21); HRMS (EI) Calcd for  $\text{C}_{28}\text{H}_{20}\text{NO}_3\text{F}_3\text{S}$  [ $\text{M}^+$ ] requires 507.1116, Found 507.1119.

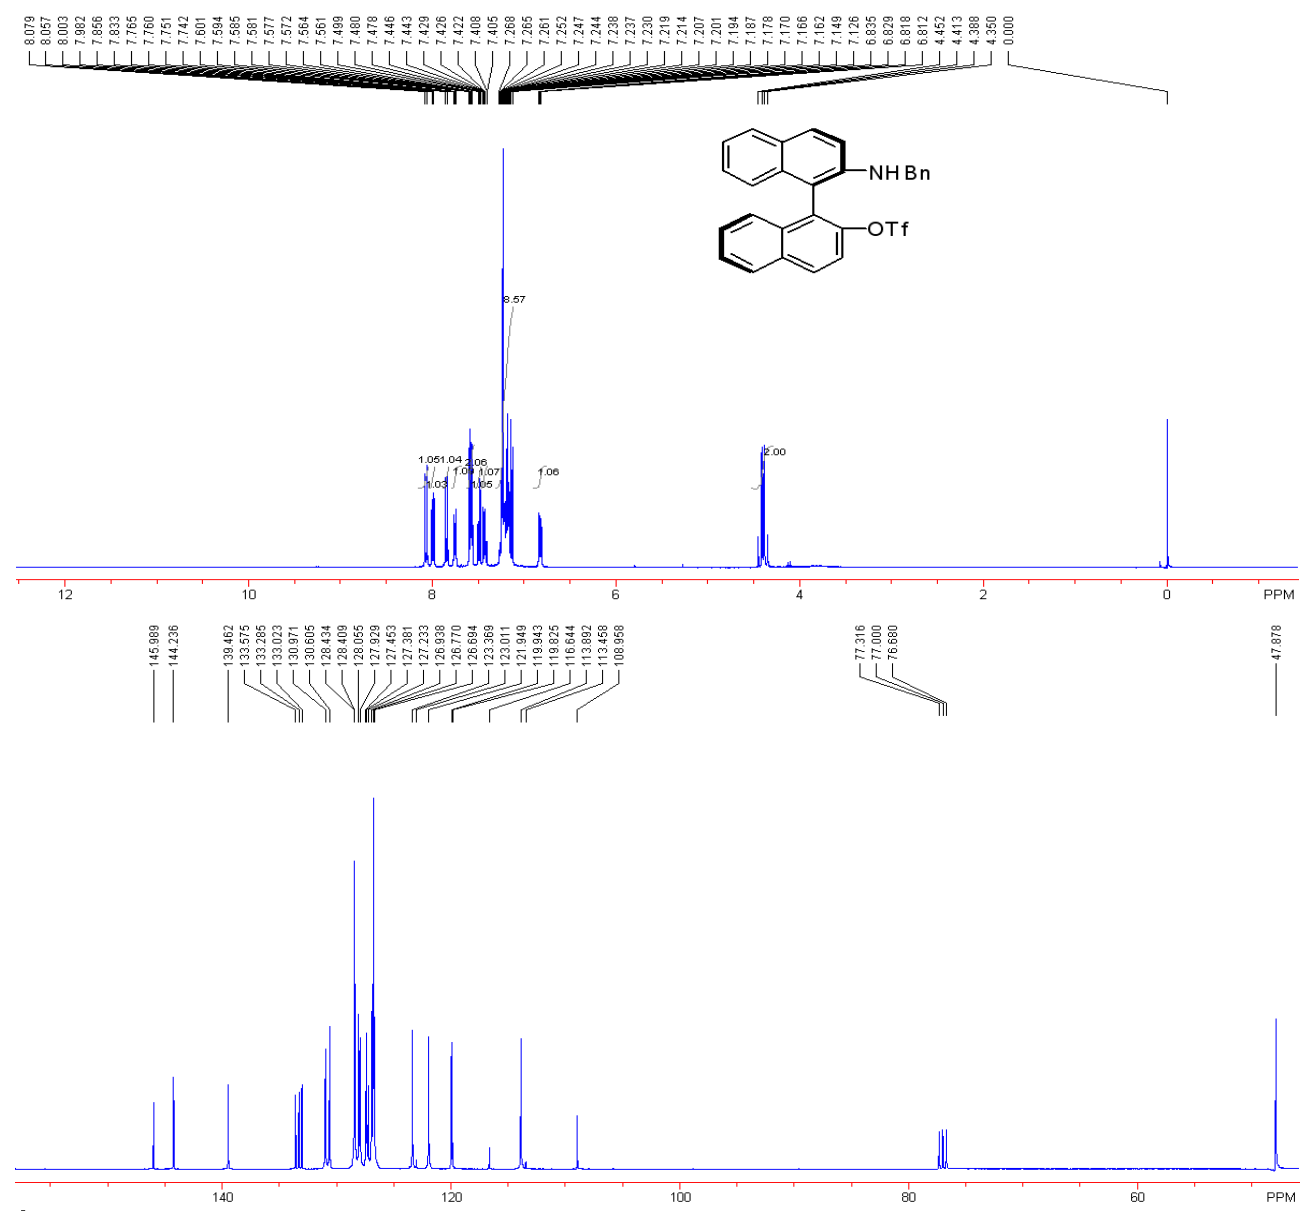

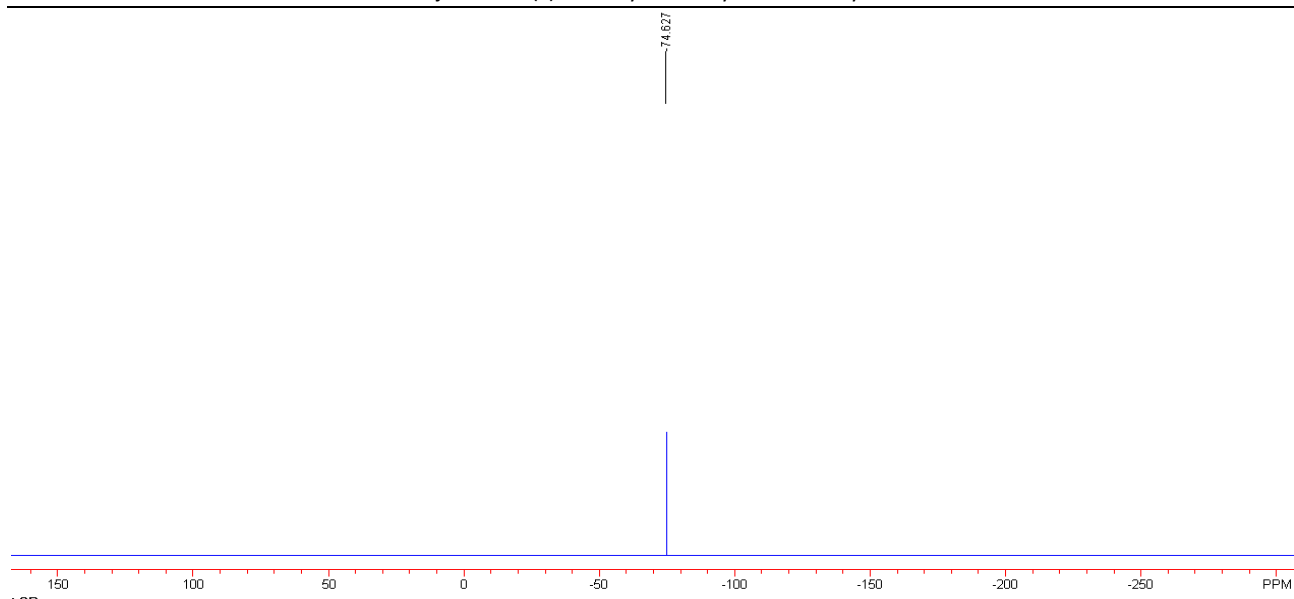

**Compound 5: (*R*)-2'-(acetamino)-1,1'-binaphthyl-2-yl trifluoromethanesulfonate**

**Procedure:** Compound **4** (3.58 g, 7.07 mmol) was dissolved in mixed solvent of EtOH/CHCl<sub>3</sub> (80 mL/20 mL), then 1.2 g of Pd(OH)<sub>2</sub>/C was added into the solution. The resulting mixture was heated to 40-50 °C for 8 hours. After the catalyst was filtered off, the solvent was removed under reduced pressure and the residue was purified by column chromatography on neutral Al<sub>2</sub>O<sub>3</sub> (EtOAc/PE = 1/16 as eluent) to give the corresponding intermediate as white solid (2.60 g, 6.20 mmol, 87% yield). This white solid was dissolved in 10 mL of CH<sub>2</sub>Cl<sub>2</sub> mixed with 1.5 mL AcOH and 3.0 mL Ac<sub>2</sub>O and the resulting mixture was stirred at room temperature overnight. The reaction was quenched by addition of saturated NaHCO<sub>3</sub> solution, extracted with CH<sub>2</sub>Cl<sub>2</sub>, dried over anhydrous Na<sub>2</sub>SO<sub>4</sub>. The solvent was removed under reduced pressure and the residue was purified by column chromatography on silica gel (EtOAc/PE = 1/4 as eluent) to furnish product **5** as off-white solid (2.80 g, 95% yield). This is a known compound.  $[\alpha]_D^{20} = +72.8$  (c 1.0, CHCl<sub>3</sub>). <sup>1</sup>H NMR (400 MHz, CDCl<sub>3</sub>, TMS): δ 8.37 (1H, d, *J* = 8.8 Hz, Ar-H), 8.12 (1H, d, *J* = 9.2 Hz, Ar-H), 8.04 (1H, d, *J* = 9.2 Hz, Ar-H), 7.99 (1H, d, *J* = 8.8 Hz, Ar-H), 7.89 (1H, d, *J* = 8.0 Hz, Ar-H), 7.60-7.55 (2H, m, Ar-H), 7.42-7.34 (3H, m, Ar-H), 7.25 (1H, t, *J* = 8.4 Hz, Ar-H), 7.05 (1H, d, *J* = 8.4 Hz, Ar-H), 6.91 (1H, s, Ar-NH), 1.75 (3H, s, COCH<sub>3</sub>); <sup>19</sup>F NMR (376 MHz, CDCl<sub>3</sub>, CFCl<sub>3</sub>): δ -79.4.



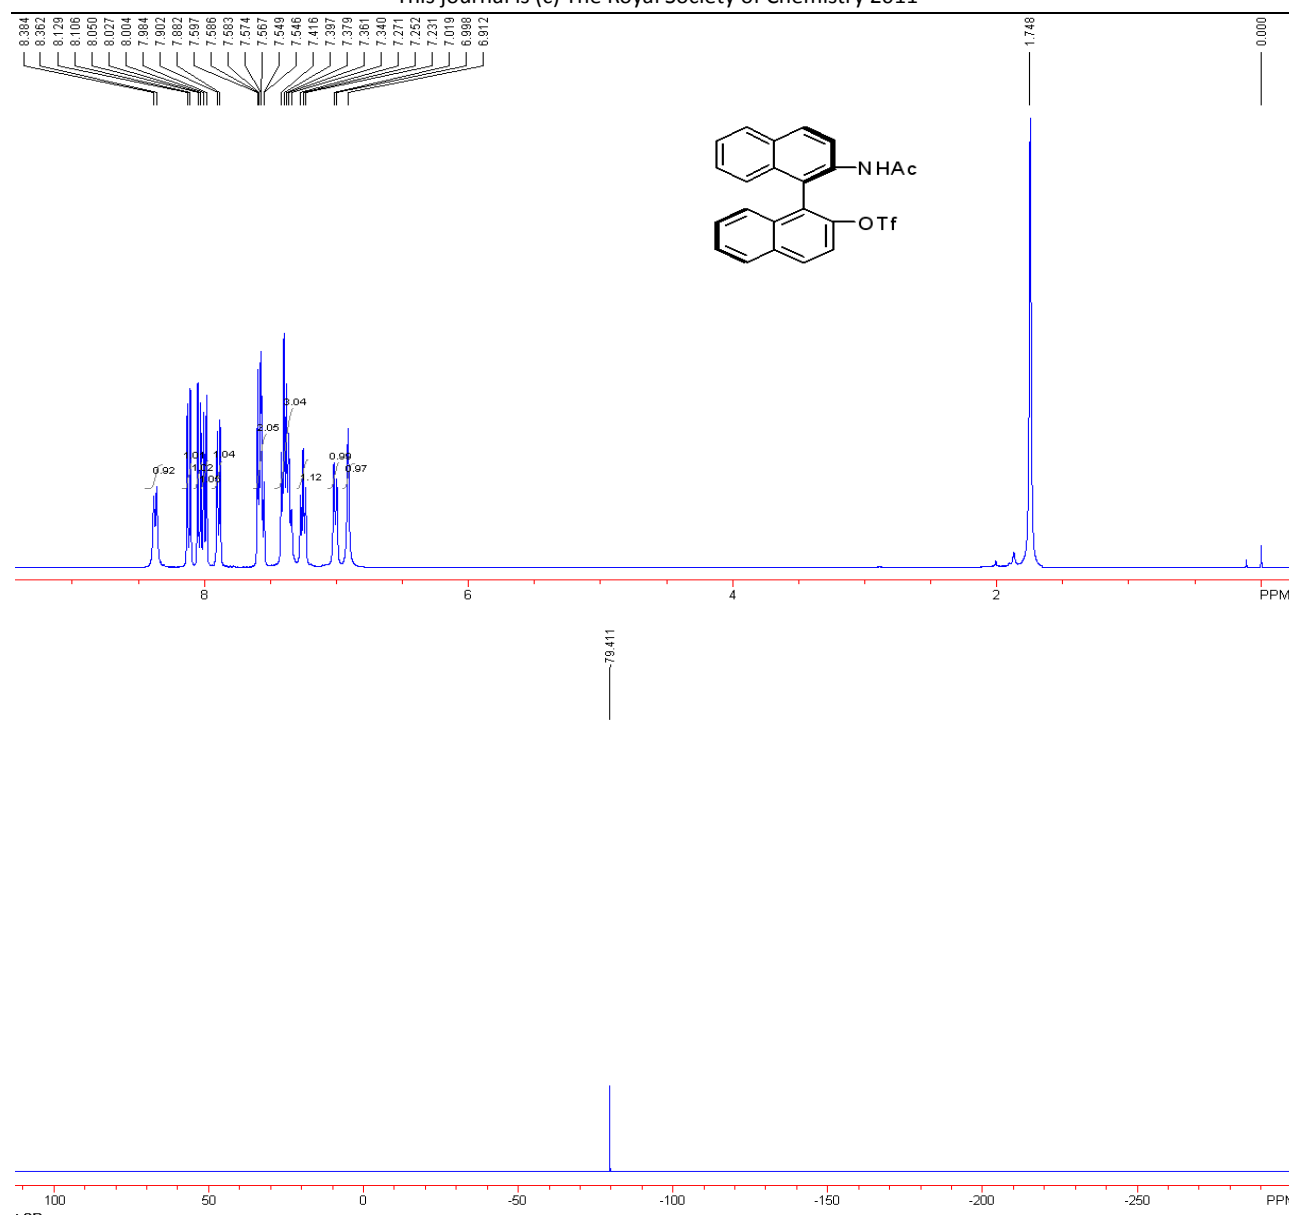

**Compound 6: (*R*)-N-(2'-bis(3,5-dimethylphenyl)phosphoryl)-1,1'-binaphthyl-2-yl)acetamide.**

This was prepared according to the previous literature.<sup>[3]</sup> A white solid. m.p. 110-113 °C;  $[\alpha]_D^{20} = -171.7$  (c 0.6, CHCl<sub>3</sub>). IR (CH<sub>2</sub>Cl<sub>2</sub>)  $\nu$  3052, 3030, 2904, 1794, 1686, 1594, 1501, 1398, 1274, 1174, 1113, 877, 818, 697 cm<sup>-1</sup>; <sup>1</sup>H NMR (400 MHz, CDCl<sub>3</sub>, TMS):  $\delta$  9.84 (1H, s, ArNH), 7.95 (1H, d,  $J = 8.0$  Hz, Ar-H), 7.89 (1H, d,  $J = 8.0$  Hz, Ar-H), 7.73 (1H, d,  $J = 8.8$  Hz, Ar-H), 7.70 (1H, d,  $J = 8.8$  Hz, Ar-H), 7.64-7.59 (3H, m, Ar-H), 7.56-7.49 (2H, m, Ar-H), 7.23-7.15 (3H, m, Ar-H), 7.10 (1H, d,  $J = 8.0$  Hz, Ar-H), 7.00-6.98 (1H, m, Ar-H), 6.73 (1H, s, Ar-H), 6.70 (1H, s, Ar-H), 6.51 (1H, d,  $J = 8.4$  Hz, Ar-H), 6.30 (1H, s, Ar-H), 2.38 (6H, s, ArCH<sub>3</sub>), 1.92 (3H, s, COCH<sub>3</sub>); 1.86 (6H, s, ArCH<sub>3</sub>); <sup>31</sup>P NMR (162 MHz, CDCl<sub>3</sub>, 85% H<sub>3</sub>PO<sub>4</sub>):  $\delta$  28.2; MS (EI)  $m/z$  (%) 567 (52.13) [M<sup>+</sup>], 552 (27.86), 309 (93.79), 267 (100), 257 (40.23), 133 (16.68), 91 (18.90), 57 (29.76), 43 (69.01); HRMS (EI) Calcd for C<sub>38</sub>H<sub>34</sub>NO<sub>2</sub>P [M<sup>+</sup>] requires 567.2327, Found 567.2330.

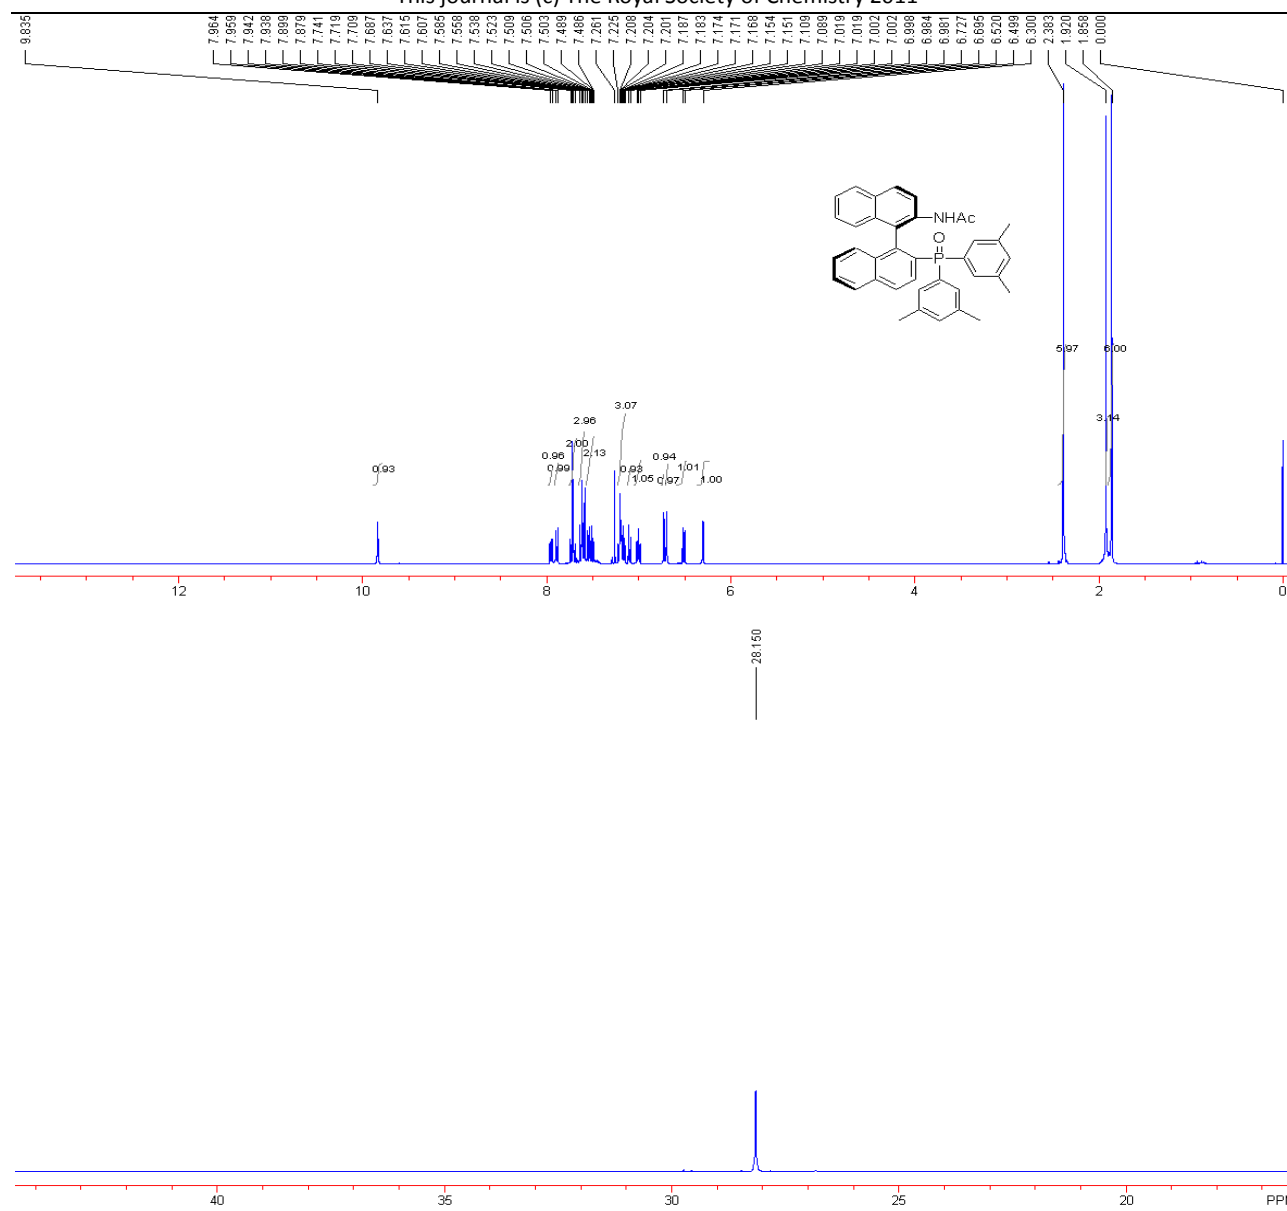

**Compound 7: (*R*)-2'-bis(3,5-dimethylphenyl)phospino)-1,1'-binaphthyl-2-amine**

**Procedure:** Compound **6** (1.0 mmol, 0.57 mg) was dissolved in 20 mL of EtOH, and then 4.0 N HCl solution was added into the mixture. The resulting solution was heated to 60 °C overnight and the reaction was quenched by addition of saturated NaHCO<sub>3</sub> solution, washed with water, extracted by CH<sub>2</sub>Cl<sub>2</sub> twice, dried by anhydrous Na<sub>2</sub>SO<sub>4</sub>. The solution was concentrated for the next step without further purification (quantitative yield). Triethylamine (13.49 g, 25 mmol) in toluene (20 mL) was added into this product mixture (2.80 g, 5.33 mmol) and then trichlorosilane (8.31 g, 12 mmol) was added. The resulting mixture was heated at 110 °C for three days. After being cooled to room temperature, the product mixture was diluted with dichloromethane, quenched with a small amount of saturated NaHCO<sub>3</sub> solution. The resulting suspension was filtered through Celite, and washed with dichloromethane. The combined extracts were dried over anhydrous Na<sub>2</sub>SO<sub>4</sub>, and the residue was chromatographed on silica gel (PE/EA = 8:1 as eluent) to provide compound **7** as white solid (1.85 g, 70% yield). m.p. 119-121 °C ; [ $\alpha$ ]<sub>D</sub><sup>20</sup> = -201.3 (c 1.0, CHCl<sub>3</sub>). IR (CH<sub>2</sub>Cl<sub>2</sub>)  $\nu$  3461,

3328, 3215, 3052, 2917, 1712, 1619, 1600, 1513, 1433, 1358, 1271, 1182, 873, 818, 747, 697  $\text{cm}^{-1}$ ;  
 $^1\text{H}$  NMR (400 MHz,  $\text{CDCl}_3$ , TMS):  $\delta$  7.89 (1H, d,  $J = 4.8$  Hz, Ar-H), 7.87 (1H, d,  $J = 5.2$  Hz, Ar-H),  
7.79 (1H, d,  $J = 8.8$  Hz, Ar-H), 7.72 (1H, d,  $J = 8.0$  Hz, Ar-H), 7.52-7.46 (2H, m, Ar-H), 7.29-7.26  
(2H, m, Ar-H), 7.12-7.09 (1H, m, Ar-H), 7.03 (1H, d,  $J = 7.2$  Hz, Ar-H), 6.94-6.88 (4H, m, Ar-H),  
6.77 (1H, s, Ar-H), 6.65 (1H, d,  $J = 8.0$  Hz, Ar-H), 6.60 (1H, d,  $J = 8.0$  Hz, Ar-H), 3.36 (2H, s,  $\text{NH}_2$ ),  
2.23 (6H, s,  $\text{ArCH}_3$ ), 2.11 (6H, s,  $\text{ArCH}_3$ );  $^{31}\text{P}$  NMR (162 MHz,  $\text{CDCl}_3$ , 85%  $\text{H}_3\text{PO}_4$ ):  $\delta$  -12.9; MS  
(EI)  $m/z$  (%) 509 (0.91) [ $\text{M}^+$ ], 525 (57.07), 267 (100), 266 (19.78), 239 (11.00), 133 (9.62), 99  
(11.37), 85 (24.21), 71 (26.49), 57 (47.14), 43 (25.25); HRMS (EI) Calcd for  $\text{C}_{36}\text{H}_{32}\text{NP}$  [ $\text{M}^+$ ]  
requires 509.2272, Found 509.2271.

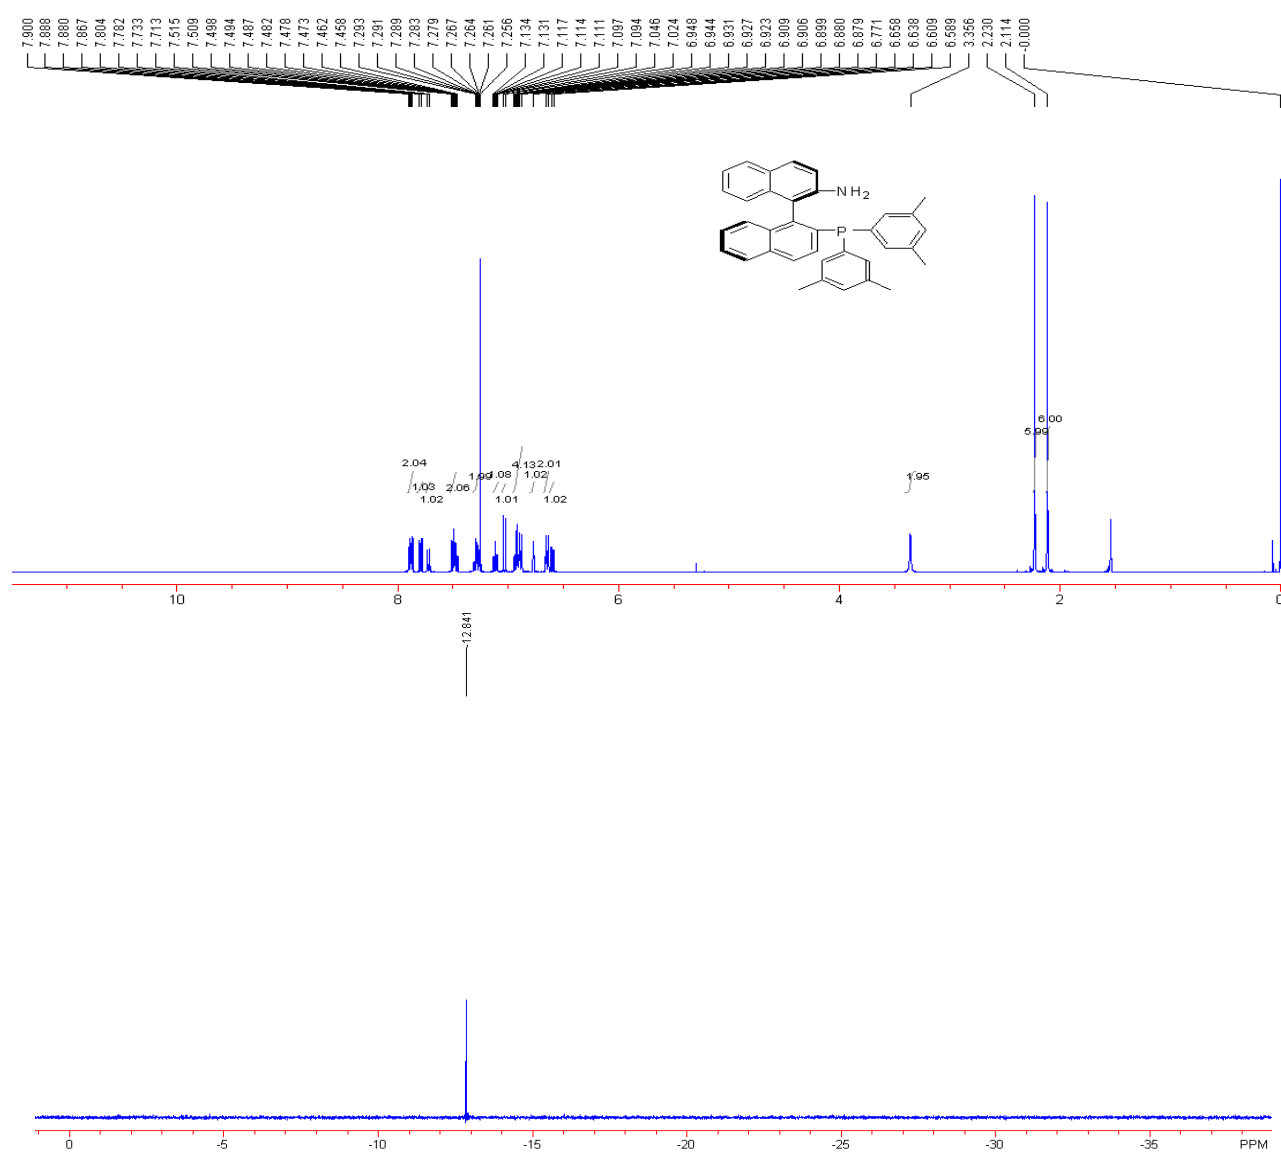

**L1: (R)-1-(2'-(bis(3,5-dimethylphenyl)phosphino)-1,1'-binaphthyl-2-yl)-3-phenylthiourea**

**Procedure:** This compound was prepared according to the previous literature.<sup>[4]</sup> Compound 7 (800 mg, 1.57 mmol) was dissolved in 2.0 mL of dry THF, and then isothiocyanatobenzene (255 mg, 1.88 mmol) was added and the reaction mixture was heated to 60  $^\circ\text{C}$  under argon for 7 days. After cooling to room temperature, the solution was concentrated by vacuum and the residue was purified

by column chromatography on silica gel (EtOAc/PE = 1/8 as eluent) to provide **L1** as white solid (620 mg, 61% yield). m.p. 112-115 °C;  $[\alpha]_D^{20} = +158.2$  (c 0.6, CHCl<sub>3</sub>). IR (CH<sub>2</sub>Cl<sub>2</sub>) v 3326, 3044, 2963, 1789, 1707, 1595, 1497, 1308, 1261, 1183, 1117, 840, 817, 748, 692 cm<sup>-1</sup>; <sup>1</sup>H NMR (400 MHz, CDCl<sub>3</sub>, TMS): δ 8.07 (1H, d, *J* = 8.8 Hz), 7.97 (2H, d, *J* = 8.8 Hz), 7.90 (2H, d, *J* = 8.4 Hz), 7.80 (1H, d, *J* = 8.0 Hz), 7.50-7.41 (3H, m) 7.30-7.19 (3H, m), 7.09-7.06 (3H, m), 6.91-6.88 (2H, m), 6.74 (4H, d, *J* = 7.8 Hz), 6.67 (1H, s), 6.62 (1H, d, *J* = 8.4 Hz), 6.53 (2H, d, *J* = 8.8 Hz), 2.18 (6H, s, ArCH<sub>3</sub>), 2.04 (6H, s, ArCH<sub>3</sub>); <sup>31</sup>P NMR (162 MHz, CDCl<sub>3</sub>, 85% H<sub>3</sub>PO<sub>4</sub>): δ -12.8; MS (ESI) *m/z* (%) 645.5 [M<sup>+</sup>+H]; HRMS (ESI) Calcd for C<sub>43</sub>H<sub>38</sub>N<sub>2</sub>PS [M<sup>+</sup>+H] requires 645.2488, Found 645.2483.

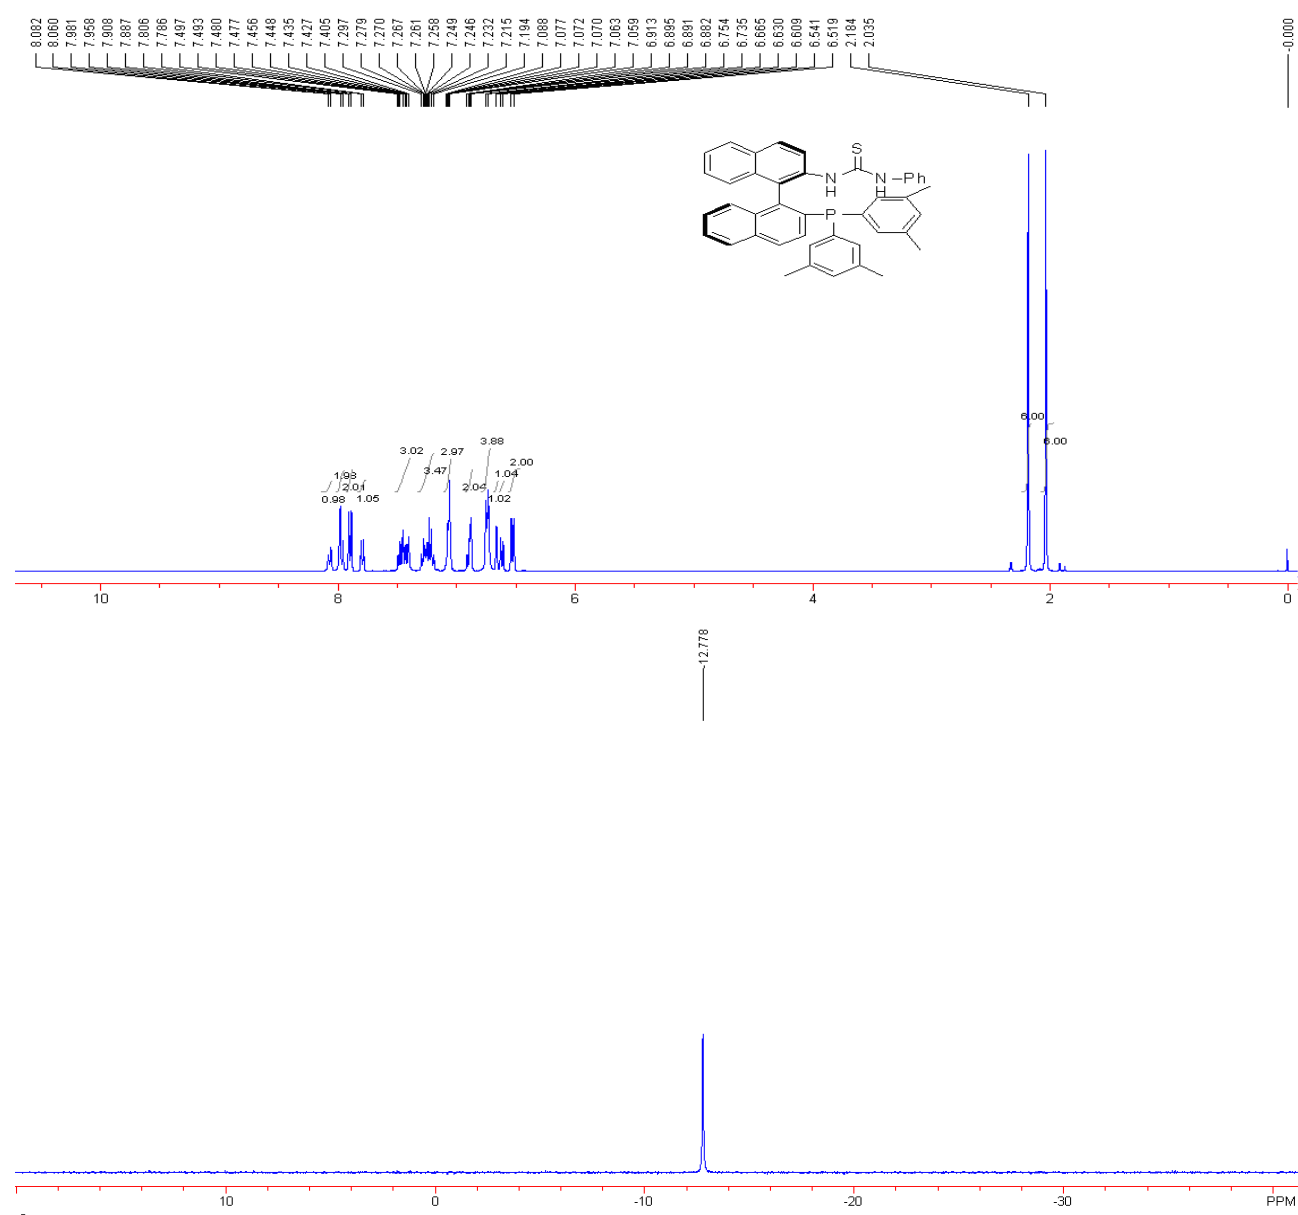

**L2: (R)-1-benzyl-3-(2'-(bis(3,5-dimethylphenyl)phosphino)-1,1'-binaphthyl-2-yl)thiourea**

**Procedure:** Compound **7** (800.0 mg, 1.57 mmol) was dissolved in 2.0 mL dry THF, and then (isothiocyanatomethyl)benzene (280.7 mg, 1.88 mmol) was added. The resulting mixture was heated to 60 °C under argon for 7 days, cooled to room temperature, concentrated by vacuum, and

the residue was purified by column chromatography on silica gel (EtOAc/PE = 1/8 as eluent) to provide **L2** as white solid (580.0 mg, 56% yield). m.p. 116-119 °C;  $[\alpha]_D^{20} = +190.5$  (c 0.5, CHCl<sub>3</sub>). IR (CH<sub>2</sub>Cl<sub>2</sub>)  $\nu$  3367, 3058, 2921, 1782, 1697, 1424, 1369, 1254, 1179, 1143, 1076, 848, 819, 747, 693 cm<sup>-1</sup>; <sup>1</sup>H NMR (400 MHz, CDCl<sub>3</sub>, TMS):  $\delta$  7.95 (1H, d,  $J = 8.8$  Hz), 7.91-7.89 (2H, m), 7.84 (1H, d,  $J = 8.4$  Hz), 7.55-7.46 (3H, m), 7.39-7.35 (1H, m), 7.22-7.17 (4H, m), 7.05-7.00 (4H, m), 6.98 (1H, s), 6.94 (1H, s), 6.83 (1H, d,  $J = 8.4$  Hz), 6.75 (2H, d,  $J = 8.8$  Hz), 6.56 (2H, d,  $J = 8.8$  Hz), 6.40 (1H, brs), 4.77-4.74 (1H, m), 3.99 (1H, dd,  $J_1 = 14.8$  Hz,  $J_2 = 4.0$  Hz), 2.27 (6H, s, ArCH<sub>3</sub>), 2.07 (6H, s, ArCH<sub>3</sub>); <sup>31</sup>P NMR (162 MHz, CDCl<sub>3</sub>, 85% H<sub>3</sub>PO<sub>4</sub>):  $\delta$  -14.0; MS (ESI)  $m/z$  (%) 659.6 [M<sup>+</sup>+H]; HRMS (ESI) Calcd for C<sub>44</sub>H<sub>40</sub>N<sub>2</sub>PS [M<sup>+</sup>+H] requires 659.2644, Found 659.2651.

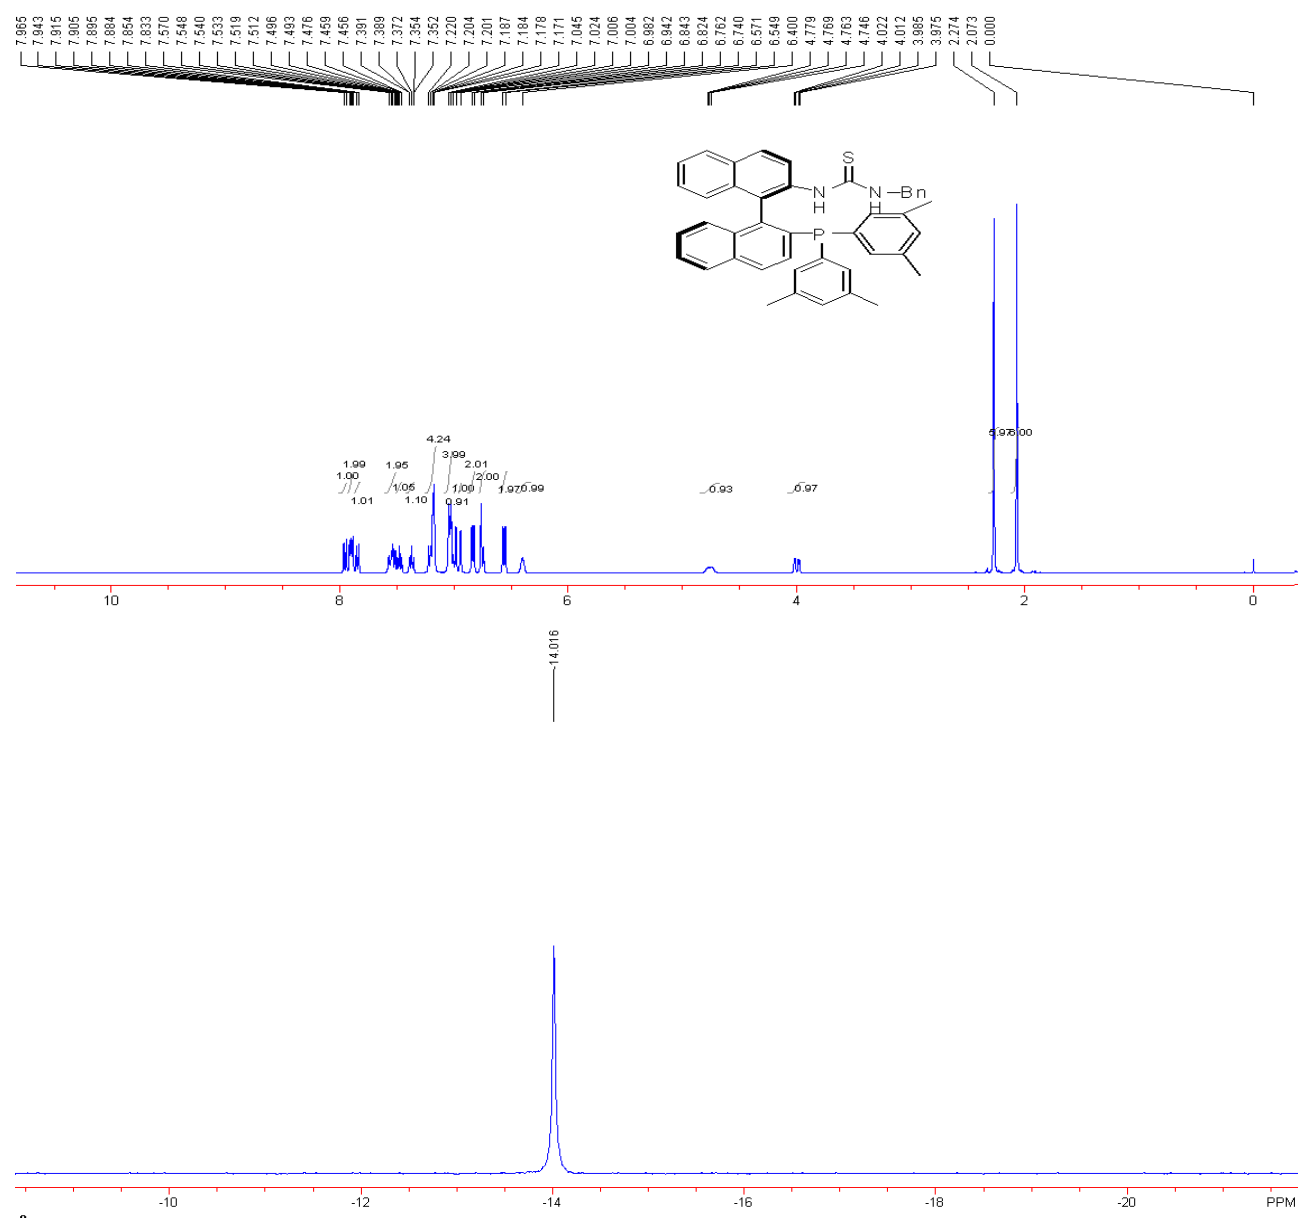

**L3: (R)-1-(2'-(diphenylphosphino)-1,1'-binaphthyl-2-yl)-3-phenylurea**

This is a known compound.  $[\alpha]_D^{20} = +72.3$  (c 0.5, CHCl<sub>3</sub>). <sup>1</sup>H NMR (400 MHz, CDCl<sub>3</sub>, TMS):  $\delta$  8.32 (1H, d,  $J = 8.8$  Hz), 8.00 (1H, d,  $J = 8.8$  Hz), 7.91 (2H, t,  $J = 8.4$  Hz), 7.85 (1H, d,  $J = 8.8$  Hz), 7.52 (1H, t,  $J = 7.6$  Hz), 7.40 (1H, dd,  $J_1 = 8.8$  Hz,  $J_2 = 2.8$  Hz), 7.32-6.95 (17H, m), 6.76 (1H, d,  $J$

= 8.8 Hz), 6.68 (2H, d,  $J = 7.6$  Hz), 5.97 (1H, s), 5.94 (1H, s);  $^{31}\text{P}$  NMR (162 MHz,  $\text{CDCl}_3$ , 85%  $\text{H}_3\text{PO}_4$ ):  $\delta$  -14.3.

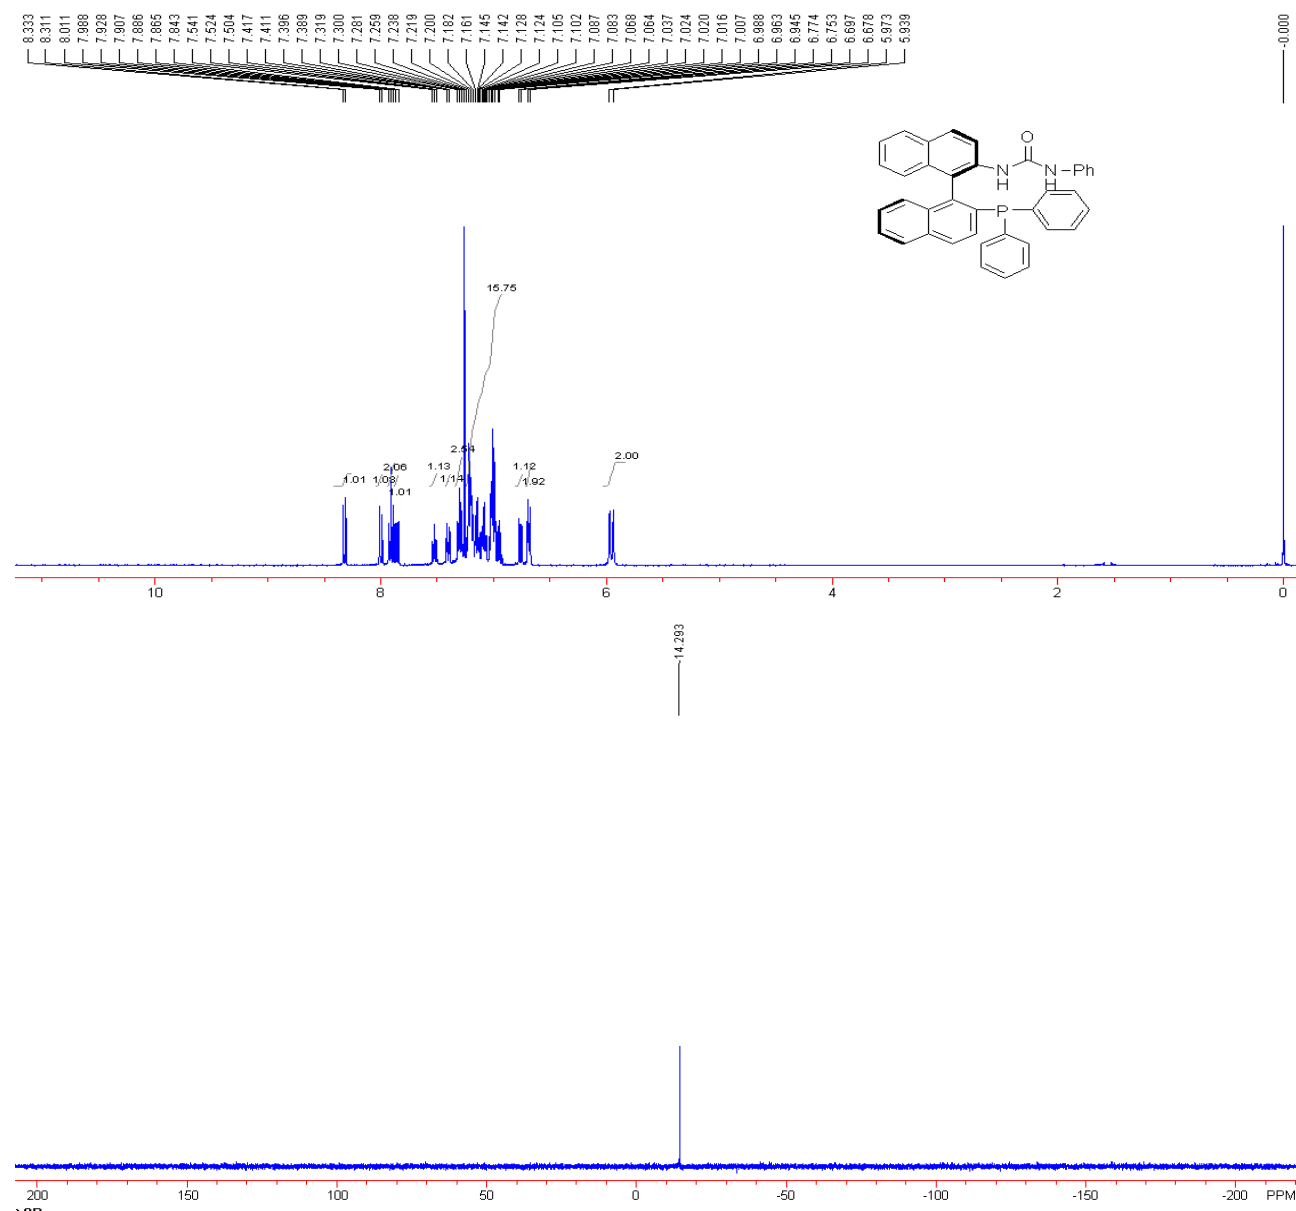**L4:****(R)-1-(2'-(bis(3,5-dimethylphenyl)phosphino)-1,1'-binaphthyl-2-yl)-3-(3,5-bis(trifluoromethyl)phenyl)thiourea**

A white solid. yield: 77%. m.p. 118-122 °C;  $[\alpha]_{\text{D}}^{20} = +348.3$  (c 0.5,  $\text{CHCl}_3$ ). IR ( $\text{CH}_2\text{Cl}_2$ )  $\nu$  3052, 2921, 1779, 1707, 1580, 1473, 1383, 1277, 1250, 1178, 1134, 992, 883, 847  $\text{cm}^{-1}$ ;  $^1\text{H}$  NMR (400 MHz,  $\text{CDCl}_3$ , TMS):  $\delta$  8.28 (1H, d,  $J = 4.8$  Hz), 8.11 (1H, d,  $J = 8.8$  Hz), 7.97-7.93 (3H, m), 7.66-7.61 (4H, m), 7.54-7.46 (3H, m), 7.30-7.27 (2H, m), 7.11 (1H, d,  $J = 8.8$  Hz), 7.08-7.04 (1H, m), 6.81 (1H, s), 6.78 (1H, s), 6.75 (1H, d,  $J = 8.8$  Hz), 6.73 (1H, s), 6.71 (1H, s), 6.60 (1H, s), 6.58 (1H, s), 2.11 (6H, s,  $\text{ArCH}_3$ ), 2.10 (6H, s,  $\text{ArCH}_3$ );  $^{31}\text{P}$  NMR (162 MHz,  $\text{CDCl}_3$ , 85%  $\text{H}_3\text{PO}_4$ ):  $\delta$  -13.5;  $^{19}\text{F}$  NMR (376 MHz,  $\text{CDCl}_3$ ,  $\text{CFCl}_3$ ):  $\delta$  -63.0; MS (ESI)  $m/z$  (%) 781.4 [ $\text{M}^+\text{H}$ ]; HRMS (ESI) Calcd for  $\text{C}_{45}\text{H}_{36}\text{F}_6\text{N}_2\text{PS}$  [ $\text{M}^+\text{H}$ ] requires 781.2236, Found 781.2239.

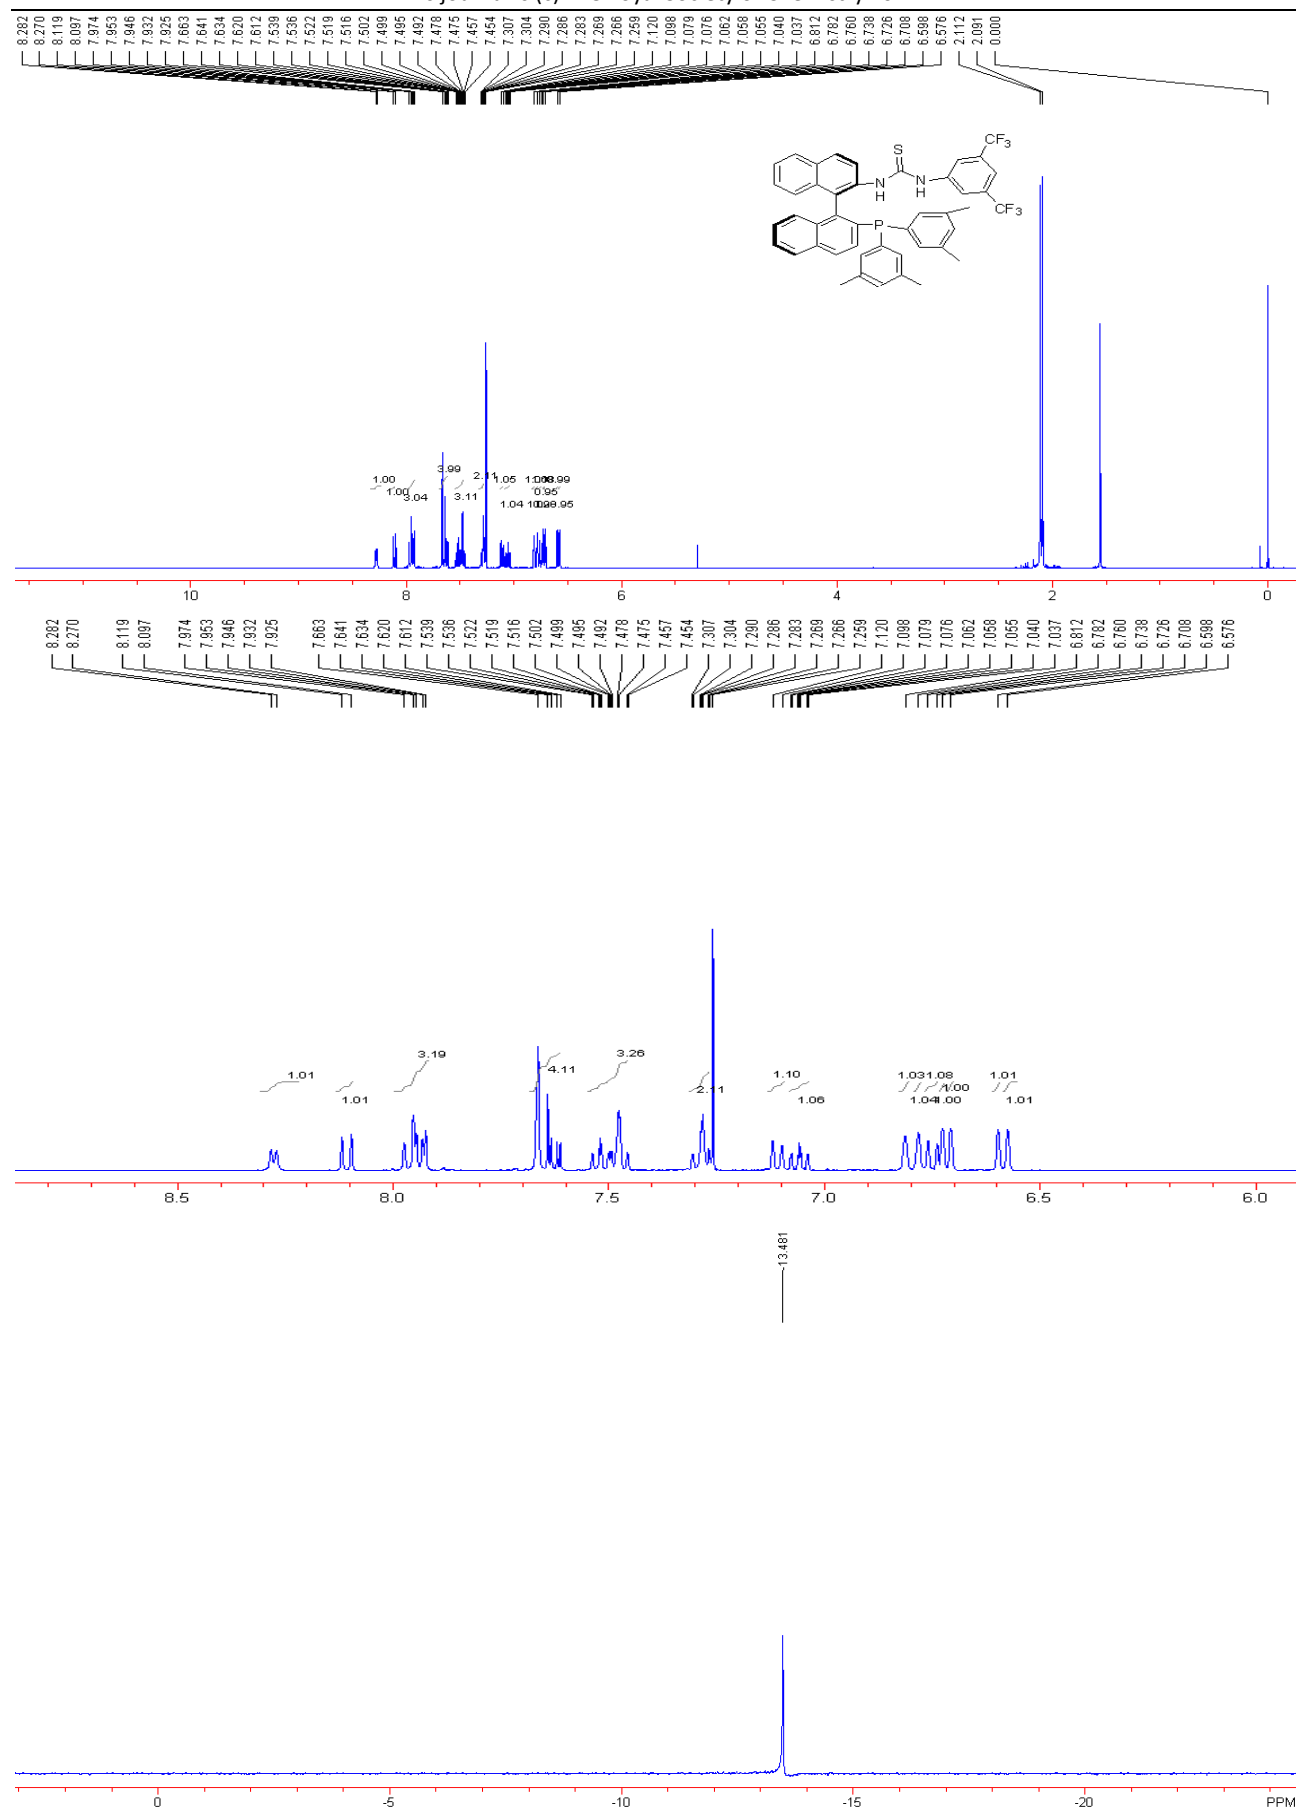

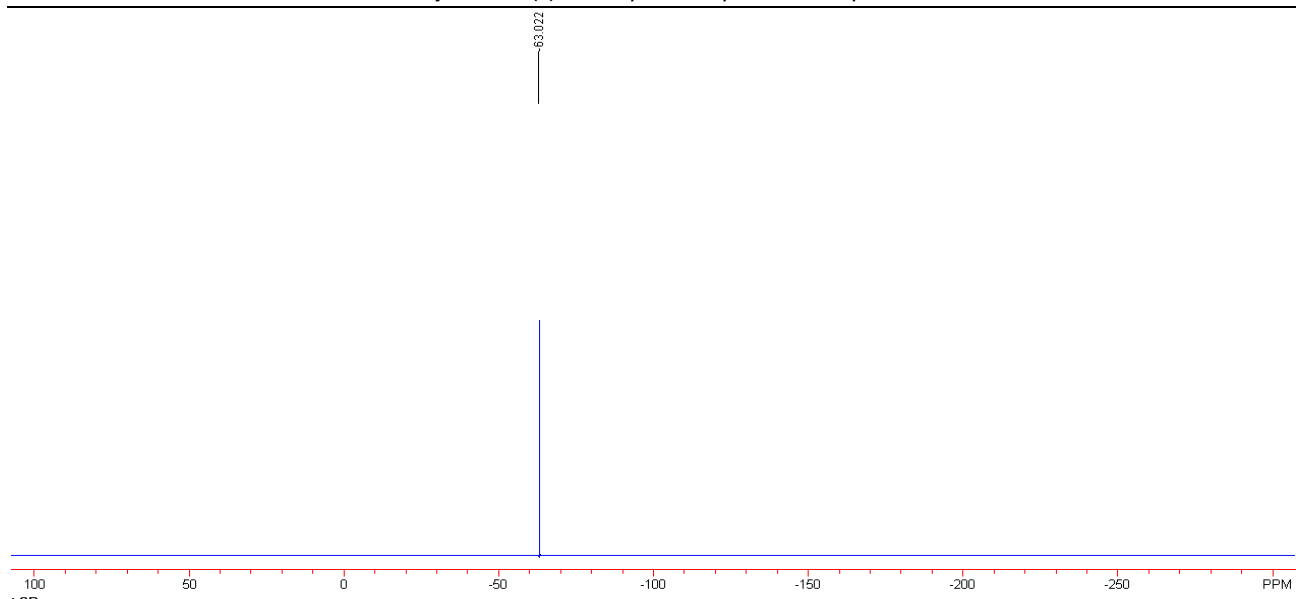

**L6: (*R*)-1-benzyl-3-(2'-(bis(3,5-dimethoxyphenyl)phosphino)-1,1'-binaphthyl-2-yl)thiourea**

A white solid. yield: 58%. m.p. 103-105 °C;  $[\alpha]_D^{20} = +123.8$  (c 0.5, CHCl<sub>3</sub>). IR (CH<sub>2</sub>Cl<sub>2</sub>) v 2932, 1580, 1524, 1485, 1453, 1411, 1327, 1280, 1202, 1153, 1060, 1042, 817, 747 cm<sup>-1</sup>; <sup>1</sup>H NMR (400 MHz, CDCl<sub>3</sub>, TMS): δ 7.97 (1H, d, *J* = 8.8 Hz), 7.93 (2H, d, *J* = 8.8 Hz), 7.83 (1H, d, *J* = 8.0 Hz), 7.59 (1H, d, *J* = 8.4 Hz), 7.53-7.48 (2H, m), 7.37-7.28 (2H, m), 7.23-7.19 (3H, m), 7.13-7.11 (2H, m), 7.05-6.96 (3H, m), 6.71 (1H, d, *J* = 8.8 Hz), 6.47-6.42 (2H, m), 6.37 (1H, d, *J* = 2.4 Hz), 6.35 (1H, d, *J* = 2.4 Hz), 6.23 (1H, t, *J* = 2.4 Hz), 6.09 (1H, d, *J* = 2.4 Hz), 6.07 (1H, d, *J* = 2.4 Hz), 4.78 (1H, brs, CH<sub>2</sub>Ph), 4.23 (1H, dd, *J*<sub>1</sub> = 12.8 Hz, *J*<sub>2</sub> = 3.6 Hz, CH<sub>2</sub>Ph), 3.70 (6H, s, ArOCH<sub>3</sub>), 3.55 (6H, s, ArOCH<sub>3</sub>); <sup>31</sup>P NMR (CDCl<sub>3</sub>, 162 MHz, 85% H<sub>3</sub>PO<sub>4</sub>): δ -10.4; MS (ESI) *m/z* (%) 723.4 [M<sup>+</sup>+H]; HRMS (ESI) Calcd for C<sub>44</sub>H<sub>40</sub>O<sub>4</sub>N<sub>2</sub>PS [M<sup>+</sup>+H] requires 723.2448, Found 723.2441.

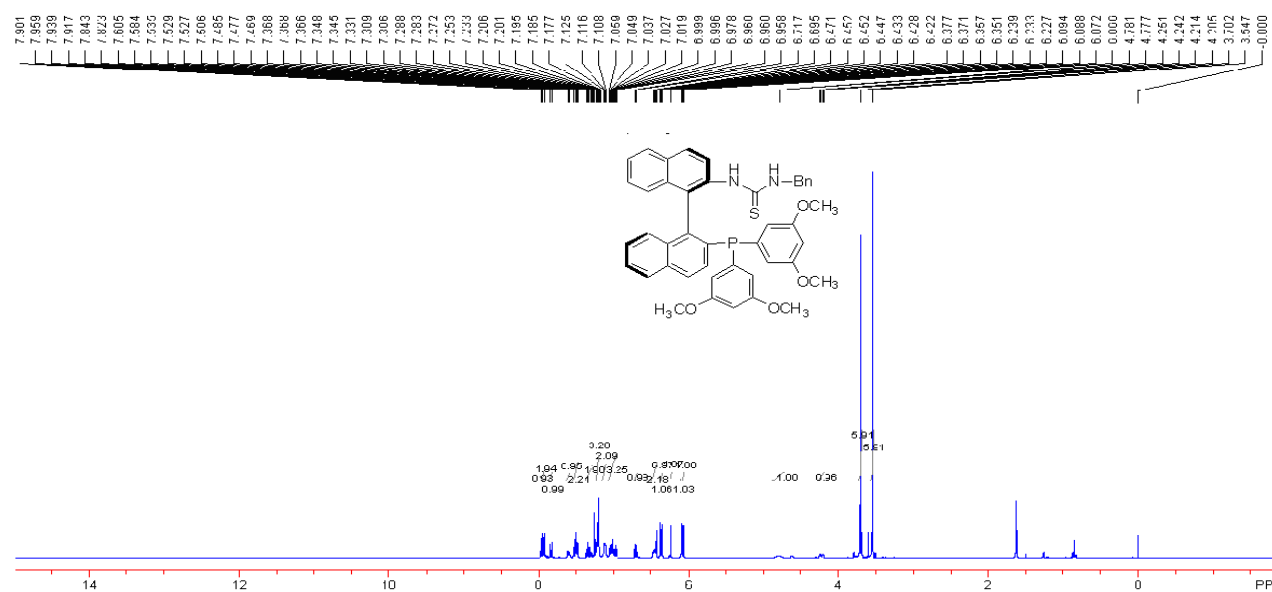



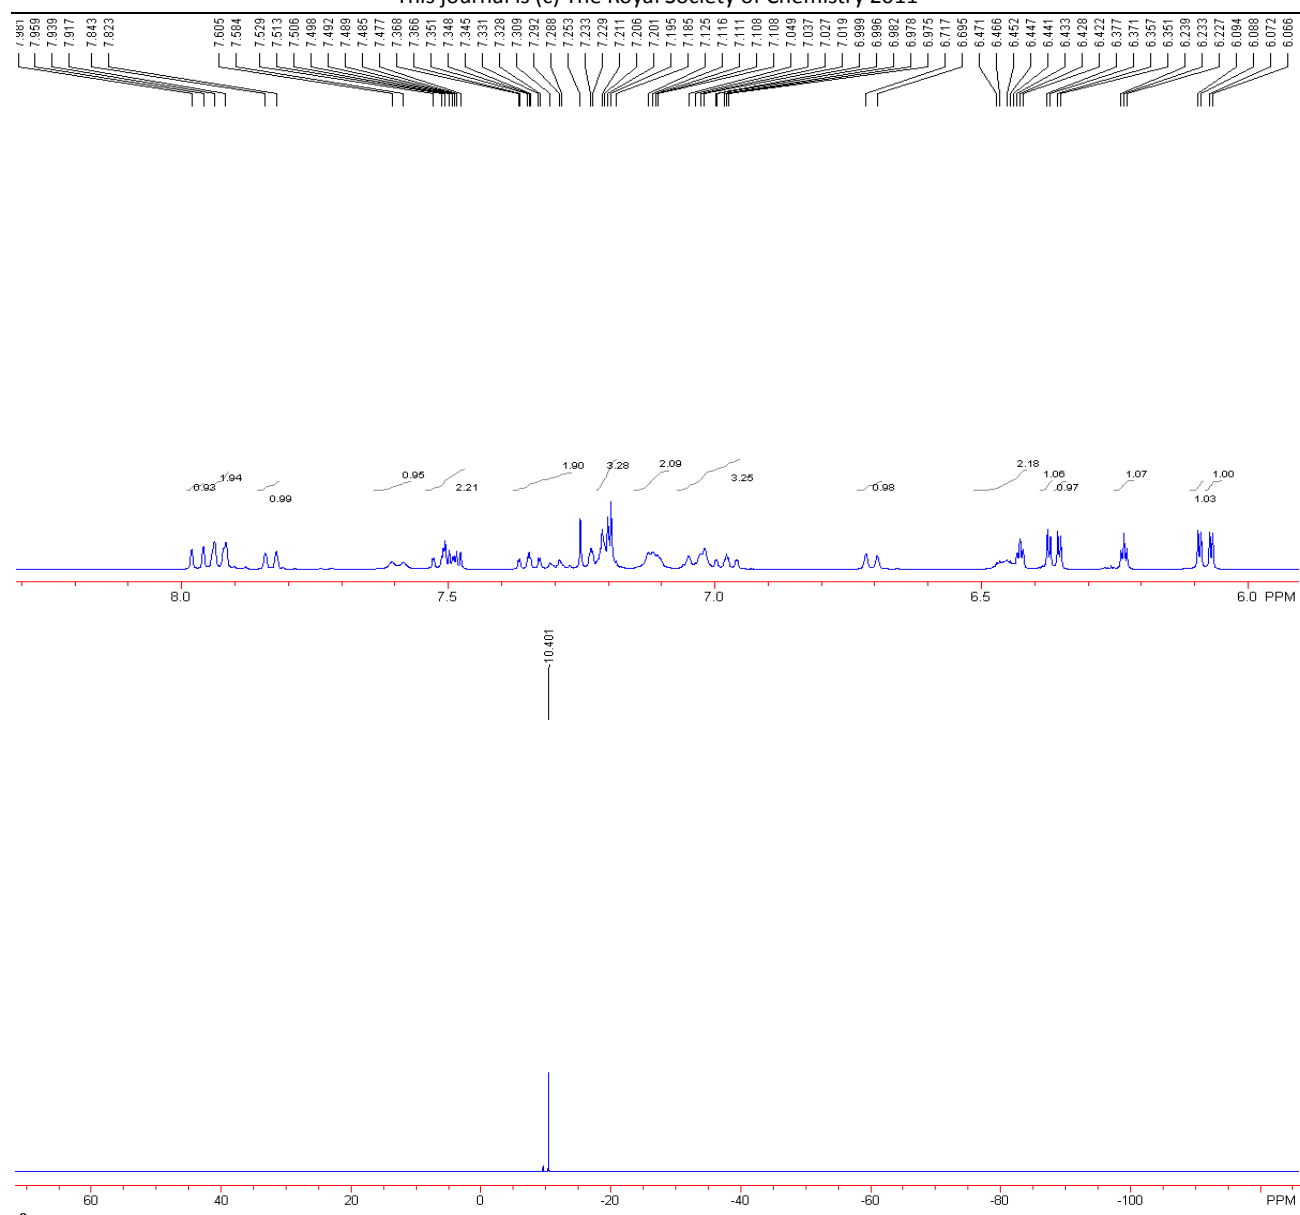**Reference:**

- [1] a) Obrecht, D.; Altorfer, M.; Lehmann, C.; Schönholzer, P.; Müller, K. *J. Org. Chem.* **1996**, *61*, 4080. b) Chen, F. M. F.; Kuroda, K.; Benoiton, N. L. *Synthesis* **1979**, 230.
- [2] Takashi, O.; Kohsuke, O.; Keiji, M. *J. Am. Chem. Soc.* **2007**, *129*, 2410.
- [3] Štěpán, V.; Martin, S.; Vladimír, H.; Miroslav, P.; Pavel, K. *J. Org. Chem.* **1998**, *63*, 7738.
- [4] Shi, Y.-L.; Shi, M. *Adv. Synth. Catal.* **2007**, *349*, 2129.

**Typical procedure for the preparation of Boc-protected Morita-Baylis-Hillman adducts.**

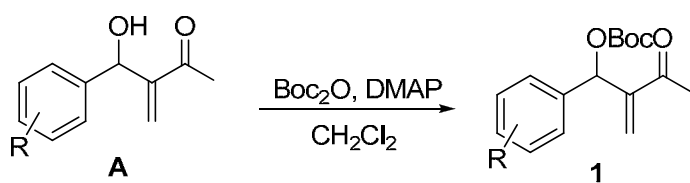

To an ice-water cooled solution of **A** (10.0 mmol) in dry  $\text{CH}_2\text{Cl}_2$  (20.0 mL) was added  $\text{Boc}_2\text{O}$  (11.0 mmol) and DMAP (0.5 mmol) in dry  $\text{CH}_2\text{Cl}_2$  (20.0 mL) over half an hour. The reaction mixture was stirred at room temperature overnight. The solution was washed with aqueous hydrochloric acid (15%, 20 mL), saturated sodium bicarbonate (20 mL), and brine (20 mL) sequentially, dried over anhydrous sodium sulfate, concentrated, and purified by column chromatography to get the product

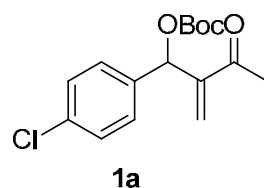

tert-butyl 1-(4-chlorophenyl)-2-methylene-3-oxobutyl carbonate **1a**: a white solid; yield: 77%; m.p. 97-99 °C;  $^1\text{H}$  NMR (400 MHz,  $\text{CDCl}_3$ , TMS)  $\delta$  7.34-7.27 (m, 4H), 6.50 (s, 1H), 6.23 (brs, 1H), 6.16 (d,  $J = 1.2$  Hz, 1H), 2.31 (s, 3H), 1.45 (s, 9H);  $^{13}\text{C}$  NMR (100 MHz,  $\text{CDCl}_3$ )  $\delta$  197.2, 152.4, 147.4, 136.9, 134.1, 128.8, 128.6, 125.5, 82.8, 74.3, 27.7, 26.0; IR (neat)  $\nu$  3065, 3034, 2981, 2934, 1745, 1681, 1370, 1277, 1159  $\text{cm}^{-1}$ ; MS (%)  $m/e$  254 (M- $\text{C}_4\text{H}_8$ , 19), 209 (71), 195 (24), 193 (30), 192 (40), 175 (70), 115 (56), 57 (100), 43 (81); HRMS (EI) for  $\text{C}_{12}\text{H}_{10}\text{O}_4\text{Cl}$  (M- $\text{C}_4\text{H}_8$ ): 253.0268; Found: 253.0265.

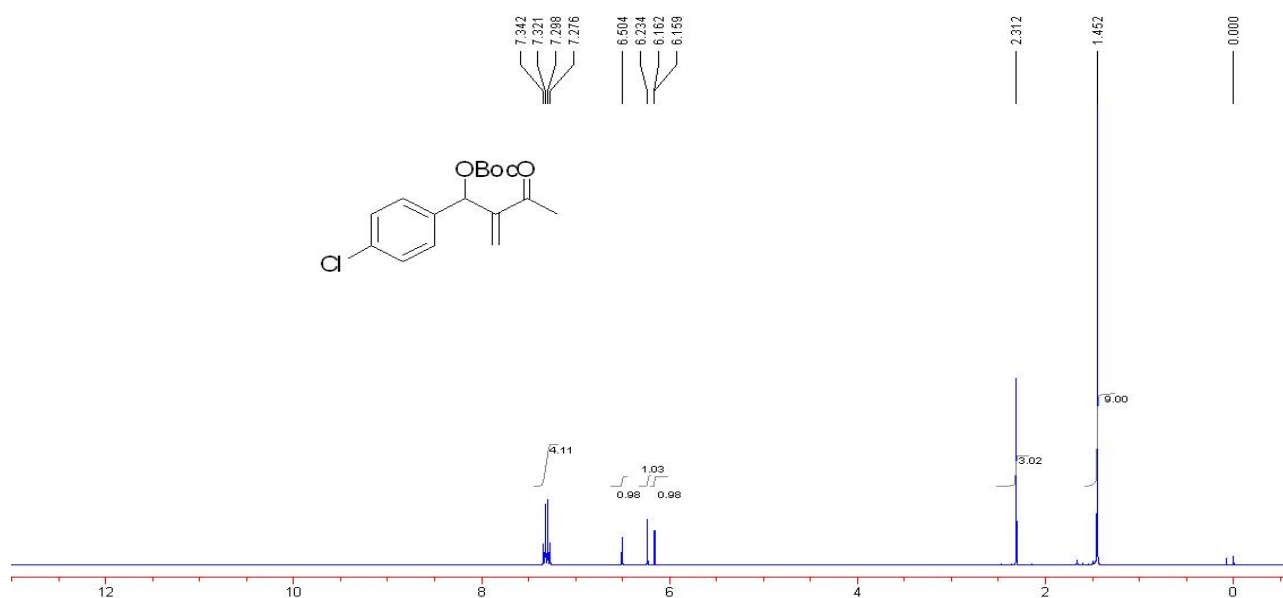

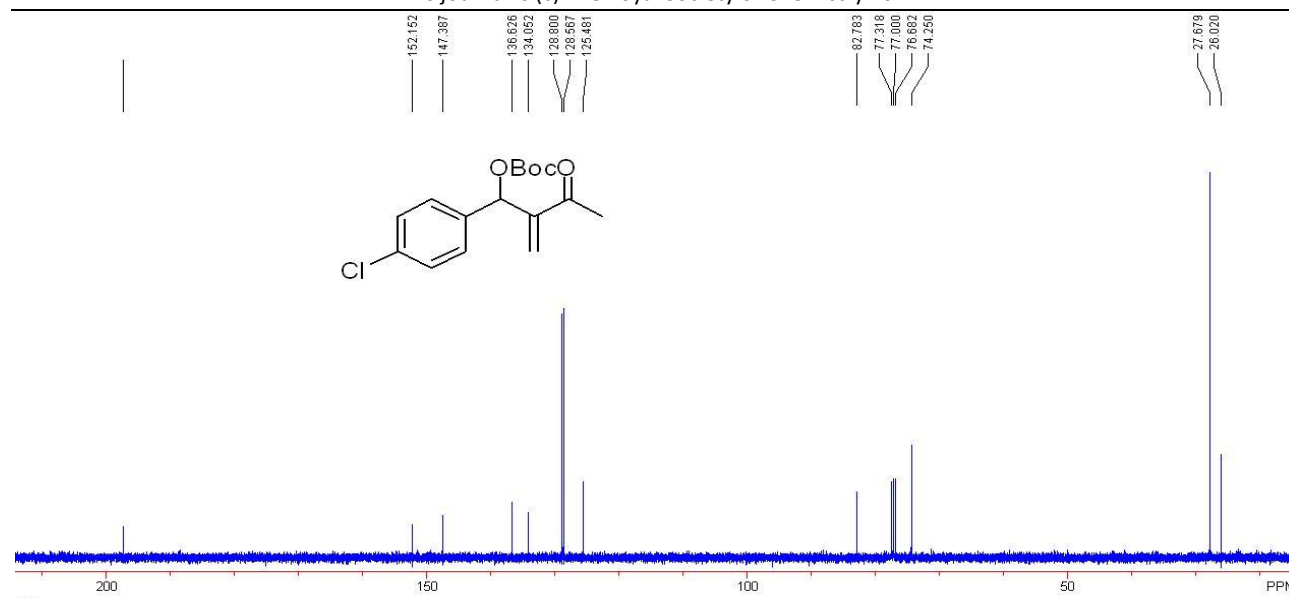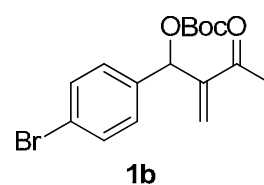

*tert*-butyl 1-(4-bromophenyl)-2-methylene-3-oxobutyl *tert*-butyl carbonate **1b**: a white solid; yield: 67%; m.p. 101-103 °C; <sup>1</sup>H NMR (400 MHz, CDCl<sub>3</sub>, TMS) δ 7.45-7.43 (m, 2H), 7.28-7.25 (m, 2H), 6.50 (s, 1H), 6.24 (s, 1H), 6.16 (s, 1H), 2.31 (s, 3H), 1.45 (s, 9H); <sup>13</sup>C NMR (100 MHz, CDCl<sub>3</sub>) δ 197.1, 152.1, 147.3, 137.4, 131.5, 129.1, 125.5, 122.2, 82.7, 74.2, 27.6, 26.0. IR (neat) ν 2981, 2934, 1746, 1681, 1370, 1488, 1370, 1280, 1157, 1084, 1073 cm<sup>-1</sup>; MS (ESI) m/e 377 (M+Na); HRMS (ESI) for C<sub>16</sub>H<sub>19</sub>BrNaO<sub>4</sub> (M+Na): 377.0359; Found: 377.0359.

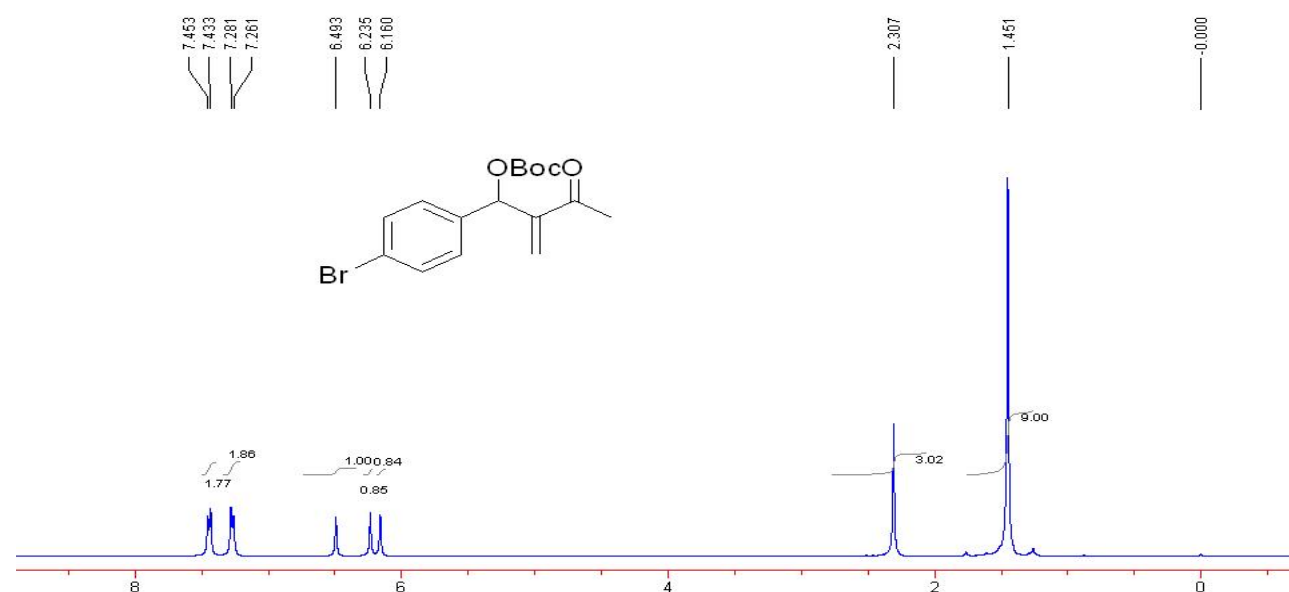

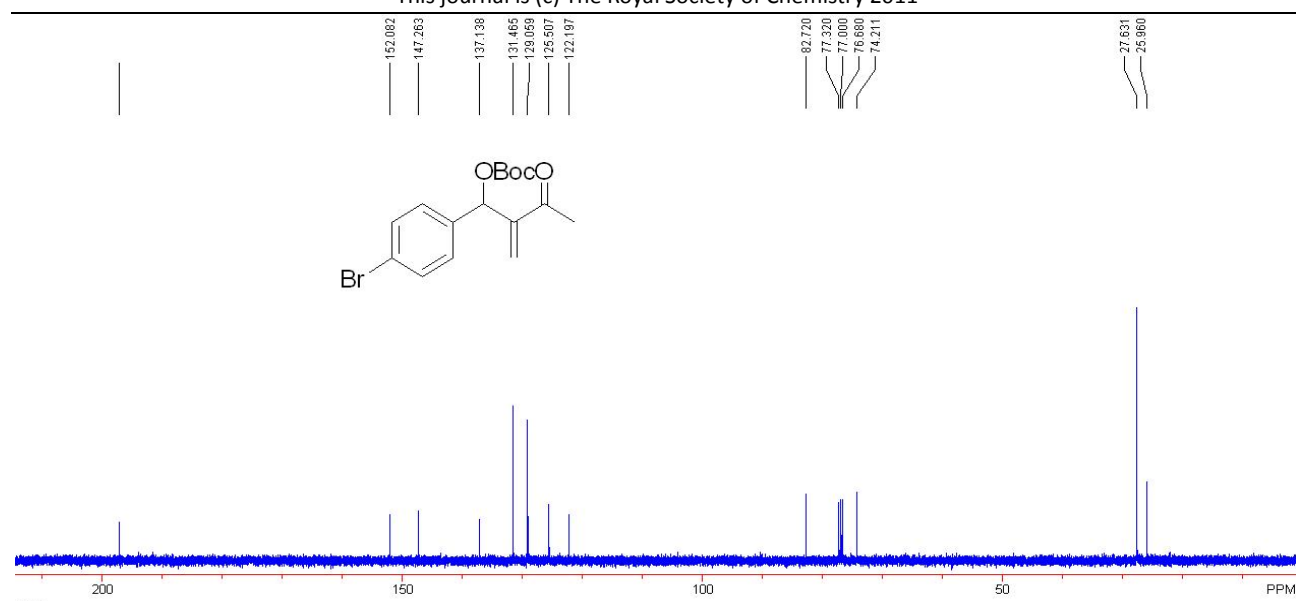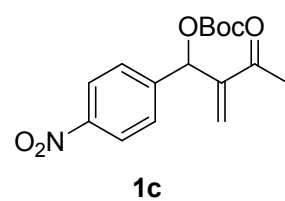

tert-butyl 2-methylene-1-(4-nitrophenyl)-3-oxobutyl carbonate **1c**: a white solid; yield: 87%; m.p. 112-115 °C;  $^1\text{H}$  NMR (400 MHz,  $\text{CDCl}_3$ , TMS)  $\delta$  8.19-8.17 (m, 2H), 7.62-7.59 (m, 2H), 6.61 (s, 1H), 6.33 (s, 1H), 6.27 (s, 1H), 2.35 (s, 3H), 1.47 (s, 9H);  $^{13}\text{C}$  NMR (100 MHz,  $\text{CDCl}_3$ ):  $\delta$  197.0, 151.9, 147.5, 146.7, 145.4, 128.1, 126.4, 123.5, 83.1, 73.6, 27.5, 25.8. IR (neat)  $\nu$  3478, 3341, 3112, 2982, 2936, 1747, 1681, 1608, 1526, 1370, 1252, 1156, 1086, 975, 853  $\text{cm}^{-1}$ ; MS (ESI)  $m/e$  344 ( $\text{M}+\text{Na}$ ); HRMS (ESI) for  $\text{C}_{16}\text{H}_{19}\text{NNaO}_6$  ( $\text{M}+\text{Na}$ ): 344.1105; Found: 344.1105.

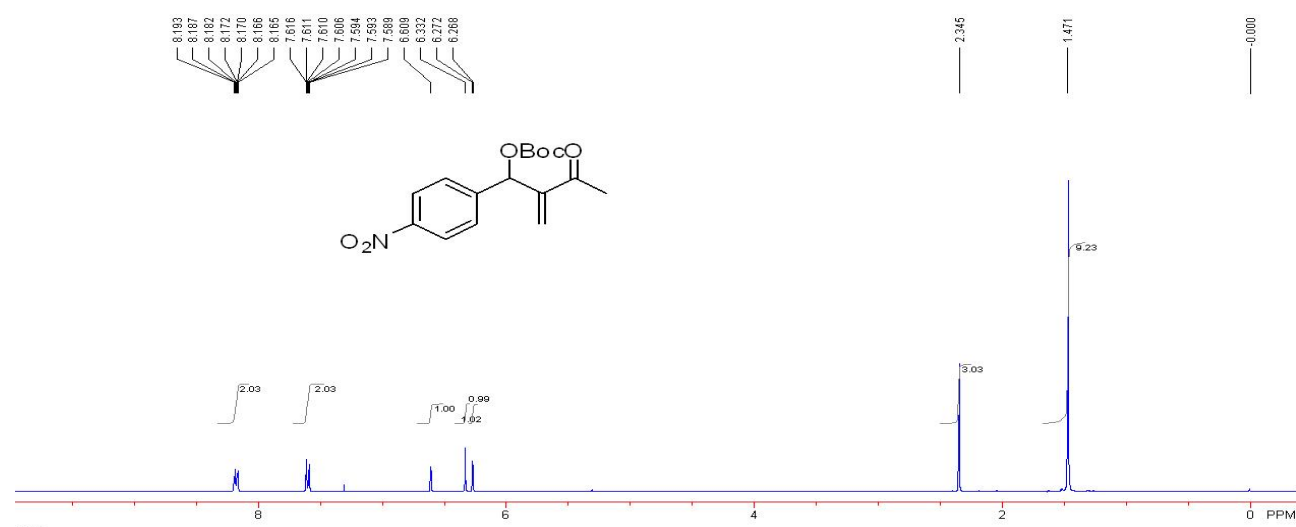

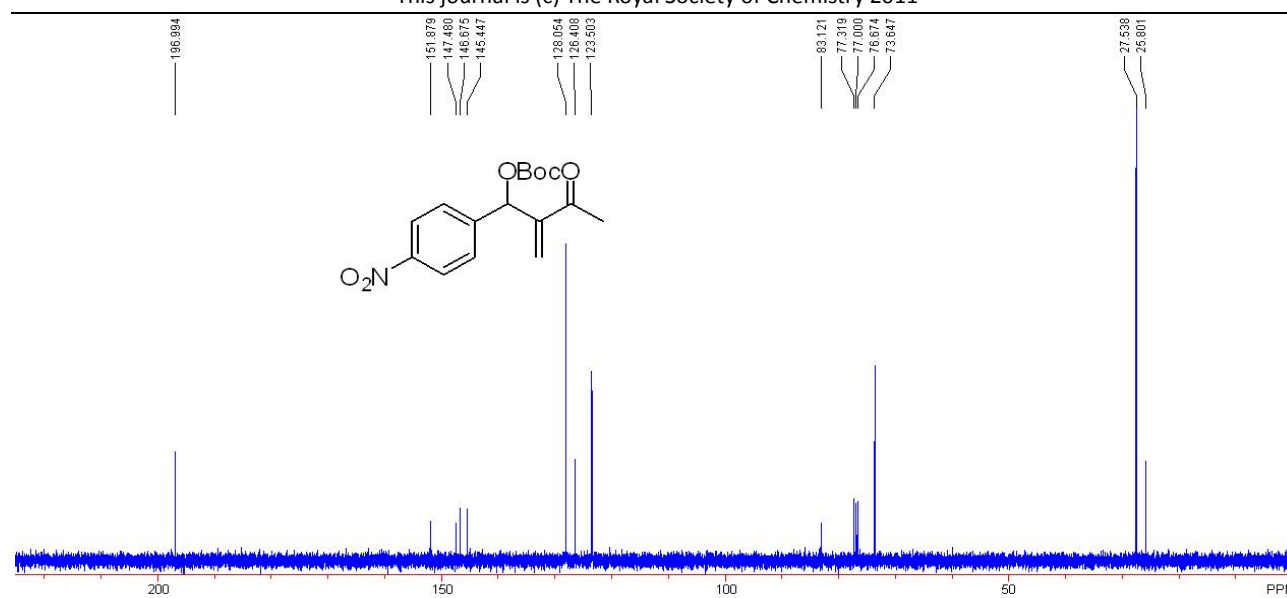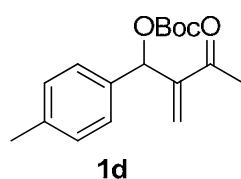

tert-butyl 2-methylene-3-oxo-1-p-tolylbutyl carbonate **1d**: a white solid; yield: 57%; m.p. 79-82 °C; <sup>1</sup>H NMR (400 MHz, CDCl<sub>3</sub>, TMS) δ 7.27 (d, *J* = 8.0 Hz, 2H), 7.12 (d, *J* = 8.0 Hz, 2H), 6.53 (s, 1H), 6.20 (s, 1H), 6.12 (s, 1H), 2.31 (s, 3H), 2.30 (s, 3H), 1.45 (s, 9H); <sup>13</sup>C NMR (100 MHz, CDCl<sub>3</sub>) δ 197.2, 152.3, 147.7, 137.9, 134.9, 129.0, 127.3, 125.5, 82.3, 74.9, 27.6, 26.0, 21.0; IR (neat) ν 3476, 3348, 2981, 2932, 1745, 1682, 1515, 1370, 1276, 1160, 1083, 973, 884 cm<sup>-1</sup>; MS (ESI) *m/e* 313 (M+Na); HRMS (ESI) for C<sub>17</sub>H<sub>22</sub>NaO<sub>4</sub> (M+Na): 313.1410; Found: 313.1414.

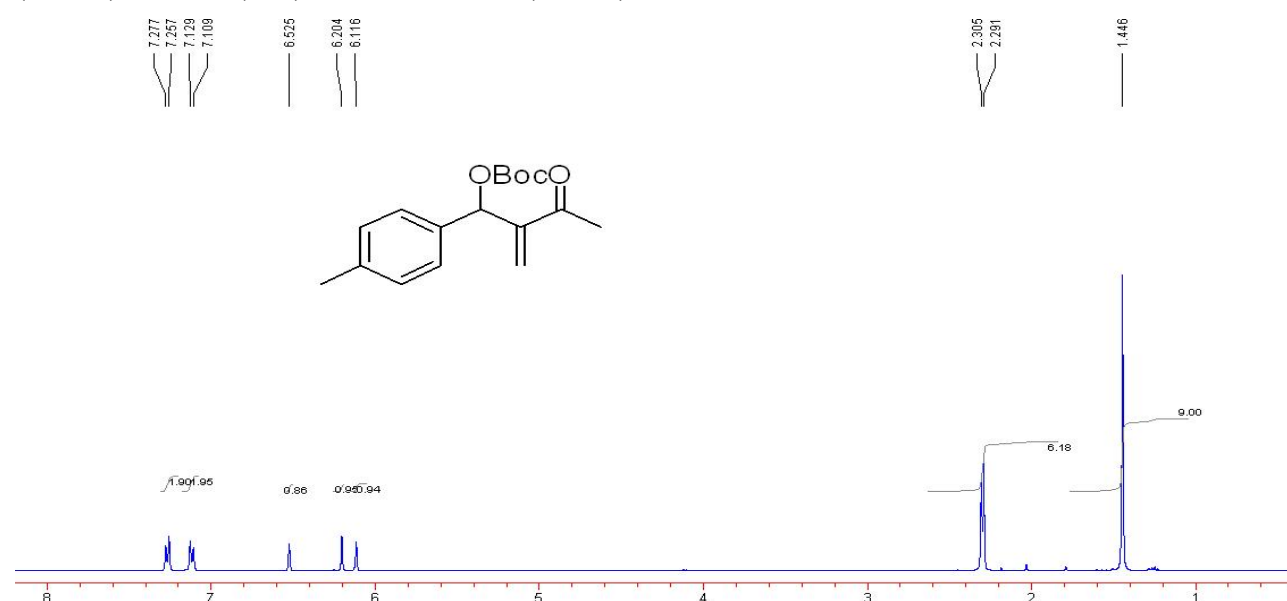

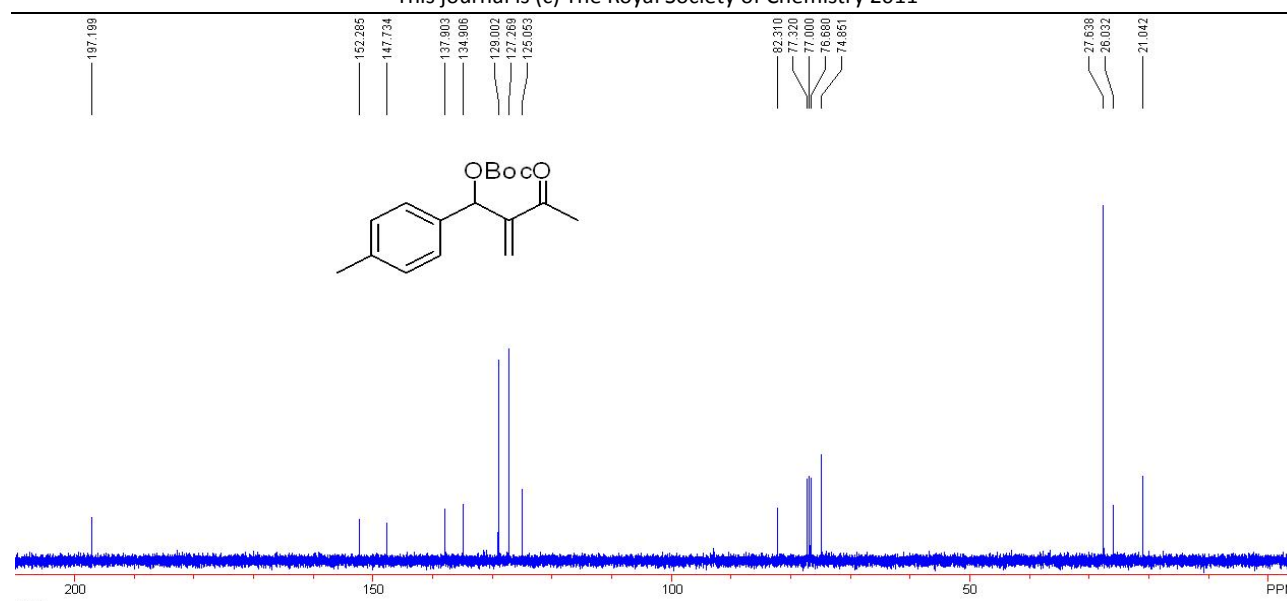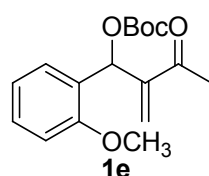

tert-butyl 1-(2-methoxyphenyl)-2-methylene-3-oxobutyl carbonate **1e**: a white solid. yield: 52%; m.p 119-121 °C;  $^1\text{H}$  NMR (400 MHz,  $\text{CDCl}_3$ , TMS)  $\delta$  7.30-7.25 (m, 2H), 6.94-6.88 (m, 2H), 6.87 (d, 1H,  $J = 8.4$  Hz), 6.22 (s, 1H), 5.82 (d,  $J = 1.2$  Hz, 1H), 3.82 (s, 3H), 2.36 (s, 3H), 2.30 (s, 3H), 1.47 (s, 9H);  $^{13}\text{C}$  NMR (100 MHz,  $\text{CDCl}_3$ ):  $\delta$  197, 156.7, 152.5, 147.0, 129.4, 127.3, 126.7, 126.2, 120.4, 110.8, 82.3, 69.9, 55.5, 27.7, 26.3; IR ( $\text{CH}_2\text{Cl}_2$ )  $\nu$  2982, 1738, 1674, 1634, 1602, 1495, 1467, 1392, 1368, 1272, 1243, 1080, 985, 961, 942, 872  $\text{cm}^{-1}$ ; MS (EI)  $m/z$  (%) 306.(2.61) ( $\text{M}^+$ ), 250 (6.02), 206 (41.08), 205 (94.30), 189 (23.01), 175 (35.34), 145 (23.06), 131 (36.81), 121 (13.11), 97 (28.71), 77 (19.60), 57 (87.43), 43 (100); HRMS (EI) Calcd for  $\text{C}_{17}\text{H}_{22}\text{O}_5$  ( $\text{M}^+$ ) requires 306.1467, Found 306.1460.

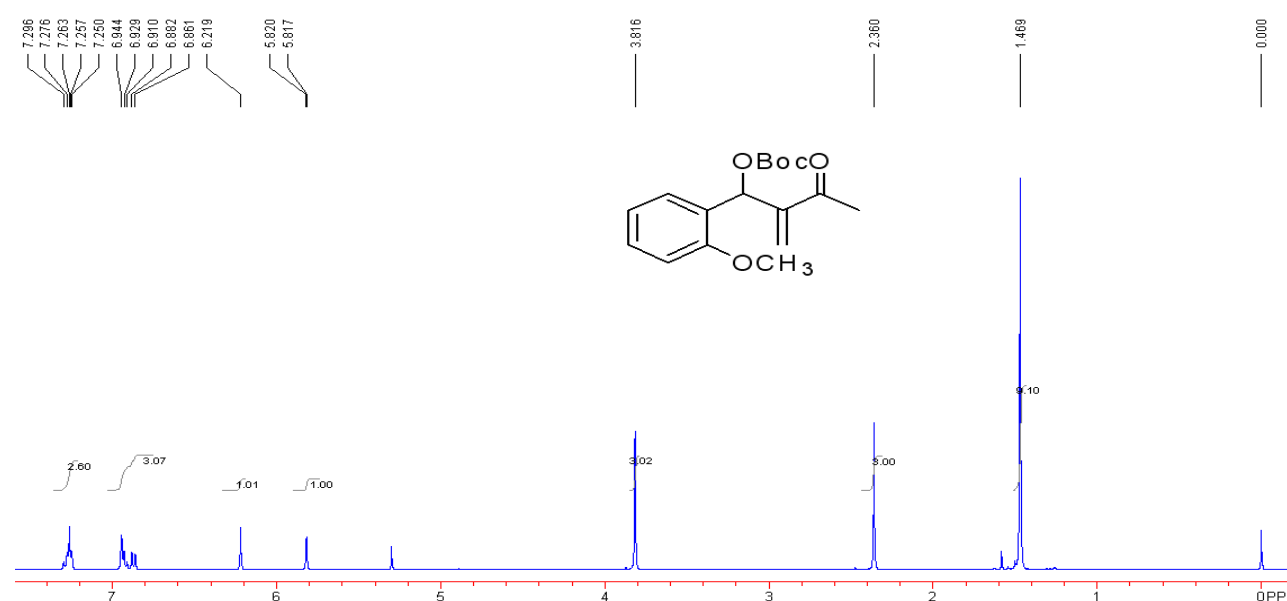

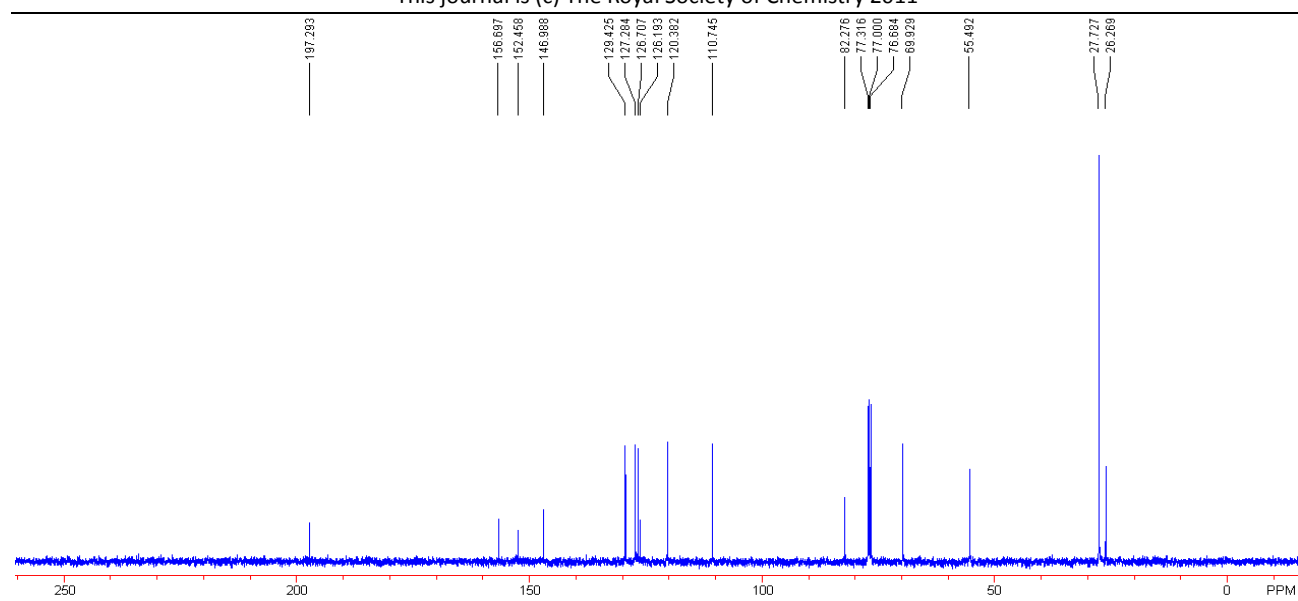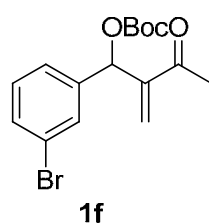

1-(3-bromophenyl)-2-methylene-3-oxobutyl tert-butyl carbonate **1f**: a white solid; yield: 52%; m.p. 100-103 °C;  $^1\text{H}$  NMR (400 MHz,  $\text{CDCl}_3$ , TMS)  $\delta$  7.52-7.51 (m, 1H), 7.42-7.39 (m, 1H), 7.34 (d,  $J = 8.0$  Hz, 1H), 7.19 (t,  $J = 8.0$  Hz, 1H), 6.50 (s, 1H), 6.25 (s, 1H), 6.17 (d,  $J = 1.2$  Hz, 1H), 2.33 (s, 3H), 1.46 (s, 9H);  $^{13}\text{C}$  NMR (100 MHz,  $\text{CDCl}_3$ )  $\delta$  197.1, 152.1, 147.2, 140.3, 131.3, 130.2, 130.0, 126.3, 125.8, 122.4, 82.9, 74.1, 27.7, 26.0; IR (neat)  $\nu$  2981, 2927, 1746, 1681, 1573, 1475, 1370, 1280, 1159, 1085, 971, 789  $\text{cm}^{-1}$ ; MS (ESI)  $m/e$  377 ( $\text{M}+\text{Na}$ ); HRMS (ESI) for  $\text{C}_{16}\text{H}_{19}\text{BrNaO}_4$  ( $\text{M}+\text{Na}$ ): 377.0359; Found: 377.0354.

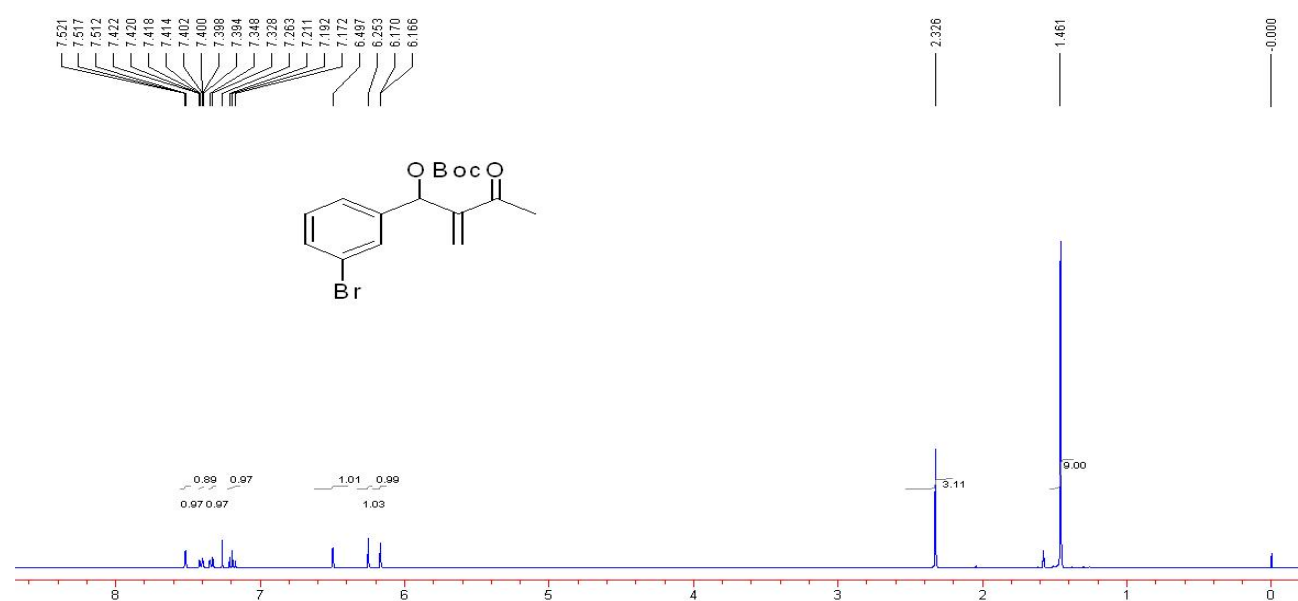

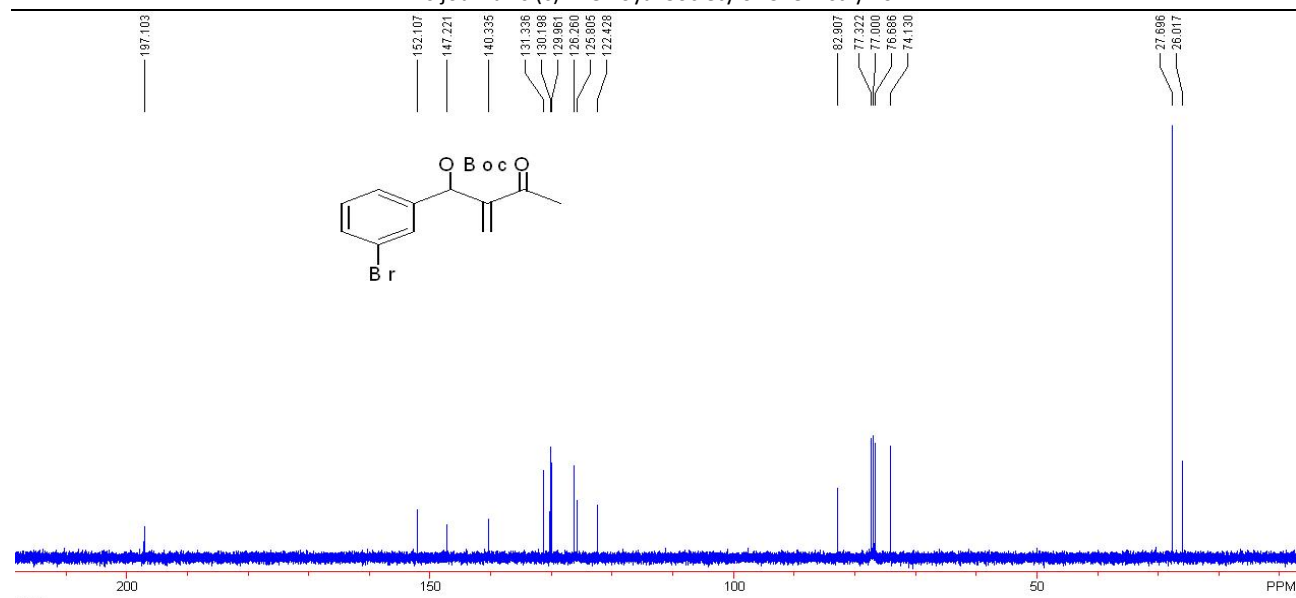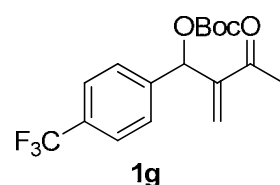

tert-butyl 2-methylene-3-oxo-1-(4-(trifluoromethyl)phenyl)butyl carbonate **1g**: a white solid; yield: 45%; m.p. 89-93 °C;  $^1\text{H}$  NMR (400 MHz,  $\text{CDCl}_3$ , TMS)  $\delta$  7.58 (d,  $J = 8.8$  Hz, 2H), 7.53 (d,  $J = 8.8$  Hz, 2H), 6.59 (s, 1H), 6.27 (s, 1H), 6.20 (s, 1H), 2.32 (s, 3H), 1.46 (s, 9H);  $^{13}\text{C}$  NMR (100 MHz,  $\text{CDCl}_3$ ):  $\delta$  197, 152.1, 147.1, 142.2 (d,  $J_{\text{C-F}} = 1.2$  Hz), 130.2 (q,  $J_{\text{C-F}} = 32.4$  Hz), 127.5, 125.9, 125.3 (q,  $J_{\text{C-F}} = 4.0$  Hz), 123.9 (q,  $J_{\text{C-F}} = 271.0$  Hz), 82.8, 74.1, 27.5;  $^{19}\text{F}$  NMR ( $\text{CDCl}_3$ , 376 MHz,  $\text{CFCl}_3$ ):  $\delta$  -62.7. IR (neat)  $\nu$  2983, 2936, 1748, 1682, 1608, 1421, 1371, 1277, 1165, 1068, 974, 853  $\text{cm}^{-1}$ ; MS (ESI)  $m/e$  367 (M+Na); HRMS (ESI) for  $\text{C}_{17}\text{H}_{19}\text{F}_3\text{NaO}_4$  (M+Na): 367.1128; Found: 367.1126.

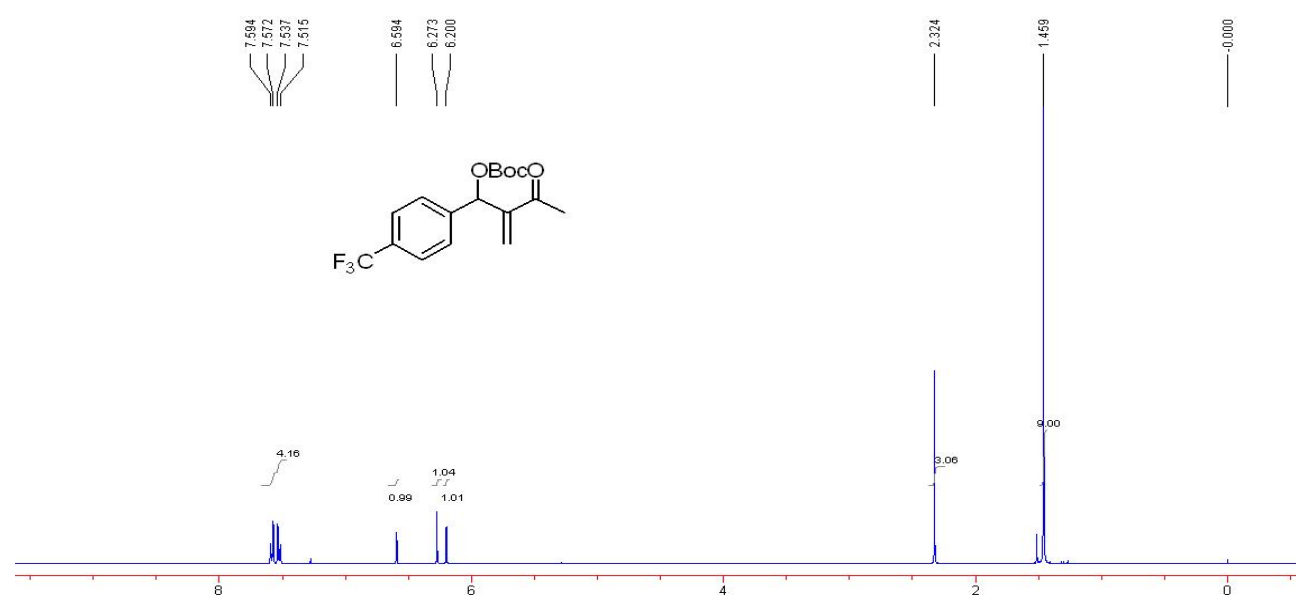



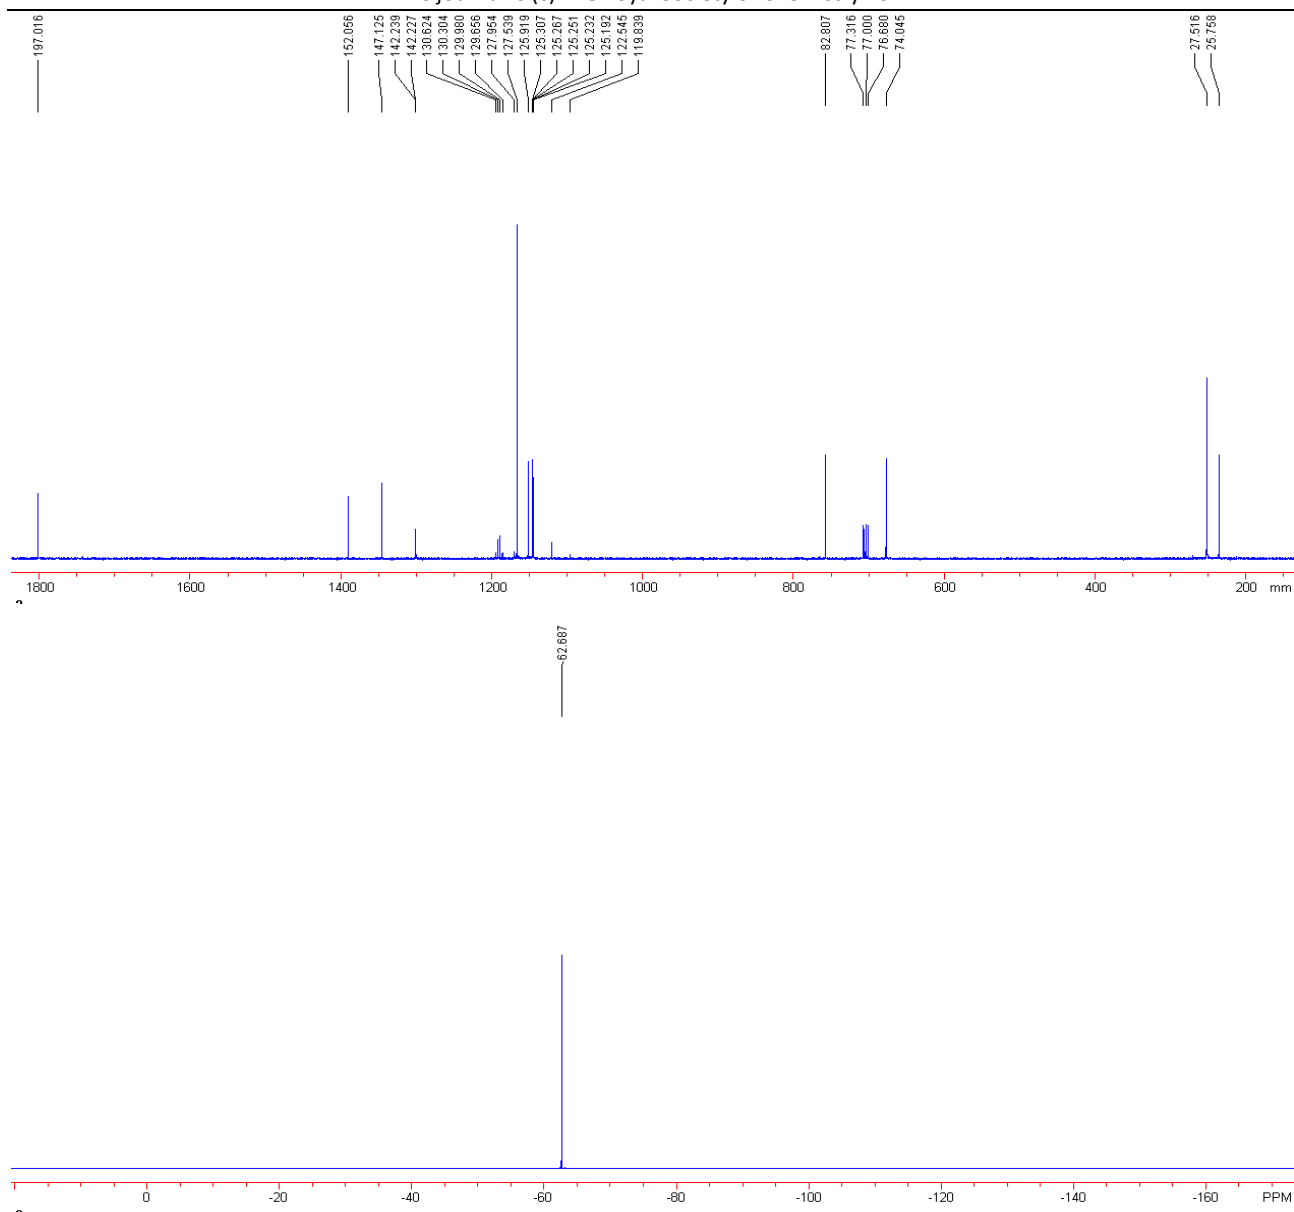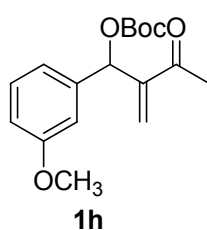

tert-butyl 1-(3-methoxyphenyl)-2-methylene-3-oxobutyl carbonate **1h**: a colorless oil. yield: 75%;  $^1\text{H}$  NMR (400 MHz,  $\text{CDCl}_3$ , TMS)  $\delta$  7.23 (t,  $J = 7.6$  Hz, 1H), 6.98-6.95 (m, 1H), 6.92-6.91 (m, 1H), 6.83-6.81 (m, 1H), 6.54 (s, 1H), 6.22 (s, 1H), 6.10 (d,  $J = 1.2$  Hz, 1H), 3.78 (s, 3H), 2.32 (s, 3H), 1.46 (s, 9H);  $^{13}\text{C}$  NMR (100 MHz,  $\text{CDCl}_3$ )  $\delta$  197.2, 159.5, 152.3, 147.6, 139.5, 129.4, 125.7, 119.6, 113.7, 112.8, 82.5, 74.7, 55.2, 27.7, 26.1; IR ( $\text{CH}_2\text{Cl}_2$ )  $\nu$  2977, 2937, 1741, 1679, 1460, 1394, 1369, 1305, 1274, 1251, 1161, 1089, 1045, 942, 898  $\text{cm}^{-1}$ ; MS (EI)  $m/z$  (%) 306.(6.86) [ $\text{M}^+$ ], 250 (4.51), 206 (42.71), 205 (55.37), 189 (16.61), 175 (59.06), 163 (6.09), 145 (10.07), 135 (11.34), 121 (20.08), 103 (15.47), 84 (11.10), 77 (13.19), 57 (100), 43 (87.19); HRMS (EI) Calcd for  $\text{C}_{17}\text{H}_{22}\text{O}_5$  [ $\text{M}^+$ ] requires 306.1467, Found 306.1462.

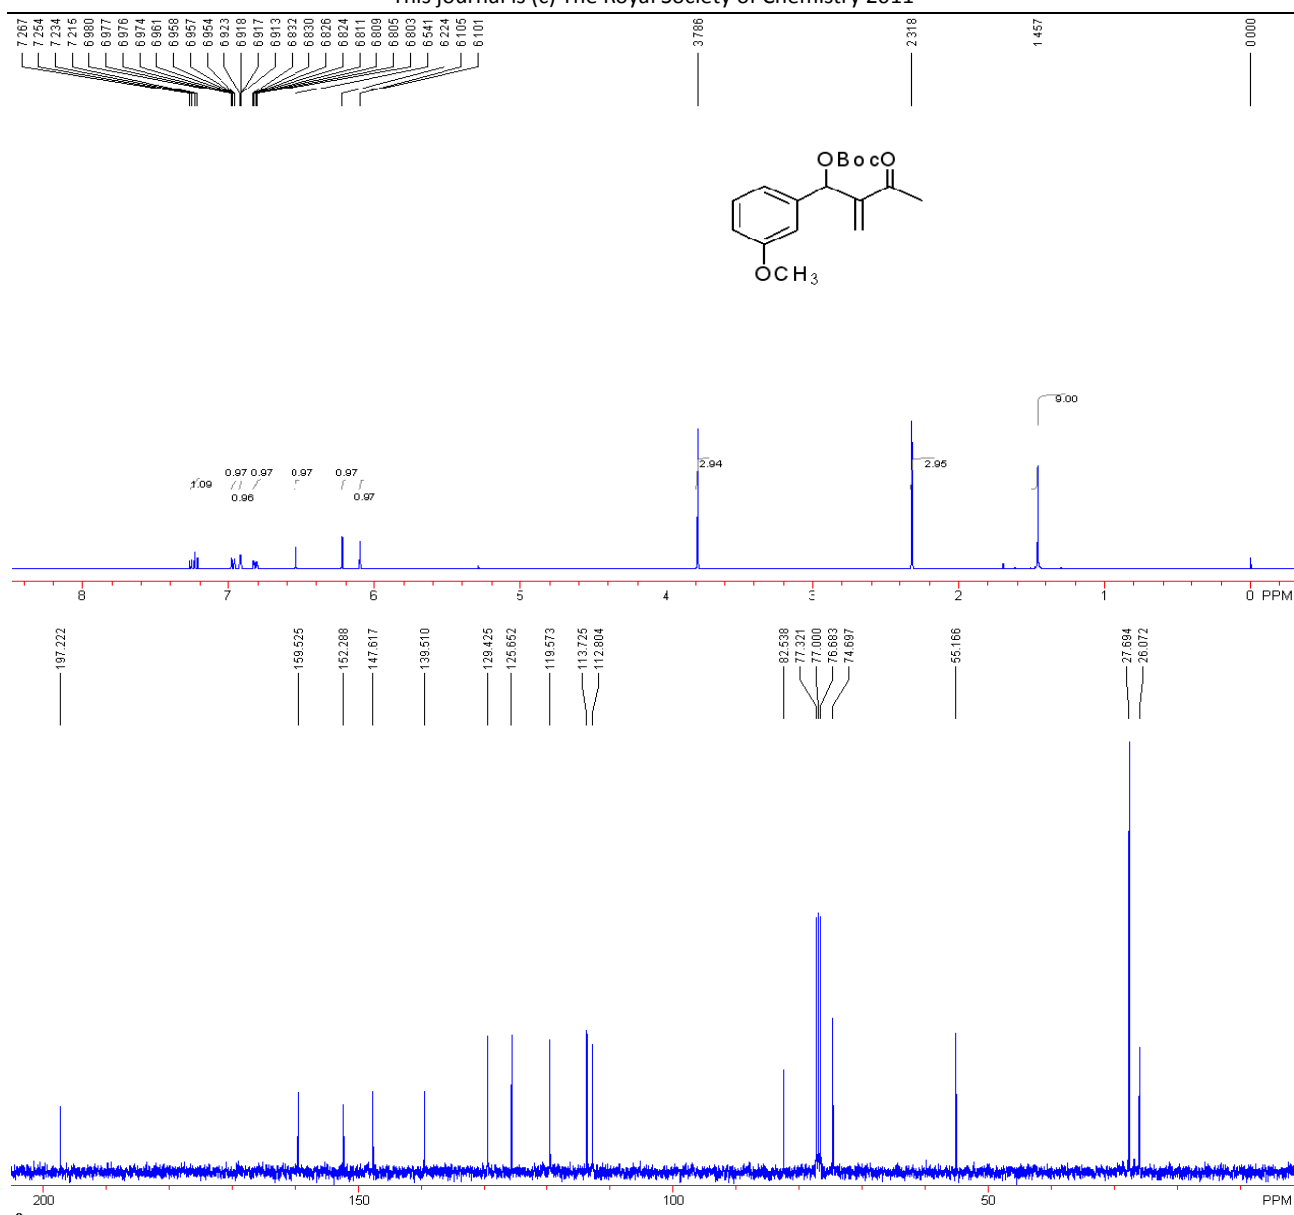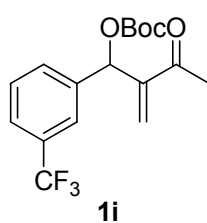

tert-butyl 2-methylene-3-oxo-1-(3-(trifluoromethyl)phenyl)butyl carbonate **1i**: a white solid; yield: 61%; m.p. 48-49 °C; <sup>1</sup>H NMR (400 MHz, CDCl<sub>3</sub>, TMS) δ 7.61 (t, *J* = 8.4 Hz, 2H), 7.54 (d, *J* = 7.6 Hz, 1H), 7.45 (t, *J* = 7.6 Hz, 1H), 6.59 (s, 1H), 6.28 (s, 1H), 6.20 (s, 1H), 2.33 (s, 3H), 1.46 (s, 9H); <sup>13</sup>C NMR (100 MHz, CDCl<sub>3</sub>): δ 197, 152.1, 147.1, 139.2, 131.0, 130.7 (q, *J*<sub>C-F</sub> = 32.0 Hz), 128.9, 128.0, 125.9, 125.0 (q, *J*<sub>C-F</sub> = 3.7 Hz), 123.91 (q, *J*<sub>C-F</sub> = 3.7 Hz), 123.90 (q, *J*<sub>C-F</sub> = 270.7 Hz), 83.0, 74.2, 27.6; <sup>19</sup>F NMR (CDCl<sub>3</sub>, 376 MHz, CFCl<sub>3</sub>): δ -62.6; IR (neat) ν 2983, 2972, 1749, 1675, 1327, 1285, 1272, 1251, 1160, 1119, 1072, 971, 956, 847 cm<sup>-1</sup>; MS (ESI) *m/e* 367 (M+Na); HRMS (ESI) for C<sub>17</sub>H<sub>19</sub>F<sub>3</sub>NaO<sub>4</sub> (M+Na): 367.1128; Found: 367.1130.

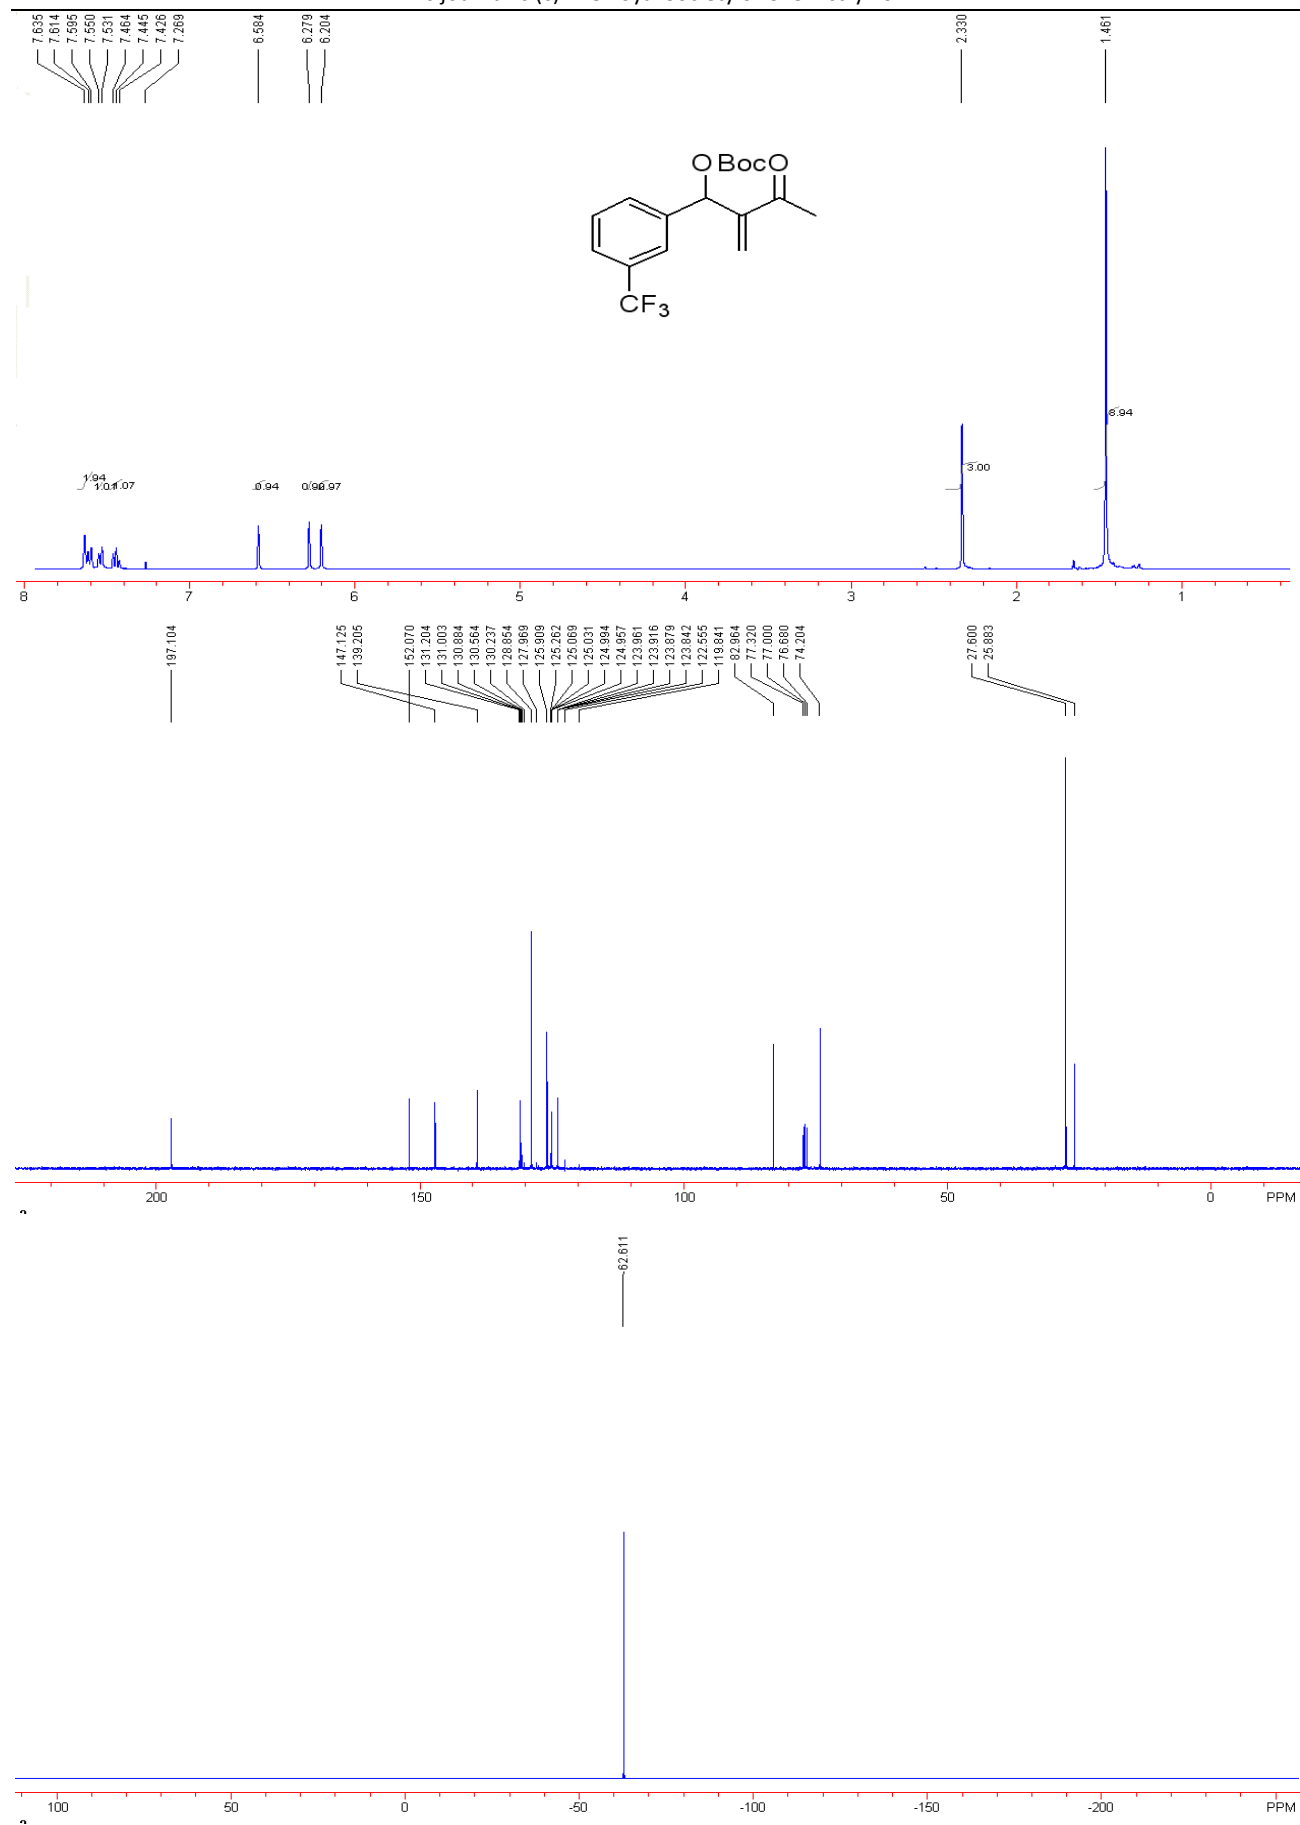

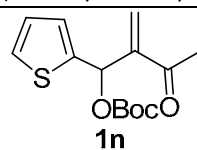

tert-butyl 2-methylene-3-oxo-1-(thiophen-2-yl)butyl carbonate **1n**: a white solid. yield: 32%;  $^1\text{H}$  NMR (400 MHz,  $\text{CDCl}_3$ , TMS)  $\delta$  7.27-7.25 (m, 1H), 7.08-7.07 (m, 1H), 6.94 (dd,  $J_1 = 5.2$ ,  $J_2 = 3.6$ , 1H), 6.81 (s, 1H), 6.27 (s, 1H), 6.26 (d,  $J = 1.2$  Hz, 1H), 2.35 (s, 3H), 1.47 (s, 9H);  $^{13}\text{C}$  NMR (100 MHz,  $\text{CDCl}_3$ )  $\delta$  196.9, 152.1, 147.3, 140.7, 127.1, 126.8, 126.1, 125.2, 82.8, 70.2, 27.7, 26.0; IR ( $\text{CH}_2\text{Cl}_2$ )  $\nu$  2978, 2926, 1736, 1631, 1431, 1393, 1370, 1316, 1344, 1299, 1252, 1155, 1076, 1043, 962, 923, 868, 847  $\text{cm}^{-1}$ ; MS (EI)  $m/z$  (%) 306.(6.86) [ $\text{M}^+$ ], 250 (4.51), 206 (42.71), 205 (55.37), 189 (16.61), 175 (59.06), 163 (6.09), 145 (10.07), 135 (11.34), 121 (20.08), 103 (15.47), 84 (11.10), 77 (13.19), 57 (100), 43 (87.19); MS (ESI)  $m/e$  305 (M+Na); HRMS (ESI) for  $\text{C}_{14}\text{H}_{18}\text{NaO}_4\text{S}$  (M+Na): 305.0818; Found : 305.0821.

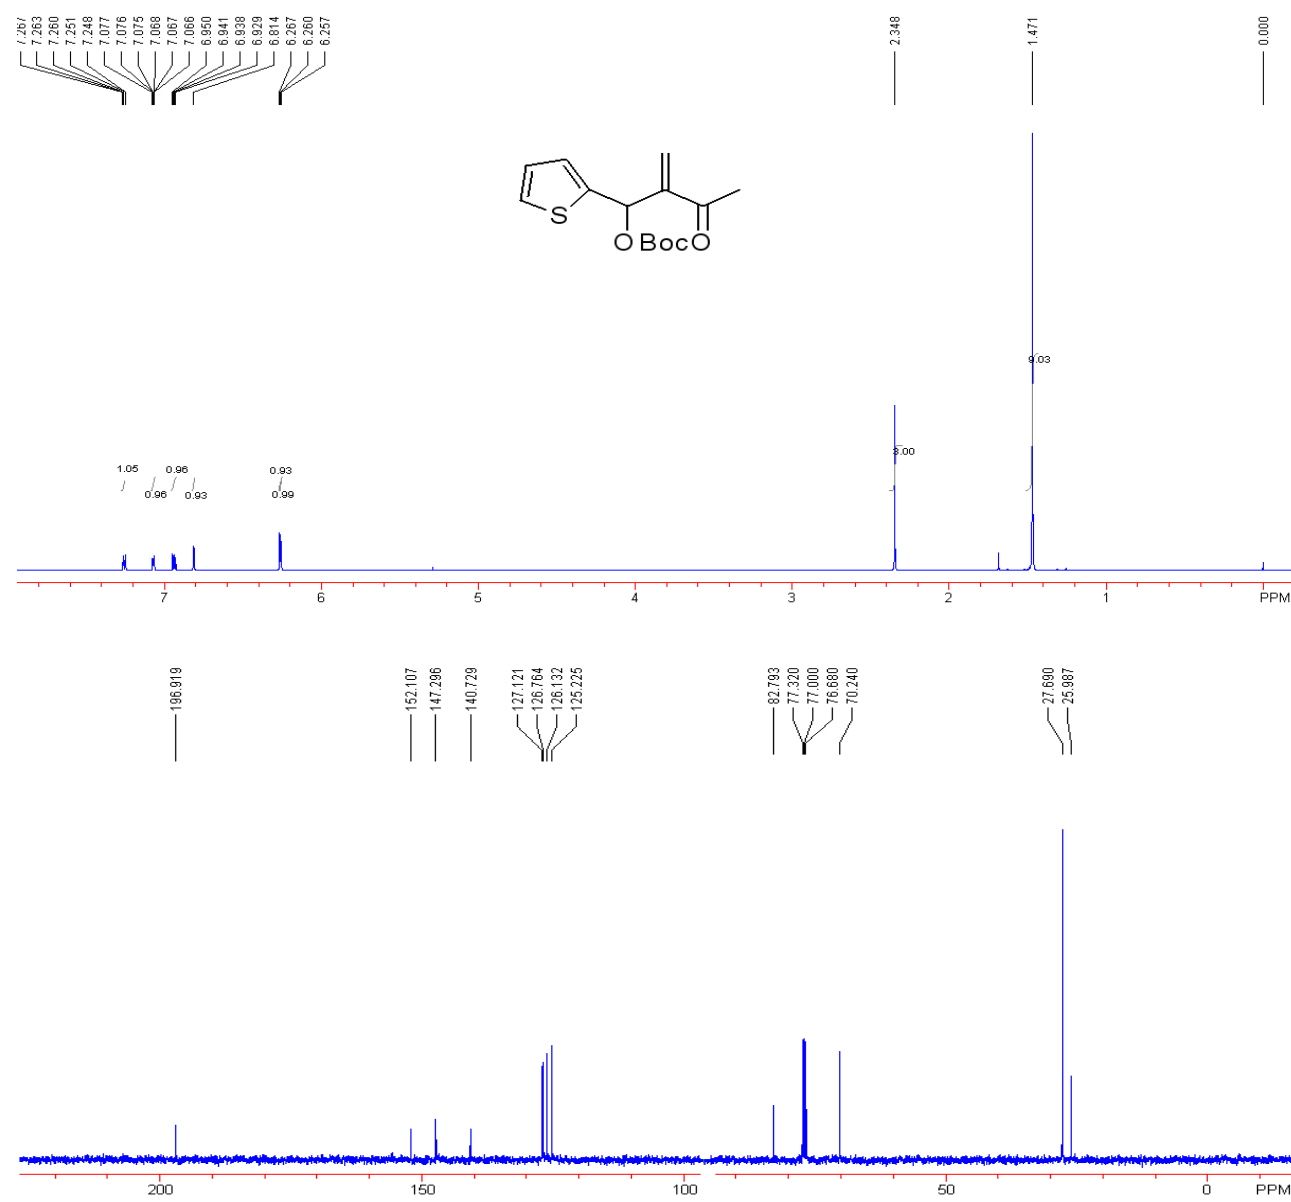

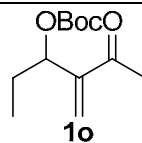

tert-butyl 1-(3-methoxyphenyl)-2-methylene-3-oxobutyl carbonate **1o**: a colorless oil. yield: 16%;  $^1\text{H}$  NMR (400 MHz,  $\text{CDCl}_3$ , TMS)  $\delta$  6.14 (s, 1H), 6.03 (d,  $J = 0.8$  Hz, 1H), 5.46-5.43 (m, 1H), 2.36 (s, 3H), 1.78-1.59 (m, 2H), 1.47 (s, 9H), 0.91 (t,  $J = 7.6$  Hz, 3H);  $^{13}\text{C}$  NMR (100 MHz,  $\text{CDCl}_3$ )  $\delta$  197.9, 152.8, 148.3, 124.7, 82.1, 74.9, 27.7, 27.6, 26.0, 9.7; IR ( $\text{CH}_2\text{Cl}_2$ )  $\nu$  2976, 1741, 1679, 1459, 1394, 1369, 1305, 1275, 1251, 1161, 1089, 1044, 942, 898  $\text{cm}^{-1}$ ; MS (ESI)  $m/e$  251 ( $\text{M}+\text{Na}$ ); HRMS (ESI) for  $\text{C}_{12}\text{H}_{20}\text{NaO}_4$  ( $\text{M}+\text{Na}$ ): 251.1254; Found: 251.1260.

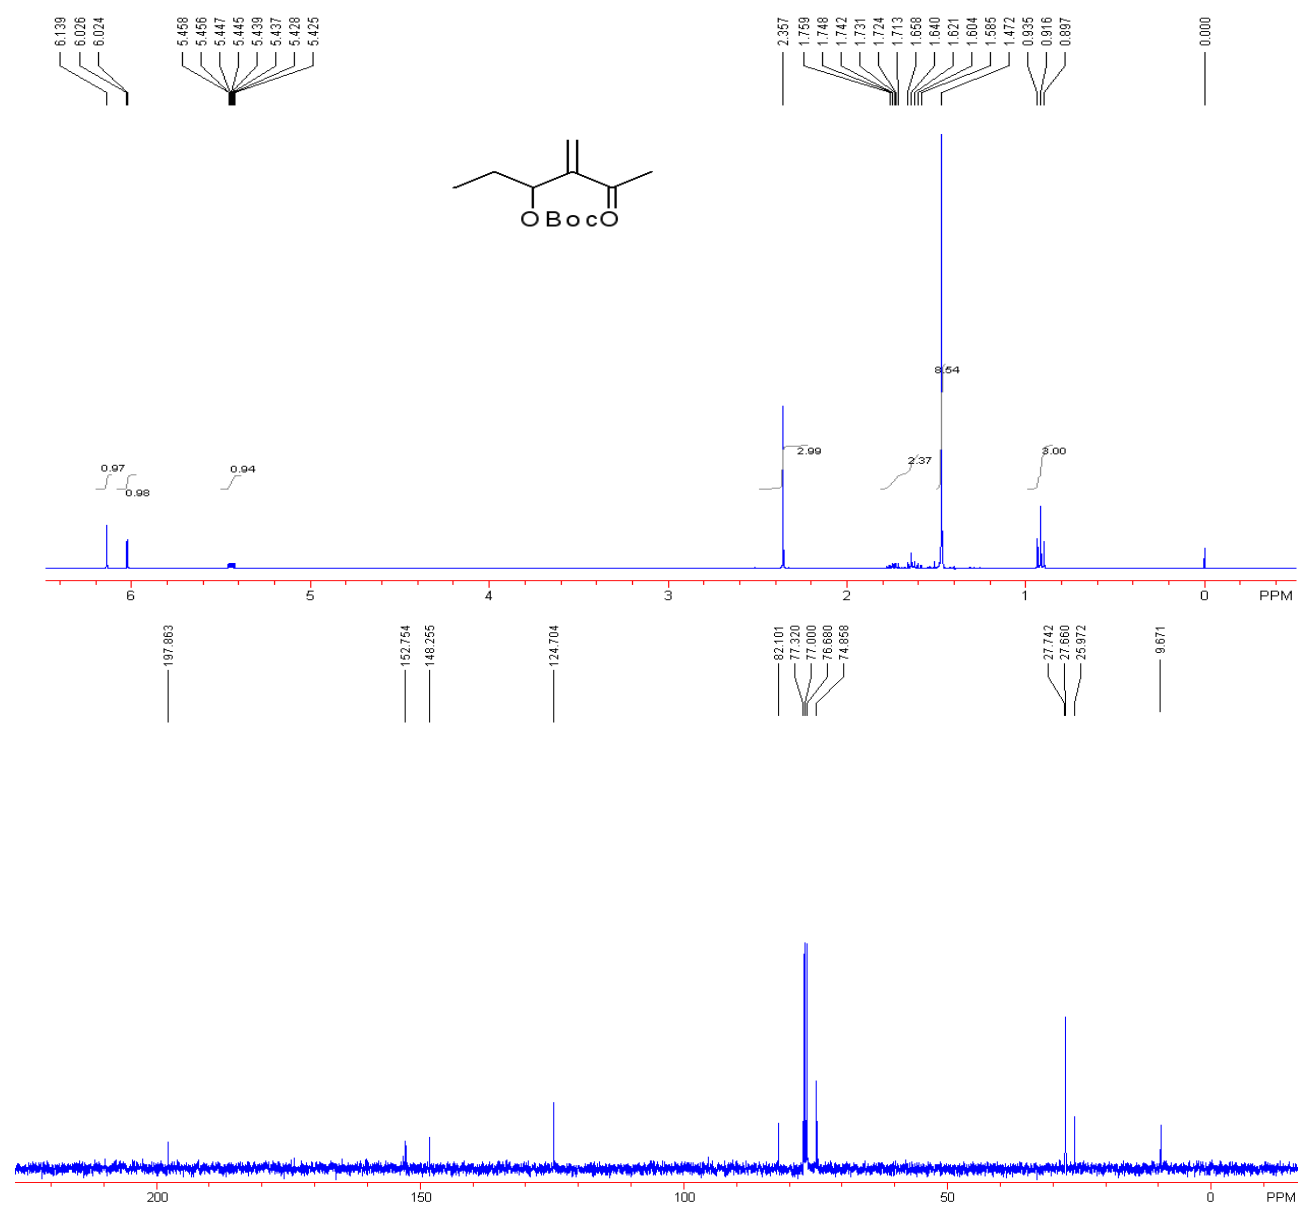

**General Procedure for the Preparation of 3 from the Reaction of 1a with 2a Using 3a as an Example in the Presence of L2**

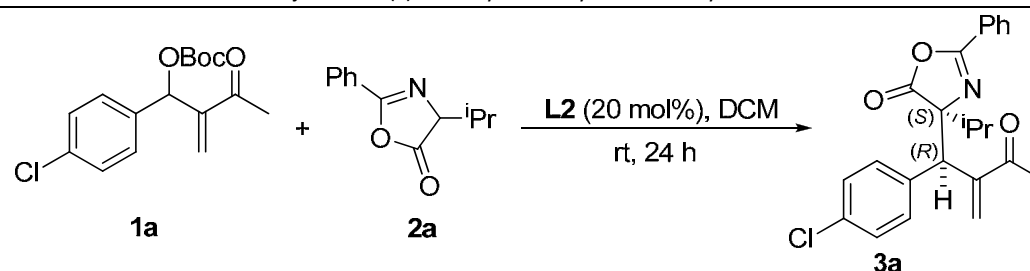

To a mixture of **1a** (0.11 mmol, 34 mg), **2a** (0.10 mmol, 21 mg) and catalyst **L2** (13 mg, 0.020 mmol) was added 1.0 mL of dichloromethane at room temperature (20 °C) under argon. The reaction solution was monitored by TLC. After the reaction complete, the solution was concentrated under reduced pressure and the residue was further purified by silica gel column chromatography (EtOAc/PE = 1/16) to give the target product **3a**.

Preparative thin layer chromatography was performed to obtain the pure *syn*-adduct for spectroscopic analyses (eluent: DCM/PE = 2/1).

**(S)-4-((R)-1-(4-chlorophenyl)-2-methylene-3-oxobutyl)-4-isopropyl-2-phenyloxazol-5(4H)-one**

**3a**: Following the general procedure, the *syn/anti* ratio (16:1) was determined by <sup>1</sup>H NMR spectroscopic analysis of the crude product (δ major 2.46 ppm, δ minor: 2.79 ppm). The mixture was purified by column chromatography using silica gel to give a mixture of diastereoisomer along with trace amount of impurity (34 mg, 86% overall yield in a diastereomeric ratio = 16:1). m.p. for *syn-3a* = 107-109 °C; [α]<sub>D</sub><sup>20</sup> (*syn-3a*) = -52.0 (c 0.5, CHCl<sub>3</sub>). IR (CH<sub>2</sub>Cl<sub>2</sub>): ν 2972, 1811, 1672, 1651, 1488, 1453, 1295, 1200, 1157, 1110, 1046, 1016, 961, 914, 887, 811, 783 cm<sup>-1</sup>; <sup>1</sup>H NMR (400 MHz, CDCl<sub>3</sub>, TMS) for *syn-3a*: δ 7.87 (2H, d, *J* = 6.8 Hz, Ph-H), 7.56 (1H, t, *J* = 7.6 Hz, Ph-H), 7.45 (2H, t, *J* = 7.6 Hz, Ph-H), 7.27 (1H, s, =CH<sub>2</sub>), 7.16 (2H, d, *J* = 8.4 Hz, Ar-H), 7.05 (2H, d, *J* = 8.4 Hz, Ar-H), 6.50 (1H, s, =CH<sub>2</sub>), 4.90 (1H, s, Ar-CH), 2.46 (1H, qu, *J* = 6.8 Hz, -CH(CH<sub>3</sub>)<sub>2</sub>), 2.32 (3H, s, COCH<sub>3</sub>), 1.10 (3H, d, *J* = 6.8 Hz, -CH(CH<sub>3</sub>)<sub>2</sub>), 0.81 (3H, d, *J* = 6.8 Hz, -CH(CH<sub>3</sub>)<sub>2</sub>); <sup>13</sup>C NMR (100 MHz, CDCl<sub>3</sub>) for *syn-3a*: δ 198.0, 177.9, 160.3, 145.9, 135.0, 133.3, 132.7, 131.5, 128.8, 128.7, 128.0, 127.8, 125.4, 79.8, 46.2, 32.3, 25.6, 17.5, 15.3; MS (EI(*syn-3a*)) *m/z* (%) 395 (1.86) [M<sup>+</sup>], 193 (35.40), 105 (84.48), 86 (51.69), 84 (82.05), 77 (32.57), 71 (8.47), 57 (11.35), 43 (100); HRMS (EI) Calcd for C<sub>23</sub>H<sub>22</sub>ClNO<sub>3</sub> [M<sup>+</sup>] requires 395.1292, Found 395.1288; The ee of the *syn*-diastereomer was determined to be 97% [determined by HPLC, Chiralpak AD-H, n-hexane/isopropanol = 90:10, 0.7 mL/min, λ = 230 nm, t (major) = 6.98 min, t (minor) = 8.57 min].

**<sup>1</sup>H NMR (400 MHz, CDCl<sub>3</sub>, TMS) for the crude product:**

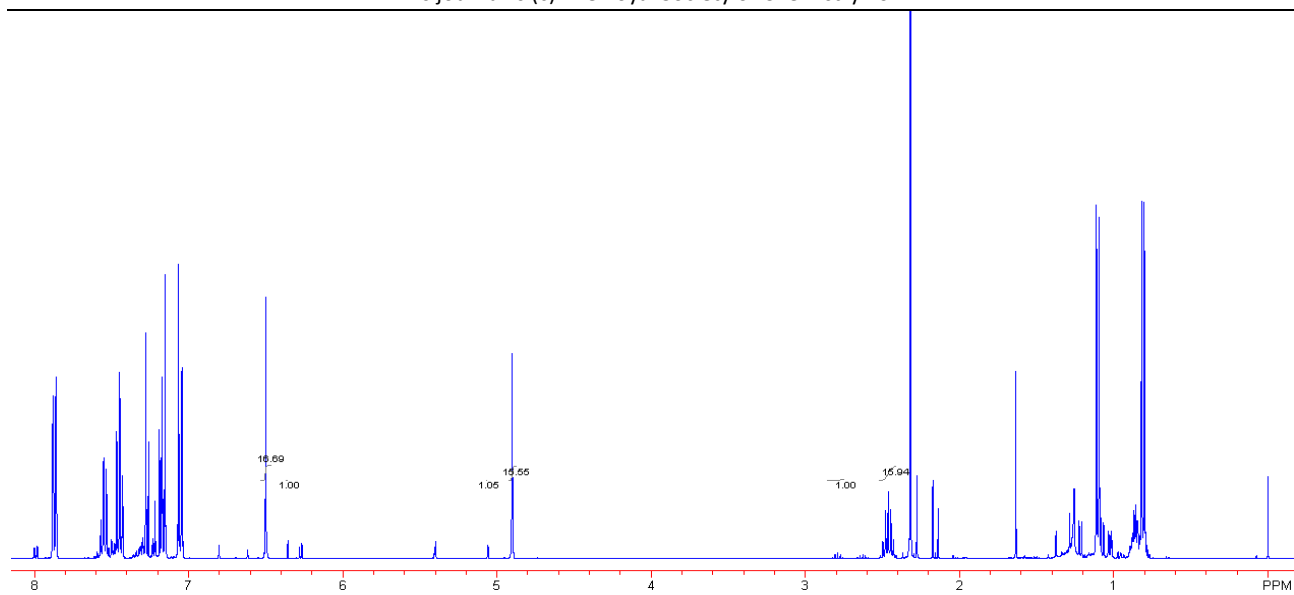

<sup>1</sup>H NMR (400 MHz, CDCl<sub>3</sub>, TMS) for the *syn*-diastereomer

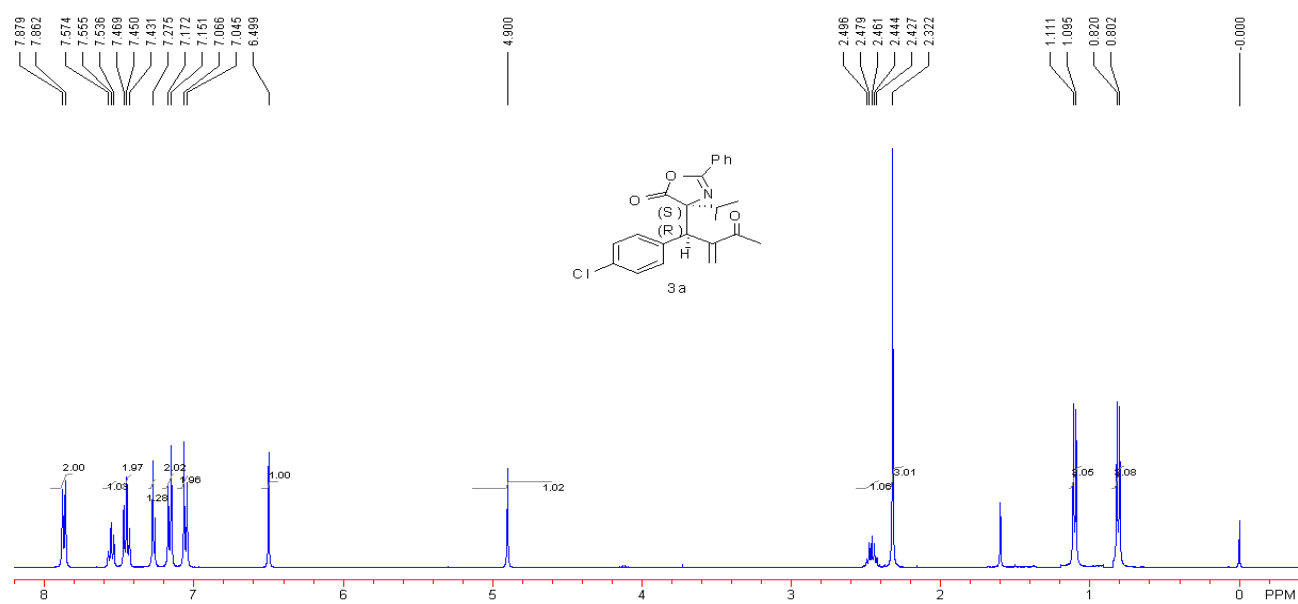

<sup>13</sup>C NMR (CDCl<sub>3</sub>, 100 MHz) for the *syn*-diastereomer

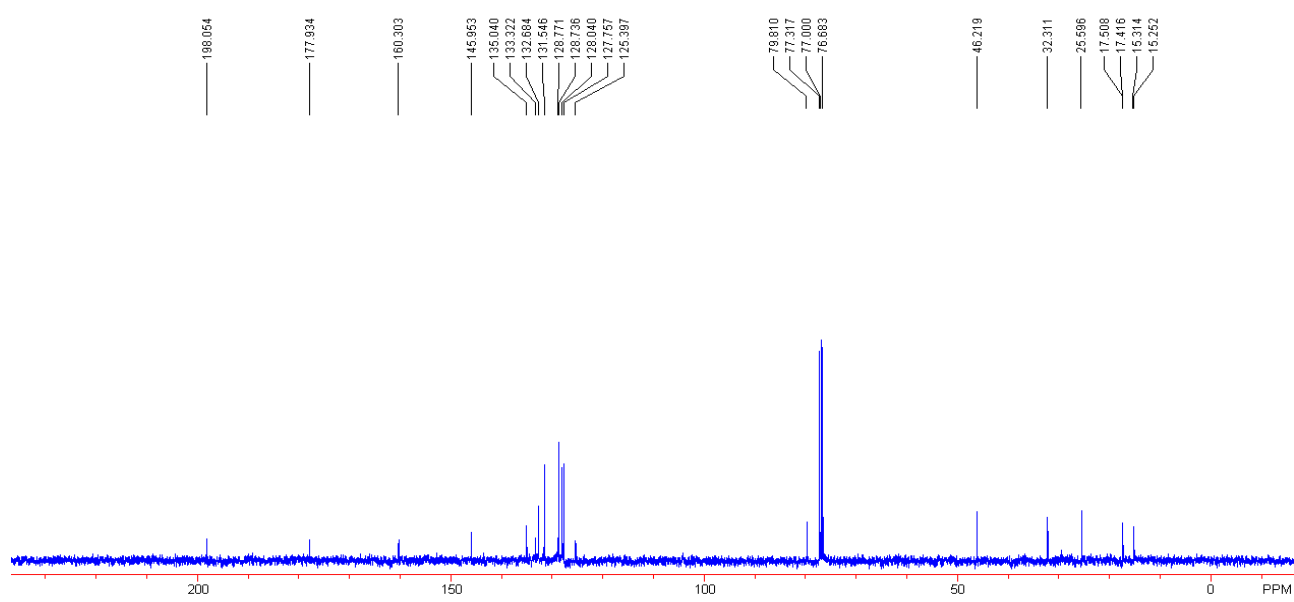

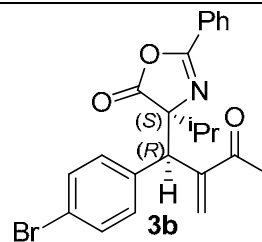

**(S)-4-((R)-1-(4-bromophenyl)-2-methylene-3-oxobutyl)-4-isopropyl-2-phenyloxazol-5(4H)-one**

**3b**: Following the general procedure, the *syn/anti* ratio (16:1) was determined by  $^1\text{H}$  NMR spectroscopic analysis of the crude product ( $\delta$  major: 2.46 ppm,  $\delta$  minor: 2.79 ppm). The mixture was purified by column chromatography using silica gel to give a mixture of diastereoisomer along with trace amount of impurity (36 mg, 82% overall yield in a diastereomeric ratio = 16:1); a white solid. m.p. for *syn-3b* = 103-105 °C;  $[\alpha]_D^{20}$  (*syn-3b*) = -42.5 (c 1.0,  $\text{CHCl}_3$ ). IR ( $\text{CH}_2\text{Cl}_2$ ):  $\nu$  2922, 1811, 1678, 1651, 1485, 1454, 1342, 1296, 1157, 1113, 1072, 1047, 1022, 1010, 964, 911, 884, 811, 784  $\text{cm}^{-1}$ ;  $^1\text{H}$  NMR (400MHz,  $\text{CDCl}_3$ , TMS) for *syn-3b*:  $\delta$  7.88-7.86 (2H, m, Ph-H), 7.57-7.52 (1H, m, Ph-H), 7.46-7.42 (2H, m, Ph-H), 7.28 (1H, s, =CH<sub>2</sub>), 7.21 (2H, d,  $J$  = 8.8 Hz, Ar-H), 7.10 (2H, d,  $J$  = 8.8 Hz, Ar-H), 6.50 (1H, s, =CH<sub>2</sub>), 4.89 (1H, s, Ar-CH), 2.46 (1H, qu,  $J$  = 6.8 Hz, -CH(CH<sub>3</sub>)<sub>2</sub>), 2.31 (3H, s, COCH<sub>3</sub>), 1.10 (3H, d,  $J$  = 6.8 Hz, -CH(CH<sub>3</sub>)<sub>2</sub>), 0.81 (3H, d,  $J$  = 6.8 Hz, -CH(CH<sub>3</sub>)<sub>2</sub>);  $^{13}\text{C}$  NMR ( $\text{CDCl}_3$ , 100 MHz) for *syn-3b*:  $\delta$  198.0, 177.9, 160.3, 145.9, 135.6, 132.9, 131.9, 130.9, 128.8, 128.7, 127.7, 125.3, 121.6, 79.7, 46.2, 32.3, 25.5, 17.5, 15.3; MS (EI(*syn-3b*))  $m/z$  (%) 439 (2.07) [ $\text{M}^+$ ], 239 (32.76), 237 (33.60), 202 (6.34), 158 (31.42), 115 (12.37), 105 (100.00), 77 (36.26), 43 (88.45); HRMS (EI) Calcd for  $\text{C}_{23}\text{H}_{22}\text{BrNO}_3$  [ $\text{M}^+$ ] requires 439.0783, Found 439.0785; The ee of the *syn*-diastereomer was determined to be 97% [determined by HPLC, Chiralpak AD-H, n-hexane/isopropanol = 90:10, 0.7 mL/min,  $\lambda$  = 230 nm, t (major) = 7.28 min, t (minor) = 8.61 min].

**$^1\text{H}$  NMR (400 MHz,  $\text{CDCl}_3$ , TMS) for the crude product:**

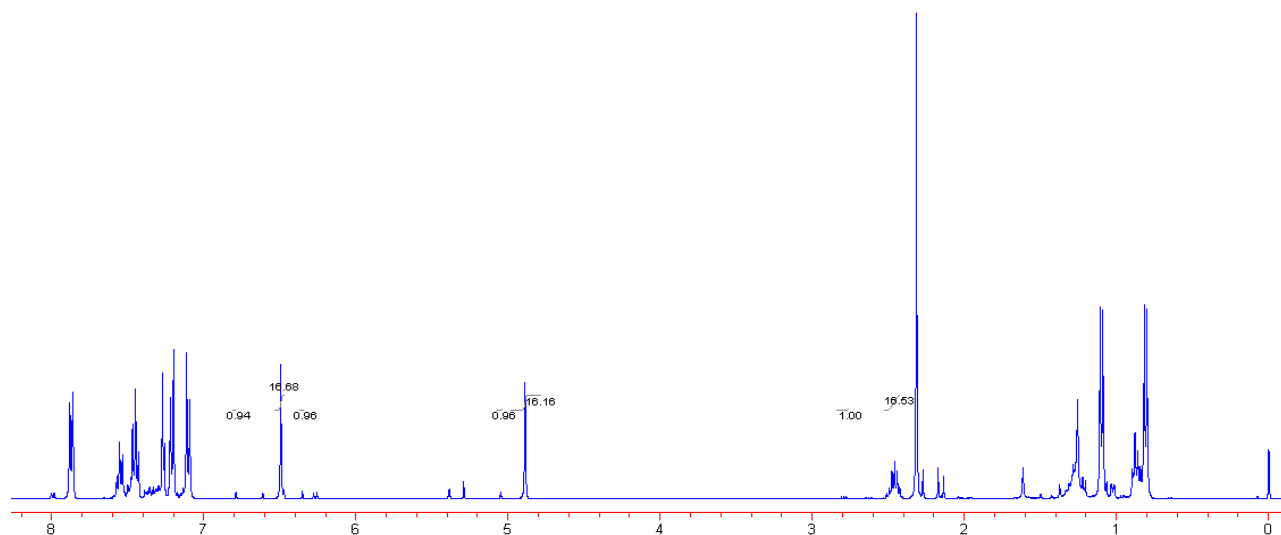

**$^1\text{H}$  NMR (400 MHz,  $\text{CDCl}_3$ , TMS) for the *syn*-diastereomer**



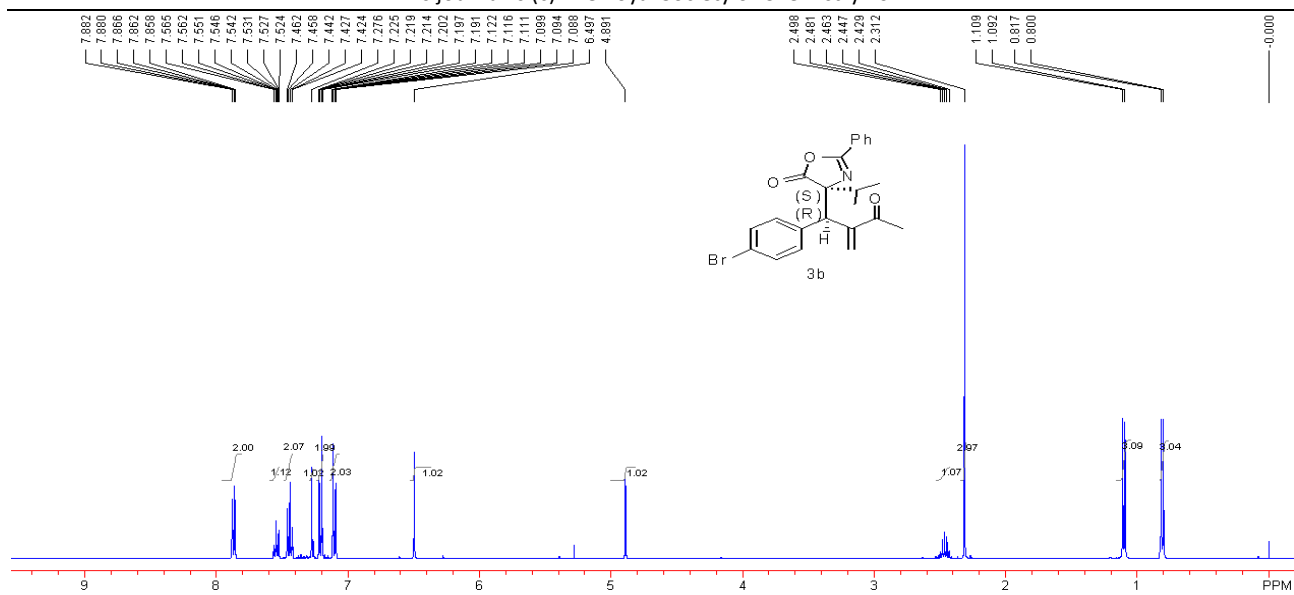<sup>13</sup>C NMR (CDCl<sub>3</sub>, 100 MHz) for the *syn*-diastereomer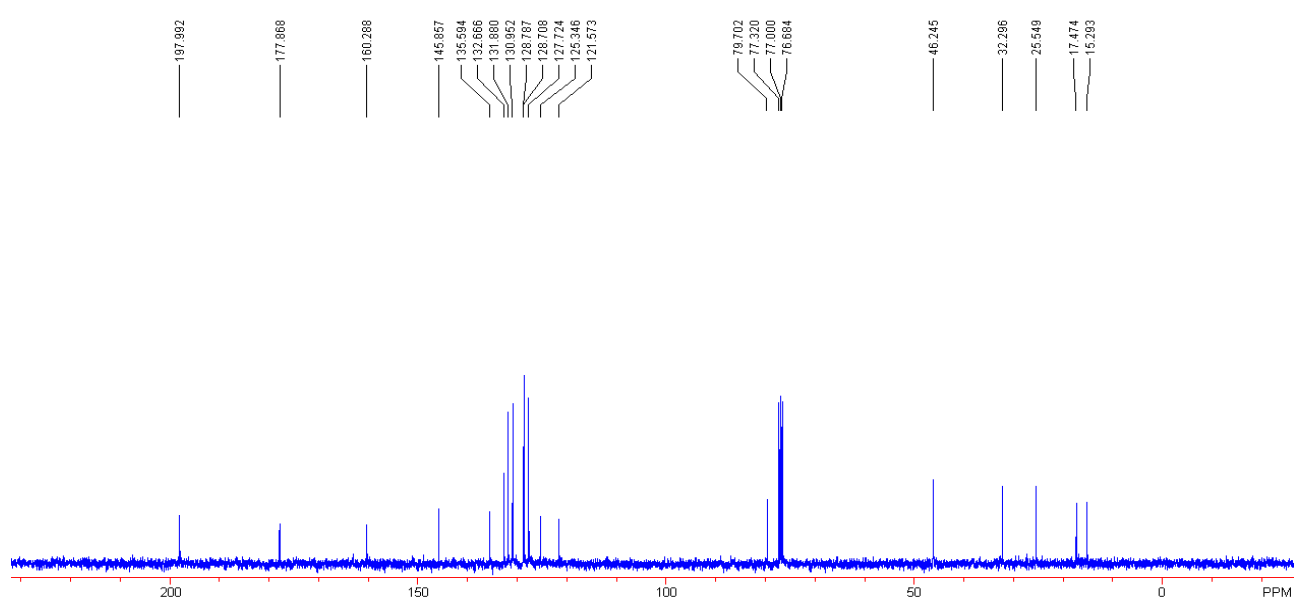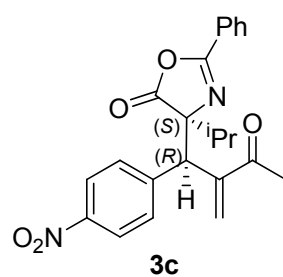**(S)-4-((R)-1-(4-nitrophenyl)-2-methylene-3-oxobutyl)-4-isopropyl-2-phenyloxazol-5(4H)-one 3c:**

Following the general procedure, the *syn/anti* ratio (4:1) was determined by <sup>1</sup>H NMR spectroscopic analysis of the crude product ( $\delta$  major: 2.51 ppm,  $\delta$  minor: 2.79 ppm). The mixture was purified by column chromatography using silica gel to give a mixture of diastereoisomer along with trace amount of impurity (39 mg, 95% overall yield in a diastereomeric ratio = 4:1); a white solid. m.p. for *syn-3c* = 114-117 °C;  $[\alpha]_D^{20}$  (*syn-3c*) = -79.7 (c 1.0, CHCl<sub>3</sub>);  $[\alpha]_D^{20}$  (*anti-3c*) = -139.5 (c 0.5,

CHCl<sub>3</sub>). IR (CH<sub>2</sub>Cl<sub>2</sub>):  $\nu$ (*syn*-**3c**) 2922, 1813, 1676, 1645, 1604, 1522, 1453, 1367, 1342, 1320, 1289, 1163, 1106, 1044, 1025, 973, 910, 877, 855, 833, 783 cm<sup>-1</sup>; R (CH<sub>2</sub>Cl<sub>2</sub>):  $\nu$ (*anti*-**3c**) 2961, 2925, 1782, 1680, 1646, 1605, 1522, 1493, 1450, 1347, 1258, 1174, 1070, 1015, 964, 859. <sup>1</sup>H NMR (300 MHz, CDCl<sub>3</sub>, TMS) for *syn*-**3c**:  $\delta$  7.95 (2H, d,  $J$  = 9.0 Hz, Ar-H), 7.87 (2H, d,  $J$  = 7.2 Hz, Ar-H), 7.57 (1H, t,  $J$  = 7.2 Hz, Ph-H), 7.48-7.39 (5H, m, Ph-H and =CH<sub>2</sub>), 6.60 (1H, s, =CH<sub>2</sub>), 5.03 (1H, s, Ar-CH), 2.51 (1H, qu,  $J$  = 7.2 Hz, -CH(CH<sub>3</sub>)<sub>2</sub>), 2.35 (3H, s, COCH<sub>3</sub>), 1.11 (3H, d,  $J$  = 7.2 Hz, -CH(CH<sub>3</sub>)<sub>2</sub>), 0.81 (3H, d,  $J$  = 7.2 Hz, -CH(CH<sub>3</sub>)<sub>2</sub>); <sup>1</sup>H NMR (400 MHz, CDCl<sub>3</sub>, TMS) for *anti*-**3c**:  $\delta$  8.10-8.05 (2H, m), 7.56-7.41 (4H, m), 7.36-7.31 (3H, m), 6.79 (1H, s), 6.41 (1H, s), 5.55 (1H, s), 2.79 (1H, qu,  $J$  = 6.8 Hz), 2.21 (3H, s), 1.22 (3H, d,  $J$  = 6.8 Hz), 1.10 (3H, d,  $J$  = 6.8 Hz); <sup>13</sup>C NMR (75 MHz, CDCl<sub>3</sub>) for *syn*-**3c**:  $\delta$  198.0, 177.6, 160.5, 147.0, 145.1, 144.2, 133.0, 131.1, 129.8, 128.8, 127.7, 124.9, 123.0, 79.4, 46.5, 32.4, 25.5, 17.4, 15.2; <sup>13</sup>C NMR (100 MHz, CDCl<sub>3</sub>) for *anti*-**3c**:  $\delta$  197.2, 169.4, 163.3, 147.2, 144.5, 142.8, 137.1, 131.5, 130.8, 129.2, 128.5, 126.6, 123.1, 106.7, 51.2, 28.1, 25.1, 18.9; MS (EI(*syn*-**3c**))  $m/z$  (%) 406 (0.12) [M<sup>+</sup>], 202 (19.95), 174 (5.82), 115 (1.70), 105 (100.00), 77 (15.77), 51 (2.09), 43 (11.30); HRMS (EI) Calcd for C<sub>23</sub>H<sub>22</sub>N<sub>2</sub>O<sub>5</sub> [M<sup>+</sup>] requires 406.1529, Found 406.1531; MS (ESI(*anti*-**3c**))  $m/e$  407 (M<sup>+</sup>+H); HRMS (ESI) for C<sub>23</sub>H<sub>23</sub>N<sub>2</sub>O<sub>5</sub> (M+H): 407.1610, Found: 407.1602; The ee of the *syn*-diastereomer was determined to be 98% [determined by HPLC, Chiralpak AD-H, n-hexane/isopropanol = 90:10, 0.7 mL/min,  $\lambda$  = 230 nm,  $t$  (major) = 9.77 min,  $t$  (minor) = 12.36 min]; The ee of the *anti*-diastereomer was determined to be 94% [determined by HPLC, Chiralpak AD-H, n-hexane/isopropanol = 90:10, 0.5 mL/min,  $\lambda$  = 230 nm,  $t$  (major) = 21.78 min,  $t$  (minor) = 20.54 min].

**<sup>1</sup>H NMR (300 MHz, CDCl<sub>3</sub>, TMS) for the crude product:**

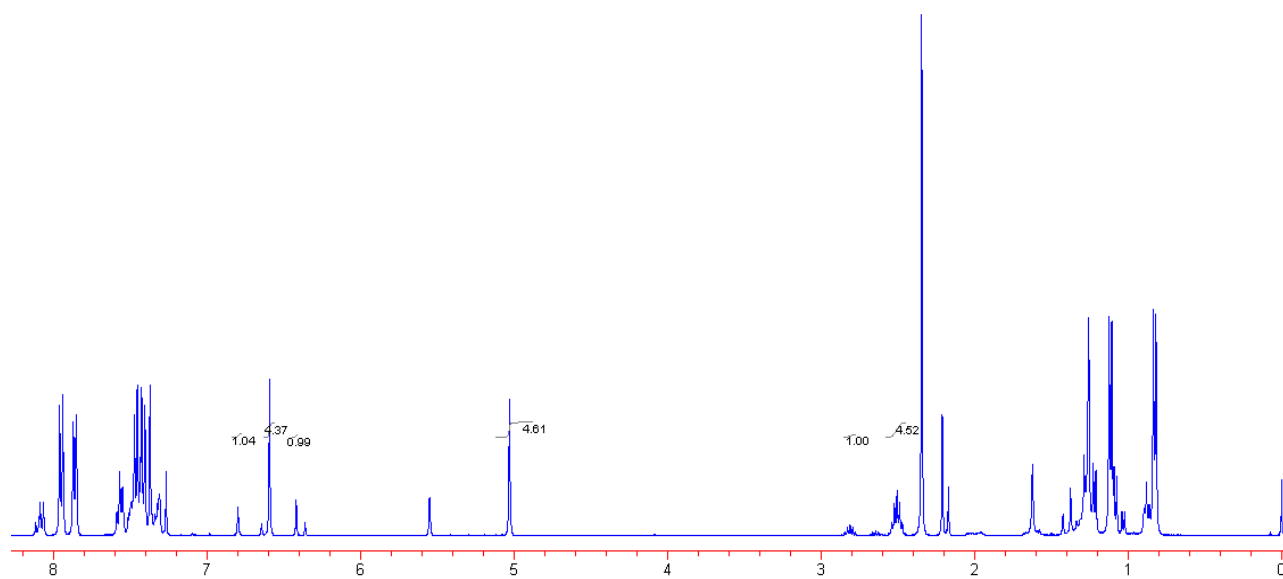

**<sup>1</sup>H NMR (300 MHz, CDCl<sub>3</sub>, TMS) for the *syn*-diastereomer**

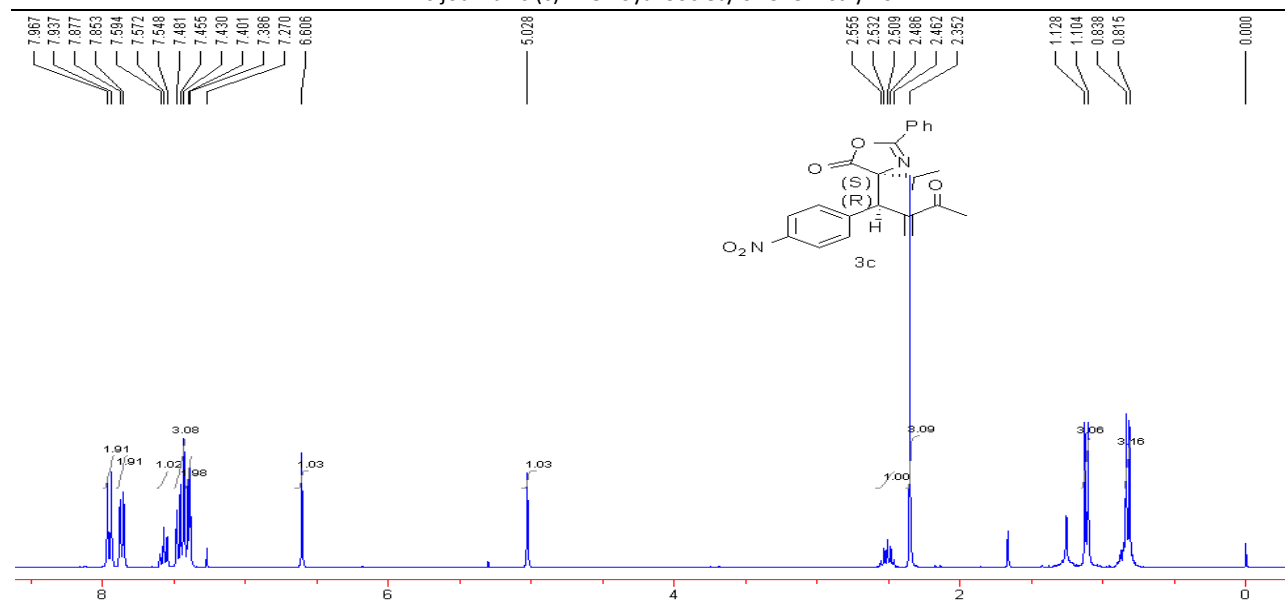

**<sup>13</sup>C NMR (75 MHz, CDCl<sub>3</sub>, TMS) for the *syn*-diastereomer**

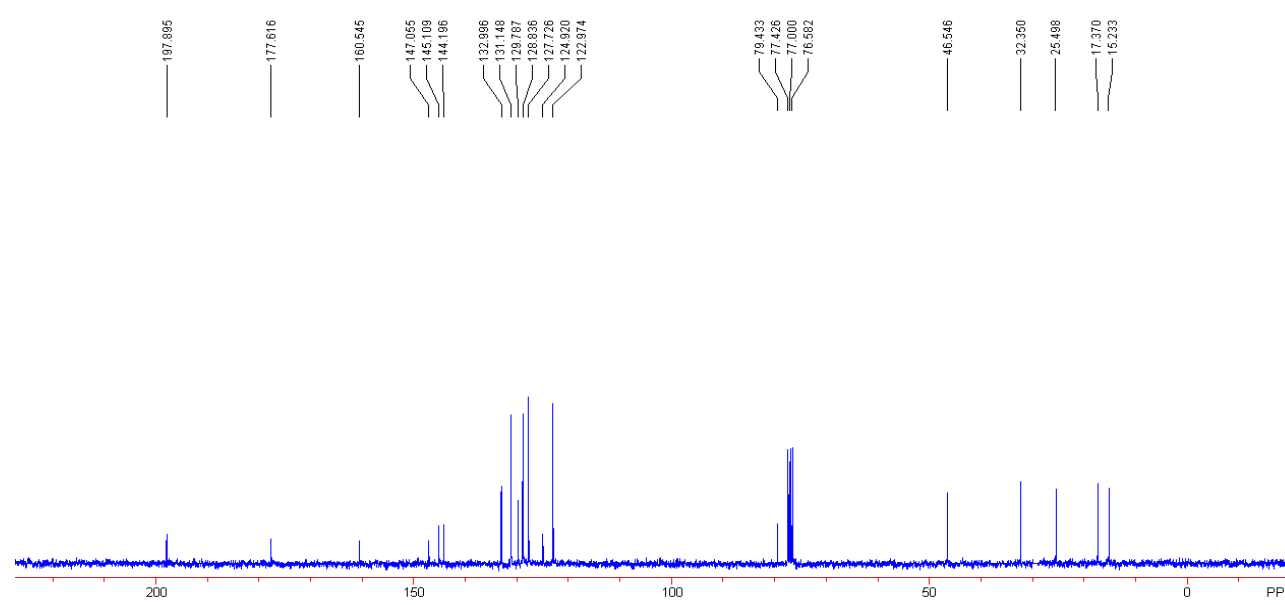

**<sup>1</sup>H NMR (400 MHz, CDCl<sub>3</sub>, TMS) for the *anti*-diastereomer**

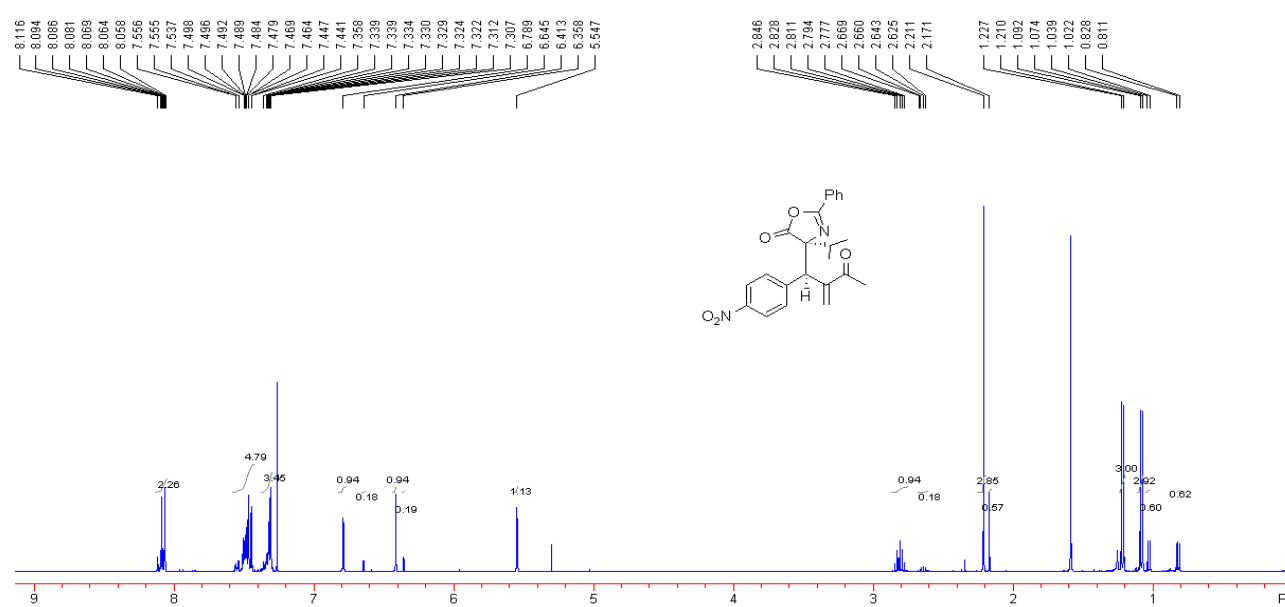

**<sup>13</sup>C NMR (100 MHz, CDCl<sub>3</sub>, TMS) for the *anti*-diastereomer**

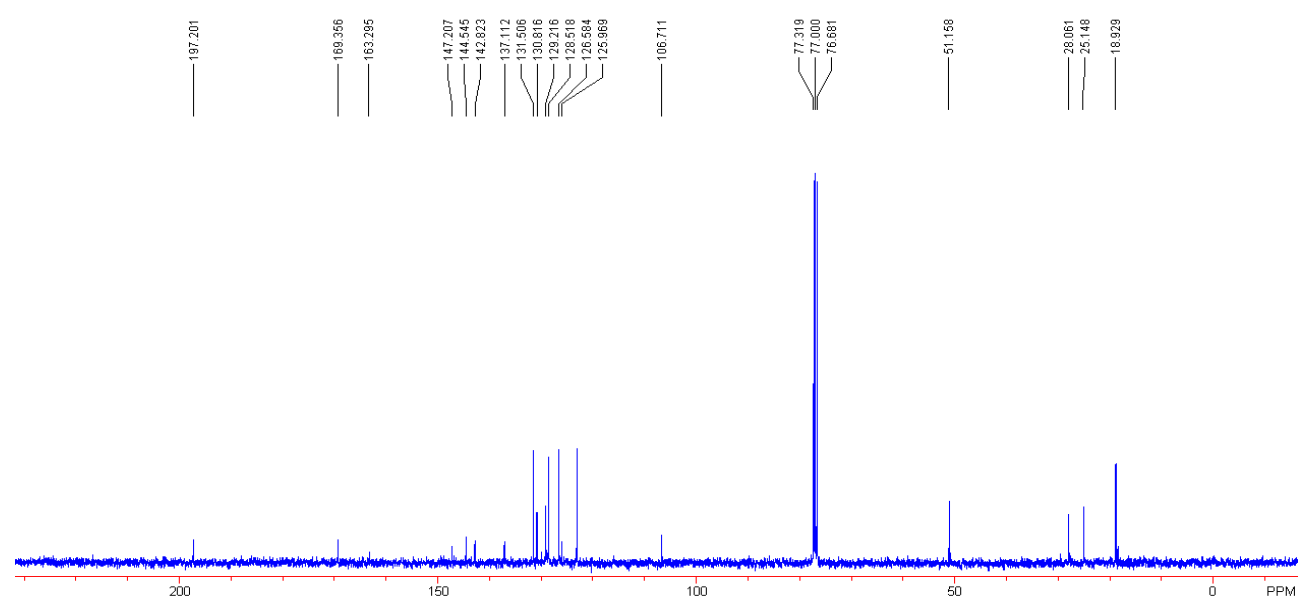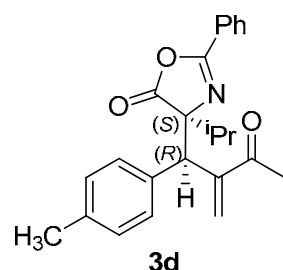

**(S)-4-isorpropyl-4-((R)-2-methylene-3-oxo-1-p-tolylbutyl)-2-phenyloxazol-5(4H)-one 3d:**

Following the general procedure, the *syn/anti* ratio (20:1) was determined by <sup>1</sup>H NMR spectroscopic analysis of the crude product ( $\delta$  major: 2.46 ppm,  $\delta$  minor: 2.75 ppm). The mixture was purified by column chromatography using silica gel to give a mixture of diastereoisomers along with trace amount of impurity (34 mg, 91% overall yield in a diastereomeric ratio = 20:1); a white solid. m.p. for *syn*-**3d** = 90-93 °C;  $[\alpha]_D^{20}$  (*syn*-**3d**) = -53.3 (c 0.7, CHCl<sub>3</sub>). IR (CH<sub>2</sub>Cl<sub>2</sub>):  $\nu$  2921, 1812, 1679, 1652, 1322, 1294, 1046, 1022, 963, 909, 882, 810, 785 cm<sup>-1</sup>; <sup>1</sup>H NMR (400 MHz, CDCl<sub>3</sub>, TMS) for *syn*-**3d**:  $\delta$  7.88-7.85 (2H, m, Ph-H), 7.55-7.51 (1H, m, Ph-H), 7.46-7.41 (2H, m, Ph-H), 7.24 (1H, s, =CH<sub>2</sub>), 7.10 (2H, d,  $J$  = 8.0 Hz, Ar-H), 6.88 (2H, d,  $J$  = 7.6 Hz, Ar-H), 6.46 (1H, s, =CH<sub>2</sub>), 4.90 (1H, s, Ar-CH), 2.46 (1H, qu,  $J$  = 6.8 Hz, -CH(CH<sub>3</sub>)<sub>2</sub>), 2.30 (3H, s, COCH<sub>3</sub>), 2.15 (3H, s, PhCH<sub>3</sub>), 1.11 (3H, d,  $J$  = 6.8 Hz, -CH(CH<sub>3</sub>)<sub>2</sub>), 0.81 (3H, d,  $J$  = 6.8 Hz, -CH(CH<sub>3</sub>)<sub>2</sub>); <sup>13</sup>C NMR (100 MHz, CDCl<sub>3</sub>) for *syn*-**3d**:  $\delta$  198.2, 178.1, 160.0, 146.4, 136.9, 133.3, 132.4, 130.0, 128.6, 128.5, 128.3, 127.7, 125.7, 80.1, 46.5, 32.3, 25.7, 20.9, 17.6, 15.4; MS (EI(*syn*-**3d**))  $m/z$  (%) 375 (1.26) [M<sup>+</sup>], 173 (41.78), 131 (8.05), 115 (4.62), 105 (33.00), 86 (14.60), 84 (22.95), 77 (22.56), 43 (100); HRMS (EI) Calcd for C<sub>24</sub>H<sub>25</sub>NO<sub>3</sub> [M<sup>+</sup>] requires 375.1834, Found 375.1834; The ee of the *syn*-diastereomer was determined to be 96% [determined by HPLC, Chiralpak AD-H, n-hexane/isopropanol = 90:10, 0.7 mL/min,  $\lambda$  = 230 nm, t (major) = 6.78 min, t (minor) = 7.78 min].

**<sup>1</sup>H NMR (400 MHz, CDCl<sub>3</sub>, TMS) for the crude product**

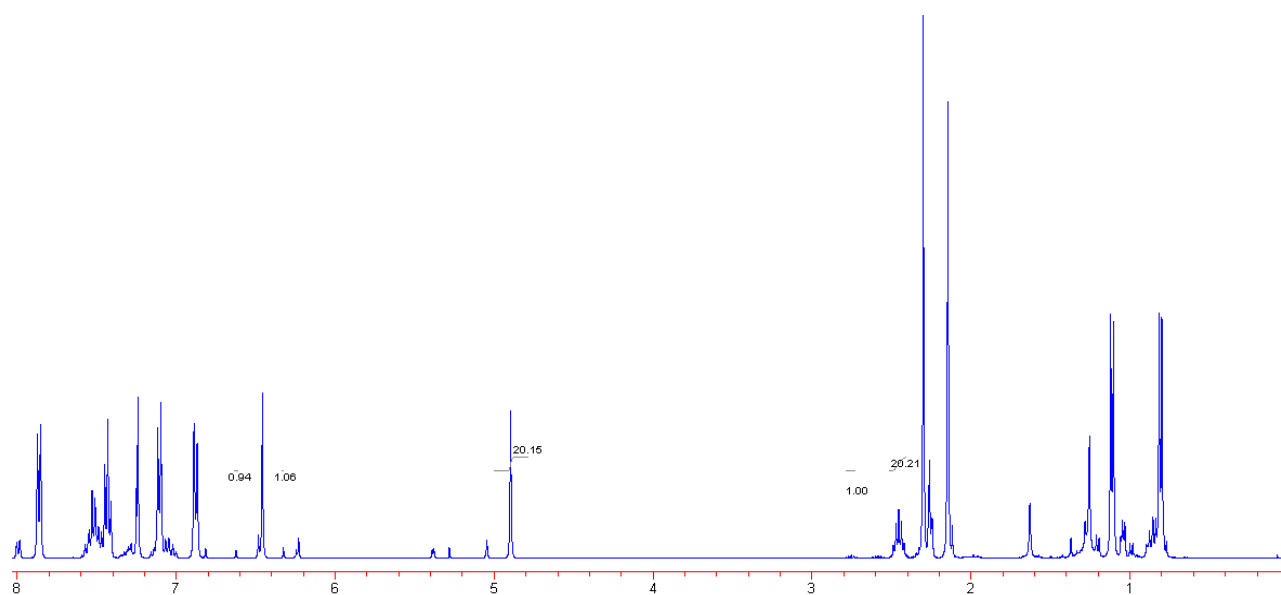

**<sup>1</sup>H NMR (400 MHz, CDCl<sub>3</sub>, TMS) for the *syn*-diastereomer**

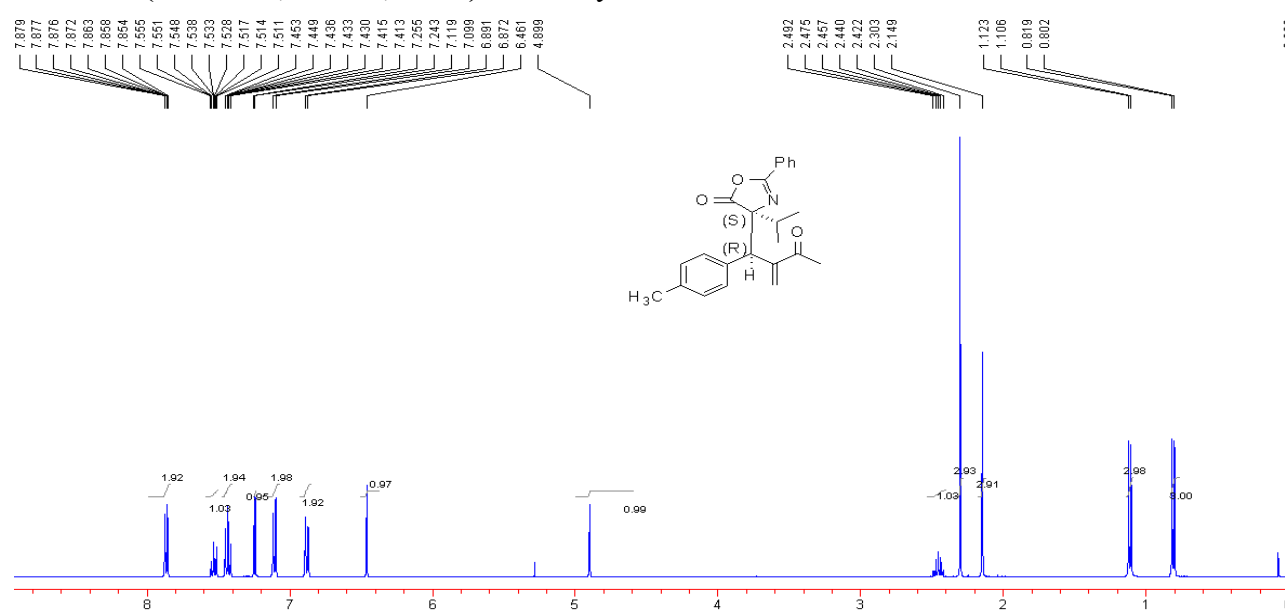

**<sup>13</sup>C NMR (100 MHz, CDCl<sub>3</sub>, TMS) for the *syn*-diastereomer**

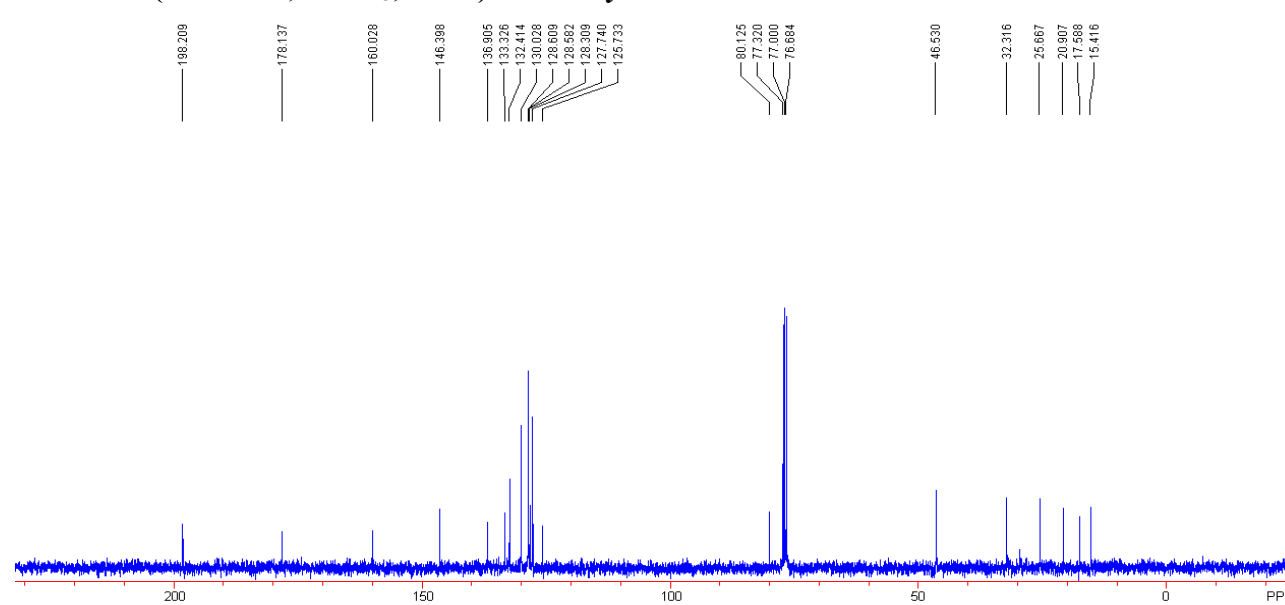

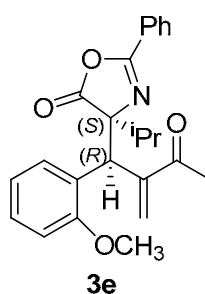

**(S)-4-isorpropyl-4-((R)-1-(2-methoxyphenyl)-2-methylene-3-oxobutyl)-2-phenyloxazol-5(4H)-one 3e:** Following the general procedure, the *syn/anti* ratio (5:1) was determined by  $^1\text{H}$  NMR spectroscopic analysis of the crude product ( $\delta$  major: 2.45 ppm,  $\delta$  minor: 2.79 ppm). The mixture was purified by column chromatography using silica gel to give a mixture of diastereoisomers along with trace amount of impurity (37 mg, 94% overall yield in a diastereomeric ratio = 5:1). m.p. for *syn-3e* = 119-121 °C;  $[\alpha]_D^{20}$  (*syn-3e*) = +55.5 (c 0.7,  $\text{CHCl}_3$ );  $[\alpha]_D^{20}$  (*anti-3e*) = -7.7 (c 0.5,  $\text{CHCl}_3$ ). IR ( $\text{CH}_2\text{Cl}_2$ ):  $\nu$ (*syn-3e*) 2921, 1817, 1676, 1647, 1489, 1461, 1449, 1344, 1290, 1240, 1198, 1154, 1109, 1043, 1023, 955, 910, 882, 787, 728  $\text{cm}^{-1}$ ; IR ( $\text{CH}_2\text{Cl}_2$ ):  $\nu$ (*anti-3e*) 2961, 2926, 2854, 1826, 1780, 1685, 1655, 1599, 1492, 1258, 1216, 1169, 1105, 1072, 1022, 951, 881, 800.  $^1\text{H}$  NMR (400 MHz,  $\text{CDCl}_3$ , TMS) for *syn-3e*:  $\delta$  7.88 (2H, d,  $J$  = 8.4 Hz, Ph-H), 7.53 (1H, t,  $J$  = 7.2 Hz, Ph-H), 7.44 (2H, t,  $J$  = 7.2 Hz, Ph-H), 7.31 (1H, dd,  $J_1$  = 7.8 Hz,  $J_2$  = 1.2 Hz, Ar-H), 7.09-7.04 (1H, m, Ar-H), 6.97 (1H, s, =CH<sub>2</sub>), 6.83-6.81 (1H, m, Ar-H), 6.63-6.60 (1H, m, Ar-H), 6.37 (1H, s, =CH<sub>2</sub>), 5.71 (1H, s, Ar-CH), 3.87 (3H, s, Ar-OCH<sub>3</sub>), 2.45 (1H, qu,  $J$  = 6.8 Hz, -CH(CH<sub>3</sub>)<sub>2</sub>), 2.27 (3H, s, COCH<sub>3</sub>), 1.12 (3H, d,  $J$  = 6.8 Hz, -CH(CH<sub>3</sub>)<sub>2</sub>), 0.84 (3H, d,  $J$  = 6.8 Hz, -CH(CH<sub>3</sub>)<sub>2</sub>);  $^1\text{H}$  NMR (400 MHz,  $\text{CDCl}_3$ , TMS) for *anti-3e*:  $\delta$  7.57-7.55 (2H, m), 7.34-7.24 (5H, m), 6.88-6.73 (2H, m), 6.60 (1H, s), 6.29 (1H, s), 6.01 (1H, s), 3.84 (3H, s), 2.79 (1H, qu,  $J$  = 6.8 Hz), 2.21 (3H, s), 1.22 (3H, d,  $J$  = 6.8 Hz), 1.13 (3H, d,  $J$  = 6.8 Hz);  $^{13}\text{C}$  NMR (100 MHz,  $\text{CDCl}_3$ ) for *syn-3e*:  $\delta$  198.5, 177.7, 159.9, 157.1, 147.4, 132.4, 130.9, 128.6, 128.4, 128.3, 127.7, 125.8, 125.3, 119.4, 111.4, 80.0, 56.0, 38.1, 32.5, 26.0, 17.4, 15.8;  $^{13}\text{C}$  NMR (100 MHz,  $\text{CDCl}_3$ ) for *anti-3e*:  $\delta$  197.7, 168.5, 158.1, 146.1, 137.8, 130.5, 129.9, 128.7, 128.3, 128.1, 127.3, 126.7, 126.1, 119.6, 111.3, 69.9, 56.1, 43.3, 28.0, 27.7, 25.7, 19.0, 18.8; MS (EI(*syn-3e*))  $m/z$  (%) 391 (0.51) [ $\text{M}^+$ ], 190 (6.62), 189 (47.94), 147 (20.16), 131 (6.13), 115 (4.41), 105 (31.61), 86 (61.28), 84 (100.00), 77 (23.16), 43 (89.95); HRMS (EI) Calcd for  $\text{C}_{24}\text{H}_{25}\text{NO}_4$  [ $\text{M}^+$ ] requires 391.1784, Found 391.1785; MS (ESI(*anti-3e*))  $m/e$  392 ( $\text{M}^+\text{H}$ ); HRMS (ESI) for  $\text{C}_{24}\text{H}_{26}\text{NO}_4$  ( $\text{M}^+\text{H}$ ): 392.1861, Found: 392.1856. The ee of the *syn*-diastereomer was determined to be 95% [determined by HPLC, Chiralpak AD-H, n-hexane/isopropanol = 90:10, 0.7 mL/min,  $\lambda$  = 230 nm,  $t$  (major) = 7.02 min,  $t$  (minor) = 8.57 min]; The ee of the *anti*-diastereomer was determined to be 94% [determined by HPLC, Chiralpak IC-H, n-hexane/isopropanol = 95:5, 0.3 mL/min,  $\lambda$  = 230 nm,  $t$  (major) = 31.09 min,  $t$  (minor) = 31.33 min].

**$^1\text{H}$  NMR (400 MHz,  $\text{CDCl}_3$ , TMS) for the crude product**

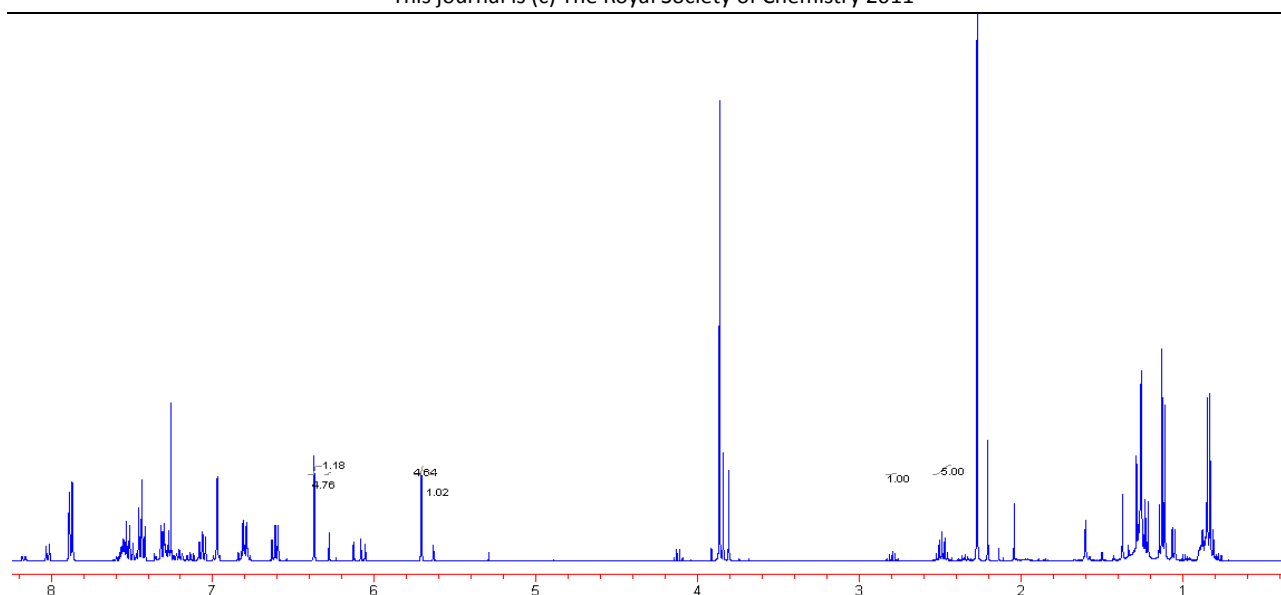

**<sup>1</sup>H NMR (400 MHz, CDCl<sub>3</sub>, TMS) for the *syn*-diastereomer**

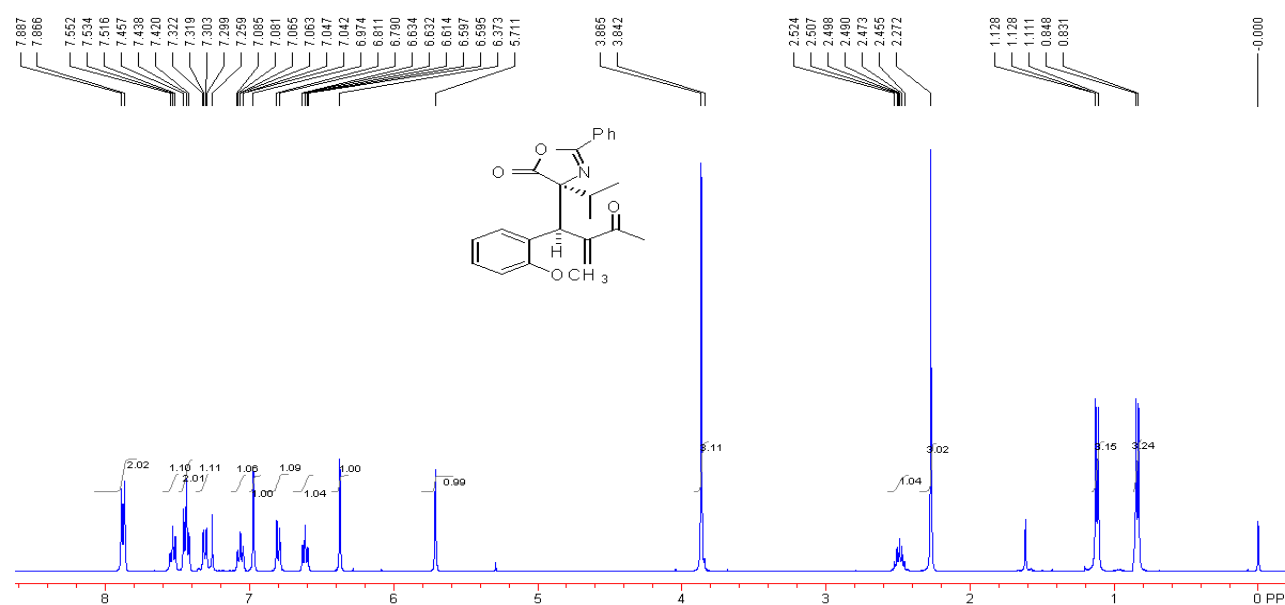

**<sup>13</sup>C NMR (100 MHz, CDCl<sub>3</sub>, TMS) for the *syn*-diastereomer**

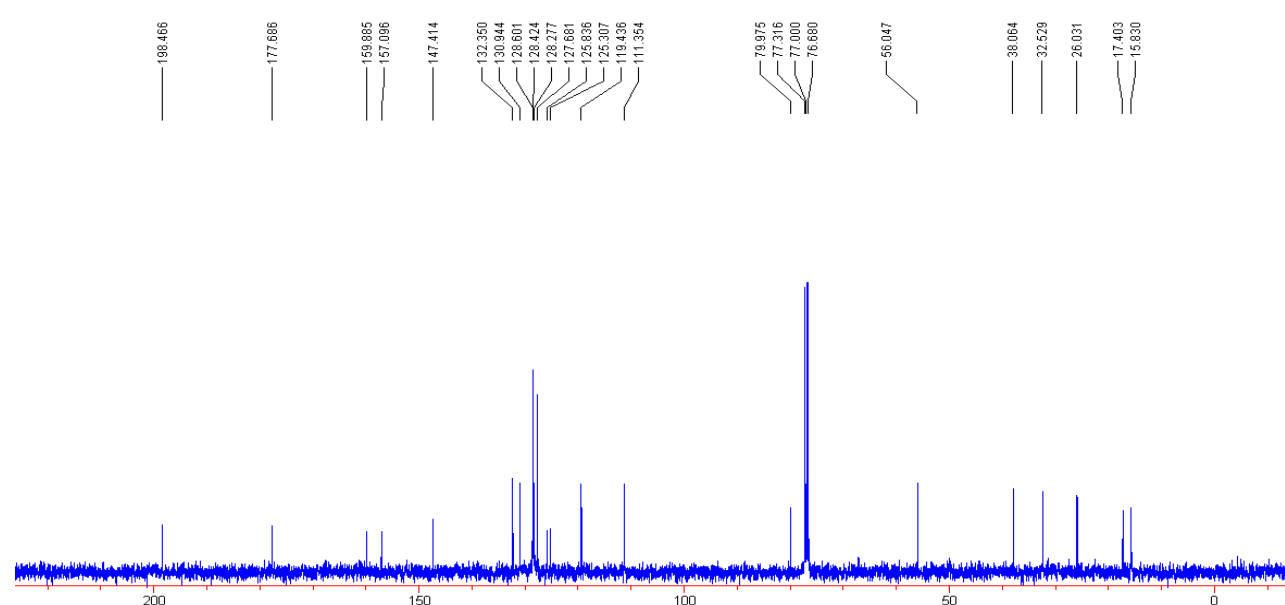

**<sup>1</sup>H NMR (400 MHz, CDCl<sub>3</sub>, TMS) for the *anti*-diastereomer (containing some impurities)**

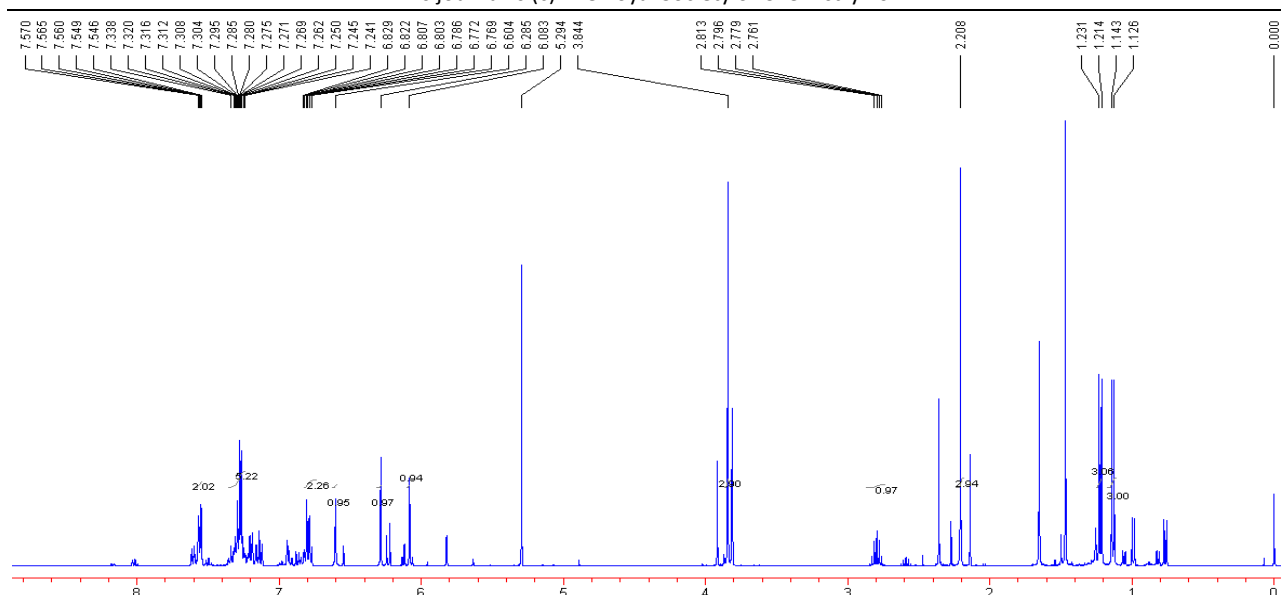

<sup>13</sup>C NMR (100 MHz, CDCl<sub>3</sub>, TMS) for the *anti*-diastereomer (containing some impurities)

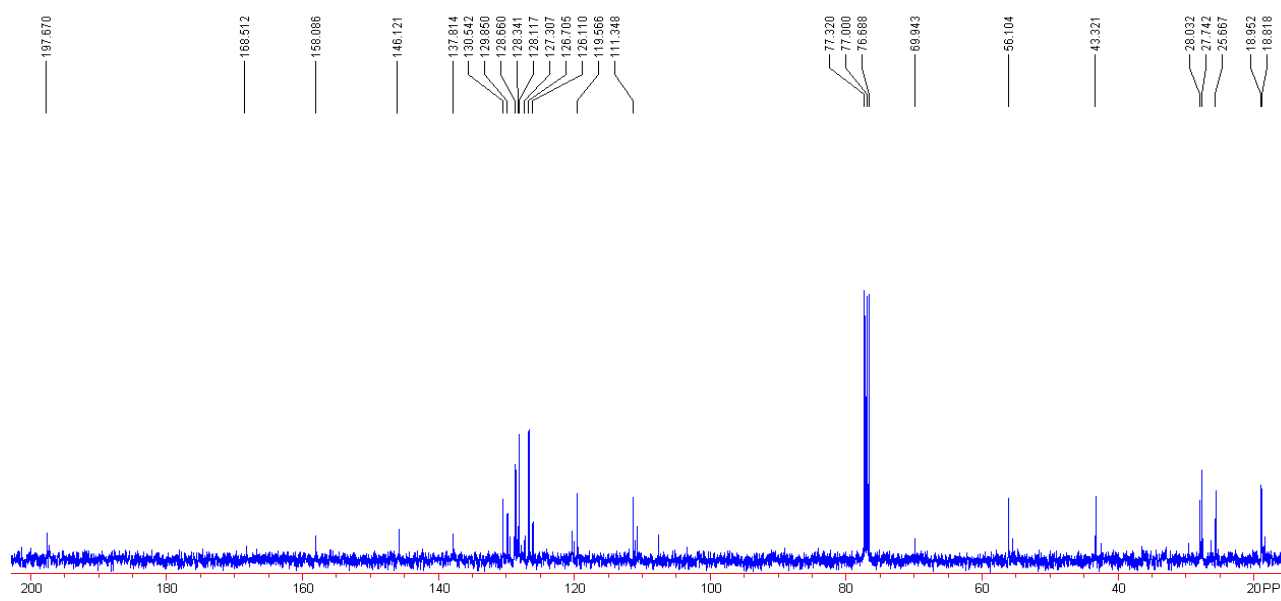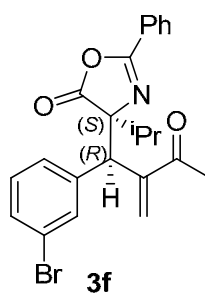

**(S)-4-((R)-1-(3-bromophenyl)-2-methylene-3-oxobutyl)-4-isopropyl-2-phenyloxazol-5(4H)-one**

**3f**: Following the general procedure, the *syn/anti* ratio (15:1) was determined by <sup>1</sup>H NMR spectroscopic analysis of the crude product ( $\delta$  major: 2.47 ppm,  $\delta$  minor: 2.80 ppm). The mixture was purified by column chromatography using silica gel to give a mixture of diastereoisomer along with trace amount of impurity (40 mg, 91% overall yield in a diastereomeric ratio = 15:1); a white solid. m.p. for *syn-3f* = 154-156 °C;  $[\alpha]_D^{20}$  (*syn-3f*) = -71.8 (c 0.8, CHCl<sub>3</sub>). IR (CH<sub>2</sub>Cl<sub>2</sub>):  $\nu$  2974, 2954, 1811, 1673, 1655, 1470, 1288, 1196, 1159, 1111, 1041, 1019, 978, 916, 888, 876, 800, 731



$\text{cm}^{-1}$ ;  $^1\text{H}$  NMR (400 MHz,  $\text{CDCl}_3$ , TMS) for *syn*-**3f**:  $\delta$  7.87 (2H, d,  $J = 6.8$  Hz, Ph-H), 7.55 (1H, t,  $J = 7.6$  Hz, Ph-H), 7.45 (2H, t,  $J = 7.2$  Hz, Ph-H), 7.35 (1H, s, Ar-H), 7.28 (1H, s,  $=\text{CH}_2$ ), 7.19 (2H, dd,  $J_1 = 8.0$  Hz,  $J_2 = 2.0$  Hz, Ar-H), 6.97 (1H, t,  $J = 8.0$  Hz, Ar-H), 6.52 (1H, s,  $=\text{CH}_2$ ), 4.89 (1H, s, Ar-CH), 2.47 (1H, qu,  $J = 6.8$  Hz,  $-\text{CH}(\text{CH}_3)_2$ ), 2.34 (3H, s,  $\text{COCH}_3$ ), 1.10 (3H, d,  $J = 6.8$  Hz,  $-\text{CH}(\text{CH}_3)_2$ ), 0.82 (3H, d,  $J = 6.8$  Hz,  $-\text{CH}(\text{CH}_3)_2$ );  $^{13}\text{C}$  NMR ( $\text{CDCl}_3$ , 100 MHz) for *syn*-**3f**:  $\delta$  198.0, 177.8, 160.4, 145.6, 138.8, 133.0, 132.7, 130.5, 129.5, 129.1, 129.0, 128.7, 127.8, 125.3, 121.6, 79.7, 46.6, 32.2, 25.6, 17.5, 15.3; MS (EI(*syn*-**3f**))  $m/z$  (%) 439 (2.18) [ $\text{M}^+$ ], 237 (5.17), 202 (20.39), 174 (5.64), 158 (8.15), 115 (6.41), 105 (100.00), 84 (11.45), 77 (25.88), 43 (39.26); HRMS (EI) Calcd for  $\text{C}_{23}\text{H}_{22}\text{BrNO}_3$  [ $\text{M}^+$ ] requires 439.0783, Found 439.0790; The ee of the *syn*-diastereomer was determined to be 97% [determined by HPLC, Chiralpak IC-H, n-hexane/isopropanol = 99:1, 0.7 mL/min,  $\lambda = 230$  nm,  $t$  (major) = 15.63 min,  $t$  (minor) = 8.57 min].

**$^1\text{H}$  NMR (400 MHz,  $\text{CDCl}_3$ , TMS) for the crude product**

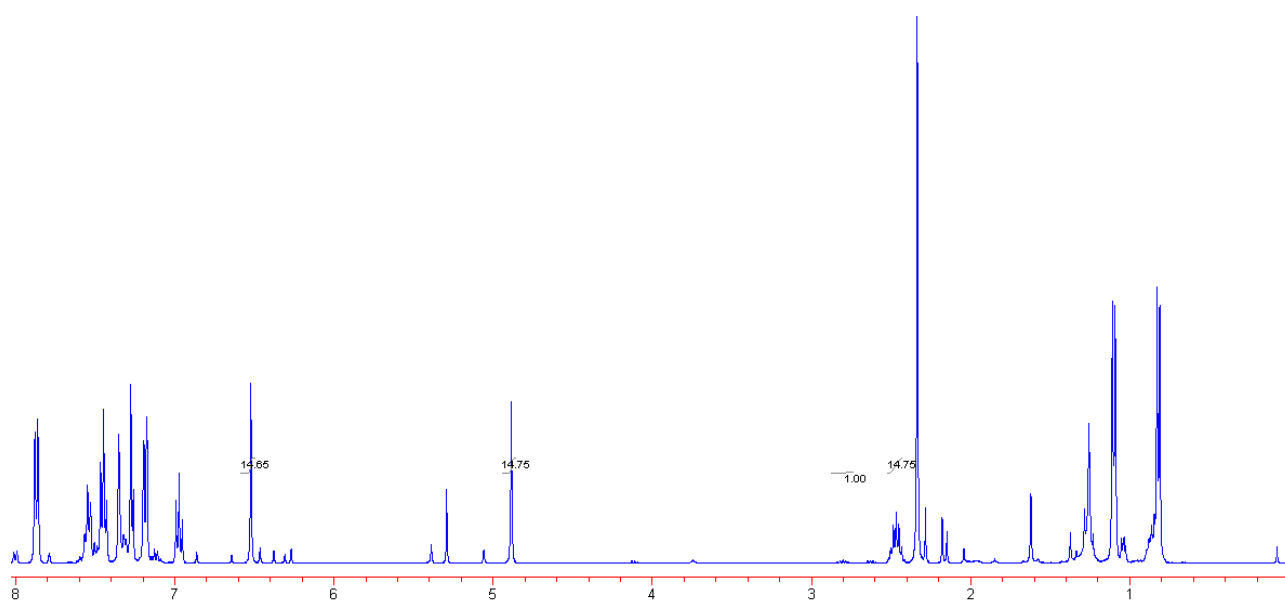

**$^1\text{H}$  NMR (400 MHz,  $\text{CDCl}_3$ , TMS) for the *syn*-diastereomer**

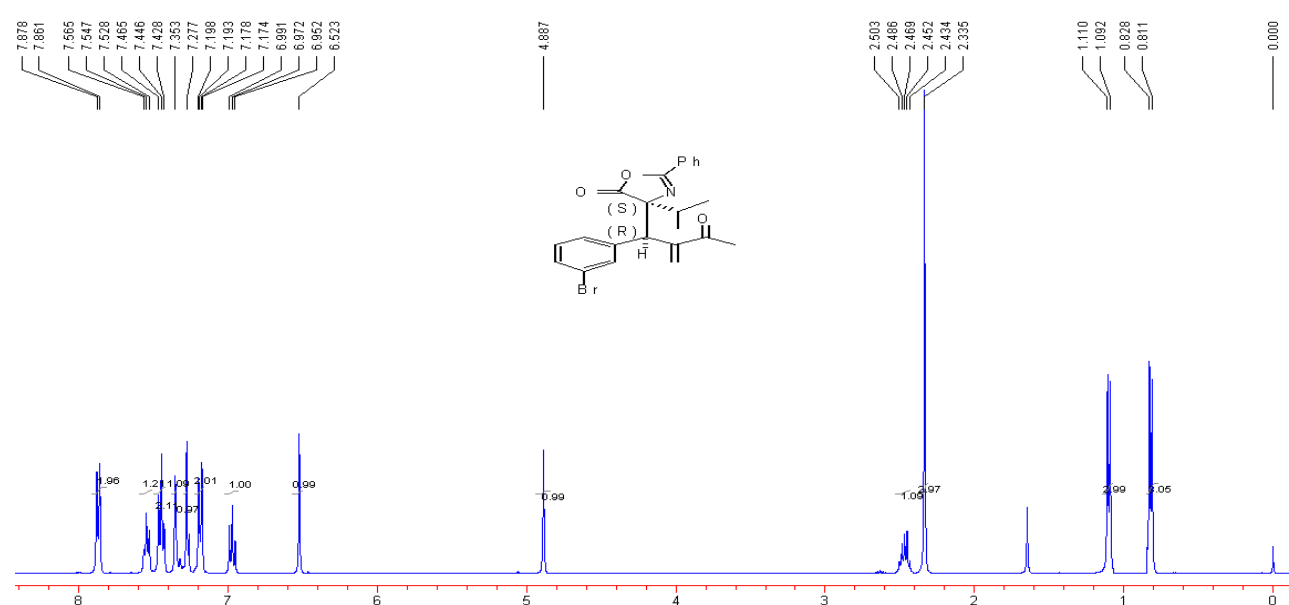

**<sup>13</sup>C NMR (100 MHz, CDCl<sub>3</sub>, TMS) for the *syn*-diastereomer**

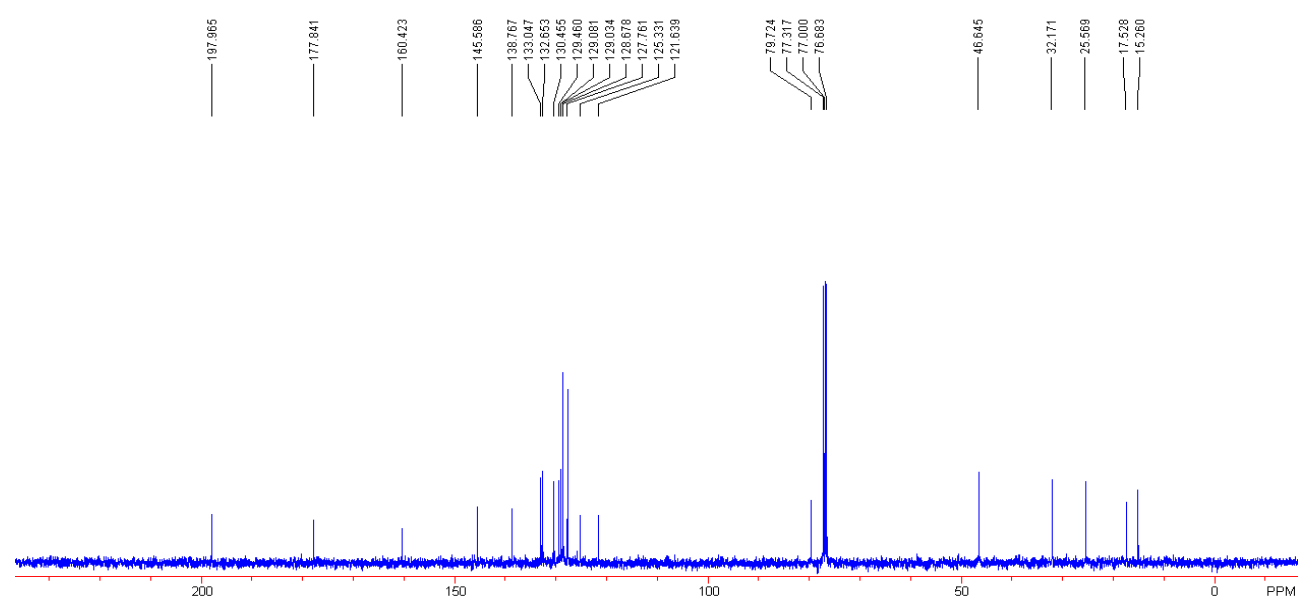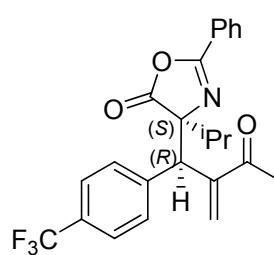

**3g**

**(S)-4-isorpropyl-4-((R)-2-methylene-3-oxo-1-(4-(trifluorophenyl))butyl)-2-phenyloxazol-5(4H)-one 3g:** Following the general procedure, the *syn/anti* ratio (16:1) was determined by <sup>1</sup>H NMR spectroscopic analysis of the crude product ( $\delta$  major: 2.50 ppm,  $\delta$  minor: 2.78 ppm). The mixture was purified by column chromatography using silica gel to give a mixture of diastereoisomer along with trace amount of impurity (37 mg, 86% overall yield in a diastereomeric ratio = 16:1); a white solid. m.p. for *syn*-**3g** = 122-123 °C;  $[\alpha]_D^{20}$  (*syn*-**3g**) = -57.3 (c 0.8, CHCl<sub>3</sub>). IR (CH<sub>2</sub>Cl<sub>2</sub>):  $\nu$  2978, 2881, 1813, 1673, 1650, 1617, 1493, 1451, 1323 1292, 1251, 1198, 1128, 1110, 1043, 1018, 986, 969, 911, 881, 821, 781 cm<sup>-1</sup>; <sup>1</sup>H NMR (400 MHz, CDCl<sub>3</sub>, TMS) for *syn*-**3g**:  $\delta$  7.86 (2H, d,  $J$  = 7.2 Hz, Ph-H), 7.55 (1H, t,  $J$  = 7.8 Hz, Ph-H), 7.44 (2H, t,  $J$  = 7.2 Hz, Ph-H), 7.33-7.38 (5H, m, Ar-H and =CH<sub>2</sub>), 6.54 (1H, s, =CH<sub>2</sub>), 5.00 (1H, s, Ar-CH), 2.50 (1H, qu,  $J$  = 6.8 Hz, -CH(CH<sub>3</sub>)<sub>2</sub>), 2.33 (3H, s, COCH<sub>3</sub>), 1.11 (3H, d,  $J$  = 6.8 Hz, -CH(CH<sub>3</sub>)<sub>2</sub>), 0.82 (3H, d,  $J$  = 6.8 Hz, -CH(CH<sub>3</sub>)<sub>2</sub>); <sup>13</sup>C NMR (100 MHz, CDCl<sub>3</sub>) for *syn*-**3g**:  $\delta$  198.0, 177.8, 160.4, 145.6, 140.7, 132.8, 130.6, 129.5 (q,  $J_{C-F}$  = 32.0 Hz), 129.2, 128.7, 127.7, 125.3, 124.8 (q,  $J_{C-F}$  = 3.7 Hz), 123.9 (q,  $J_{C-F}$  = 207.7 Hz), 79.7, 46.6, 32.3, 25.5, 17.4, 15.3; <sup>19</sup>F NMR (376 MHz, CDCl<sub>3</sub>, CFCl<sub>3</sub>):  $\delta$  (*syn*-**3g**) -62.7; MS (EI(*syn*-**3g**))  $m/z$  (%) 429 (1.67) [M<sup>+</sup>], 202 (24.30), 174 (5.44), 165 (0.60), 106 (8.18), 105 (100.00), 84 (9.37), 77 (23.72), 43 (26.76); HRMS (EI) Calcd for C<sub>24</sub>H<sub>22</sub>F<sub>3</sub>NO<sub>3</sub> [M<sup>+</sup>] requires 429.1552, Found 429.1557; The ee of the *syn*-diastereomer was determined to be 96% [determined by HPLC, Chiralpak AD-H, n-hexane/isopropanol = 95:5, 0.7 mL/min,  $\lambda$  = 230 nm, t (major) = 7.02 min, t

(minor) = 8.57 min].

**$^1\text{H}$  NMR (400 MHz,  $\text{CDCl}_3$ , TMS) for the crude product**

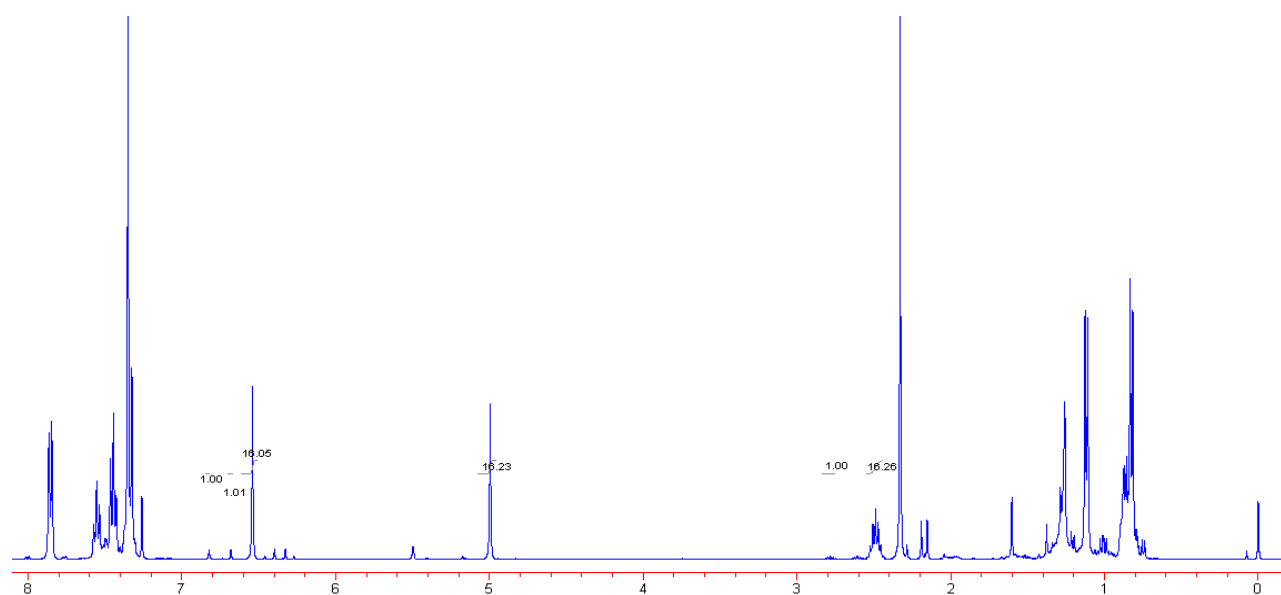

**$^1\text{H}$  NMR (400 MHz,  $\text{CDCl}_3$ , TMS) for the *syn*-diastereomer**

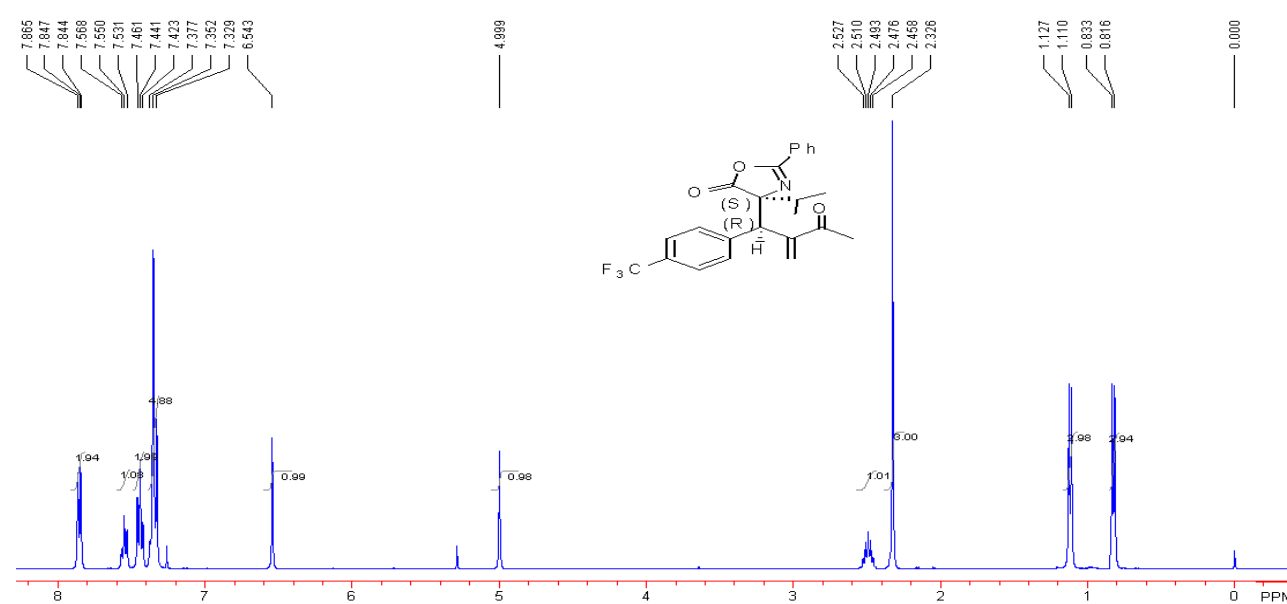

**$^{13}\text{C}$  NMR (100 MHz,  $\text{CDCl}_3$ , TMS) for the *syn*-diastereomer**

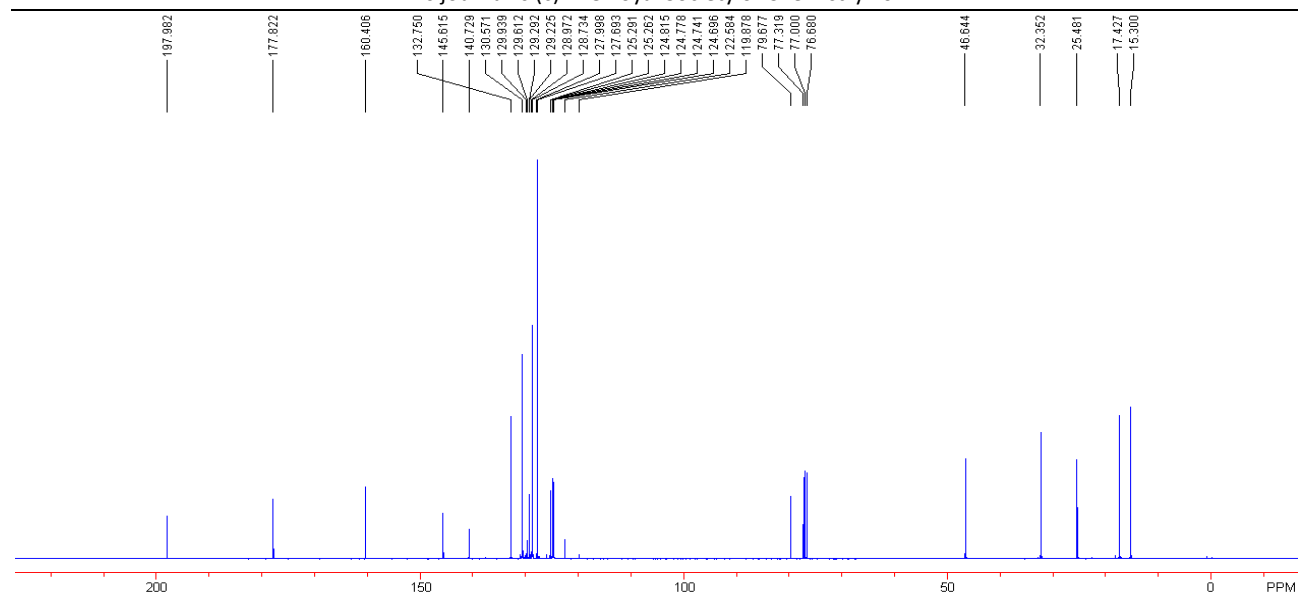

$^{19}\text{F}$  NMR (376 MHz,  $\text{CDCl}_3$ ,  $\text{CFCl}_3$ ) for the *syn*-diastereomer

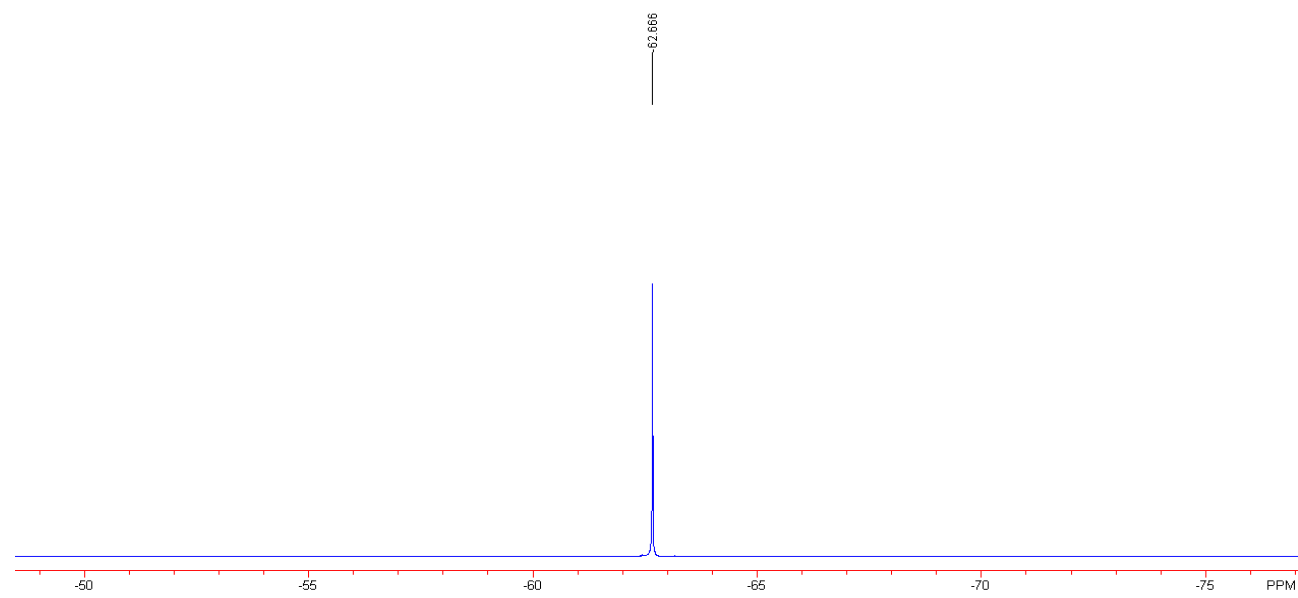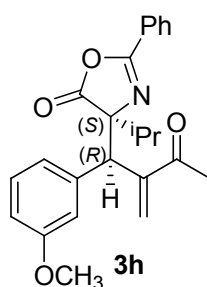

**(S)-4-isorpopyl-4-((R)-1-(3-methoxyphenyl)-2-methylene-3-oxobutyl)-2-phenyloxazol-5(4H)-one 3h:** Following the general procedure, the *syn/anti* ratio (12:1) was determined by  $^1\text{H}$  NMR spectroscopic analysis of the crude product ( $\delta$  major: 2.47 ppm,  $\delta$  minor: 2.77 ppm). The mixture was purified by column chromatography using silica gel to give a mixture of diastereoisomer along with trace amount of impurity (36 mg, 92% overall yield in a diastereomeric ratio = 12:1); a white solid. m.p. for *syn*-**3h** = 117-119 °C;  $[\alpha]_D^{20}$  (*syn*-**3h**) = -49.8 (c 0.7,  $\text{CHCl}_3$ ). IR ( $\text{CH}_2\text{Cl}_2$ ):  $\nu$  2974, 1818, 1680, 1651, 1597, 1491, 1467, 1451, 1294, 1259, 1244, 1199, 1154, 1111, 1045, 1021, 969,

902, 864, 794, 779, 729  $\text{cm}^{-1}$ ;  $^1\text{H}$  NMR (300 MHz,  $\text{CDCl}_3$ , TMS) for *syn-3h*:  $\delta$  7.87 (2H, d,  $J = 7.2$  Hz, Ph-H), 7.53 (1H, t,  $J = 7.5$  Hz, Ph-H), 7.43 (2H, t,  $J = 7.2$  Hz, Ph-H), 7.26 (1H, s, =CH<sub>2</sub>), 7.00 (1H, t,  $J = 7.8$  Hz, Ar-H), 6.82 (1H, d,  $J = 6.8$  Hz, Ar-H), 6.78-6.76 (1H, m), 6.61 (1H, dd,  $J_1 = 10.8$  Hz,  $J_2 = 3.2$  Hz, Ar-H), 6.49 (1H, s, =CH<sub>2</sub>), 4.92 (1H, s, Ar-CH), 3.57 (3H, s, Ar-OCH<sub>3</sub>), 2.47 (1H, qu,  $J = 7.2$  Hz, -CH(CH<sub>3</sub>)<sub>2</sub>), 2.32 (3H, s, COCH<sub>3</sub>), 1.12 (3H, d,  $J = 7.2$  Hz, -CH(CH<sub>3</sub>)<sub>2</sub>), 0.84 (3H, d,  $J = 7.2$  Hz, -CH(CH<sub>3</sub>)<sub>2</sub>);  $^{13}\text{C}$  NMR (75 MHz,  $\text{CDCl}_3$ ) for *syn-3h*:  $\delta$  198.2, 178.0, 160.1, 158.9, 146.1, 137.9, 132.5, 128.7, 128.6, 127.7, 125.6, 122.7, 115.3, 113.5, 80.0, 55.0, 46.9, 32.3, 25.7, 17.6, 15.4; MS (EI(*syn-3h*))  $m/z$  (%) 391 (4.95) [ $\text{M}^+$ ], 203 (4.09), 189 (77.39), 147 (45.34), 132 (6.29), 115 (8.73), 105 (100.00), 77 (52.88), 51 (5.77), 43 (84.84); HRMS (EI) Calcd for  $\text{C}_{24}\text{H}_{25}\text{NO}_4$  [ $\text{M}^+$ ] requires 391.1784, Found 391.1788; The ee of the *syn*-diastereomer was determined to be >99% [determined by HPLC, Chiralpak AD-H, n-hexane/isopropanol = 90:10, 0.7 mL/min,  $\lambda = 230$  nm, t (major) = 7.21 min, t (minor) = 17.78 min].

$^1\text{H}$  NMR (400 MHz,  $\text{CDCl}_3$ , TMS) for the crude product

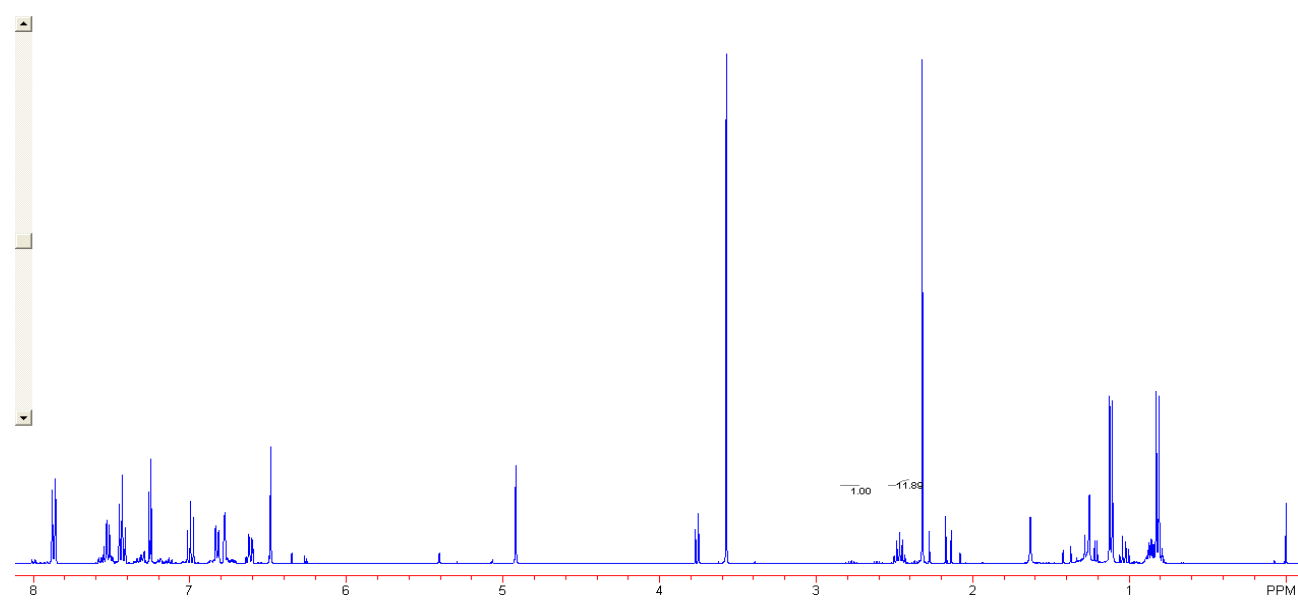

$^1\text{H}$  NMR (300 MHz,  $\text{CDCl}_3$ , TMS) for the *syn*-diastereomer

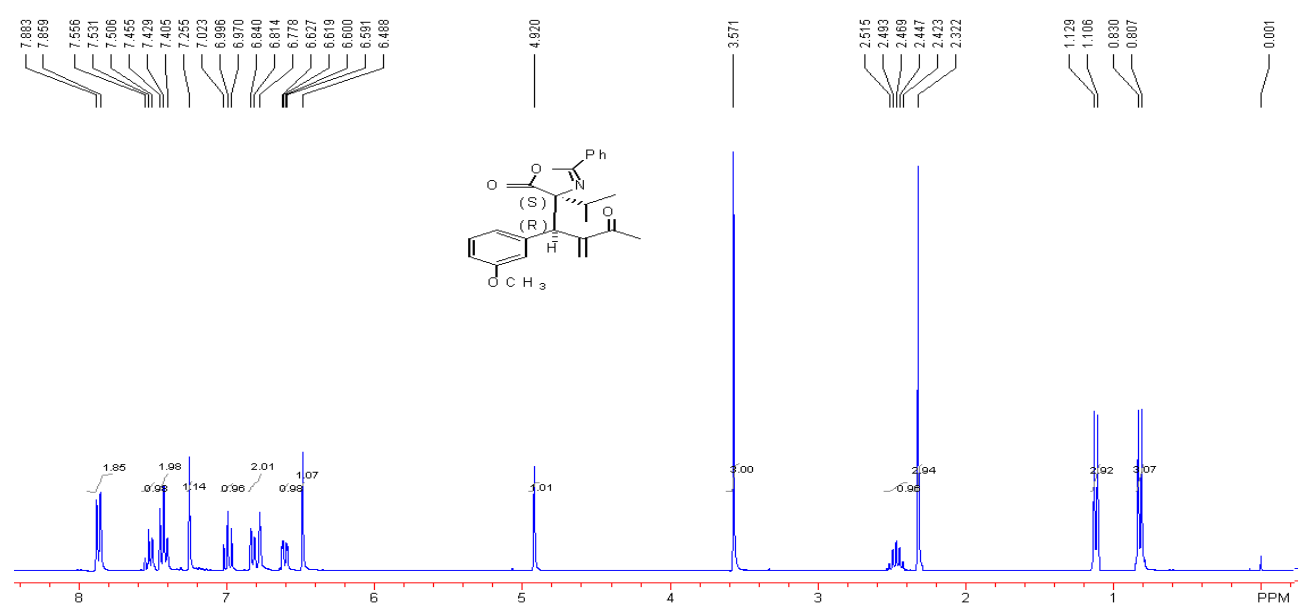

<sup>13</sup>C NMR (75 MHz, CDCl<sub>3</sub>, TMS) for the *syn*-diastereomer

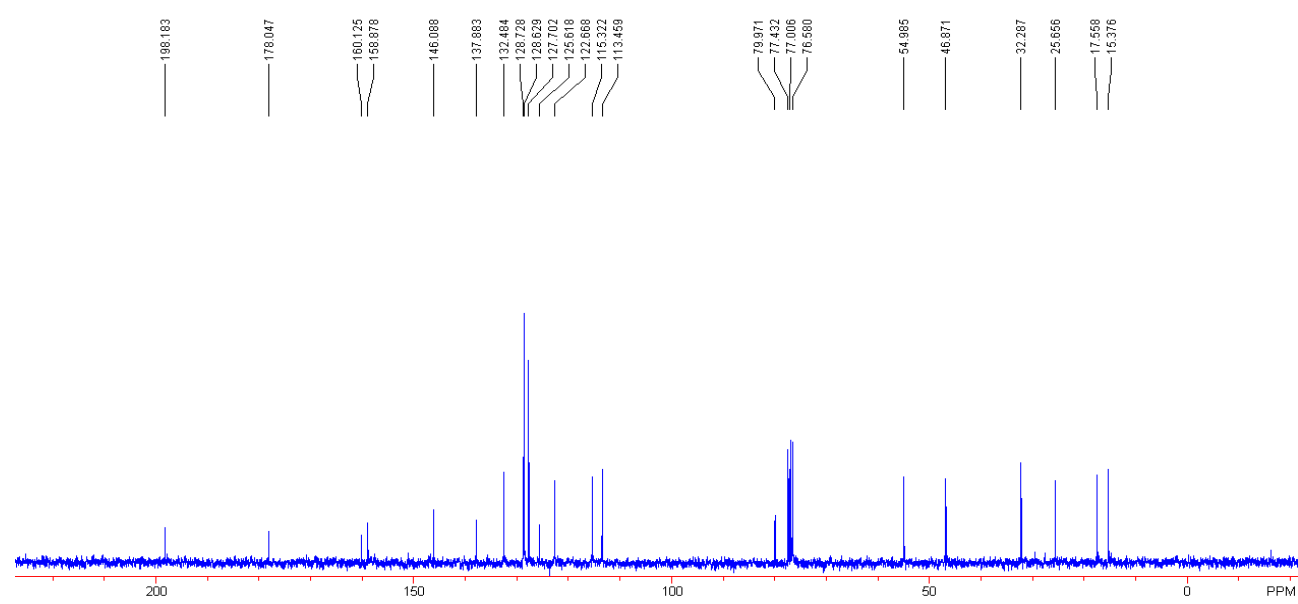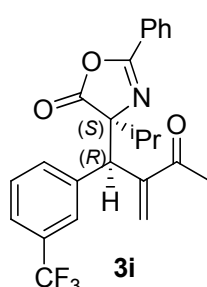

**(S)-4-isorpropyl-4-((R)-2-methylene-3-oxo-1-(3-(trifluorophenyl))butyl)-2-phenyloxazol-5(4H)-one 3i:** Following the general procedure, the *syn/anti* ratio (16:1) was determined by <sup>1</sup>H NMR spectroscopic analysis of the crude product ( $\delta$  major: 2.50 ppm,  $\delta$  minor: 2.75 ppm). The mixture was purified by column chromatography using silica gel to give a mixture of diastereoisomer along with trace amount of impurity (38 mg, 89% overall yield in a diastereomeric ratio = 16:1). a white solid. m.p. for *syn*-**3i** = 80-83 °C;  $[\alpha]_D^{20}$  (*syn*-**3i**) = -45.2 (c 0.9, CHCl<sub>3</sub>). IR (CH<sub>2</sub>Cl<sub>2</sub>):  $\nu$  2924, 1806, 1673, 1655, 1620, 1449, 1366 1288, 1161, 1177, 1131, 1096, 1042, 1021, 979, 968, 918, 891, 814, 729 cm<sup>-1</sup>; <sup>1</sup>H NMR (400 MHz, CDCl<sub>3</sub>, TMS) for *syn*-**3i**:  $\delta$  7.82 (2H, d,  $J$  = 9.6 Hz, Ar-H), 7.56-7.51 (1H, m, Ar-H), 7.45-7.40 (4H, m, Ar-H), 7.35 (1H, s, =CH<sub>2</sub>), 7.32 (1H, d,  $J$  = 10.8, Ar-H), 7.22-7.27 (1H, m, Ar-H), 6.56 (1H, s, =CH<sub>2</sub>), 5.00 (1H, s, Ar-CH), 2.50 (1H, qu,  $J$  = 6.8 Hz, -CH(CH<sub>3</sub>)<sub>2</sub>), 2.35 (3H, s, COCH<sub>3</sub>), 1.12 (3H, d,  $J$  = 6.8 Hz, -CH(CH<sub>3</sub>)<sub>2</sub>), 0.83 (3H, d,  $J$  = 6.8 Hz, -CH(CH<sub>3</sub>)<sub>2</sub>); <sup>13</sup>C NMR (CDCl<sub>3</sub>, 100 MHz) for *syn*-**3i**:  $\delta$  197.9, 177.8, 160.6, 145.8, 137.7, 134.1 (d,  $J_{C-F}$  = 1.5 Hz), 132.7, 130.1 (q,  $J_{C-F}$  = 30.0 Hz), 129.0, 128.6, 128.5, 126.7 (q,  $J_{C-F}$  = 3.7 Hz), 125.3, 124.2 (q,  $J_{C-F}$  = 3.7 Hz), 123.8 (q,  $J_{C-F}$  = 270.6 Hz), 79.8, 46.9, 32.3, 25.4, 17.5, 15.3; <sup>19</sup>F NMR (376 MHz, CDCl<sub>3</sub>, CFCl<sub>3</sub>):  $\delta$  -62.8; MS (EI(*syn*-**3i**))  $m/z$  (%) 429 (0.65) [M<sup>+</sup>], 227 (0.91), 202 (23.69), 174 (5.14), 128 (0.71), 115 (3.23), 105 (100.00), 77 (23.72), 51 (2.72), 43 (26.76); HRMS (EI) Calcd for C<sub>24</sub>H<sub>22</sub>F<sub>3</sub>NO<sub>3</sub> [M<sup>+</sup>] requires 429.1552, Found 429.1554; The ee of the *syn*-diastereomer was determined to be 97% [determined by HPLC, Chiralpak AD-H, n-hexane/isopropanol = 90:10, 0.7

mL/min,  $\lambda = 230$  nm, t (major) = 5.38 min, t (minor) = 8.78 min].

**$^1\text{H}$  NMR (400 MHz,  $\text{CDCl}_3$ , TMS) for the crude product**

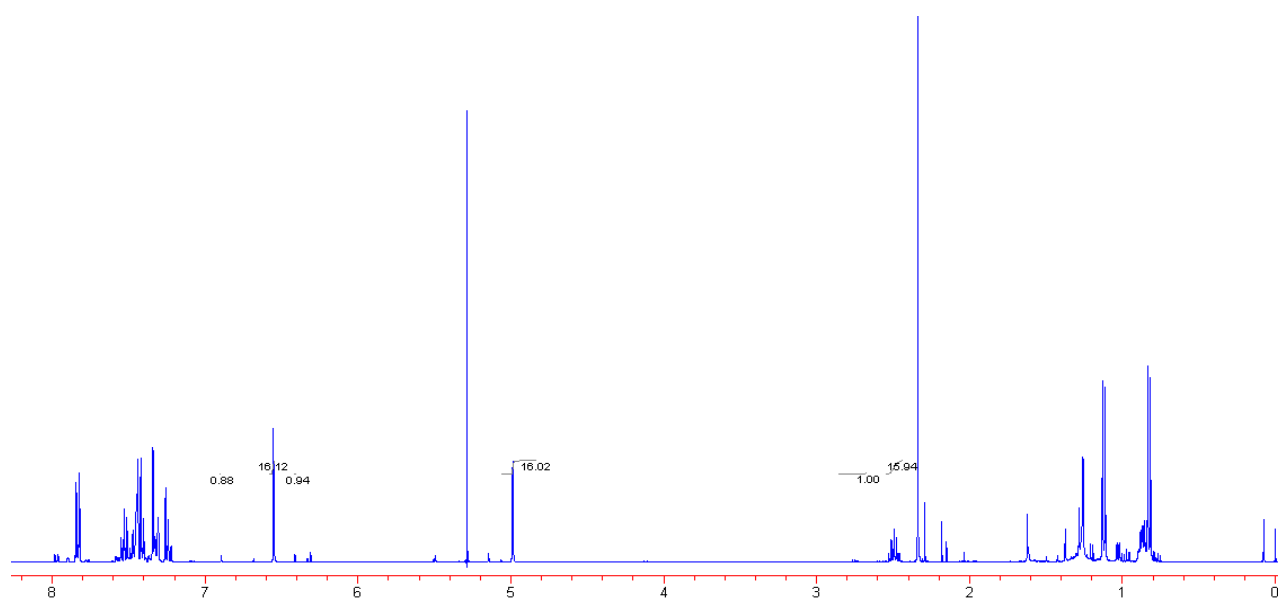

**$^1\text{H}$  NMR (400 MHz,  $\text{CDCl}_3$ , TMS) for the *syn*-diastereomer**

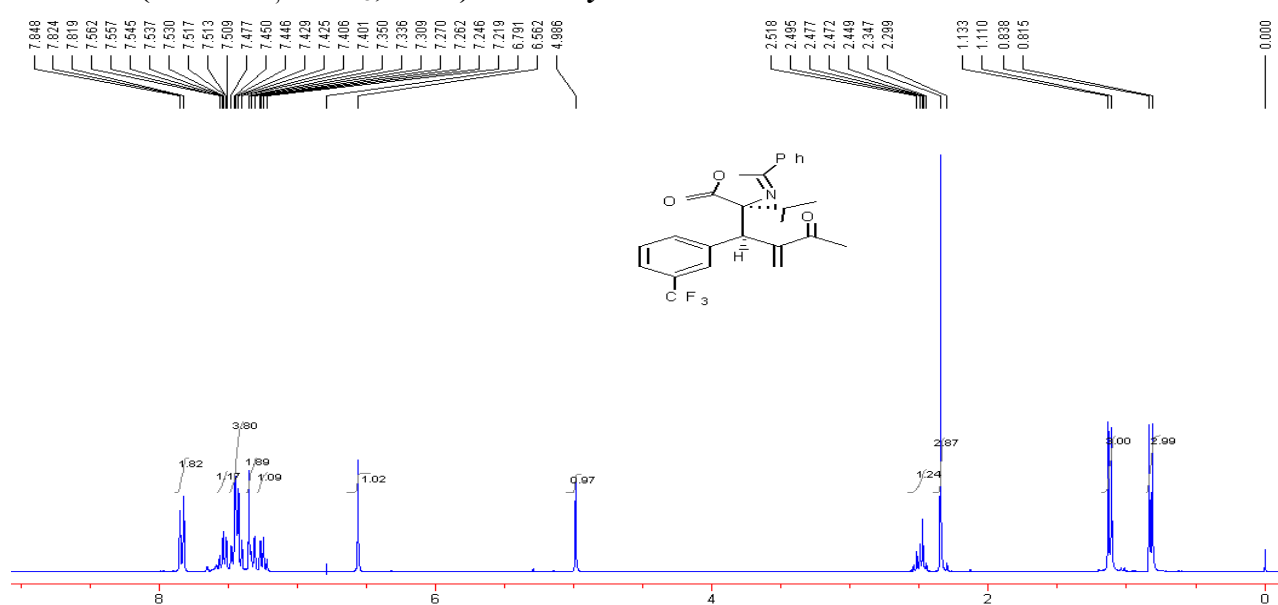

**$^{13}\text{C}$  NMR (100 MHz,  $\text{CDCl}_3$ , TMS) for the *syn*-diastereomer**

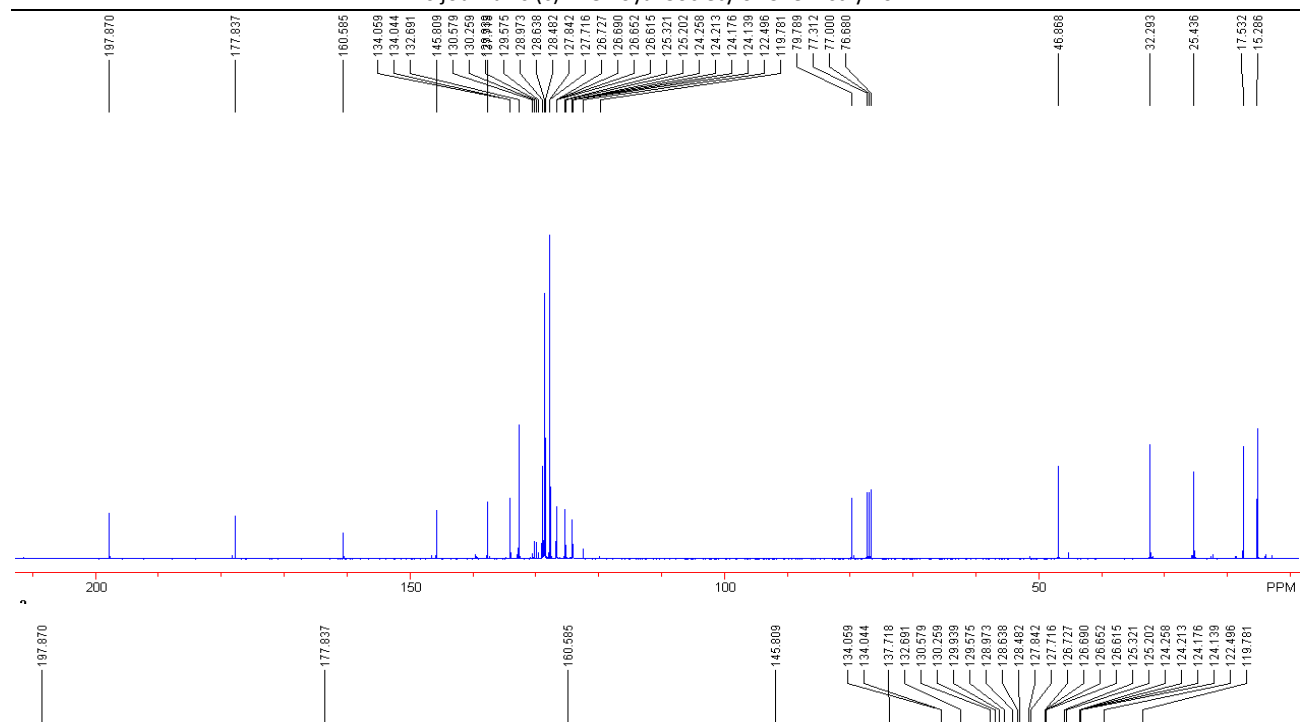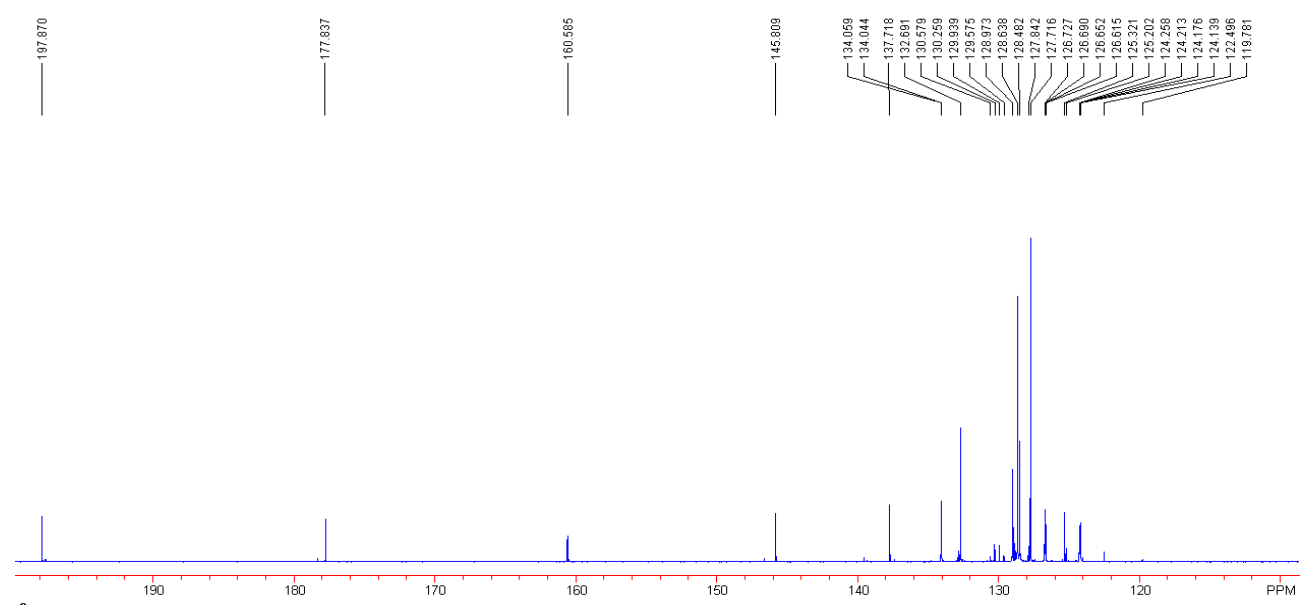

<sup>19</sup>F NMR (376 MHz, CDCl<sub>3</sub>, CFCl<sub>3</sub>) for the *syn*-diastereomer

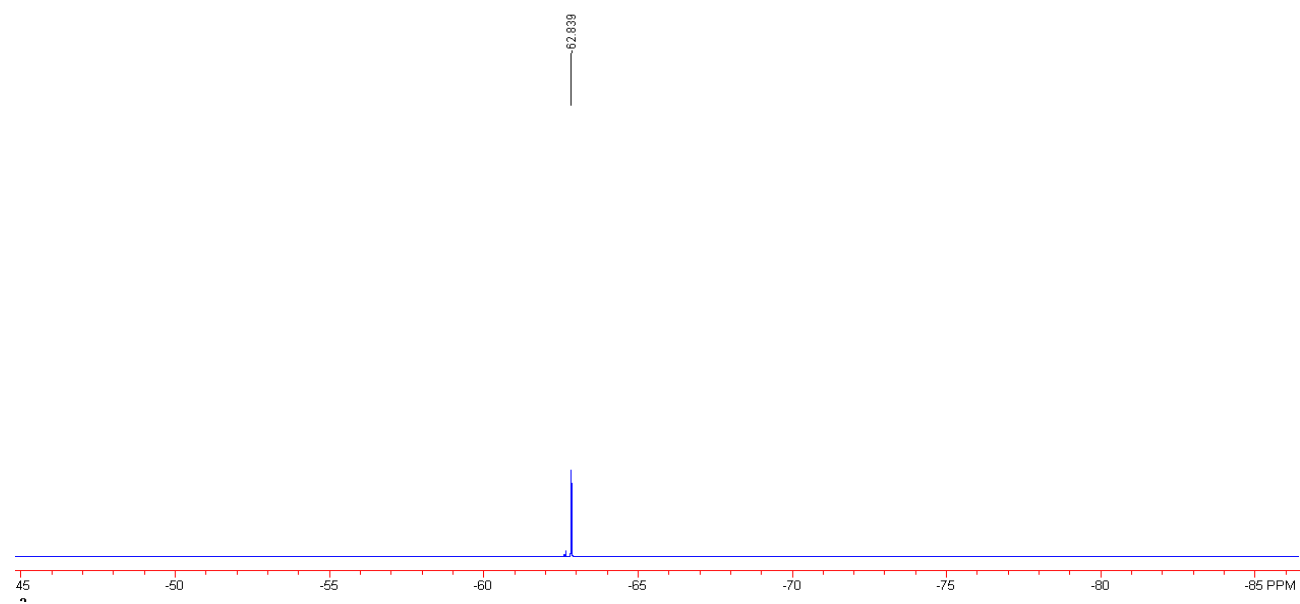



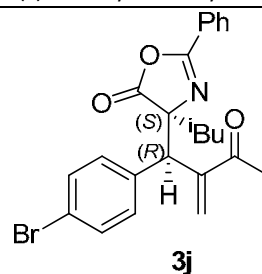

**(S)-4-((R)-1-(4-bromophenyl)-2-methylene-3-oxobutyl)-4-isobutyl-2-phenyloxazol-5(4H)-one**

**3j**: Following the general procedure, the *syn/anti* ratio (3:1) was determined by  $^1\text{H}$  NMR spectroscopic analysis of the crude product ( $\delta$  major: 4.68 ppm,  $\delta$  minor: 4.86 ppm). The mixture was purified by column chromatography using silica gel to give a mixture of diastereoisomer along with trace amount of impurity (38 mg, 84% overall yield in a diastereomeric ratio = 3:1); a white solid. m.p. for *syn-3j* = 123-126 °C;  $[\alpha]_D^{20}$  (*syn-3j*) = -28.1 (c 0.6,  $\text{CHCl}_3$ );  $[\alpha]_D^{20}$  (*anti-3j*) = -2.1 (c 0.4,  $\text{CHCl}_3$ ). IR ( $\text{CH}_2\text{Cl}_2$ ):  $\nu$ (*syn-3j*) 2920, 1808, 1671, 1652, 1486, 1452, 1357, 1318, 1293, 1157, 1242, 1148, 1114, 1073, 1045, 1023, 1014, 988, 975, 928, 891, 853, 818, 779  $\text{cm}^{-1}$ ; IR ( $\text{CH}_2\text{Cl}_2$ ):  $\nu$ (*anti-3j*) 2969, 1816, 1683, 1653, 1487, 1451, 1141, 1320, 1291, 1261, 1216, 1095, 1021, 869.  $^1\text{H}$  NMR (400 MHz,  $\text{CDCl}_3$ , TMS) for *syn-3j*:  $\delta$  7.89-7.87 (2H, m, Ph-H), 7.59-7.55 (1H, m, Ph-H), 7.48-7.44 (2H, m, Ph-H), 7.24 (1H, s, =CH<sub>2</sub>), 7.22-7.19 (2H, m, Ar-H), 7.07-7.04 (2H, m, Ar-H), 6.48 (1H, s, =CH<sub>2</sub>), 4.68 (1H, s, Ar-CH), 2.31 (3H, s,  $\text{COCH}_3$ ), 2.13 (1H, dd,  $J_1 = 14.4$  Hz;  $J_2 = 6.4$  Hz,  $\text{CH}_2\text{CH}(\text{CH}_3)_2$ ), 1.86 (1H, dd,  $J_1 = 14.4$  Hz;  $J_2 = 6.0$  Hz,  $\text{CH}_2\text{CH}(\text{CH}_3)_2$ ), 1.49 (1H, qu,  $J = 6.8$  Hz,  $\text{CH}_2\text{CH}(\text{CH}_3)_2$ ), 0.86 (3H, d,  $J = 6.8$  Hz,  $\text{CH}_2\text{CH}(\text{CH}_3)_2$ ), 0.81 (3H, d,  $J = 6.8$  Hz,  $\text{CH}_2\text{CH}(\text{CH}_3)_2$ );  $^1\text{H}$  NMR (400 MHz,  $\text{CDCl}_3$ , TMS) for *anti-3j*:  $\delta$  8.05-8.03 (2H, m), 7.64-7.60 (1H, m), 7.55-7.49 (4H, m), 7.44-7.41 (2H, m), 6.21 (1H, s), 6.15 (1H, s), 4.86 (1H, s), 2.26 (3H, s), 1.84 (2H, d,  $J = 6.4$  Hz), 1.45 (1H, qu,  $J = 6.8$  Hz), 0.79 (6H, t,  $J = 6.8$  Hz);  $^{13}\text{C}$  NMR (100 MHz,  $\text{CDCl}_3$ ) for *syn-3j*:  $\delta$  198.2, 179.8, 160.1, 146.7, 135.2, 132.7, 131.6, 131.1, 128.8, 128.5, 127.7, 125.5, 121.7, 49.9, 44.1, 25.6, 25.2, 23.8, 23.5;  $^{13}\text{C}$  NMR (100 MHz,  $\text{CDCl}_3$ ) for *anti-3j*:  $\delta$  197.6, 179.8, 160.3, 146.9, 138.1, 132.8, 131.6, 131.4, 129.0, 128.9, 127.9, 125.6, 121.3, 75.9, 47.8, 45.3, 25.3, 25.0, 23.9, 23.3; MS (EI(*syn-3j*))  $m/z$  (%) 453 (0.34) [ $\text{M}^+$ ], 366 (1.68), 239 (25.08), 237 (25.26), 216 (4.96), 202 (6.34), 158 (31.42), 115 (16.91), 105 (100.00), 77 (34.68), 43 (51.45); HRMS (EI) Calcd for  $\text{C}_{24}\text{H}_{24}\text{BrNO}_3$  [ $\text{M}^+$ ] requires 453.0940, Found 453.0941; MS (ESI(*anti-3j*))  $m/e$  454 ( $\text{M}^+\text{+H}$ ); HRMS (ESI) for  $\text{C}_{24}\text{H}_{25}\text{NO}_3\text{Br}$  ( $\text{M}^+\text{+H}$ ): 454.1029, Found: 454.1012; The ee of the *syn*-diastereomer was determined to be 91% [determined by HPLC, Chiralpak AD-H, n-hexane/isopropanol = 90:10, 0.7 mL/min,  $\lambda = 230$  nm, t (major) = 7.55 min, t (minor) = 9.14 min]; The ee of the *anti*-diastereomer was determined to be 98% [determined by HPLC, Chiralpak IC-H, n-hexane/isopropanol = 98:2, 0.3 mL/min,  $\lambda = 230$  nm, t (major) = 41.25 min, t (minor) = 51.36 min].

**$^1\text{H}$  NMR (400 MHz,  $\text{CDCl}_3$ , TMS) for the crude product**

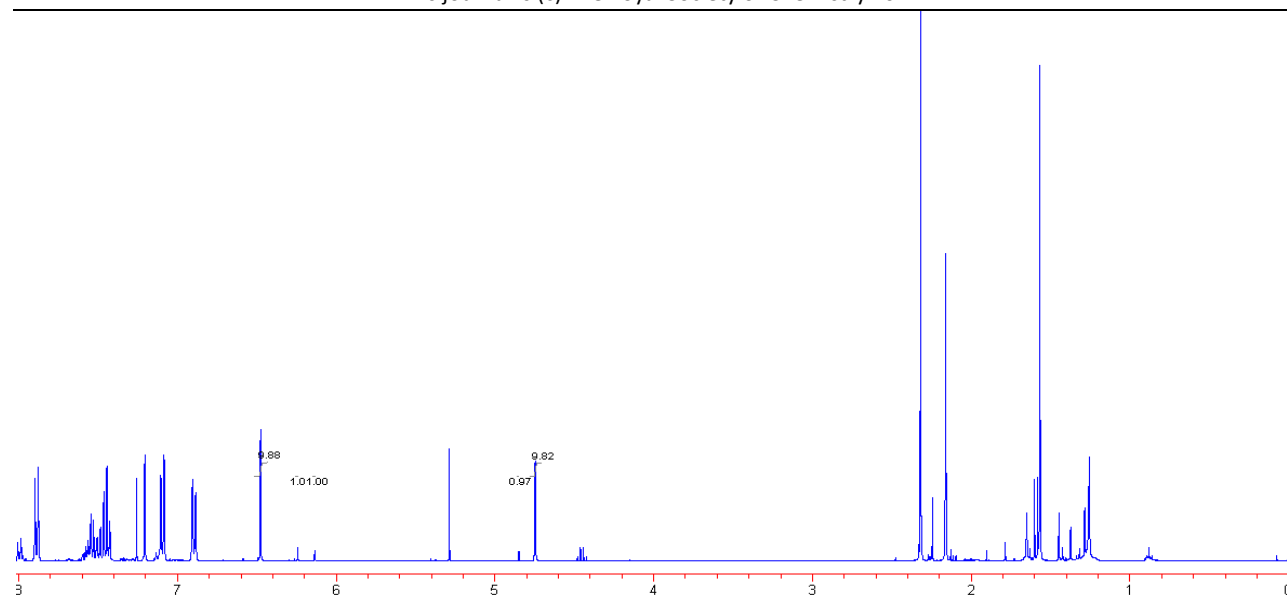

**<sup>1</sup>H NMR (400 MHz, CDCl<sub>3</sub>, TMS) for the *syn*-diastereomer**

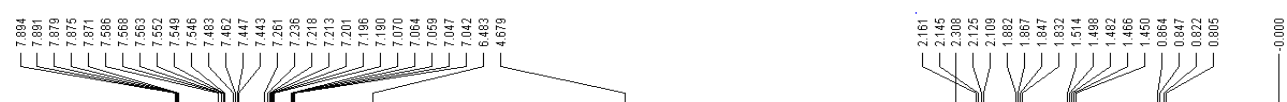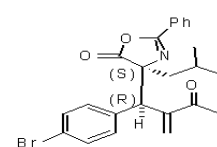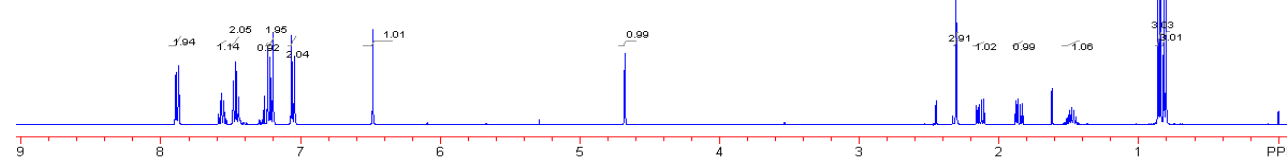

**<sup>13</sup>C NMR (100 MHz, CDCl<sub>3</sub>, TMS) for the *syn*-diastereomer**

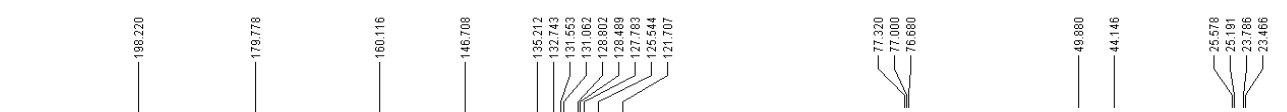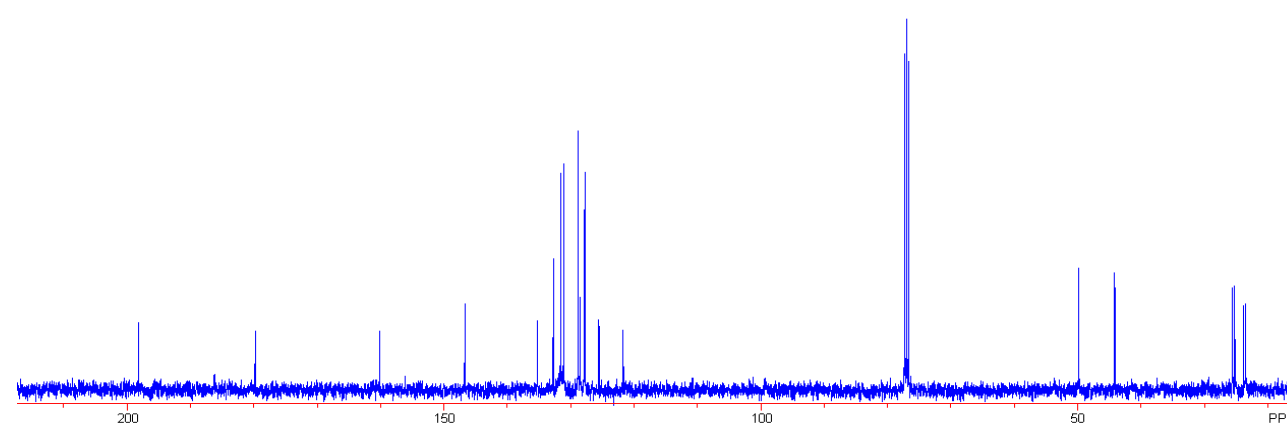

**<sup>1</sup>H NMR (400 MHz, CDCl<sub>3</sub>, TMS) for the *anti*-diastereomer (containing some impurities)**

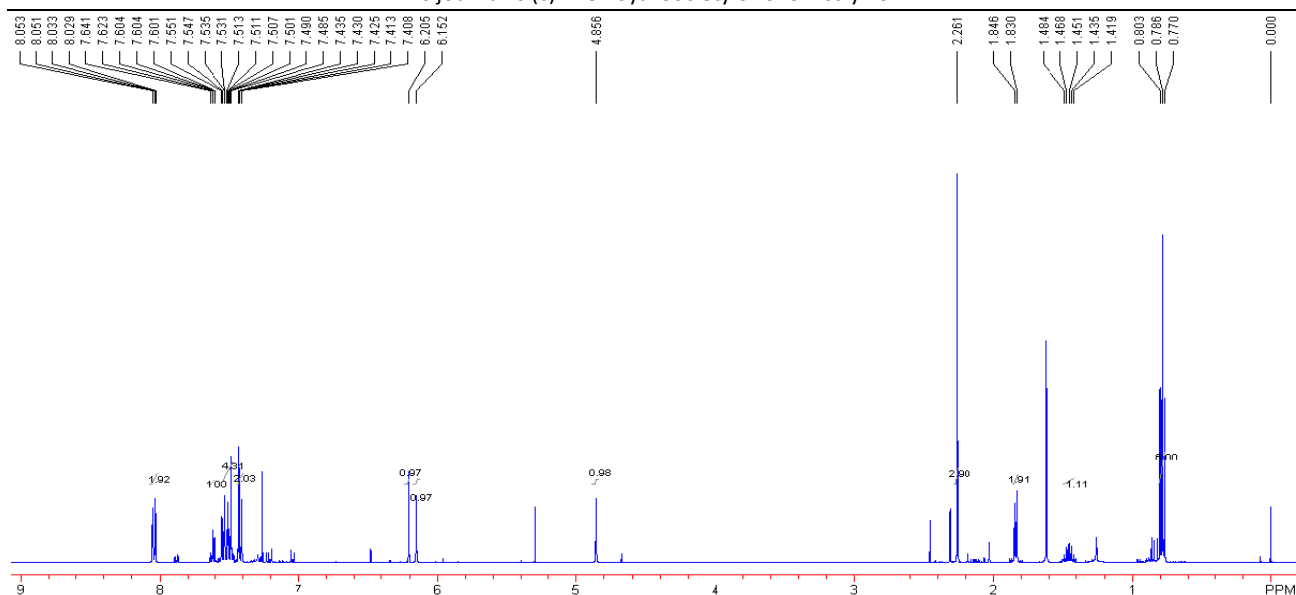

<sup>13</sup>C NMR (100 MHz, CDCl<sub>3</sub>, TMS) for the *anti*-diastereomer (containing some impurities)

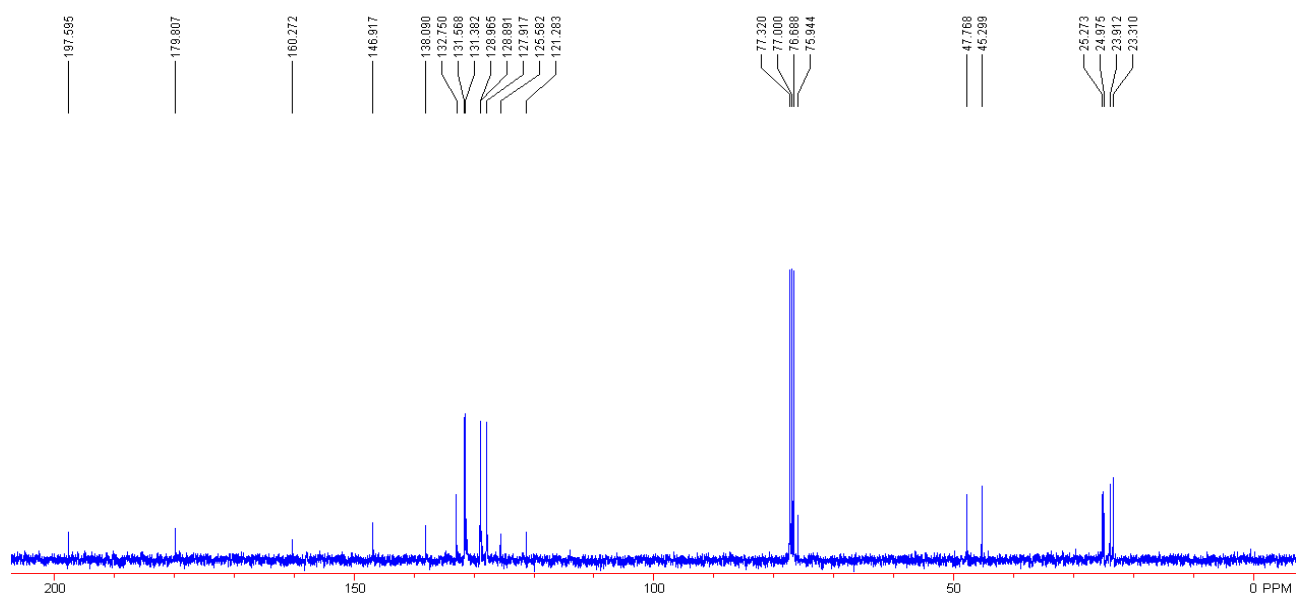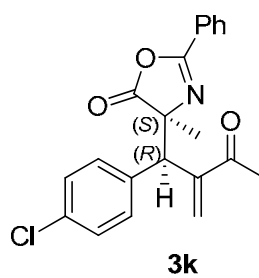

**(S)-4-((R)-1-(4-chlorophenyl)-2-methylene-3-oxobutyl)-4-methyl-2-phenyloxazol-5(4H)-one 3k:**

Following the general procedure, the *syn/anti* ratio (4:1) was determined by <sup>1</sup>H NMR spectroscopic analysis of the crude product ( $\delta$  major: 4.75 ppm,  $\delta$  minor: 4.86 ppm). The mixture was purified by column chromatography using silica gel to give a mixture of diastereoisomers along with trace amount of impurity (33 mg, 90% overall yield in a diastereomeric ratio = 4:1); a white solid. m.p. for *syn*-**3k** = 123-125 °C;  $[\alpha]_D^{20}$  (*syn*-**3k**) = -0.7 (c 0.7, CHCl<sub>3</sub>);  $[\alpha]_D^{20}$  (*anti*-**3k**) = -11.2 (c 0.4, CHCl<sub>3</sub>). IR(CH<sub>2</sub>Cl<sub>2</sub>):  $\nu$ (*syn*-**3k**) 1818, 1789, 1658, 1620, 1492, 1450, 1323, 1295, 1168, 1092, 1072,

1017, 982, 898, 818, 782  $\text{cm}^{-1}$ ; IR( $\text{CH}_2\text{Cl}_2$ ):  $\nu(\text{anti-3k})$  2958, 2925, 2854, 1822, 1742, 1683, 1652, 1491, 1452, 1375, 1292, 1259, 1216, 1199, 1091, 917, 876.  $^1\text{H}$  NMR (400 MHz,  $\text{CDCl}_3$ , TMS) for *syn-3k*:  $\delta$  7.90-7.87 (2H, m, Ph-H), 7.58-7.54 (1H, m, Ph-H), 7.47-7.43 (2H, m, Ph-H), 7.25 (1H, s, =CH<sub>2</sub>), 7.16-7.13 (2H, m, Ar-H), 7.08-7.06 (2H, m, Ar-H), 6.52 (1H, s, =CH<sub>2</sub>), 4.75 (1H, s, Ar-CH), 2.33 (3H, s, COCH<sub>3</sub>), 1.58 (3H, s, PhCH<sub>3</sub>);  $^1\text{H}$  NMR (400 MHz,  $\text{CDCl}_3$ , TMS) for *anti-3k*:  $\delta$  8.05-8.03 (2H, m), 7.64-7.51 (5H, m), 7.31-7.29 (2H, m), 6.23 (1H, s), 6.16 (1H, s), 4.86 (1H, s), 2.26 (3H, s), 1.45 (3H, s);  $^{13}\text{C}$  NMR (100 MHz,  $\text{CDCl}_3$ ) for *syn-3k*:  $\delta$  198.3, 179.7, 160.2, 146.2, 135.1, 133.4, 132.8, 131.0, 128.7, 128.5, 128.1, 127.8, 125.5, 72.9, 48.9, 25.5, 22.5;  $^{13}\text{C}$  NMR (100 MHz,  $\text{CDCl}_3$ ) for *anti-3k*:  $\delta$  179.6, 179.7, 160.5, 147.4, 136.9, 133.2, 133.0, 131.1, 128.9, 128.6, 128.3, 127.9, 125.6, 72.0, 47.0, 25.3, 23.9; MS (EI)  $m/z$  (%) 367 (2.11) [ $\text{M}^+$ ], 339 (1.06), 195 (19.54), 193 (58.52), 158 (3.08), 151 (3.21), 141 (2.81), 115 (21.09), 105 (69.94), 77 (44.95), 43 (100); HRMS (EI(*syn-3k*)) Calcd for  $\text{C}_{21}\text{H}_{18}\text{ClNO}_3$  [ $\text{M}^+$ ] requires 367.0975, Found 367.0973; MS (ESI(*anti-3k*))  $m/e$  368 ( $\text{M}^+\text{+H}$ ); HRMS (ESI) for  $\text{C}_{21}\text{H}_{19}\text{NO}_3\text{Cl}$  ( $\text{M}^+\text{+H}$ ): 368.1057, Found: 368.1048; The ee of the *syn*-diastereomer was determined to be 97% [determined by HPLC, Chiralpak AD-H, n-hexane/isopropanol = 90:10, 0.7 mL/min,  $\lambda$  = 230 nm, t (major) = 9.13 min, t (minor) = 12.97 min]; The ee of the *anti*-diastereomer was determined to be 90% [determined by HPLC, Chiralpak IC-H, n-hexane/isopropanol = 95:5, 0.7 mL/min,  $\lambda$  = 230 nm, t (major) = 15.92 min, t (minor) = 17.68 min].

**$^1\text{H}$  NMR (400 MHz,  $\text{CDCl}_3$ , TMS) for the crude product**

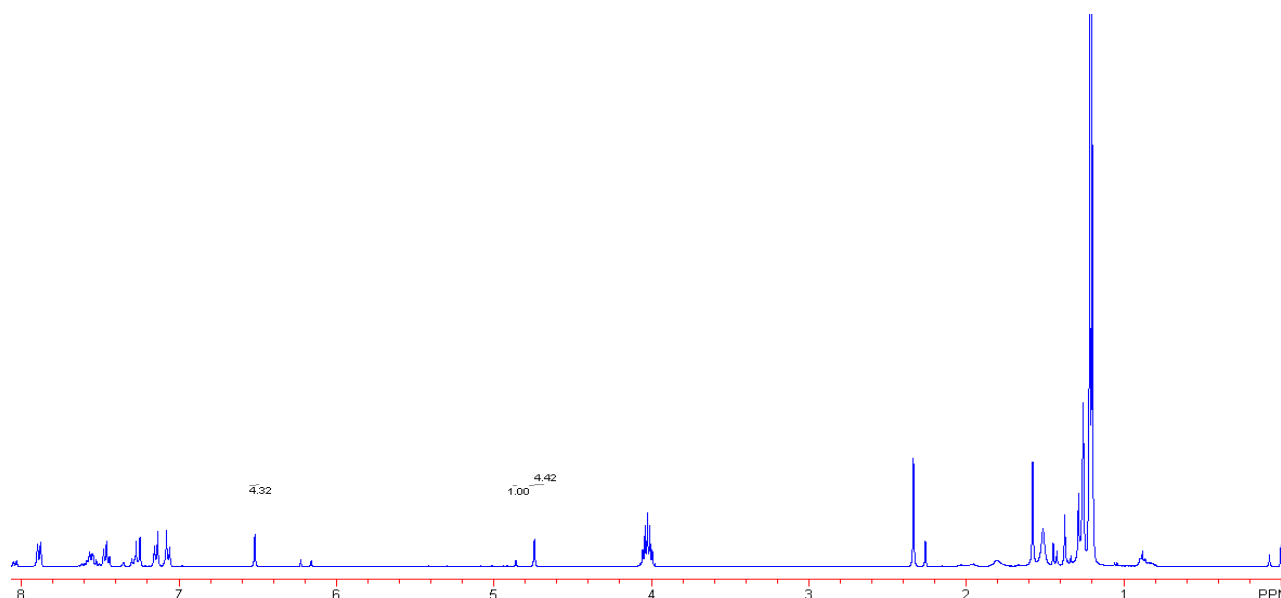

**$^1\text{H}$  NMR (400 MHz,  $\text{CDCl}_3$ , TMS) for the *syn*-diastereomer**

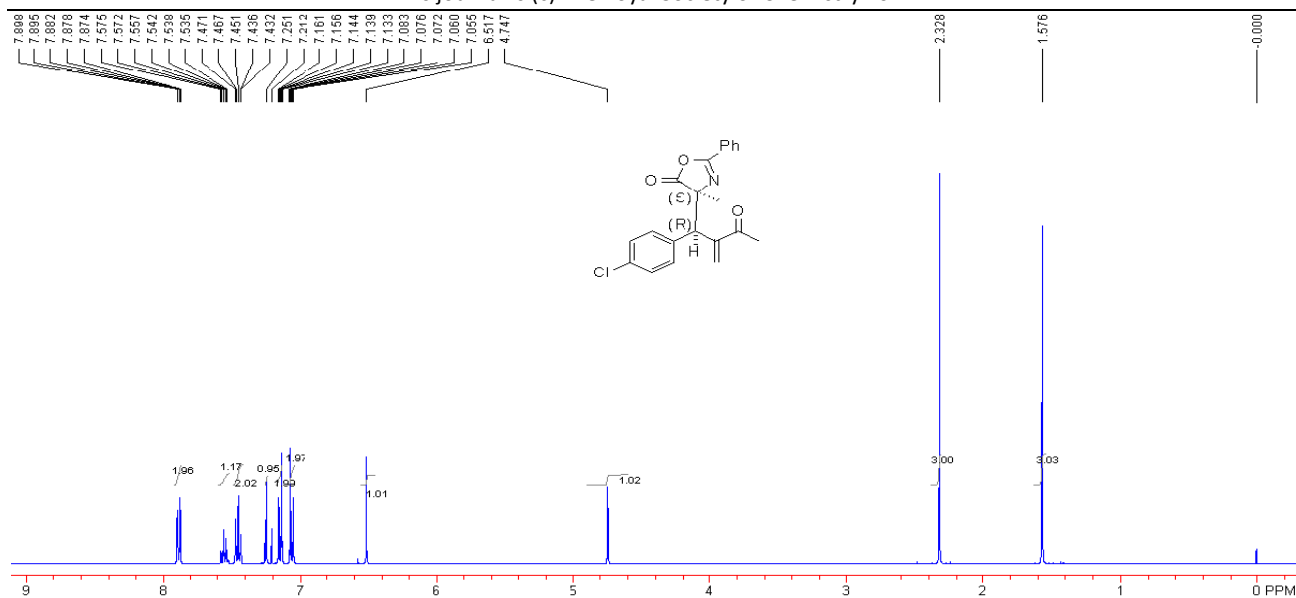**<sup>13</sup>C NMR (100 MHz, CDCl<sub>3</sub>, TMS) for the *syn*-diastereomer**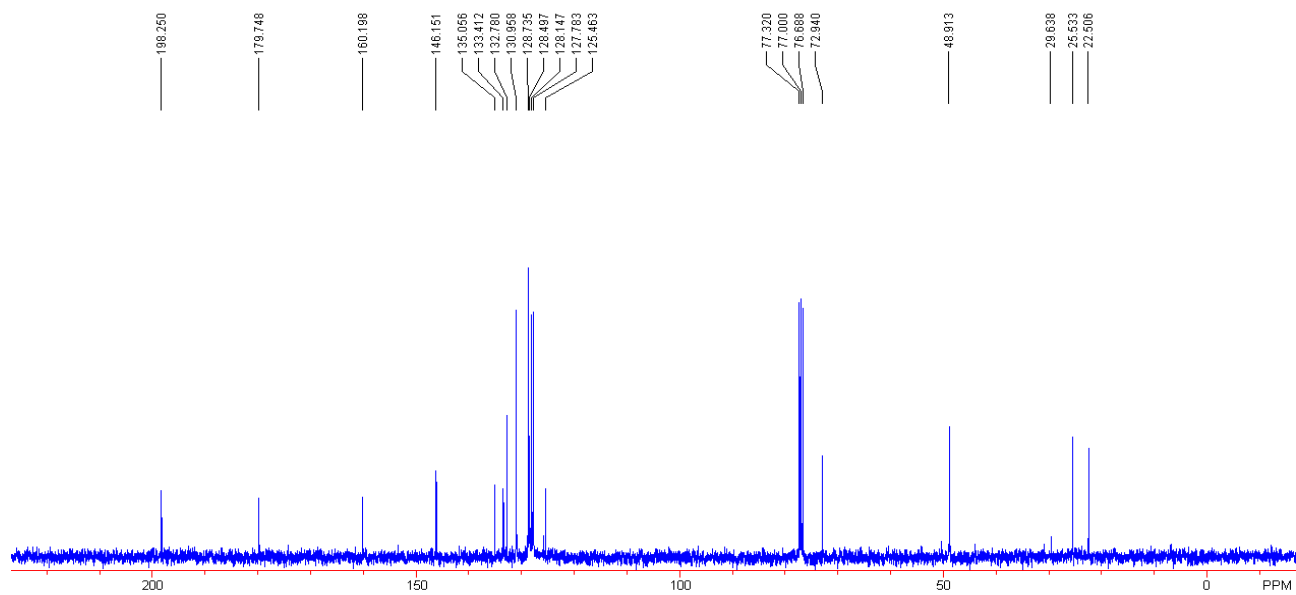**<sup>1</sup>H NMR (400 MHz, CDCl<sub>3</sub>, TMS) for the *anti*-diastereomer**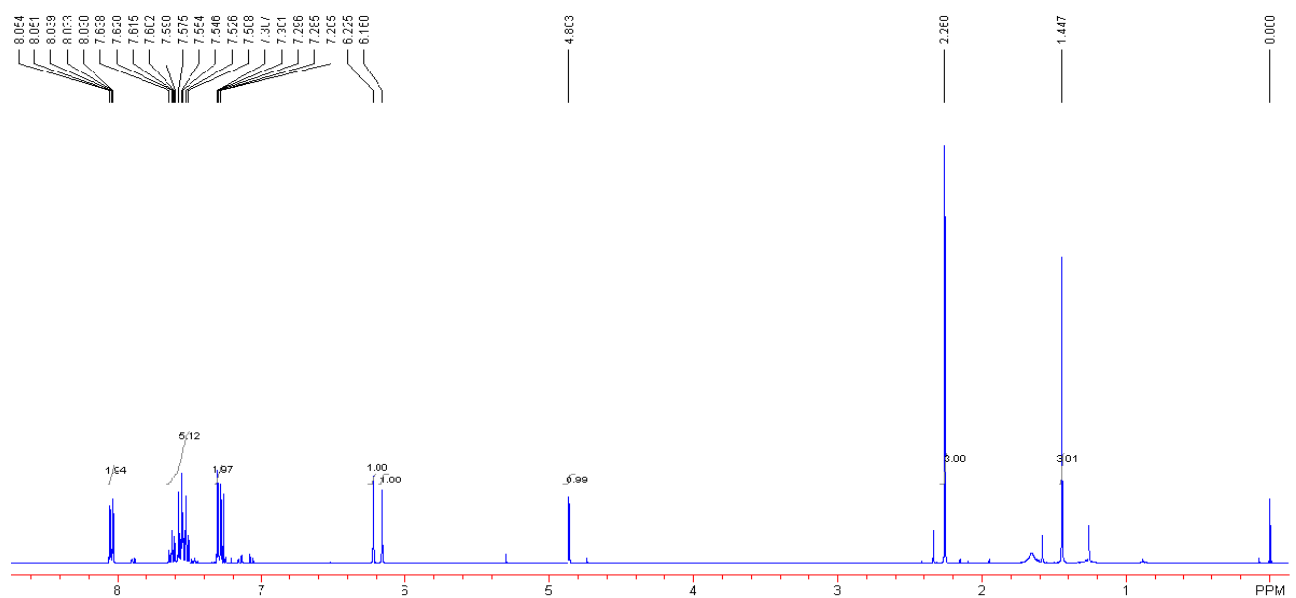**<sup>13</sup>C NMR (100 MHz, CDCl<sub>3</sub>, TMS) for the *syn*-diastereomer**

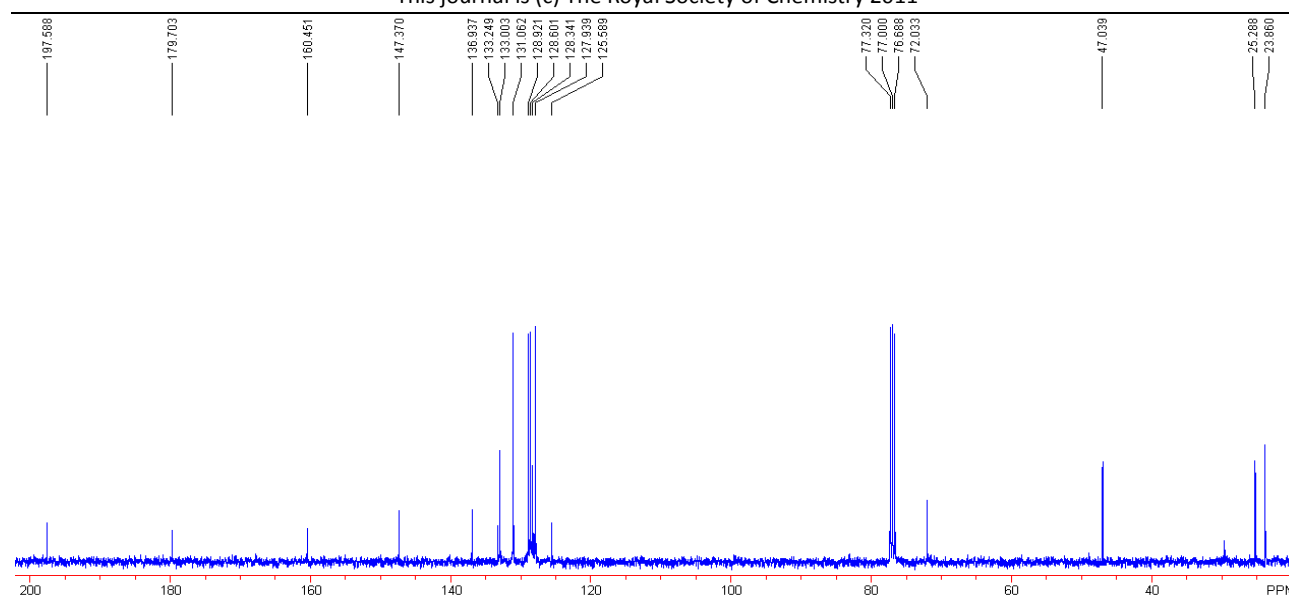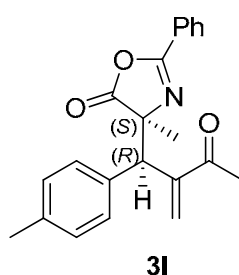

**(S)-4-methyl-4-((R)-2-methylene-3-oxo-1-*p*-tolylbutyl)-2-phenyloxazol-5(4H)-one 31:** Following the general procedure, the *syn/anti* ratio (10:1) was determined by  $^1\text{H}$  NMR spectroscopic analysis of the crude product ( $\delta$  major: 4.75 ppm,  $\delta$  minor: 5.29 ppm). The mixture was purified by column chromatography using silica gel to give a mixture of diastereoisomer along with trace amount of impurity (31 mg, 90% overall yield in a diastereomeric ratio = 10:1); a white solid. m.p. for *syn*-**31** = 113-114 °C;  $[\alpha]_D^{20}$  (*syn*-**31**) = +13.2 (c 0.9,  $\text{CHCl}_3$ ). IR ( $\text{CH}_2\text{Cl}_2$ ):  $\nu$  2924, 1820, 1672, 1651, 1450, 1289, 1170, 1008, 969, 900, 814, 721  $\text{cm}^{-1}$ ;  $^1\text{H}$  NMR (400 MHz,  $\text{CDCl}_3$ , TMS):  $\delta$  7.90-7.8 (2H, m, Ph-H), 7.57-7.53 (1H, m, Ph-H), 7.47-7.43 (2H, m, Ph-H), 7.21 (1H, s, = $\text{CH}_2$ ), 7.09 (2H, dd,  $J_1$  = 6.4 Hz;  $J_2$  = 2.0 Hz, Ar-H), 6.90 (2H, d,  $J$  = 7.6 Hz, Ar-H), 6.45 (1H, s, = $\text{CH}_2$ ), 4.75 (1H, s, Ar-CH), 2.32 (3H, s,  $\text{COCH}_3$ ), 2.17 (3H, s,  $\text{ArCH}_3$ ), 1.58 (3H, s,  $\text{PhCH}_3$ );  $^{13}\text{C}$  NMR (100 MHz,  $\text{CDCl}_3$ ) for *syn*-**31**:  $\delta$  198.5, 180.0, 160.0, 146.6, 137.0, 133.4, 132.5, 129.4, 128.7, 128.6, 128.1, 127.8, 125.8, 73.2, 49.2, 25.5, 22.5, 20.9; MS (EI(*syn*-**31**))  $m/z$  (%) 347(1.42) [ $\text{M}^+$ ], 319 (1.82), 173 (74.97), 141 (3.11), 131 (14.80), 115 (12.13), 105 (37.01), 97 (3.87), 77 (34.49), 43 (100); HRMS (EI) Calcd for  $\text{C}_{22}\text{H}_{21}\text{NO}_3$  [ $\text{M}^+$ ] requires 347.1521, Found 347.1523; The ee of the *syn*-diastereomer was determined to be 96% [determined by HPLC, Chiralpak AD-H, n-hexane/isopropanol = 90:10, 0.7 mL/min,  $\lambda$  = 230 nm, t (major) = 8.52 min, t (minor) = 11.32 min].

**$^1\text{H}$  NMR (400 MHz,  $\text{CDCl}_3$ , TMS) for the crude product**

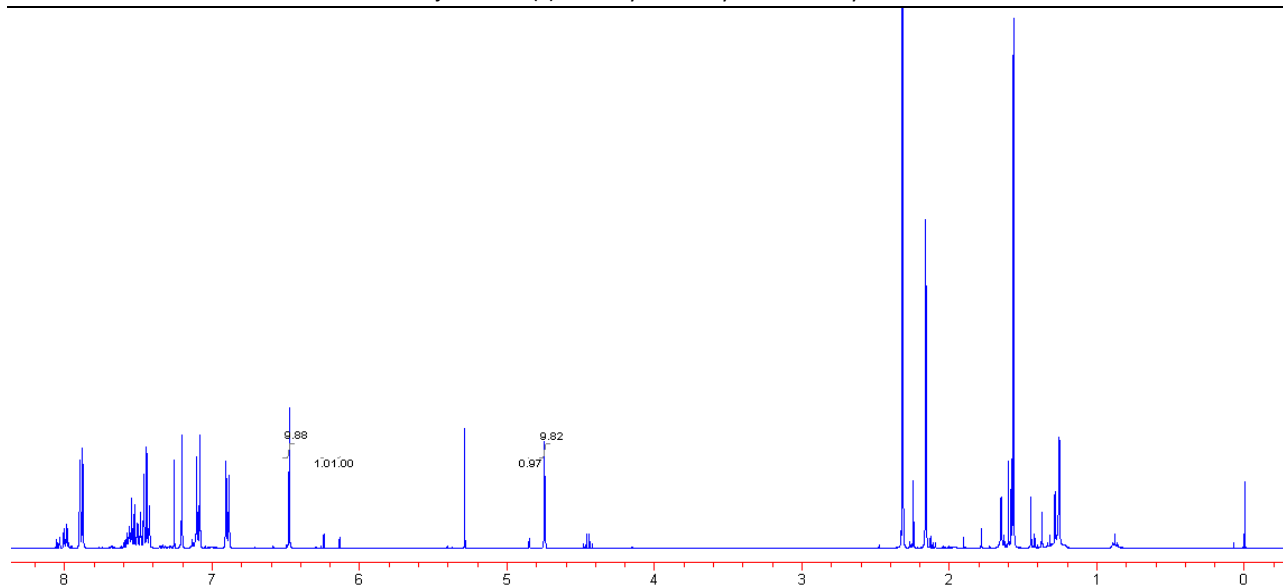

**<sup>1</sup>H NMR (400 MHz, CDCl<sub>3</sub>, TMS) for the *syn*-diastereomer**

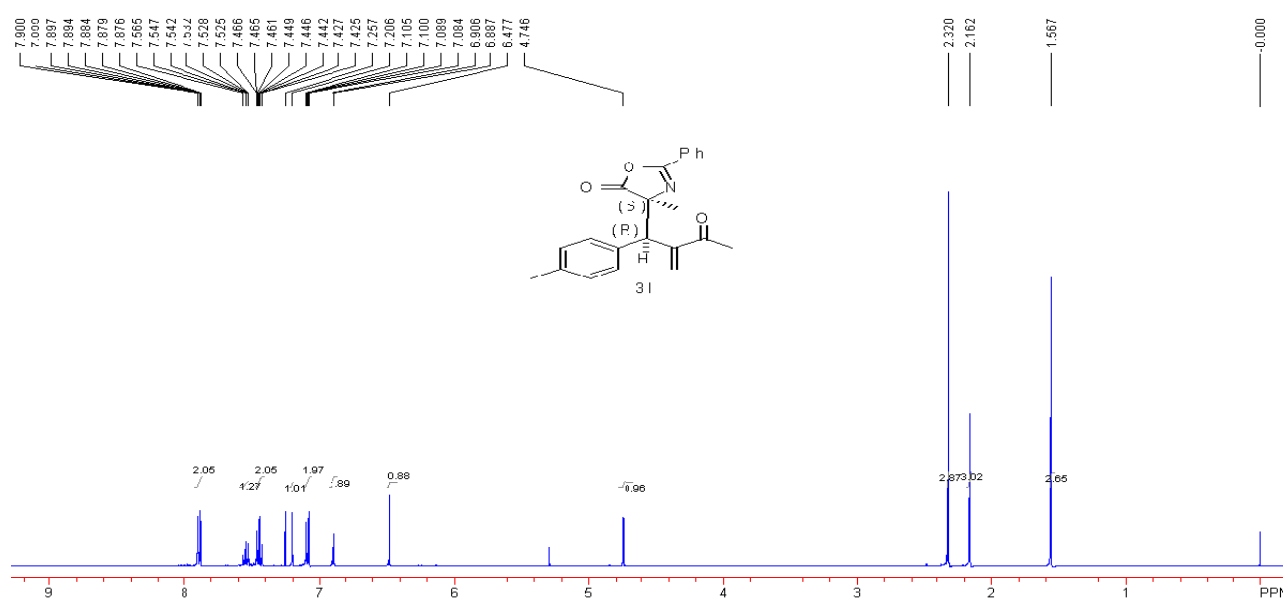

**<sup>13</sup>C NMR (100 MHz, CDCl<sub>3</sub>, TMS) for the *syn*-diastereomer**

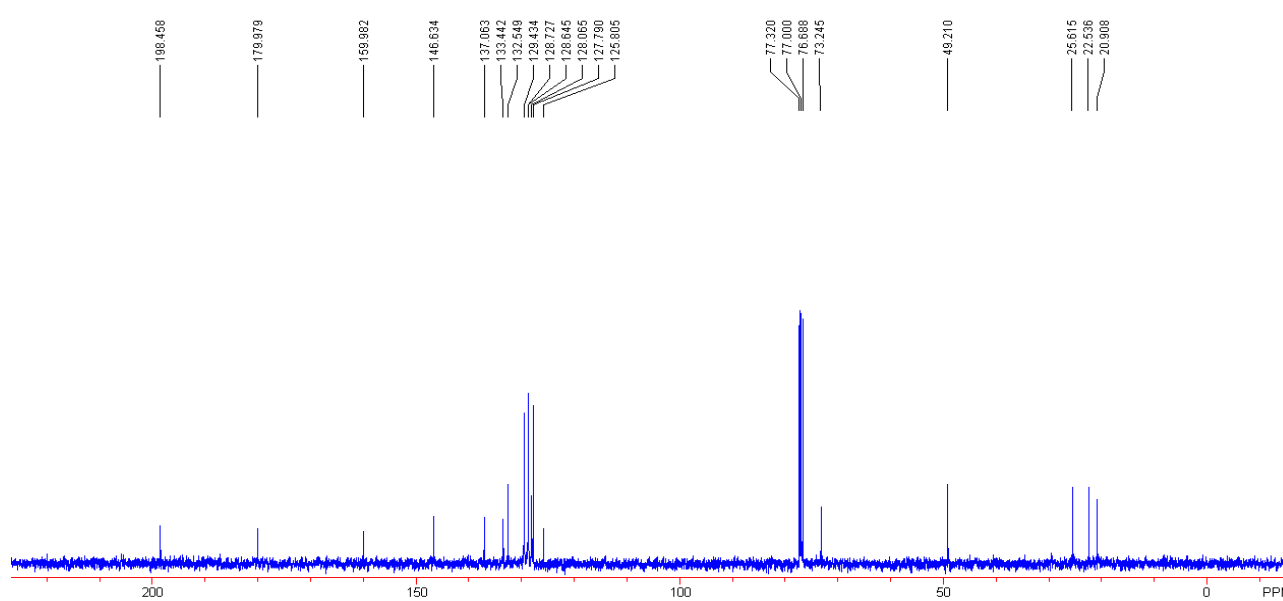

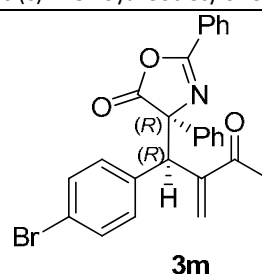

**(R)-4-((R)-1-(4-bromophenyl)-2-methylene-3-oxobutyl)-2,4-diphenyloxazol-5(4H)-one 3m:**

Following the general procedure, the *syn/anti* ratio (7:1) was determined by  $^1\text{H}$  NMR spectroscopic analysis of the crude product ( $\delta$  major: 6.25 ppm,  $\delta$  minor: 6.22 ppm). The mixture was purified by column chromatography using silica gel to give a mixture of diastereoisomers along with trace amount of impurity (40 mg, 85% overall yield in a diastereomeric ratio = 7:1); a white solid. m.p. for *syn-3m* = 93-95 °C;  $[\alpha]_D^{20}$  (*syn-3m*) = -192.6 (c 0.6,  $\text{CHCl}_3$ ). IR ( $\text{CH}_2\text{Cl}_2$ ):  $\nu$  2922, 1809, 1650, 1486, 1449, 1365, 1324, 1297, 1065, 1011, 988, 961, 925, 905, 883, 814, 786  $\text{cm}^{-1}$ ;  $^1\text{H}$  NMR (400 MHz,  $\text{CDCl}_3$ , TMS):  $\delta$  7.97 (2H, d,  $J = 7.2$  Hz, Ar-H), 7.65-7.58 (3H, m, Ar-H), 7.49 (2H, t,  $J = 6.8$  Hz, Ar-H), 7.35-7.20 (7H, m, Ar-H), 7.07 (1H, s, =CH<sub>2</sub>), 6.25 (1H, s, =CH<sub>2</sub>), 5.37 (1H, s, Ar-CH), 2.12 (3H, s, COCH<sub>3</sub>);  $^{13}\text{C}$  NMR (100 MHz,  $\text{CDCl}_3$ ) for *syn-3m*:  $\delta$  198.1, 177.7, 161.0, 145.5, 136.8, 134.8, 133.1, 131.9, 131.1, 129.3, 128.9, 128.7, 128.4, 128.0, 126.0, 125.3, 121.9, 77.4, 50.6, 25.4; MS (EI(*syn-3m*))  $m/z$  (%) 428.(56.76) [ $\text{M}^+ - \text{COCH}_3$ ], 386 (100.00), 307 (16.38), 304 (37.96), 227 (16.95), 202 (88.69), 193 (10.03), 173 (21.15), 152 (16.34), 105 (67.55), 77 (37.81), 43 (56.29); HRMS (EI) Calcd for  $\text{C}_{26}\text{H}_{20}\text{BrNO}_3$  [ $\text{M}^+$ ] requires 473.0627, Found 473.0625; The ee of the *syn*-diastereomer was determined to be 92% [determined by HPLC, Chiralpak AD-H, n-hexane/isopropanol = 90:10, 0.7 mL/min,  $\lambda = 230$  nm,  $t$  (major) = 13.75 min,  $t$  (minor) = 14.80 min].

**$^1\text{H}$  NMR (400 MHz,  $\text{CDCl}_3$ , TMS) for the crude product**

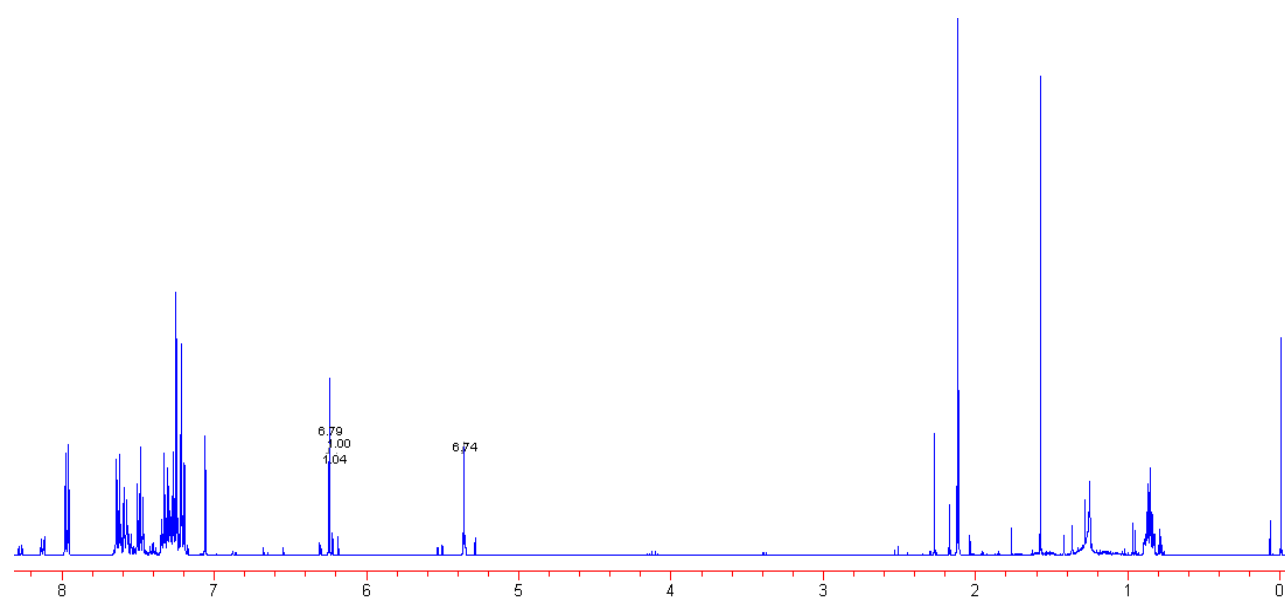

**$^1\text{H}$  NMR (400 MHz,  $\text{CDCl}_3$ , TMS) for the *syn*-diastereomer**



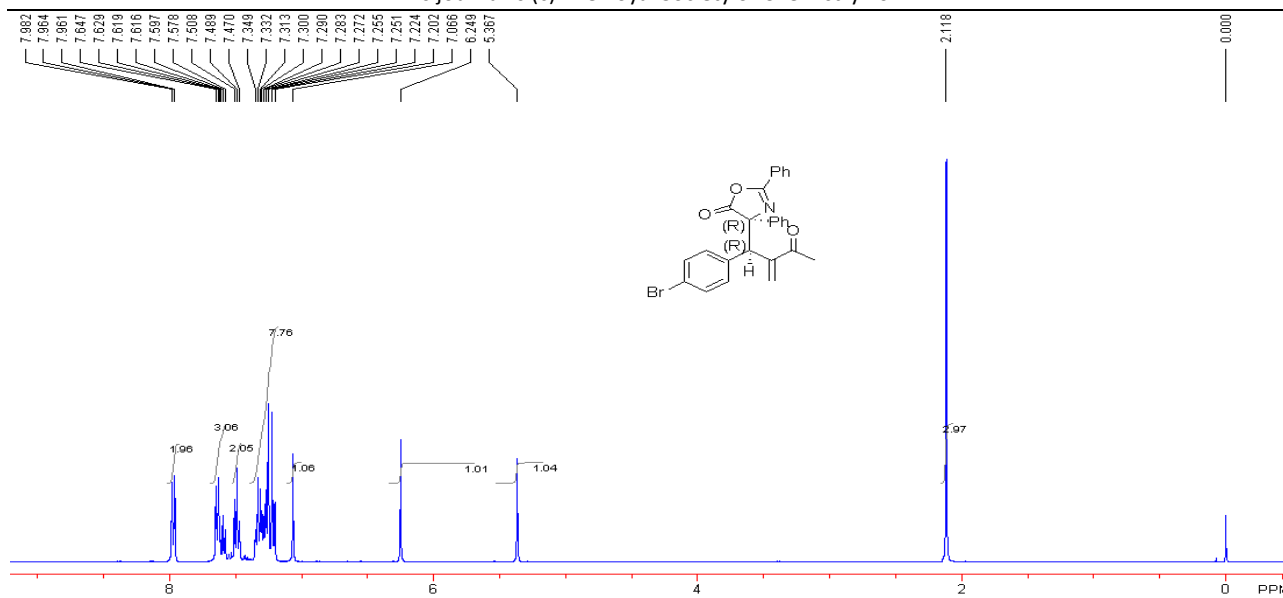**<sup>13</sup>C NMR (100 MHz, CDCl<sub>3</sub>, TMS) for the *syn*-diastereomer**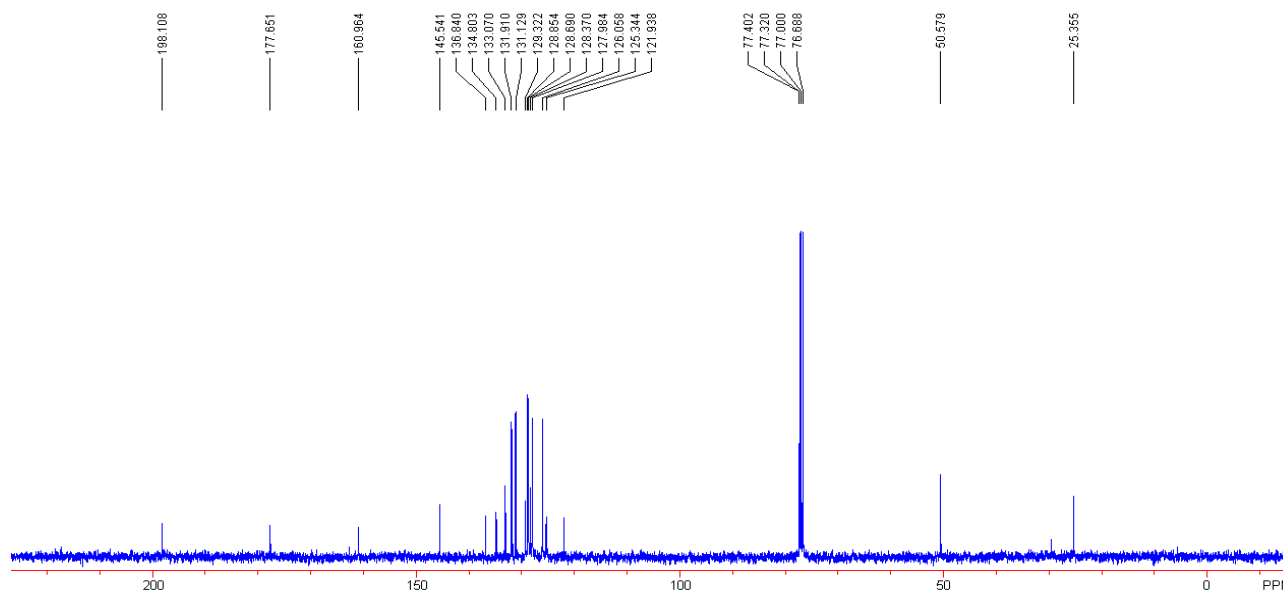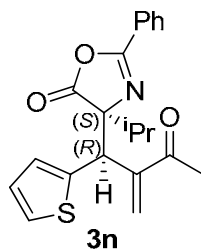**(S)-4-isopropyl-4-((R)-2-methylene-3-oxo-1-(thiophen-2-yl)butyl)-2-phenyloxazol-5(4H)-one**

**3n**: Following the general procedure, the *syn/anti* ratio (12:1) was determined by <sup>1</sup>H NMR spectroscopic analysis of the crude product ( $\delta$  major: 5.35 ppm,  $\delta$  minor: 5.70 ppm). The mixture was purified by column chromatography using silica gel to give a mixture of diastereoisomers along with trace amount of impurity (35 mg, 95% overall yield in a diastereomeric ratio = 12:1); a white solid. m.p. for *syn-3n* = 78-80 °C;  $[\alpha]_D^{20}$  (*syn-3n*) = -79.5 (c 0.4, CHCl<sub>3</sub>). IR (CH<sub>2</sub>Cl<sub>2</sub>):  $\nu$  2922, 1817, 1653, 1622, 1451, 1427, 1390, 1361, 1336, 1322, 1293, 1254, 1234, 1198, 1156, 1111, 1069, 1042, 1020, 967, 904, 879, 856, 783 cm<sup>-1</sup>; <sup>1</sup>H NMR (300 MHz, CDCl<sub>3</sub>, TMS) for *syn-3n*:  $\delta$  7.96-7.92 (2H,

m, Ph-H), 7.59-7.54 (1H, m, Ph-H), 7.49-7.44 (2H, m, Ph-H), 7.21 (1H, s, =CH<sub>2</sub>), 7.01 (1H, d, *J* = 7.2 Hz, thiophen-H), 6.94 (1H, d, *J* = 3.0 Hz, thiophen-H), 6.76 (1H, dd, *J*<sub>1</sub> = 6.8 Hz; *J*<sub>2</sub> = 3.2 Hz, thiophen-H), 6.47 (1H, s, =CH<sub>2</sub>), 5.35 (1H, s, Ar-CH), 2.32-2.45 (4H, m, COCH<sub>3</sub>, CH(CH<sub>3</sub>)<sub>2</sub>), 1.09 (3H, d, *J* = 6.6 Hz, CH(CH<sub>3</sub>)<sub>2</sub>), 0.84 (3H, d, *J* = 6.6 Hz, CH(CH<sub>3</sub>)<sub>2</sub>); <sup>13</sup>C NMR (75 MHz, CDCl<sub>3</sub>) for *syn*-**3n**: δ 197.8, 178.0, 160.9, 146.7, 140.3, 132.6, 129.4, 128.7, 128.0, 127.9, 126.3, 125.7, 80.3, 41.6, 32.6, 25.5, 17.6, 15.4; MS (EI(*syn*-**3n**)) *m/z* (%) 367 (1.45) [M<sup>+</sup>], 339 (1.65), 324 (2.02), 165 (89.62), 123 (23.90), 105 (57.74), 97 (3.87), 77 (43.30), 57 (6.77), 43 (100); HRMS (EI) Calcd for C<sub>21</sub>H<sub>20</sub>NO<sub>3</sub>S [M<sup>+</sup>] requires 367.1242, Found 367.1248; The ee of the *syn*-diastereomer was determined to be 95% [determined by HPLC, Chiralpak AD-H, n-hexane/isopropanol = 90:10, 0.7 mL/min, λ = 230 nm, t (major) = 6.91 min, t (minor) = 8.57 min].

**<sup>1</sup>H NMR (400 MHz, CDCl<sub>3</sub>, TMS) for the crude product**

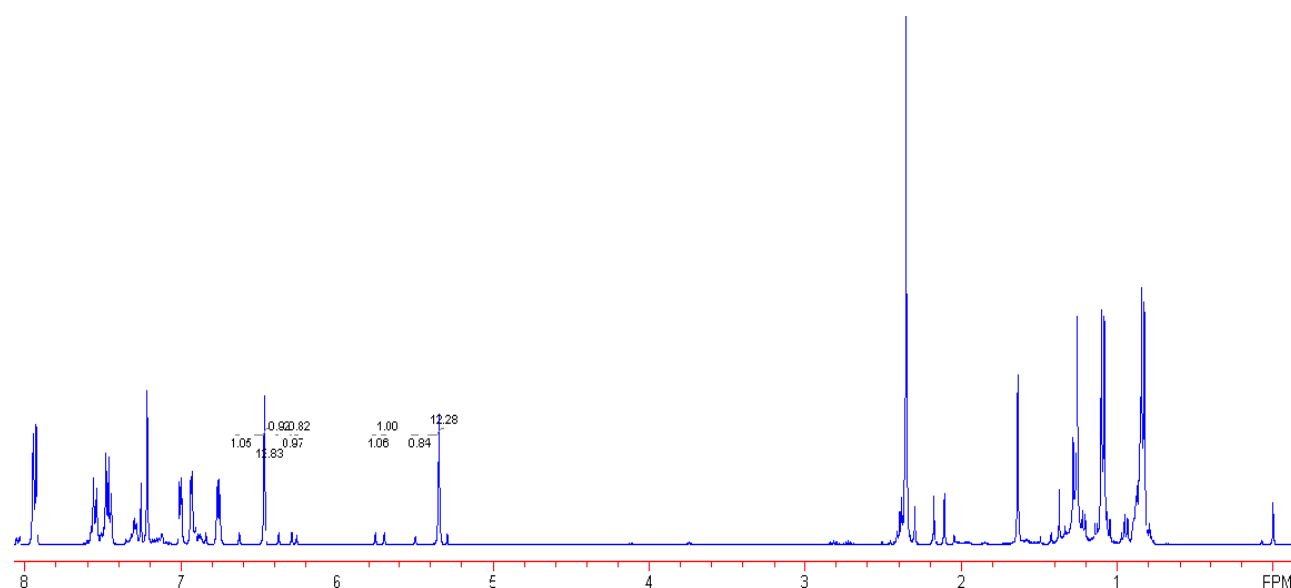

**<sup>1</sup>H NMR (300 MHz, CDCl<sub>3</sub>, TMS) for the *syn*-diastereomer**

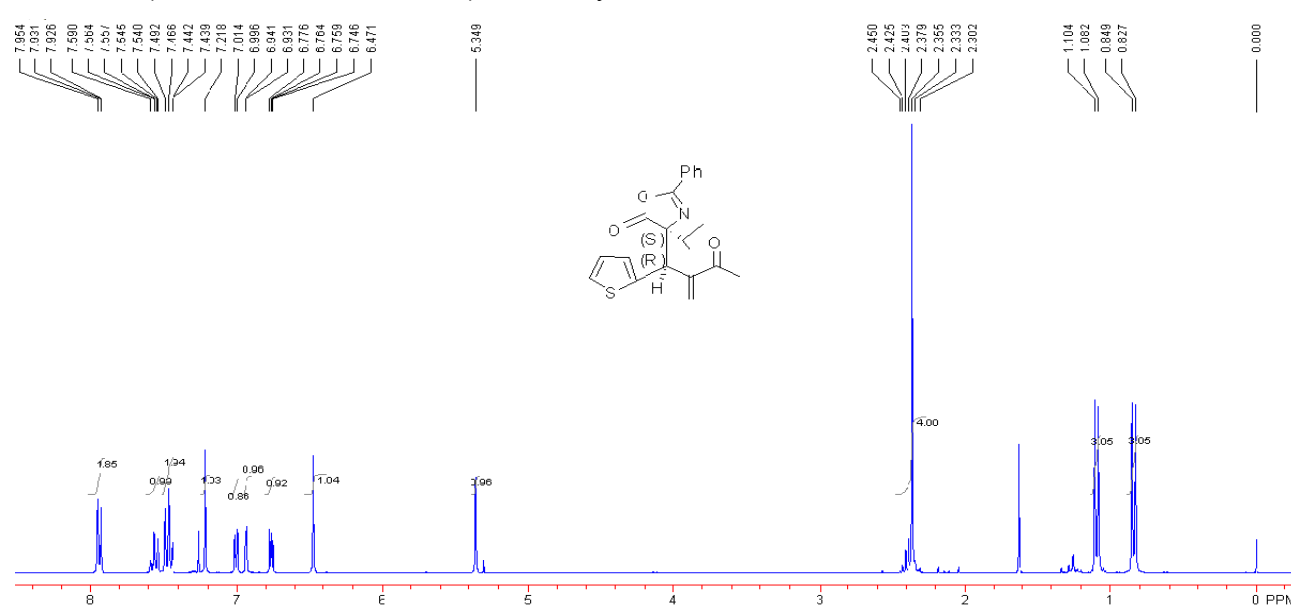

**<sup>13</sup>C NMR (75 MHz, CDCl<sub>3</sub>, TMS) for the *syn*-diastereomer**

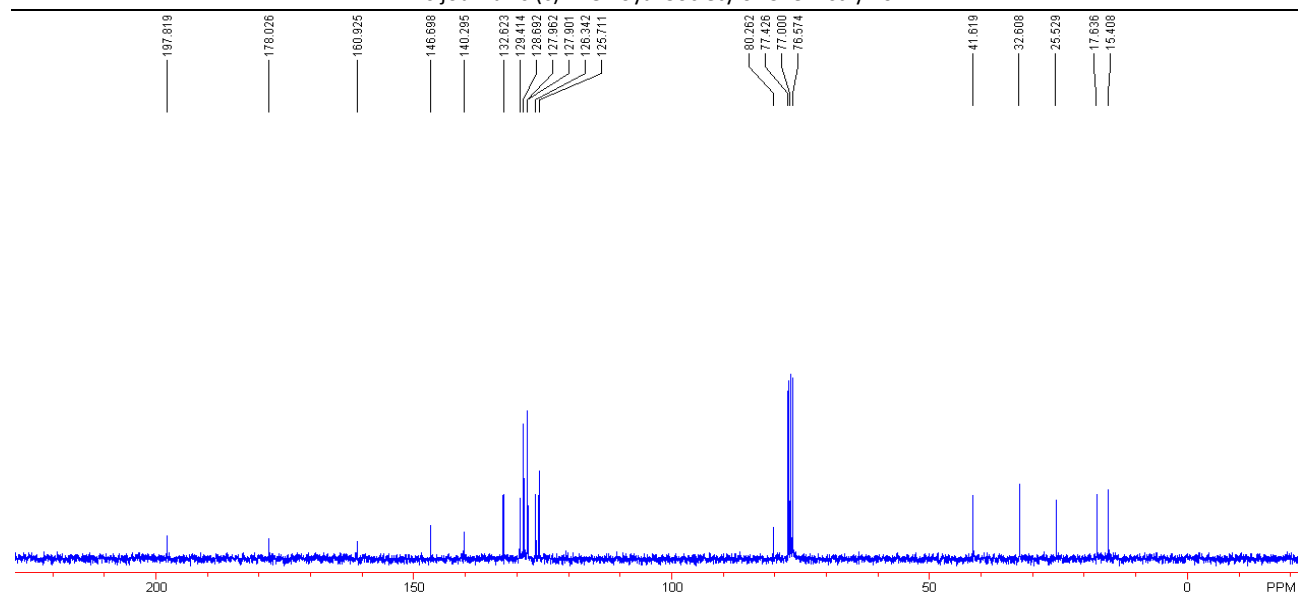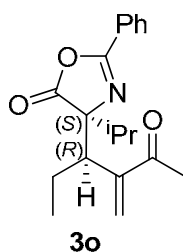

**(S)-4-isopropyl-4-((R)-3-methylene-4-oxopent-2-yl)-2-phenyloxazol-5(4H)-one 3o:**

Following the general procedure, the *syn/anti* ratio (7:1) was determined by  $^1\text{H}$  NMR spectroscopic analysis of the crude product ( $\delta$  major: 0.76 ppm,  $\delta$  minor: 0.68 ppm). The mixture was purified by column chromatography using silica gel to give a mixture of diastereoisomers along with trace amount of impurity (30 mg, 96% overall yield in a diastereomeric ratio = 7:1); a colorless liquid.  $[\alpha]_D^{20} = +16.9$  (c 1.0,  $\text{CHCl}_3$ ). IR ( $\text{CH}_2\text{Cl}_2$ ):  $\nu$  2965, 2916, 1817, 1774, 1681, 1655, 1580, 1451, 1371, 1336, 1321, 1293, 1261, 1163, 1094, 1022, 954, 920, 880, 799, 761  $\text{cm}^{-1}$ ;  $^1\text{H}$  NMR (400 MHz,  $\text{CDCl}_3$ , TMS):  $\delta$  7.98-7.95 (2H, m, Ar-H), 7.59-7.54 (1H, m, Ar-H), 7.50-7.46 (2H, m, Ar-H), 7.36-7.32 (0.5H, (*anti*-**3o**), m, Ar-H), 6.23 (0.14H (*anti*-**3o**), s, =CH<sub>2</sub>), 6.20 (1H, s, =CH<sub>2</sub>), 6.18 (1H, s, =CH<sub>2</sub>), 5.91 (0.14H (*anti*-**3o**), s, =CH<sub>2</sub>), 3.89 (0.14H (*anti*-**3o**), dd,  $J_1 = 11.6$  Hz;  $J_2 = 3.2$  Hz, CH<sub>2</sub>CH), 3.69 (1H, dd,  $J_1 = 11.6$  Hz;  $J_2 = 4.0$  Hz, CH<sub>2</sub>CH), 2.92-2.85 (0.14H (*anti*-**3o**), m), 2.30-2.20 (4.4H, m, CH(CH<sub>3</sub>)<sub>2</sub>, COCH<sub>3</sub>), 1.69-1.51 (2H, m, CH<sub>3</sub>CH<sub>2</sub>), 1.33-1.28 (0.28H (*anti*-**3o**), m, CH<sub>3</sub>CH<sub>2</sub>), 1.23 (0.42H (*anti*-**3o**), d,  $J = 6.8$  Hz, CH(CH<sub>3</sub>)<sub>2</sub>), 1.19 (0.42H (*anti*-**3o**), d,  $J = 6.8$  Hz, CH(CH<sub>3</sub>)<sub>2</sub>), 0.97 (3H, d,  $J = 6.8$  Hz, CH(CH<sub>3</sub>)<sub>2</sub>), 0.89 (3H, d,  $J = 6.8$  Hz, CH(CH<sub>3</sub>)<sub>2</sub>), 0.76 (3H, t,  $J = 7.2$  Hz, CH<sub>3</sub>CH<sub>2</sub>), 0.68 (0.42H (*anti*-**3o**), t,  $J = 7.2$  Hz, CH<sub>3</sub>CH<sub>2</sub>);  $^{13}\text{C}$  NMR ( $\text{CDCl}_3$ , 100 MHz):  $\delta$  (major) 199.3, 179.5, 159.5, 148.0, 132.6, 128.7, 127.8, 126.2, 125.7, 80.2, 41.8, 32.3, 25.7, 22.6, 16.8, 16.6, 11.5; MS (EI)  $m/z$  (%) 313 (1.43) [ $\text{M}^+$ ], 271 (4.10), 242 (8.07), 203 (11.73), 188 (2.29), 174 (3.13), 155 (1.12), 105 (100), 77 (24.27), 57 (11.42), 43 (25.48); HRMS (EI) Calcd for  $\text{C}_{19}\text{H}_{23}\text{NO}_3$  [ $\text{M}^+$ ] requires 313.1678, Found 313.1679; The ee of the *syn*-diastereomer was determined to be 85% [determined by HPLC, Chiralpak IC-H, n-hexane/isopropanol = 99:1, 0.5

mL/min,  $\lambda = 214$  nm, t (major) = 34.31 min, t (minor) = 22.87 min].

**$^1\text{H}$  NMR (400 MHz,  $\text{CDCl}_3$ , TMS) for the crude product**

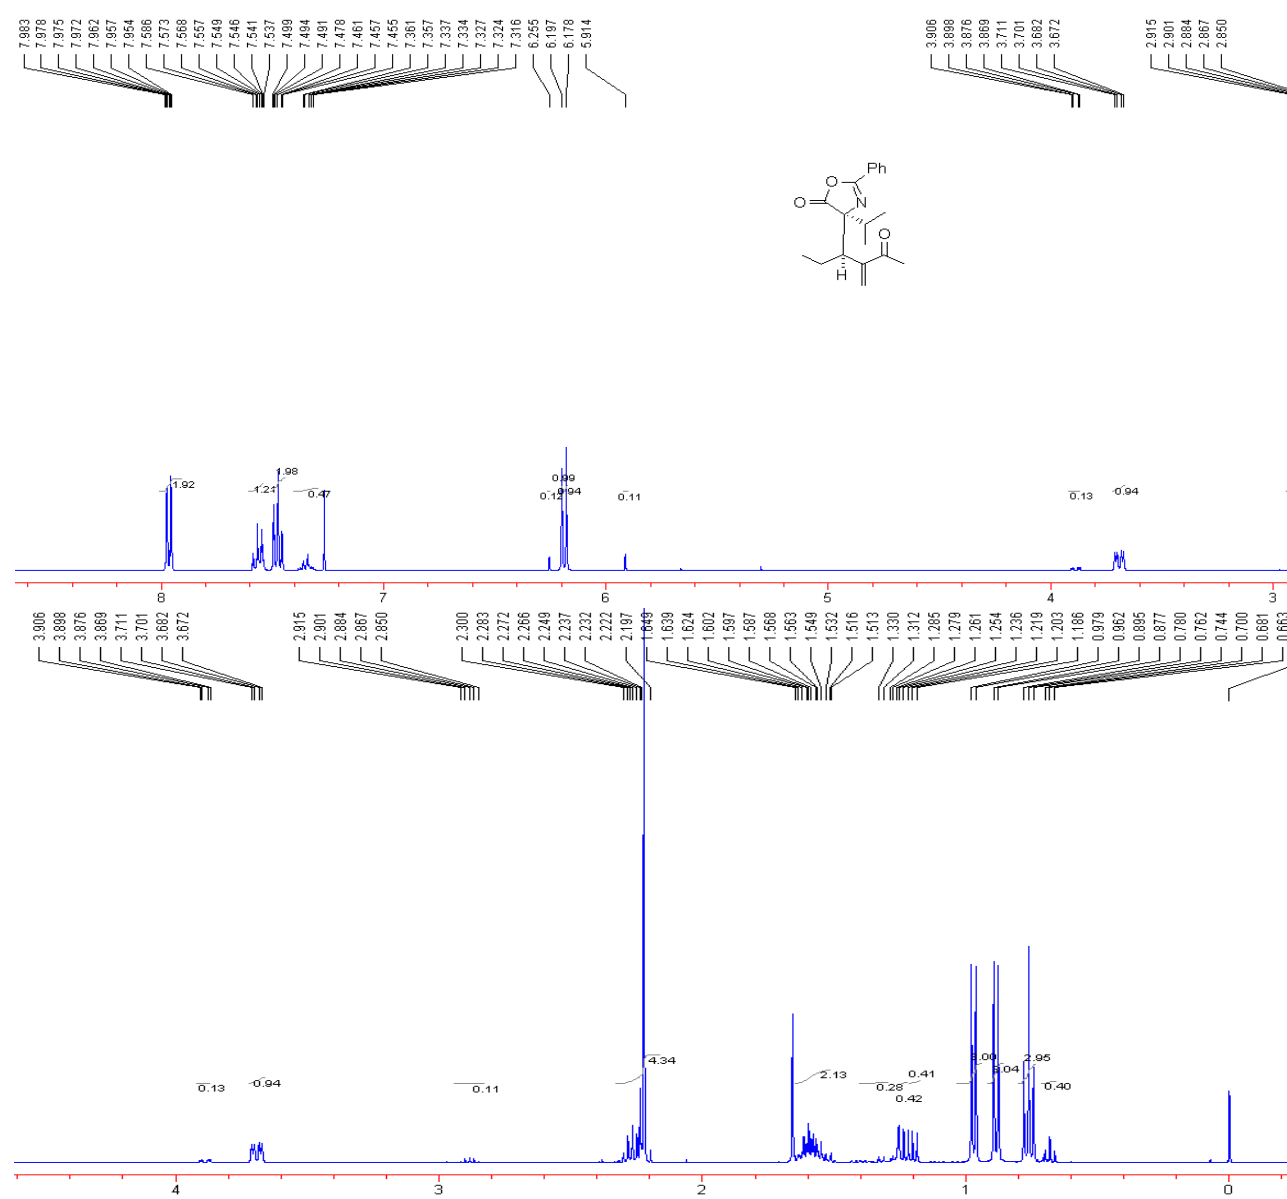

**$^{13}\text{C}$  NMR (100 MHz,  $\text{CDCl}_3$ , TMS) for the crude product (major)**

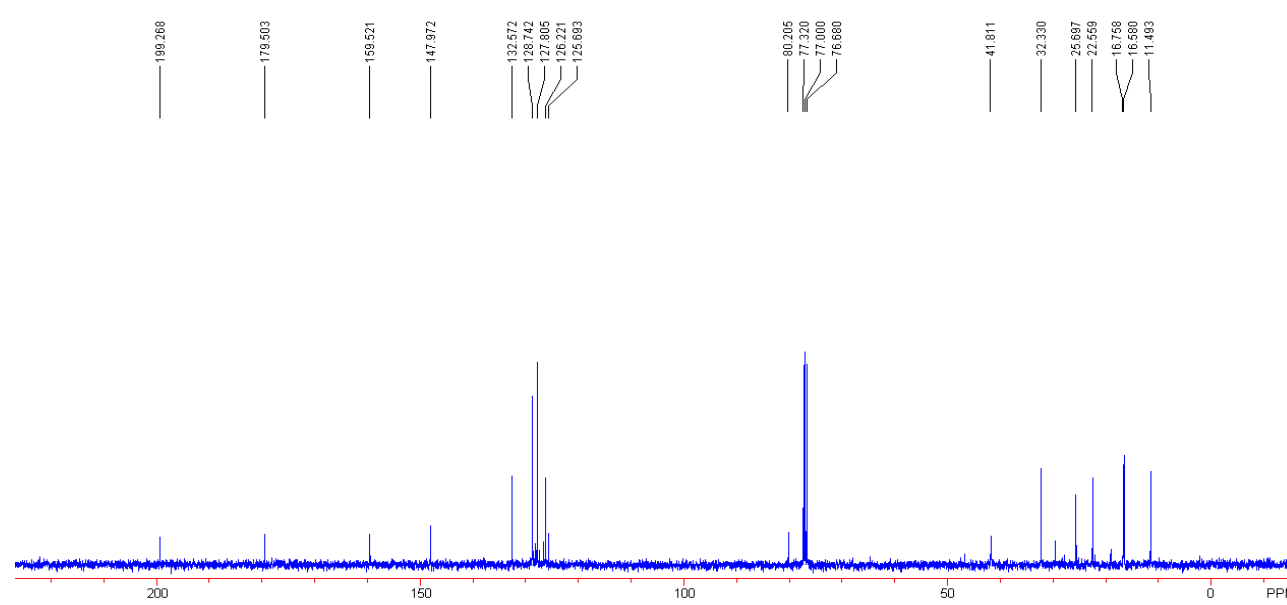

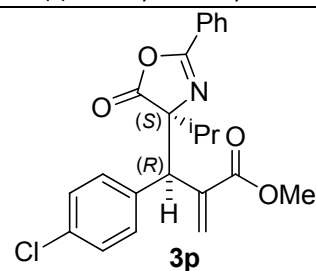

Methyl

2-((R)-(4-chlorophenyl)((S)-4-isopropyl-5-oxo-2-phenyl-4,5-dihydrooxazol-4-yl)methyl)acrylate

**3p**: To a mixture of **1p** (0.11 mmol, 36 mg), **2a** (0.10 mmol, 21 mg) and catalyst **L2** (13 mg, 0.020 mmol) was added 1.0 mL of THF at room temperature under argon. The resulting mixture was heated to 40 °C and monitored by TLC. After the reaction complete, the solution was concentrated under reduced pressure and the residue was further purified by silica gel column chromatography (EtOAc/PE = 1/20) to give the target product **3p** (13 mg, 32% yield), a white solid, m.p. for *syn*-**3p** = 98-100 °C. The *syn/anti* ratio (2:1) was determined by <sup>1</sup>H NMR spectroscopic analysis of the crude product (δ major: 2.79 ppm, δ minor: 2.62 ppm). [α]<sub>D</sub><sup>20</sup> (*syn*-**3p**) -100.3 (c 0.6, CHCl<sub>3</sub>). IR (CH<sub>2</sub>Cl<sub>2</sub>): ν 2967, 1772, 1717, 1649, 1491, 1441, 1408, 1386, 1157, 1122, 1090, 1071, 1013, 1002, 969, 947, 921, 885, 782 cm<sup>-1</sup>; <sup>1</sup>H NMR (400MHz, CDCl<sub>3</sub>, TMS) for *syn*-**3p**: δ 7.52-7.50 (2H, m), 7.33-7.31 (3H, m), 7.21 (4H, s), 6.49 (1H, s), 5.23 (1H, s), 3.65 (3H, s), 2.79 (1H, qu, *J* = 6.8 Hz, -CH(CH<sub>3</sub>)<sub>2</sub>), 1.21 (3H, d, *J* = 6.8 Hz, -CH(CH<sub>3</sub>)<sub>2</sub>), 1.08 (3H, d, *J* = 6.8 Hz, -CH(CH<sub>3</sub>)<sub>2</sub>); <sup>13</sup>C NMR (CDCl<sub>3</sub>, 100 MHz) for *syn*-**3p**: δ 169.3, 166.5, 163.4, 137.4, 136.6, 133.7, 132.0, 130.3, 129.0, 128.4, 128.2, 126.7, 106.8, 53.4, 52.3, 28.0, 18.9, 18.7; MS (EI(*syn*-**3p**)) *m/z* (%) 411 (1.64) [M<sup>+</sup>], 308 (14.13), 266 (5.64), 209 (69.26), 177 (4.46), 149 (38.93), 130 (13.74), 115 (22.47), 105 (100.00), 77 (33.65), 59 (11.86); HRMS (EI) Calcd for C<sub>23</sub>H<sub>22</sub>ClNO<sub>4</sub> [M<sup>+</sup>] requires 411.1237, Found 411.1248; The ee of the *syn*-diastereomer was determined to be 86% [determined by HPLC, Chiralpak AD-H, n-hexane/isopropanol = 95:5, 0.7 mL/min, λ = 230 nm, t (major) = 11.42 min, t (minor) = 10.17 min].

<sup>1</sup>H NMR (400 MHz, CDCl<sub>3</sub>, TMS) for the crude product

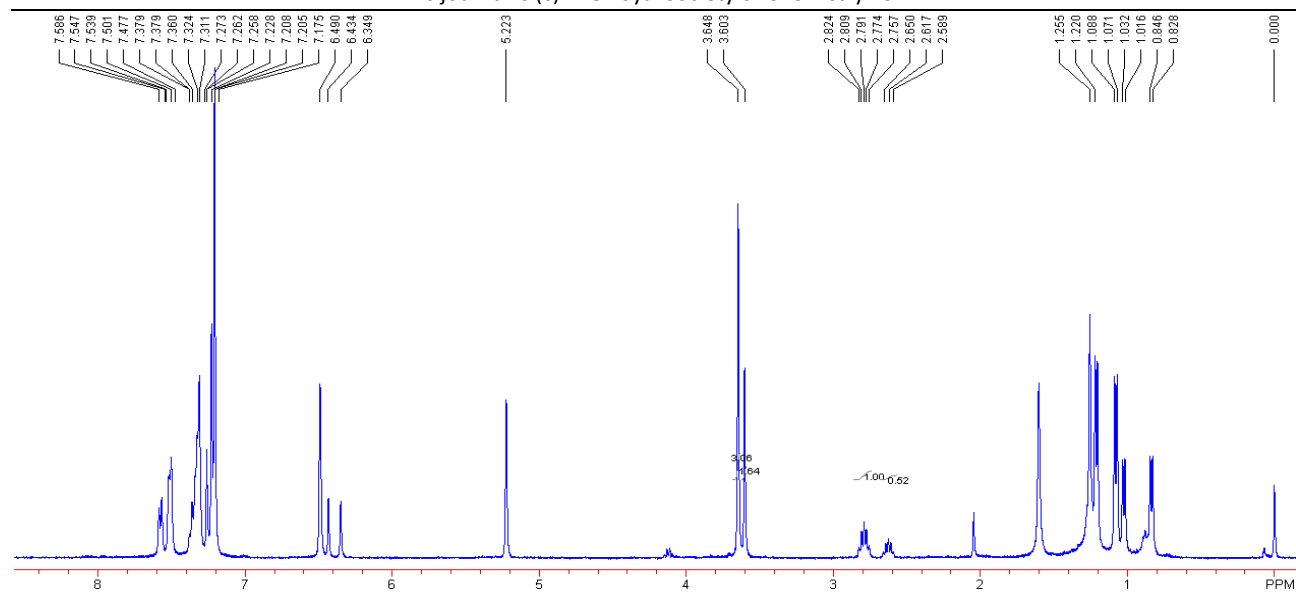**<sup>1</sup>H NMR (400 MHz, CDCl<sub>3</sub>, TMS) for the *syn*-diastereomer**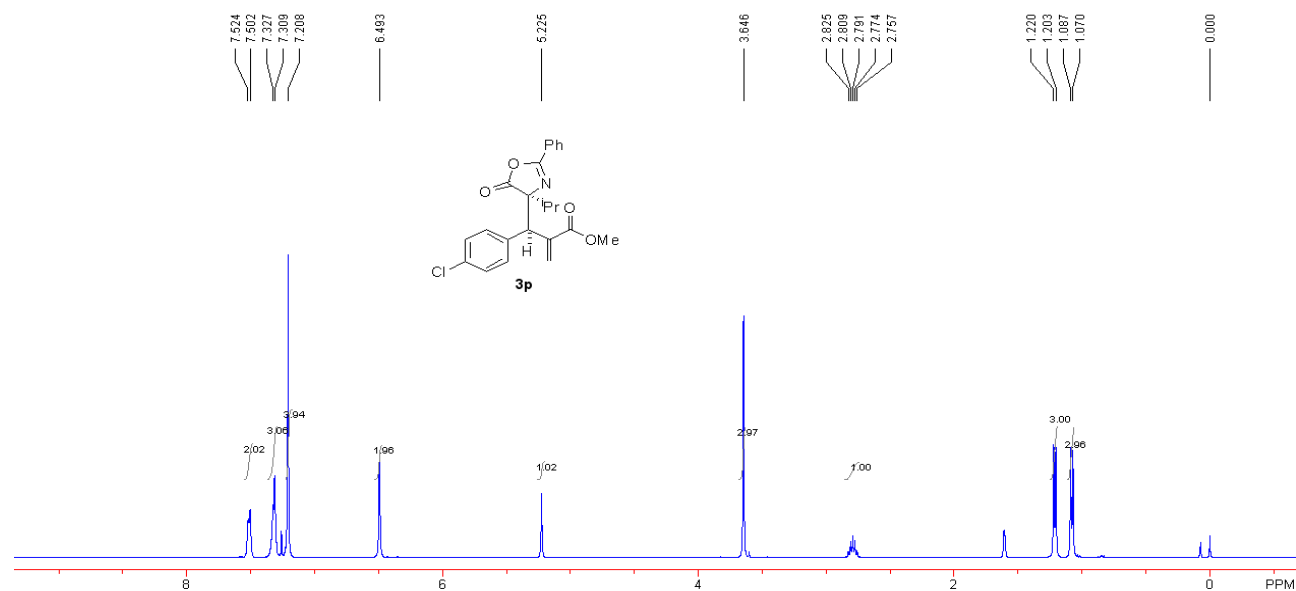**<sup>13</sup>C NMR (100 MHz, CDCl<sub>3</sub>, TMS) for the *syn*-diastereomer**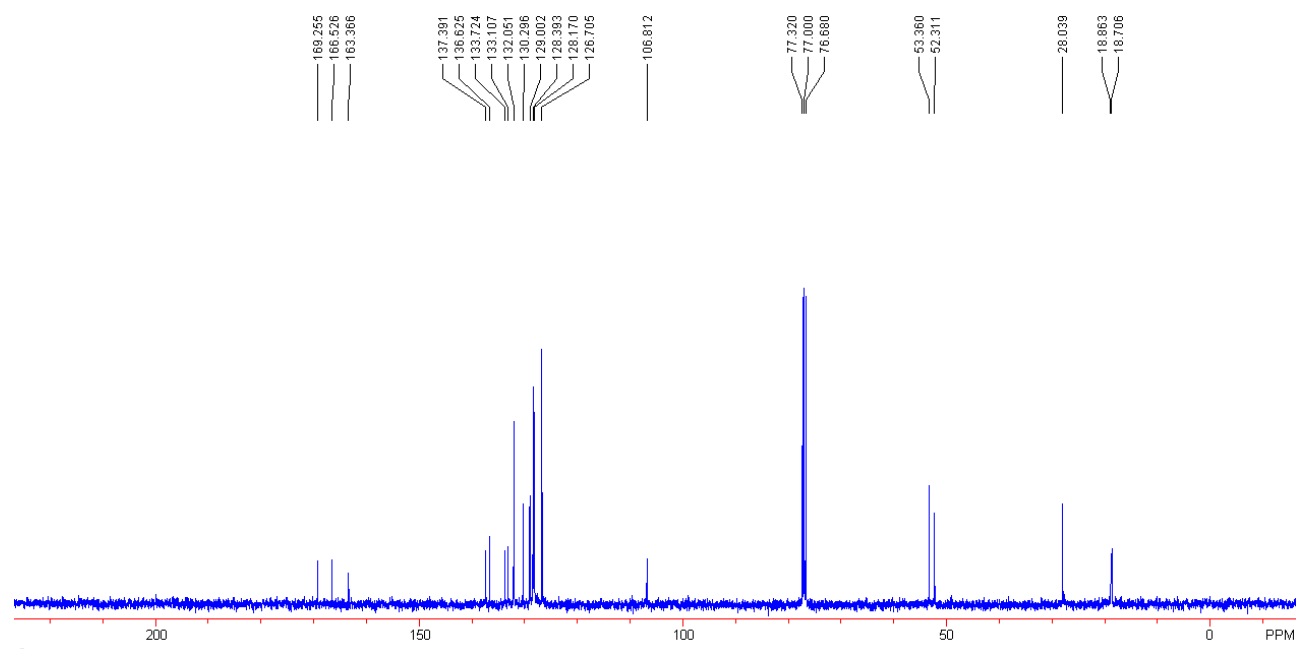

**General procedure for the hydrolysis of addition products **3j** and **3b** to the corresponding amino acid.**

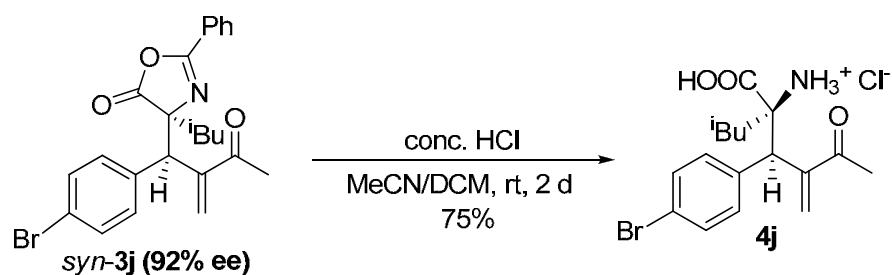

The addition product *syn*-**3j** (30 mg, 60  $\mu\text{mol}$ ) was dissolved in mixed solvent of MeCN/DCM (0.20 mL/0.10 mL), then 0.10 mL conc. HCl was added. The resulting mixture was stirred at room temperature for two days. The solvent was removed under reduced pressure and the residue was purified by column chromatography on SiO<sub>2</sub> gel (DCM/EtOH = 40/1 ~ 10/1 as eluent) to give the corresponding amino acid **4j** as white solid (18 mg, 45  $\mu\text{mol}$ , 75% yield). m.p. 95-97 °C;  $[\alpha]_{\text{D}}^{20} = +75.2$  (c 0.7, CHCl<sub>3</sub>). IR (neat):  $\nu$  2954, 2922, 2851, 1815, 1697, 1487, 1464, 1382, 1328, 1211, 1154, 1106, 1073, 1009, 909, 821 cm<sup>-1</sup>; <sup>1</sup>H NMR (300 MHz, CDCl<sub>3</sub>, TMS):  $\delta$  7.42 (2H, d,  $J = 8.4$  Hz), 6.98 (2H, d,  $J = 8.4$  Hz), 5.54 (1H, s), 5.01 (1H, s), 3.81 (1H, s), 2.31-2.04 (4H, m), 1.80-1.75 (1H, m), 1.42-1.29 (1H, m), 0.92 (3H, d,  $J = 6.6$  Hz), 0.86 (3H, d,  $J = 6.6$  Hz); <sup>13</sup>C NMR (CDCl<sub>3</sub>, 75 MHz):  $\delta$  172.5, 170.8, 152.8, 139.9, 131.1, 130.8, 119.9, 111.8, 84.6, 58.1, 48.3, 25.0, 24.6, 23.5, 15.6; MS (ESI)  $m/e$  350 (M-H<sub>2</sub>O-HCl)<sup>+</sup>; HRMS (ESI) for C<sub>17</sub>H<sub>21</sub>NO<sub>2</sub>Br (M-H<sub>2</sub>O-HCl)<sup>+</sup>: 350.0750, Found: 350.0757.

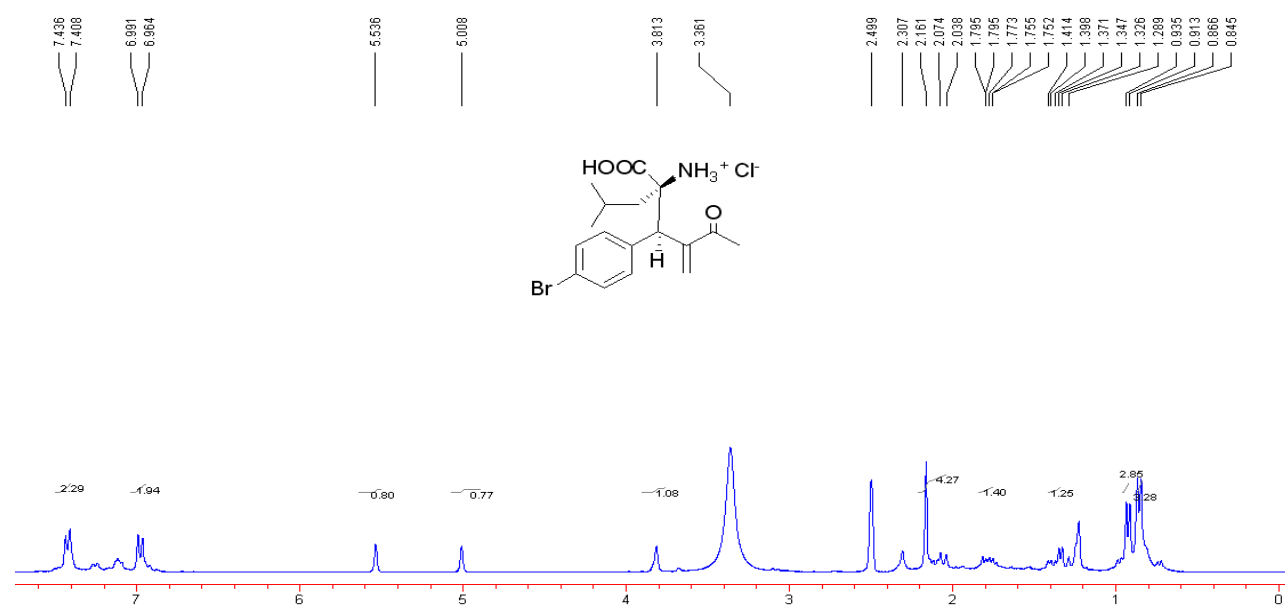

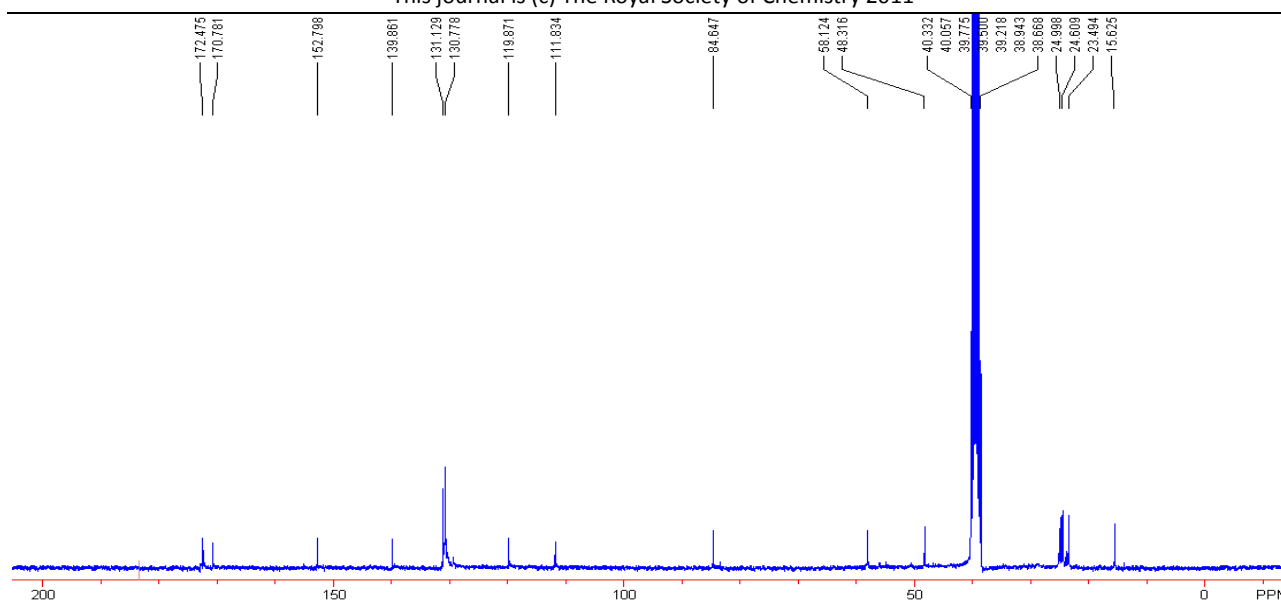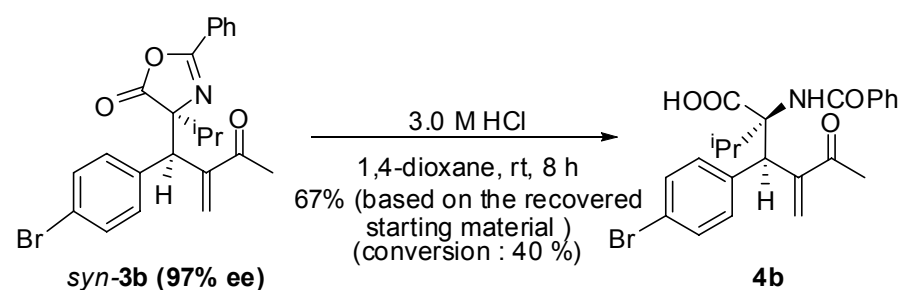

The addition product *syn-3b* (65.0 mg, 148  $\mu\text{mol}$ ) was dissolved in 500  $\mu\text{L}$  1,4-dioxane, then 80.0  $\mu\text{L}$ , 3.0 M HCl aqueous solution was added. The resulting mixture was stirred at room temperature for 8 hours. The solvent was removed under reduced pressure and the residue was purified by column chromatography on  $\text{SiO}_2$  gel (DCM/EtOH = 40/1 ~ 20/1 as eluent) to give the corresponding amino acid derivative **4b** as white solid (18.0 mg, 39  $\mu\text{mol}$ , 67% yield based on the recovered **3b**, 39.0 mg starting material was recovered). m.p. 139-141  $^\circ\text{C}$ ;  $[\alpha]_{\text{D}}^{20} = +28.3$  (c 0.9,  $\text{CHCl}_3$ ). IR ( $\text{CH}_2\text{Cl}_2$ ):  $\nu$  2927, 2855, 1780, 1714, 1674, 1520, 1487, 1394, 1365, 1264, 1218, 1074, 1011, 895, 801  $\text{cm}^{-1}$ ;  $^1\text{H}$  NMR (300 MHz,  $\text{CDCl}_3$ , TMS):  $\delta$  8.51 (1H, bs), 7.87 (2H, d,  $J = 7.2$  Hz), 7.57 (1H, d,  $J = 6.8$  Hz), 7.48 (2H, d,  $J = 6.8$  Hz), 7.36 (2H, d,  $J = 8.7$  Hz), 7.22 (2H, d,  $J = 8.7$  Hz), 6.43 (1H, s), 5.12 (1H, s), 4.78 (1H, bs), 2.81 (1H, qu,  $J = 7.2$  Hz), 2.39 (3H, s), 1.08 (3H, d,  $J = 7.2$  Hz), 1.05 (3H, d,  $J = 7.2$  Hz);  $^{13}\text{C}$  NMR ( $\text{CDCl}_3$ , 100 MHz):  $\delta$  202.1, 169.6, 162.5, 147.6, 137.9, 133.8, 132.9, 132.2, 131.4, 130.8, 128.8, 127.3, 121.0, 72.6, 51.2, 33.4, 26.8, 18.7, 18.0; MS (ESI)  $m/e$  458 ( $\text{M}^+\text{H}$ ); HRMS (ESI) for  $\text{C}_{23}\text{H}_{25}\text{NO}_4\text{Br}$  ( $\text{M}^+\text{H}$ ): 458.0952, Found: 458.0961.



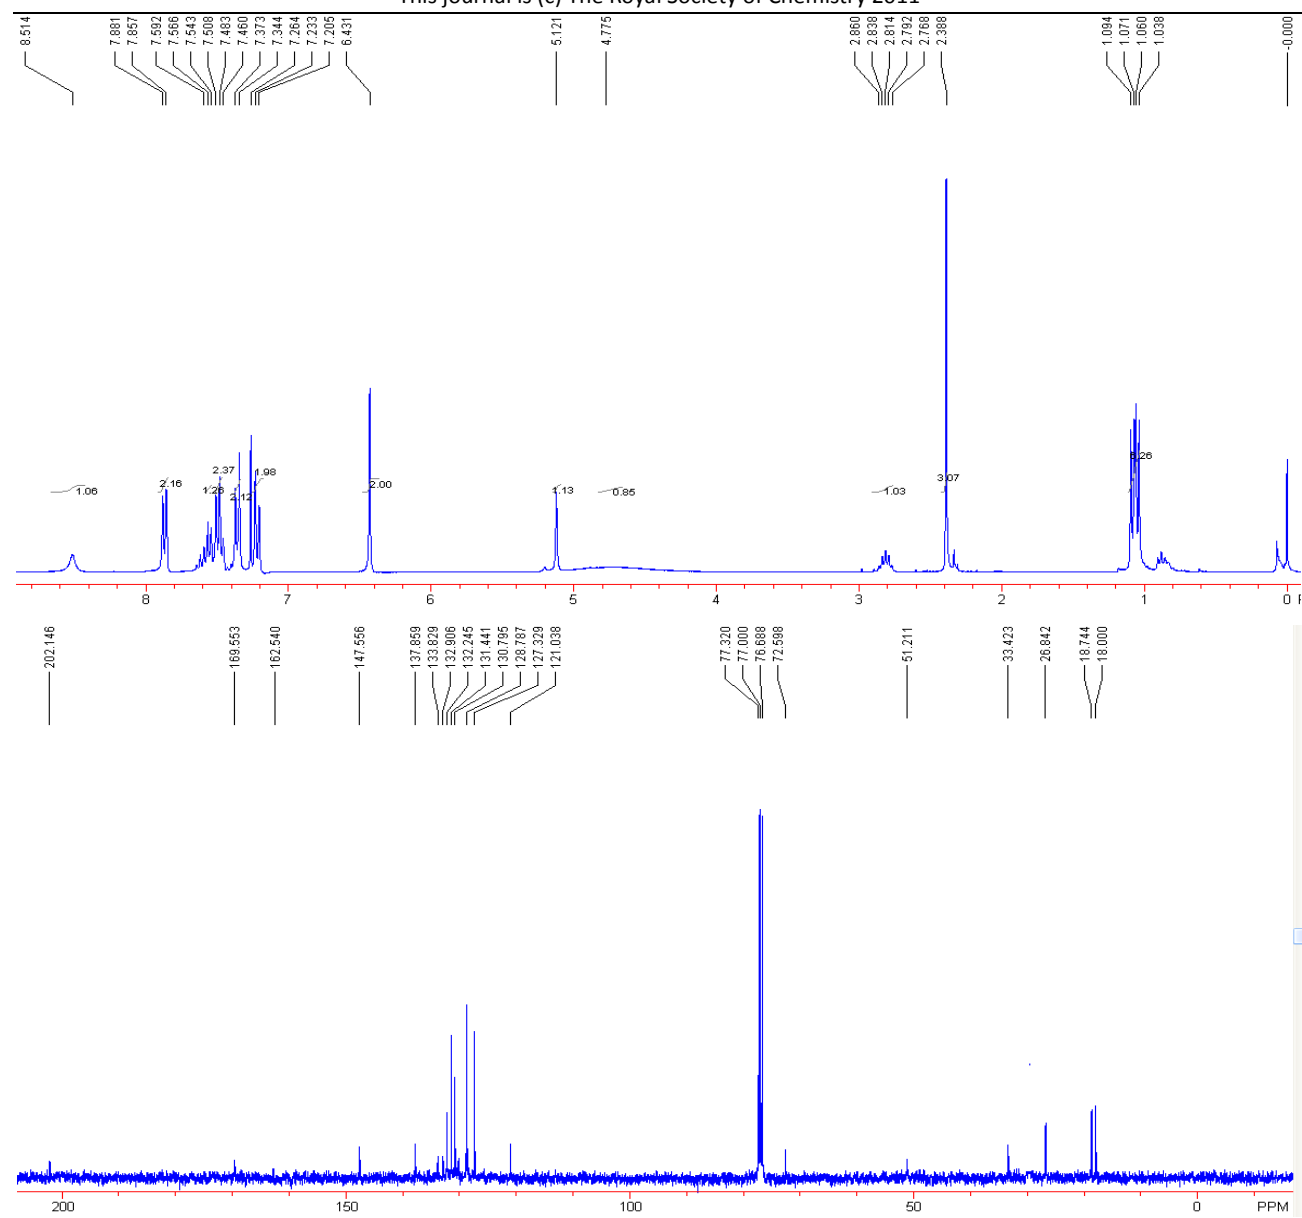

HPLC spectra:

HPLC REPORT

Sample Name: yyl-9-38  
Column: AD-H  
Velocity (mL/min): 0.7

Date: #####  
Mobile Phase: hex/ipr = 90/10  
Detection Wavelength (nm): 230

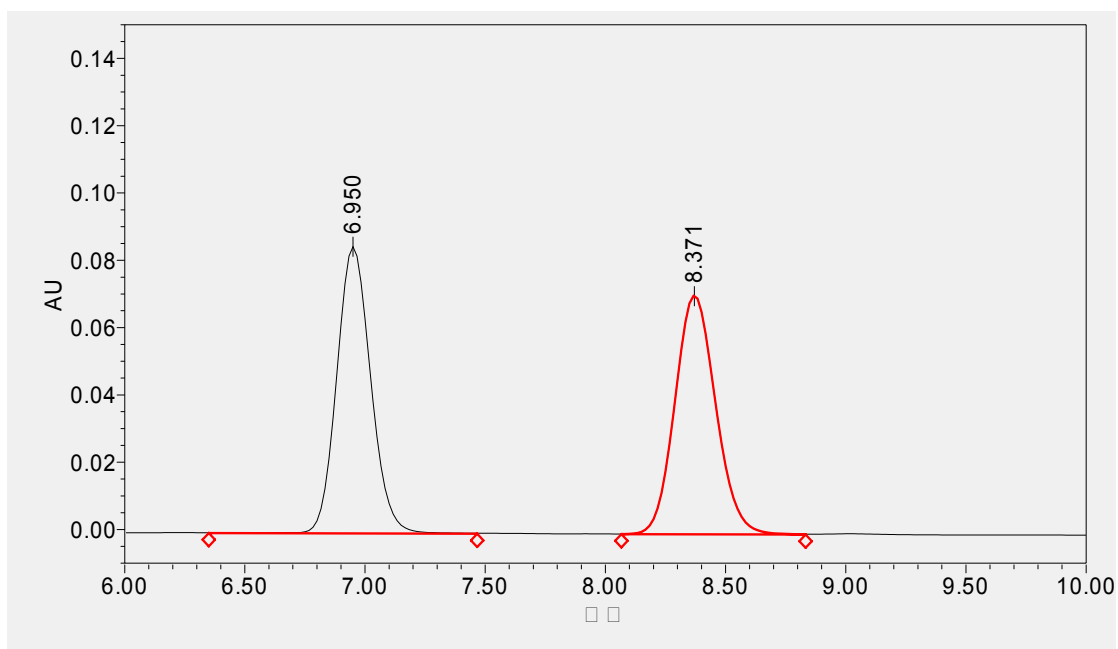

| NO | R. Time | Peak Area | Percent | Peak Height |
|----|---------|-----------|---------|-------------|
| 1  | 6.950   | 840267    | 50.11   | 85140       |
| 2  | 8.371   | 836746    | 49.89   | 70979       |

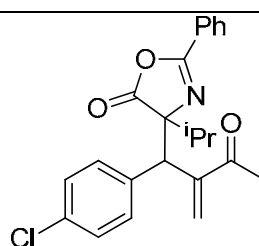

Chiral HPLC report: racemate (*syn*-**3a**)

HPLC REPORT

Sample Name: yyl-9-87  
Column: AD-H  
Velocity (mL/min): 0.7

Date: #####  
Mobile Phase: hex/ipr = 90/10  
Detection Wavelength (nm): 230

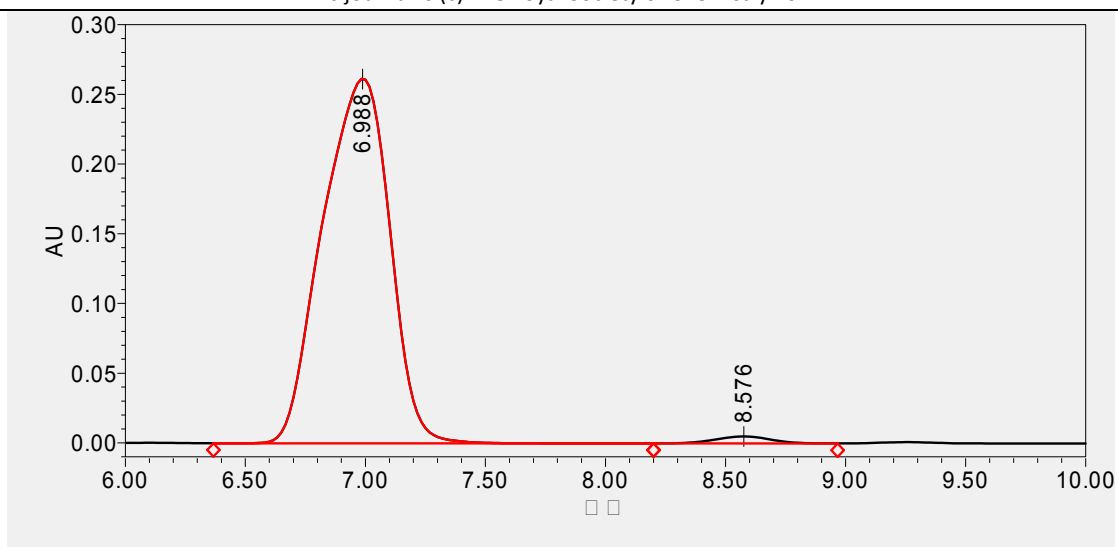

| NO | R. Time | Peak Area | Percent | Peak Height |
|----|---------|-----------|---------|-------------|
| 1  | 6.988   | 5098447   | 98.41   | 261670      |
| 2  | 8.576   | 82534     | 1.59    | 5082        |

Chiral HPLC report: Enantiomeric excess was determined by HPLC with a Chiralpak AD column;  $\lambda = 230$  nm; eluent: Hexane/Isopropanol = 90/10; Flow rate: 0.7 mL/min;  $t_{\text{minor}} = 8.57$  min,  $t_{\text{major}} = 6.98$  min; ee% = 97.

### HPLC REPORT

Sample Name: yyl-9-64-2  
Column: AD-H  
Velocity (mL/min): 0.7

Date: ####  
Mobile Phase: hex/ipr = 90/10  
Detection Wavelength (nm): 230

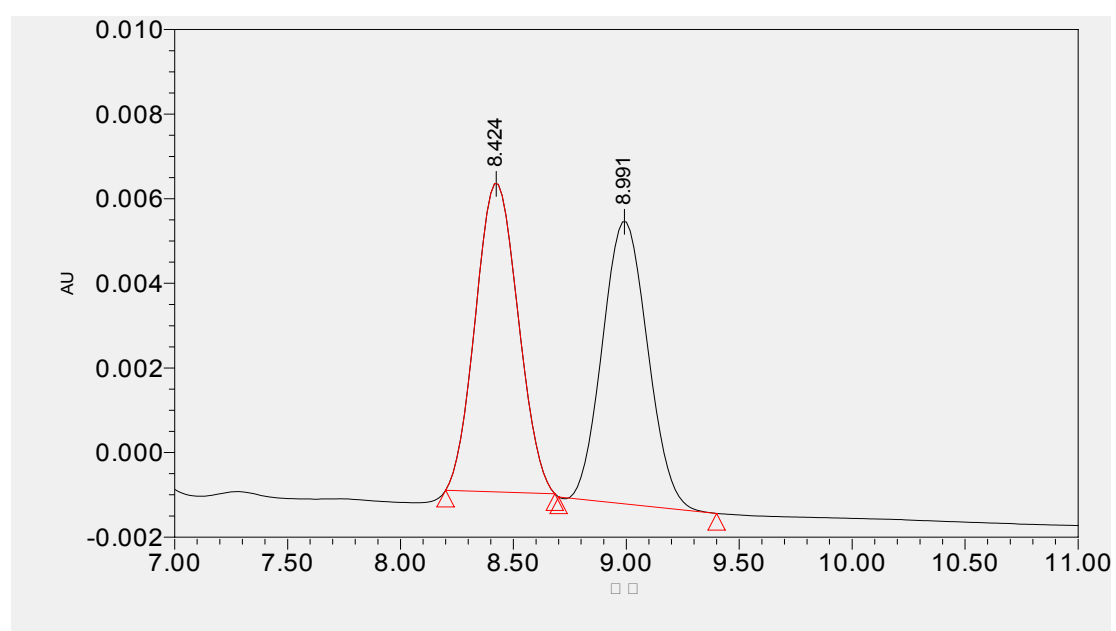

| NO | R. Time | Peak Area | Percent | Peak Height |
|----|---------|-----------|---------|-------------|
| 1  | 8.424   | 98792     | 51.47   | 7409        |
| 2  | 8.991   | 93152     | 48.53   | 6696        |

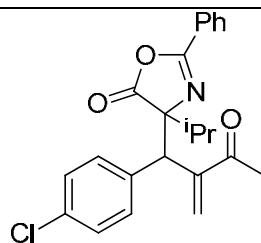

Chiral HPLC report: racemate (*anti*-**3a**)

### HPLC REPORT

Sample Name: yyl-9-96-2

Date: ####

Column: AD-H

Mobile Phase: hex/ipr = 90/10

Velocity (mL/min): 0.7

Detection Wavelength (nm): 230

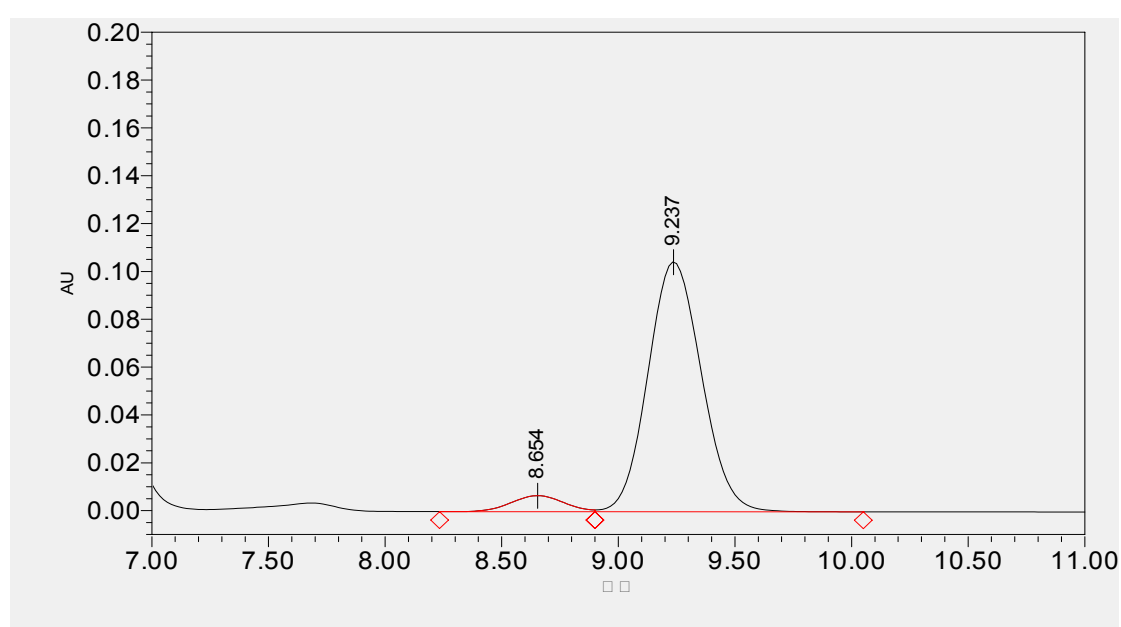

| NO | R. Time | Peak Area | Percent | Peak Height |
|----|---------|-----------|---------|-------------|
| 1  | 8.854   | 105468    | 5.95    | 6695        |
| 2  | 9.237   | 1668272   | 94.05   | 104513      |

Chiral HPLC report: Enantiomeric excess was determined by HPLC with a Chiralpak AD column;  $\lambda = 230$  nm; eluent: Hexane/Isopropanol = 90/10; Flow rate: 0.7 mL/min;  $t_{\text{minor}} = 8.85$  min,  $t_{\text{major}} = 9.23$  min; ee% = 88 (using **L4** as a chiral ligand).



### HPLC REPORT

Sample Name: yyl-9-89-2  
Column: AD-H  
Velocity (mL/min): 0.7

Date: #####  
Mobile Phase: hex/ipr = 90/10  
Detection Wavelength (nm): 230

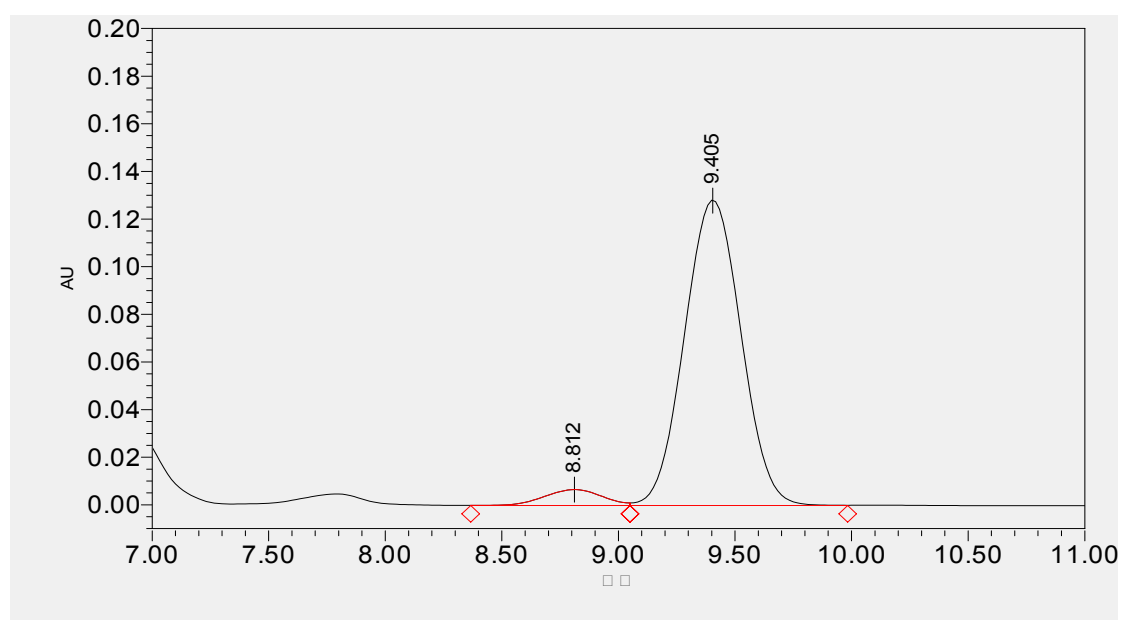

| NO | R. Time | Peak Area | Percent | Peak Height |
|----|---------|-----------|---------|-------------|
| 1  | 8.812   | 114653    | 5.04    | 6681        |
| 2  | 9.405   | 2161814   | 94.96   | 12.8299     |

Chiral HPLC report: Enantiomeric excess was determined by HPLC with a Chiralpak AD column;  $\lambda = 230$  nm; eluent: Hexane/Isopropanol = 90/10; Flow rate: 0.7 mL/min;  $t_{\text{minor}} = 8.81$  min,  $t_{\text{major}} = 9.40$  min; ee% = 90 (using **L2** as a chiral ligand in DMF).

### HPLC REPORT

Sample Name: yyl-10-14  
Column: AD-H  
Velocity (mL/min): 0.7

Date: #####  
Mobile Phase: hex/ipr = 90/10  
Detection Wavelength (nm): 230

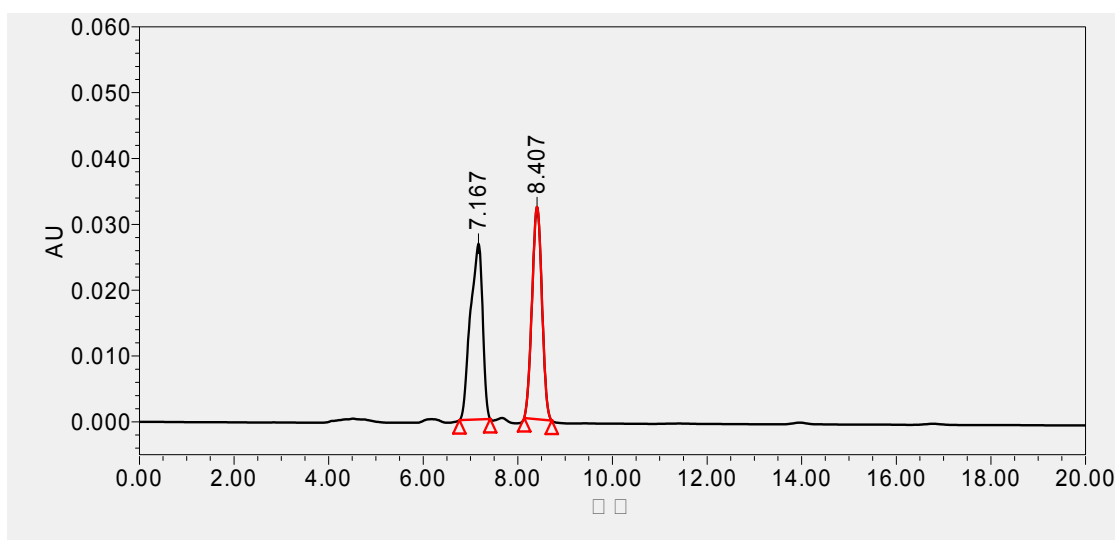

| NO | R. Time | Peak Area | Percent | Peak Height |
|----|---------|-----------|---------|-------------|
| 1  | 7.167   | 476710    | 50.38   | 26700       |
| 2  | 8.407   | 469426    | 49.62   | 32299       |

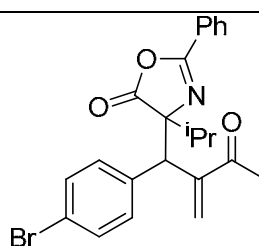

Chiral HPLC report: racemate (*syn-3b*)

### HPLC REPORT

Sample Name: yyl-10-13  
Column: AD-H  
Velocity (mL/min): 0.7

Date: #####  
Mobile Phase: hex/ipr = 90/10  
Detection Wavelength (nm): 230

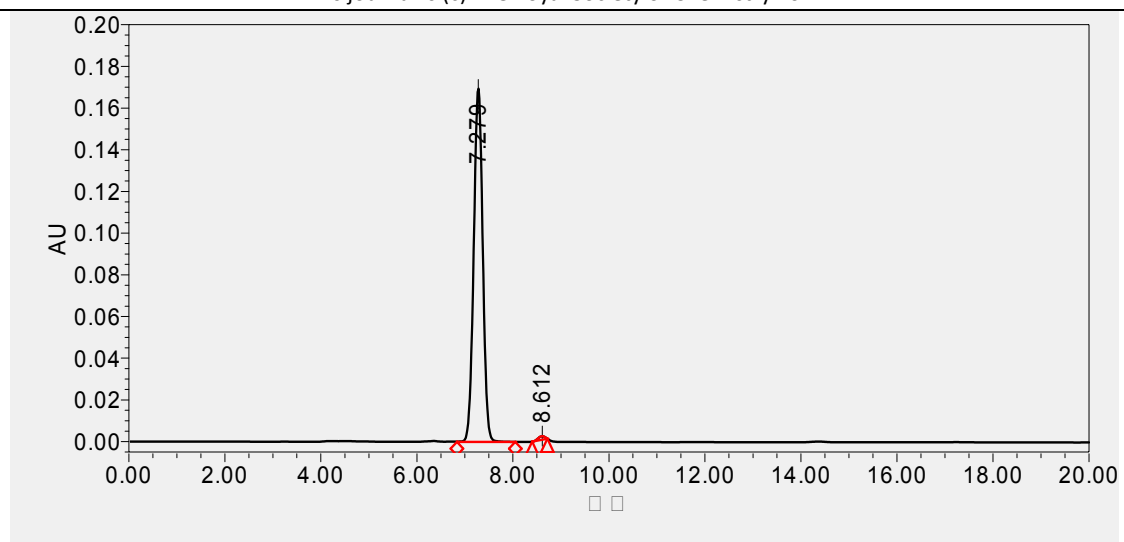

| NO | R. Time | Peak Area | Percent | Peak Height |
|----|---------|-----------|---------|-------------|
| 1  | 7.279   | 2212527   | 98.27   | 169606      |
| 2  | 8.612   | 38987     | 1.73    | 2767        |

Chiral HPLC report: Enantiomeric excess was determined by HPLC with a Chiralpak AD column;  $\lambda = 230$  nm; eluent: Hexane/Isopropanol = 90/10; Flow rate: 0.7 mL/min;  $t_{\text{minor}} = 8.61$  min,  $t_{\text{major}} = 7.28$  min; ee% = 97.



### HPLC REPORT

Sample Name: yyl-10-16  
Column: AD-H  
Velocity (mL/min): 0.7

Date: #####  
Mobile Phase: hex/ipr = 90/10  
Detection Wavelength (nm): 230

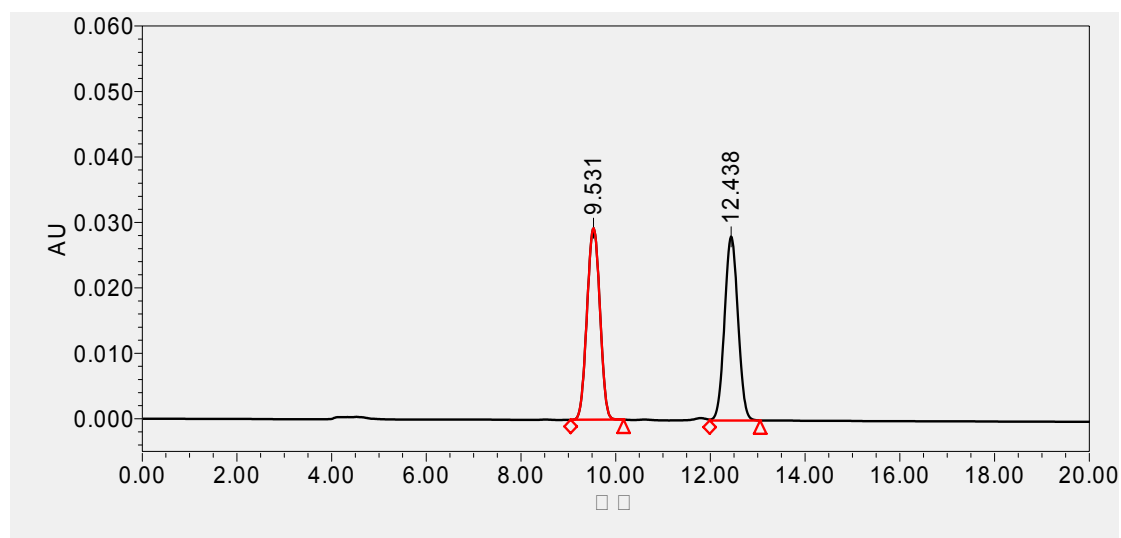

| NO | R. Time | Peak Area | Percent | Peak Height |
|----|---------|-----------|---------|-------------|
| 1  | 9.531   | 557139    | 50.06   | 29268       |
| 2  | 12.438  | 555823    | 49.94   | 28097       |

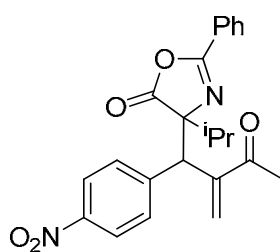

Chiral HPLC report: racemate (*syn-3c*)

### HPLC REPORT

Sample Name: yyl-10-15  
Column: AD-H  
Velocity (mL/min): 0.7

Date: #####  
Mobile Phase: hex/ipr = 90/10  
Detection Wavelength (nm): 230

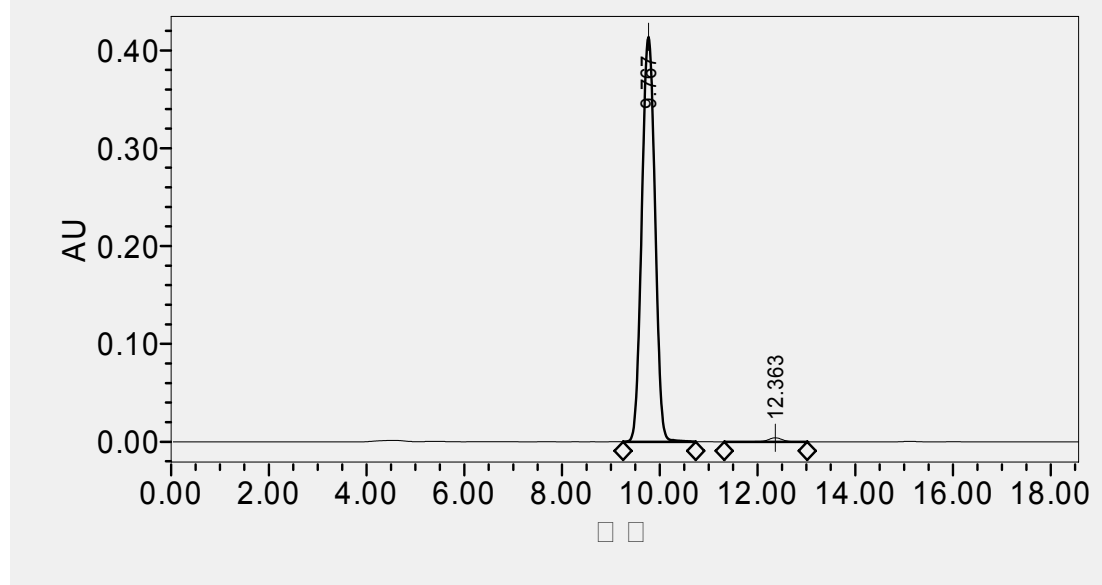

| NO | R. Time | Peak Area | Percent | Peak Height |
|----|---------|-----------|---------|-------------|
| 1  | 9.767   | 7780443   | 98.91   | 413858      |
| 2  | 12.363  | 85683     | 1.09    | 4141        |

Chiral HPLC report: Enantiomeric excess was determined by HPLC with a Chiralpak AD column;  $\lambda = 230$  nm; eluent: Hexane/Isopropanol = 90/10; Flow rate: 0.7 mL/min;  $t_{\text{minor}} = 12.36$  min,  $t_{\text{major}} = 9.77$  min; ee% = 98.

2010-07-17, 20:23:06  
D:\HPLC\杨景梁\yy1-10-99-2-AD-230nm-0.5-90-10.org  
实验者:  
报告时间: 2010-07-20, 19:27:36  
积分方法: 面积归一法

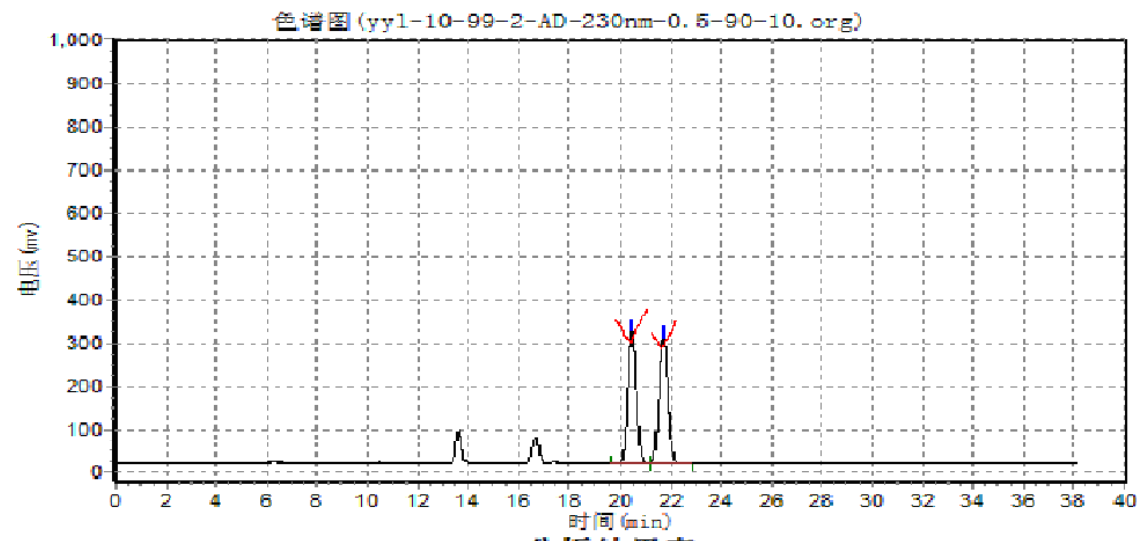

分析结果表

| 号 | 峰名 | 保留时间   | 峰高         | 峰面积          | 含量     |
|---|----|--------|------------|--------------|--------|
| 1 |    | 20.440 | 305499.000 | 7152571.500  | 49.81  |
| 2 |    | 21.687 | 289557.531 | 7204995.500  | 50.18  |
| 计 |    |        | 595056.531 | 14357567.000 | 100.00 |

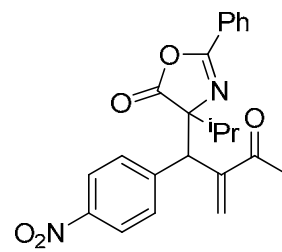

Chiral HPLC report: racemate (*anti*-**3c**)

实验时间: 2010-07-17, 20:54:46  
谱图文件: D:\HPLC\杨袁梁\yy1-10-100-2-AD-230nm-0.5-90-10.org  
实验者:  
报告时间: 2010-07-20, 19:30:38  
积分方法: 面积归一法

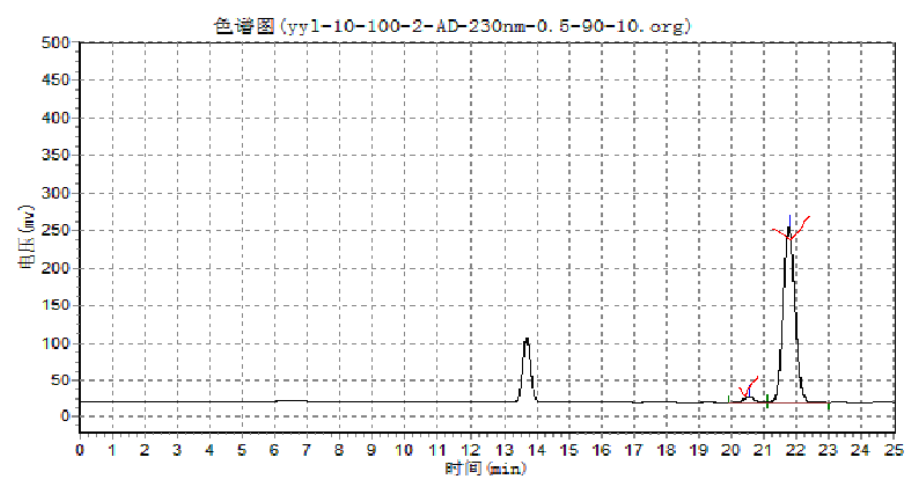

分析结果表

| 峰号 | 峰名 | 保留时间   | 峰高         | 峰面积         | 含量       |
|----|----|--------|------------|-------------|----------|
| 1  |    | 20.542 | 7050.819   | 170989.484  | 2.7903   |
| 2  |    | 21.785 | 233625.969 | 5957092.000 | 97.2097  |
| 总计 |    |        | 240676.788 | 6128081.484 | 100.0000 |

Chiral HPLC report: Enantiomeric excess was determined by HPLC with a Chiralpak AD column;  $\lambda = 230$  nm; eluent: Hexane/Isopropanol = 90/10; Flow rate: 0.5 mL/min;  $t_{\text{minor}} = 20.54$  min,  $t_{\text{major}} = 21.78$  min; ee% = 94.

### HPLC REPORT

Sample Name: yyl-10-17  
Column: AD-H  
Velocity (mL/min): 0.7

Date: #####  
Mobile Phase: hex/ipr = 90/10  
Detection Wavelength (nm): 230

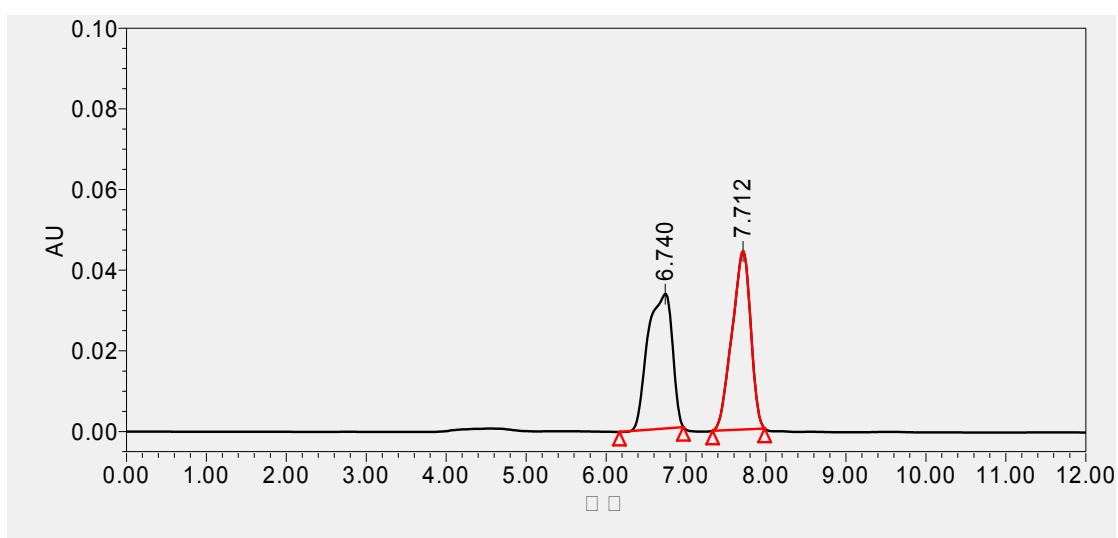

| NO | R. Time | Peak Area | Percent | Peak Height |
|----|---------|-----------|---------|-------------|
| 1  | 6.740   | 711099    | 49.78   | 33471       |
| 2  | 7.712   | 717438    | 50.22   | 44287       |

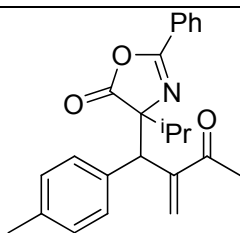

Chiral HPLC report: racemate (*syn-3d*)

### HPLC REPORT

Sample Name: yyl-10-19  
Column: AD-H  
Velocity (mL/min): 0.7

Date: #####  
Mobile Phase: hex/ipr = 90/10  
Detection Wavelength (nm): 230

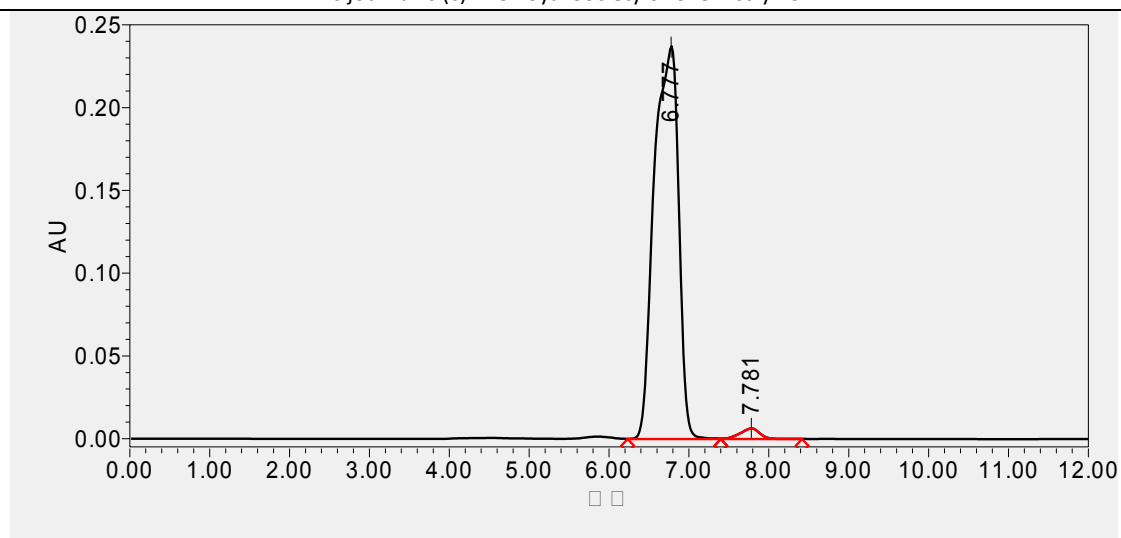

| NO | R. Time | Peak Area | Percent | Peak Height |
|----|---------|-----------|---------|-------------|
| 1  | 6.777   | 5040258   | 97.86   | 237452      |
| 2  | 7.781   | 110022    | 2.14    | 6420        |

Chiral HPLC report: Enantiomeric excess was determined by HPLC with a Chiralpak AD column;  $\lambda = 230$  nm; eluent: Hexane/Isopropanol = 90/10; Flow rate: 0.7 mL/min;  $t_{\text{minor}} = 7.78$  min,  $t_{\text{major}} = 6.78$  min; ee% = 96.

### HPLC REPORT

Sample Name: yyl-10-20  
Column: AD-H  
Velocity (mL/min): 0.7

Date: #####  
Mobile Phase: hex/ipr = 90/10  
Detection Wavelength (nm): 230

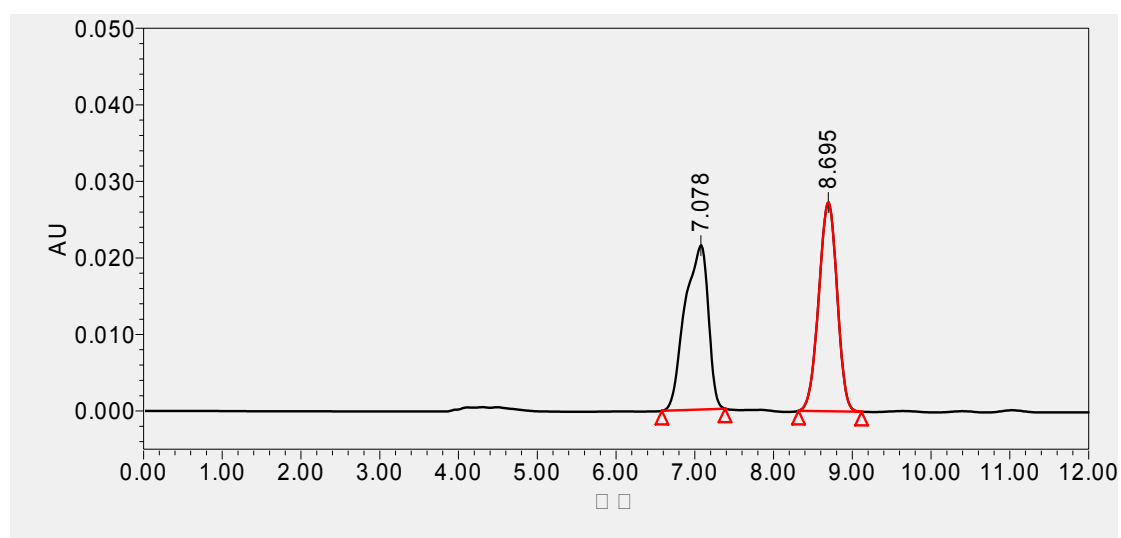

| NO | R. Time | Peak Area | Percent | Peak Height |
|----|---------|-----------|---------|-------------|
| 1  | 7.078   | 442027    | 49.99   | 21469       |
| 2  | 8.695   | 442129    | 50.01   | 27315       |

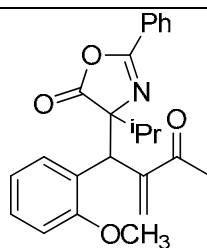

Chiral HPLC report: racemate (*syn-3e*)

### HPLC REPORT

Sample Name: yyl-10-21  
Column: AD-H  
Velocity (mL/min): 0.7

Date: #####  
Mobile Phase: hex/ipr = 90/10  
Detection Wavelength (nm): 230

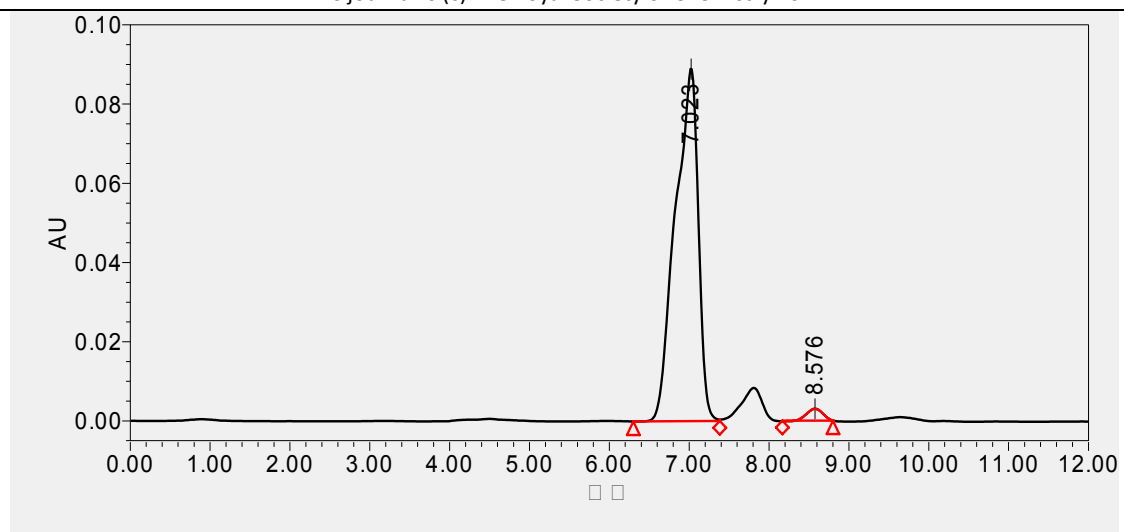

| NO | R. Time | Peak Area | Percent | Peak Height |
|----|---------|-----------|---------|-------------|
| 1  | 7.023   | 1776713   | 97.63   | 89037       |
| 2  | 8.576   | 43154     | 2.37    | 2991        |

Chiral HPLC report: Enantiomeric excess was determined by HPLC with a Chiralpak AD column;  $\lambda = 230$  nm; eluent: Hexane/Isopropanol = 90/10; Flow rate: 0.7 mL/min;  $t_{\text{minor}} = 8.57$  min,  $t_{\text{major}} = 7.02$  min; ee% = 95.



实验时间: 2010-07-18, 17:32:44  
实验文件: D:\HPLC\杨景梁\yy1-11-1-2-new-IC-230nm-0.3-95-5.org  
实验者:  
报告时间: 2010-07-20, 19:35:12  
积分方法: 面积归一法

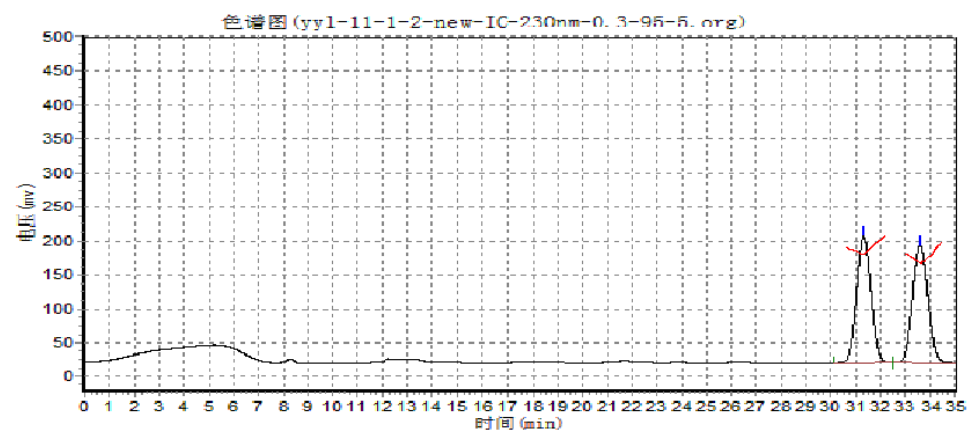

分析结果表

| 峰号 | 峰名 | 保留时间   | 峰高         | 峰面积          | 含量       |
|----|----|--------|------------|--------------|----------|
| 1  |    | 31.317 | 185209.281 | 7503866.000  | 50.0961  |
| 2  |    | 33.603 | 171393.563 | 7475071.000  | 49.9039  |
| 总计 |    |        | 356602.844 | 14978936.000 | 100.0000 |

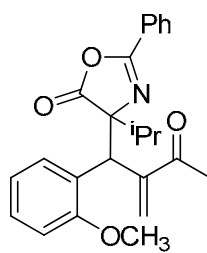

Chiral HPLC report: racemate (*anti*-**3e**)

时间: 2010-07-18, 16:38:01  
文件: D:\HPLC\杨袁梁\yy1-11-2-2-IC-230nm-0.3-95-5. org  
实验者:  
报告时间: 2010-07-20, 19:40:09  
积分方法: 面积归一法

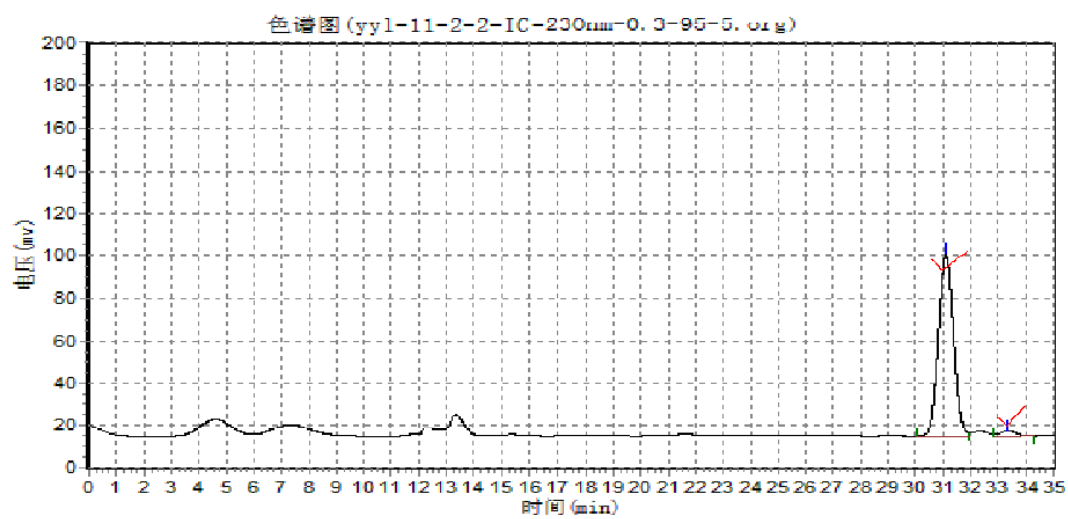

分析结果表

| 峰号 | 峰名 | 保留时间   | 峰高        | 峰面积         | 含量       |
|----|----|--------|-----------|-------------|----------|
| 1  |    | 31.097 | 85199.984 | 3256742.000 | 96.8823  |
| 2  |    | 33.337 | 2548.502  | 104802.445  | 3.1177   |
| 总计 |    |        | 87748.486 | 3361544.445 | 100.0000 |

Chiral HPLC report: Enantiomeric excess was determined by HPLC with a Chiralpak IC column;  $\lambda = 230$  nm; eluent: Hexane/Isopropanol = 95/5; Flow rate: 0.3 mL/min;  $t_{\text{minor}} = 33.33$  min,  $t_{\text{major}} = 31.09$  min; ee% = 94.

Sample Name: yyl-10-38rac ic 99. che

Date: 2010-05-18

Time: 11:08

Method:

column: ZC

the mobile phase: 99/1

Velocity: 99/1 0.7

the detection wavelength: 230

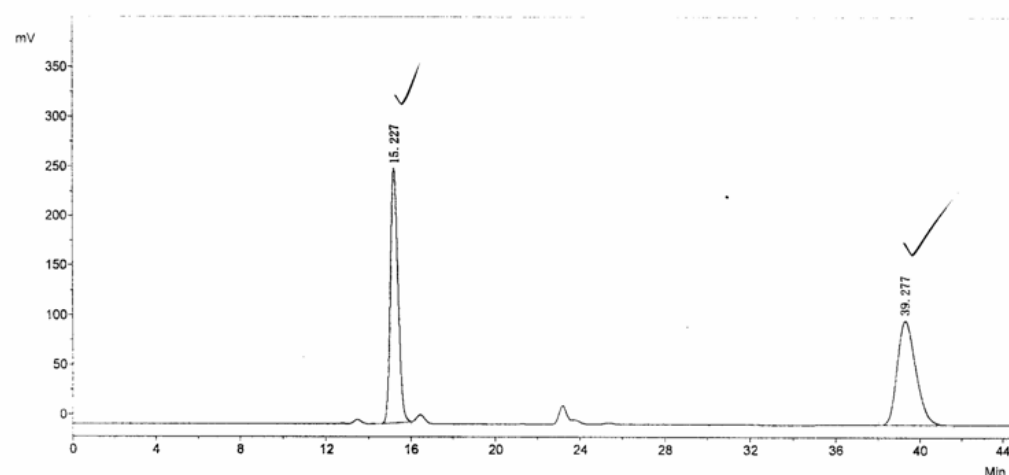

| No.   | PeakNo | R. Time | PeakHeight | PeakArea   | PerCent  |
|-------|--------|---------|------------|------------|----------|
| 1     | 1      | 15.227  | 254851.7   | 6365826.9  | 49.7065  |
| 2     | 2      | 39.277  | 104389.1   | 6441009.6  | 50.2935  |
| Total |        |         | 359240.8   | 12806836.5 | 100.0000 |

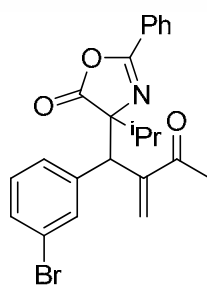

Chiral HPLC report: racemate (*syn-3f*)

## HPLC REPORT

Sample Name: yyl-10-22. che

Time: 10:06

column:

Velocity:

Date: 2010-05-18

Method:

the mobile phase:

the detection wavelength:

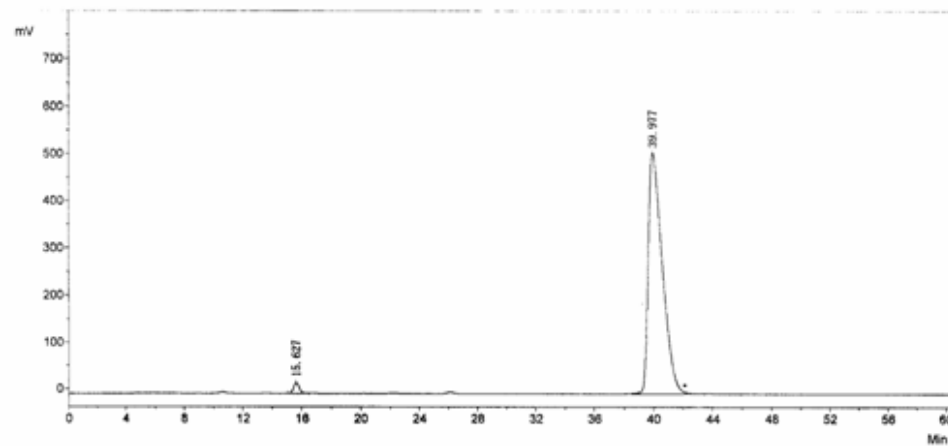

| No.   | PeakNo | R. Time | PeakHeight | PeakArea   | PerCent  |
|-------|--------|---------|------------|------------|----------|
| 1     | 1      | 15.627  | 22523.8    | 589098.7   | 1.7000   |
| 2     | 2      | 39.977  | 511550.0   | 34063365.0 | 98.3000  |
| Total |        |         | 534073.8   | 34652463.7 | 100.0000 |

Chiral HPLC report: Enantiomeric excess was determined by HPLC with a Chiralpak IC column;  $\lambda = 230$  nm; eluent: Hexane/Isopropanol = 99/1; Flow rate: 0.7 mL/min;  $t_{\text{minor}} = 39.97$  min,  $t_{\text{major}} = 15.63$  min; ee% = 97.

### HPLC REPORT

Sample Name: yyl-10-37rac ad250 95. che

Date: 2010-05-17

Time: 15:39

Method:

column: AD-H(C18)  
a7

the mobile phase: 85/15  
the detection wavelength: 230

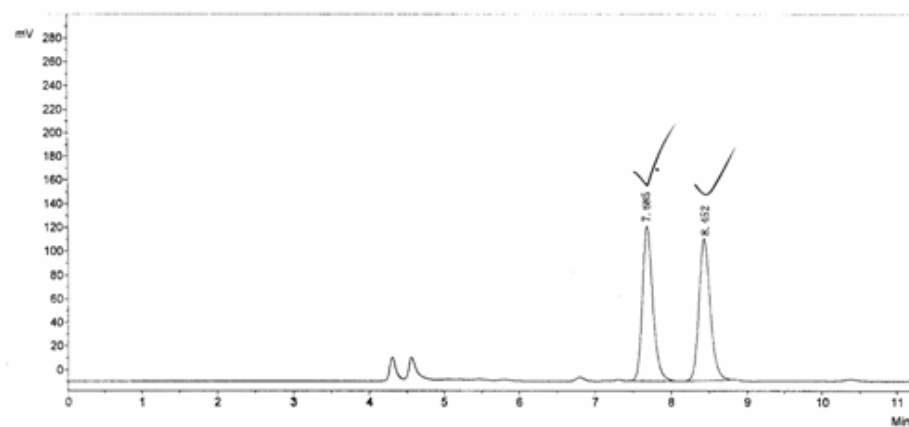

| No.   | PeakNo | R. Time | PeakHeight | PeakArea  | PerCent  |
|-------|--------|---------|------------|-----------|----------|
| 1     | 1      | 7.685   | 129752.3   | 1256826.3 | 50.3942  |
| 2     | 2      | 8.452   | 117985.8   | 1237164.5 | 49.6058  |
| Total |        |         | 247738.1   | 2493990.8 | 100.0000 |

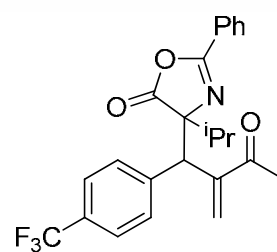

Chiral HPLC report: racemate (*syn*-**3g**)

## HPLC REPORT

Sample Name:yy1-10-23.che Date:2010-05-17  
Time:16:40 Method:  
column: the mobile phase:  
Velocity: the detection wavelength:

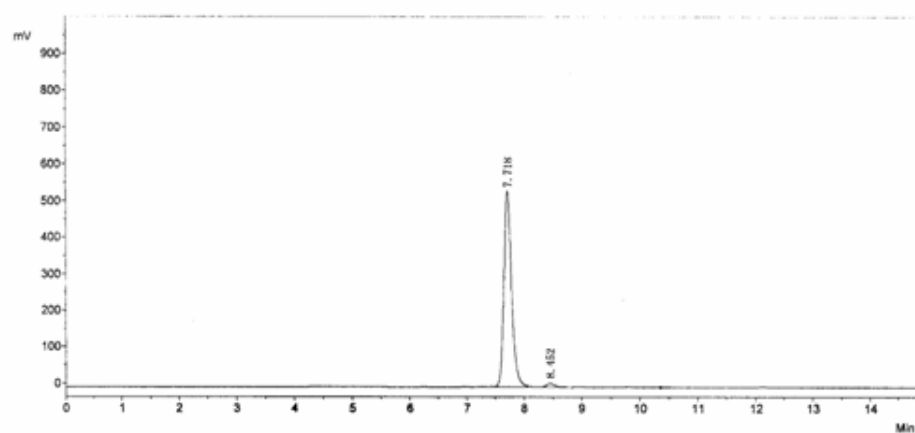

| No.   | PeakNo | R. Time | PeakHeight | PeakArea  | PerCent  |
|-------|--------|---------|------------|-----------|----------|
| 1     | 1      | 7.718   | 531329.9   | 5005319.2 | 98.1378  |
| 2     | 2      | 8.452   | 9374.6     | 94979.6   | 1.8622   |
| Total |        |         | 540704.6   | 5100298.8 | 100.0000 |

Chiral HPLC report: Enantiomeric excess was determined by HPLC with a Chiralpak AD column;  $\lambda = 230$  nm; eluent: Hexane/Isopropanol = 95/5; Flow rate: 0.7 mL/min;  $t_{\text{minor}} = 8.45$  min,  $t_{\text{major}} = 7.72$  min; ee% = 96.

### HPLC REPORT

Sample Name: yyl-10-41  
Column: AD-H  
Velocity (mL/min): 0.7

Date: #####  
Mobile Phase: hex/ipr = 90/10  
Detection Wavelength (nm): 230

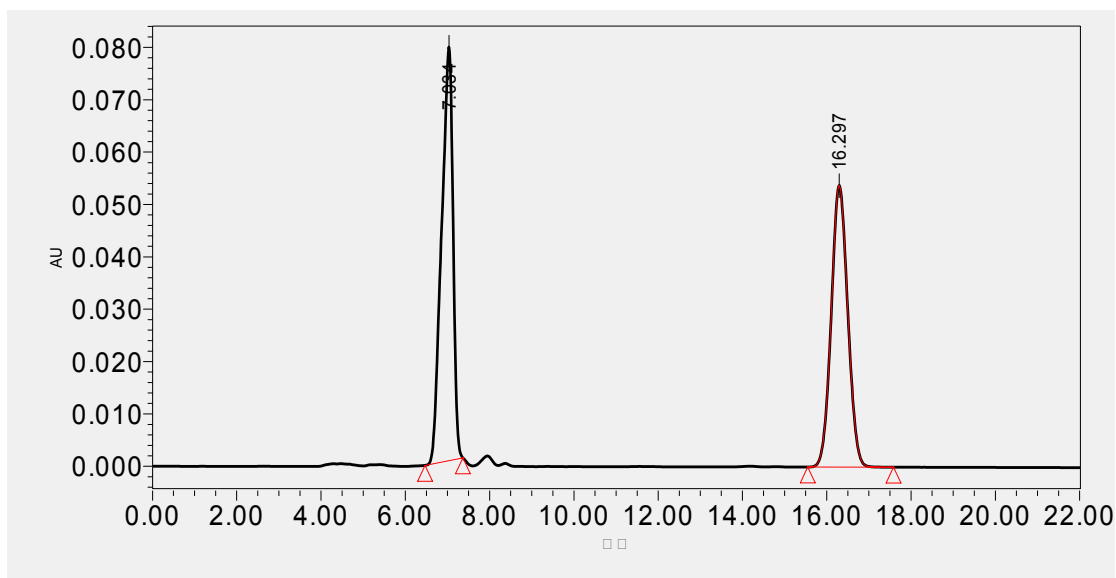

| NO | R. Time | Peak Area | Percent | Peak Height |
|----|---------|-----------|---------|-------------|
| 1  | 7.034   | 1484249   | 50.30   | 78970       |
| 2  | 16.297  | 1466305   | 49.70   | 53796       |

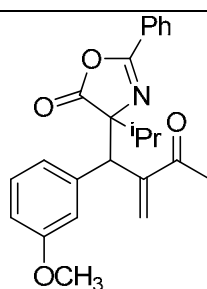

Chiral HPLC report: racemate (*syn-3h*)

### HPLC REPORT

Sample Name: yyl-10-43  
Column: AD-H  
Velocity (mL/min): 0.7

Date: #####  
Mobile Phase: hex/ipr = 90/10  
Detection Wavelength (nm): 230

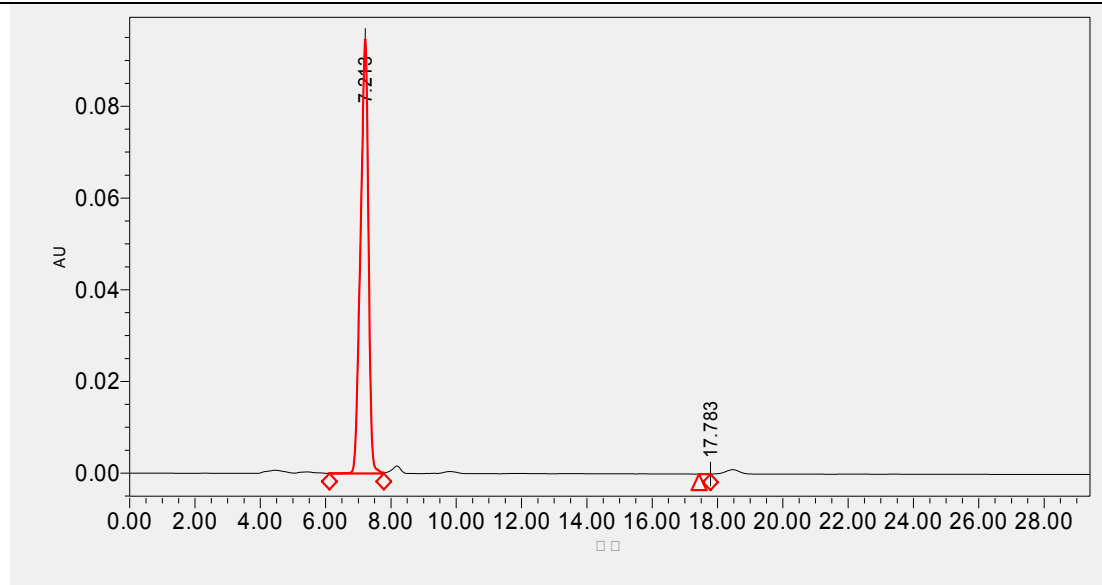

| NO | R. Time | Peak Area | Percent | Peak Height |
|----|---------|-----------|---------|-------------|
| 1  | 7.213   | 1591978   | 99.99   | 94766       |
| 2  | 17.783  | 220       | 0.01    | 20          |

Chiral HPLC report: Enantiomeric excess was determined by HPLC with a Chiralpak AD column;  $\lambda = 230$  nm; eluent: Hexane/Isopropanol = 90/10; Flow rate: 0.7 mL/min;  $t_{\text{minor}} = 17.78$  min,  $t_{\text{major}} = 7.21$  min; ee% = >99.



### HPLC REPORT

Sample Name: yyl-10-40  
Column: AD-H  
Velocity (mL/min): 0.7

Date: #####  
Mobile Phase: hex/ipr = 90/10  
Detection Wavelength (nm): 230

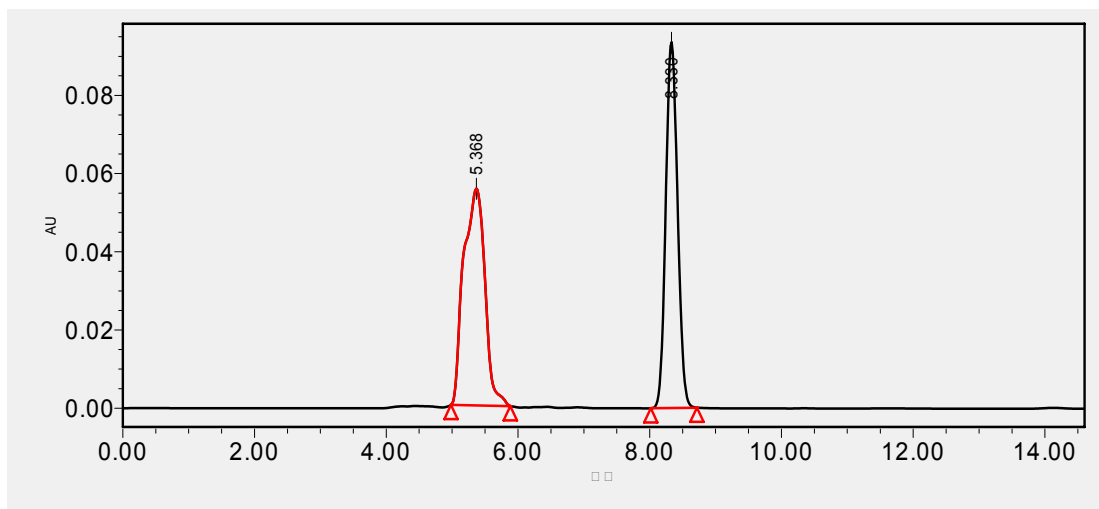

| NO | R. Time | Peak Area | Percent | Peak Height |
|----|---------|-----------|---------|-------------|
| 1  | 5.368   | 1244917   | 51.64   | 55442       |
| 2  | 8.330   | 1165709   | 48.36   | 93601       |

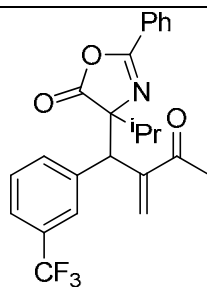

Chiral HPLC report: racemate (*syn-3i*)

### HPLC REPORT

Sample Name: yyl-10-42  
Column: AD-H  
Velocity (mL/min): 0.7

Date: #####  
Mobile Phase: hex/ipr = 90/10  
Detection Wavelength (nm): 230

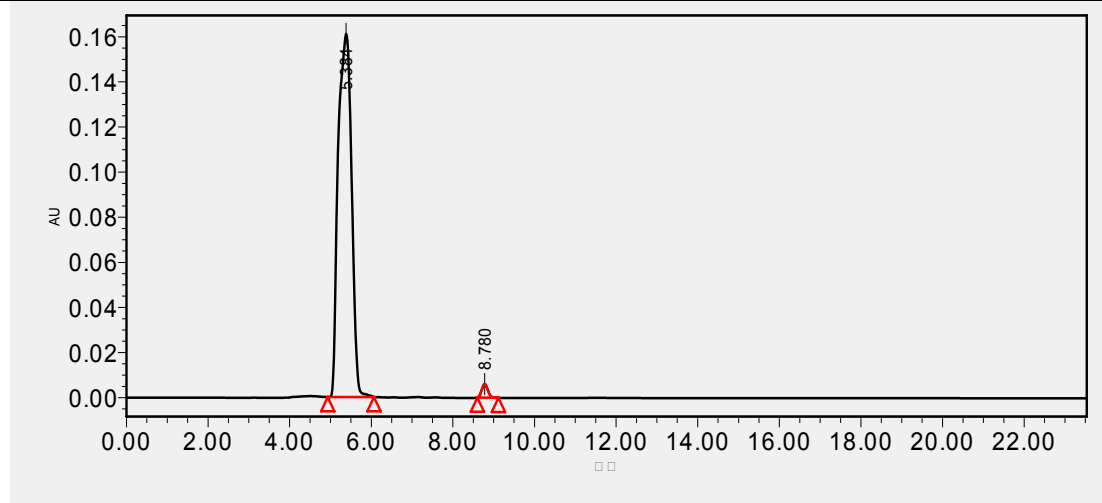

| NO | R. Time | Peak Area | Percent | Peak Height |
|----|---------|-----------|---------|-------------|
| 1  | 5.384   | 3673036   | 98.34   | 161115      |
| 2  | 8.780   | 62086     | 1.66    | 6066        |

Chiral HPLC report: Enantiomeric excess was determined by HPLC with a Chiralpak AD column;  $\lambda = 230$  nm; eluent: Hexane/Isopropanol = 90/10; Flow rate: 0.7 mL/min;  $t_{\text{minor}} = 8.78$  min,  $t_{\text{major}} = 5.38$  min; ee% = 97.

### HPLC REPORT

Sample Name: yyl-10-48  
Column: AD-H  
Velocity (mL/min): 0.7

Date: #####  
Mobile Phase: hex/ipr= 90/10  
Detection Wavelength (nm): 230

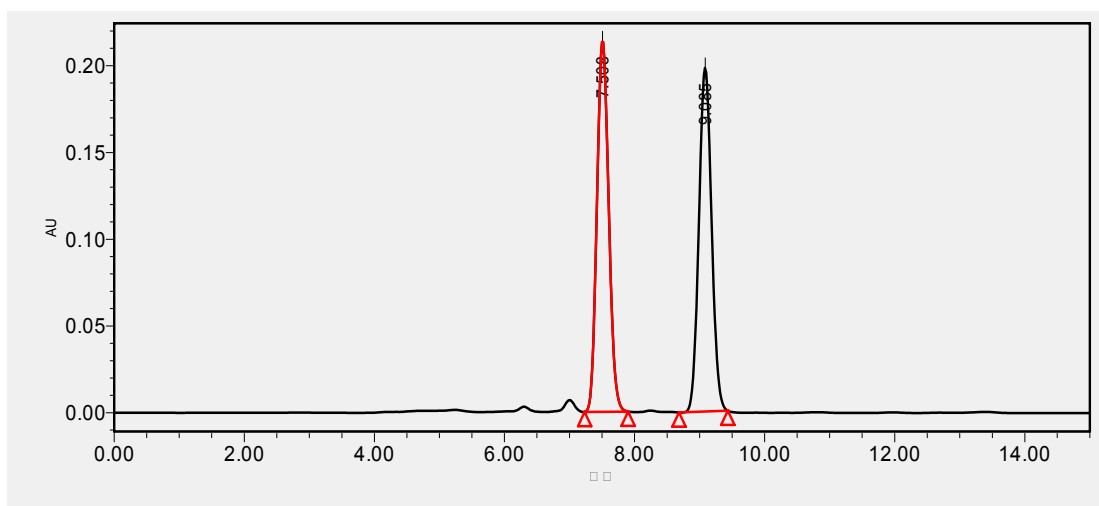

| NO | R. Time | Peak Area | Percent | Peak Height |
|----|---------|-----------|---------|-------------|
| 1  | 7.508   | 2694445   | 50.12   | 214074      |
| 2  | 9.085   | 2681332   | 49.88   | 197973      |

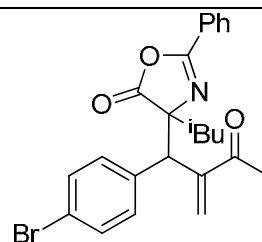

Chiral HPLC report: racemate (*syn-3j*)

### HPLC REPORT

Sample Name: yyl-10-49  
Column: AD-H  
Velocity (mL/min): 0.7

Date: #####  
Mobile Phase: hex/ipr = 90/10  
Detection Wavelength (nm): 230

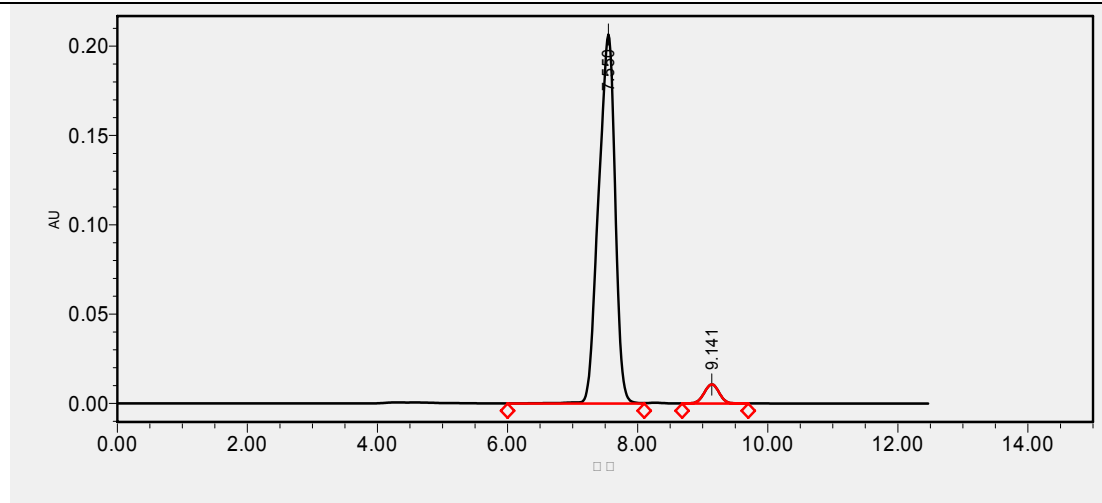

| NO | R. Time | Peak Area | Percent | Peak Height |
|----|---------|-----------|---------|-------------|
| 1  | 7.550   | 3654600   | 95.46   | 206594      |
| 2  | 9.141   | 173792    | 4.54    | 10746       |

Chiral HPLC report: Enantiomeric excess was determined by HPLC with a Chiralpak AD column;  $\lambda = 230$  nm; eluent: Hexane/Isopropanol = 90/10; Flow rate: 0.7 mL/min;  $t_{\text{minor}} = 9.14$  min,  $t_{\text{major}} = 7.55$  min; ee% = 91.

积分方法: 面积归一法

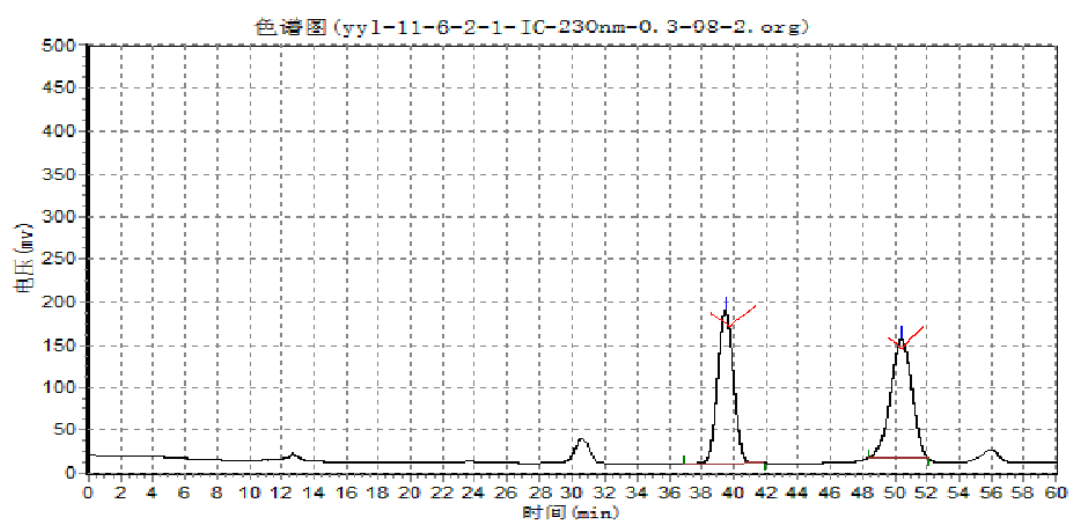

| 分析结果表 |    |        |            |              |          |
|-------|----|--------|------------|--------------|----------|
| 峰号    | 峰名 | 保留时间   | 峰高         | 峰面积          | 含量       |
| 1     |    | 39.468 | 178487.797 | 12183999.000 | 48.8318  |
| 2     |    | 50.423 | 138391.859 | 12766968.000 | 51.1682  |
| 总计    |    |        | 316879.656 | 24950967.000 | 100.0000 |

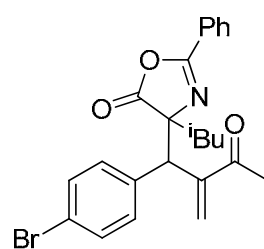

Chiral HPLC report: racemate (*anti*-**3j**)

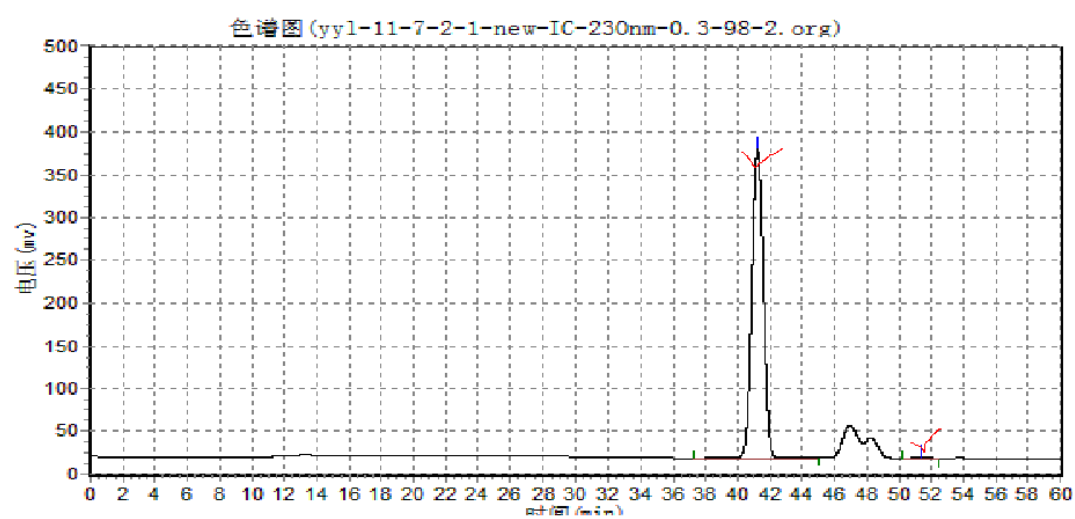

分析结果表

| 峰号 | 峰名 | 保留时间   | 峰高         | 峰面积          | 含量       |
|----|----|--------|------------|--------------|----------|
| 1  |    | 41.215 | 360279.219 | 18047374.000 | 99.1099  |
| 2  |    | 51.363 | 2385.264   | 162076.516   | 0.8901   |
| 总计 |    |        | 362664.482 | 18209450.516 | 100.0000 |

Chiral HPLC report: Enantiomeric excess was determined by HPLC with a Chiralpak IC column;  $\lambda = 230$  nm; eluent: Hexane/Isopropanol = 98/2; Flow rate: 0.3 mL/min;  $t_{\text{minor}} = 51.36$  min,  $t_{\text{major}} = 41.25$  min; ee% = 98.

### HPLC REPORT

Sample Name: yyl-10-50  
Column: AD-H  
Velocity (mL/min): 0.7

Date: #####  
Mobile Phase: hex/ipr = 90/10  
Detection Wavelength (nm): 230

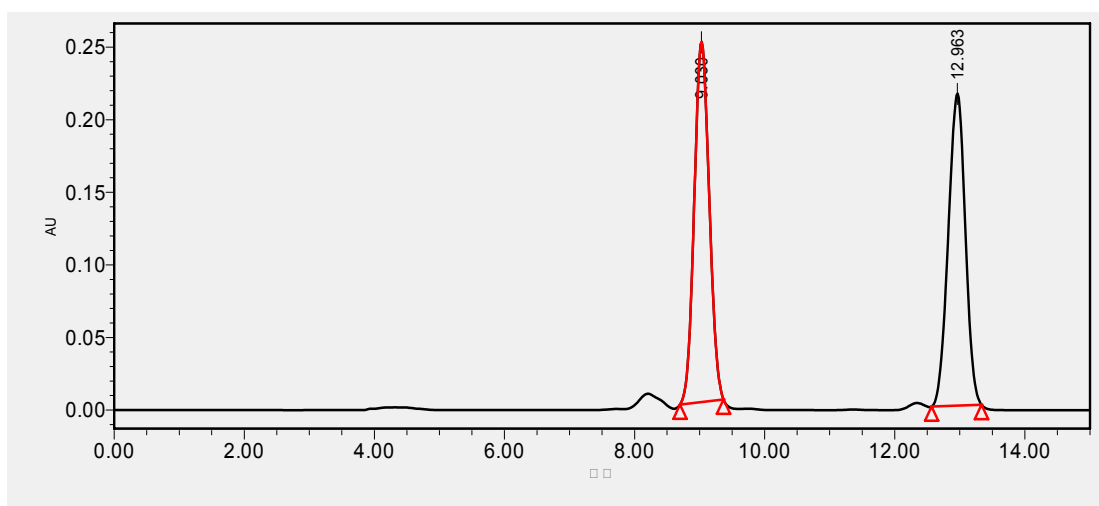

| NO | R. Time | Peak Area | Percent | Peak Height |
|----|---------|-----------|---------|-------------|
| 1  | 9.030   | 3982662   | 50.46   | 248157      |
| 2  | 12.963  | 3910095   | 49.54   | 215043      |

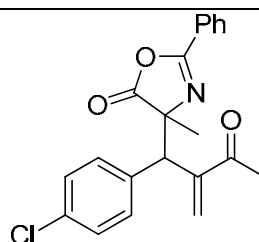

Chiral HPLC report: racemate (*syn-3k*)

### HPLC REPORT

Sample Name: yyl-10-51  
Column: AD-H  
Velocity (mL/min): 0.7

Date: #####  
Mobile Phase: hex/ipr = 90/10  
Detection Wavelength (nm): 230

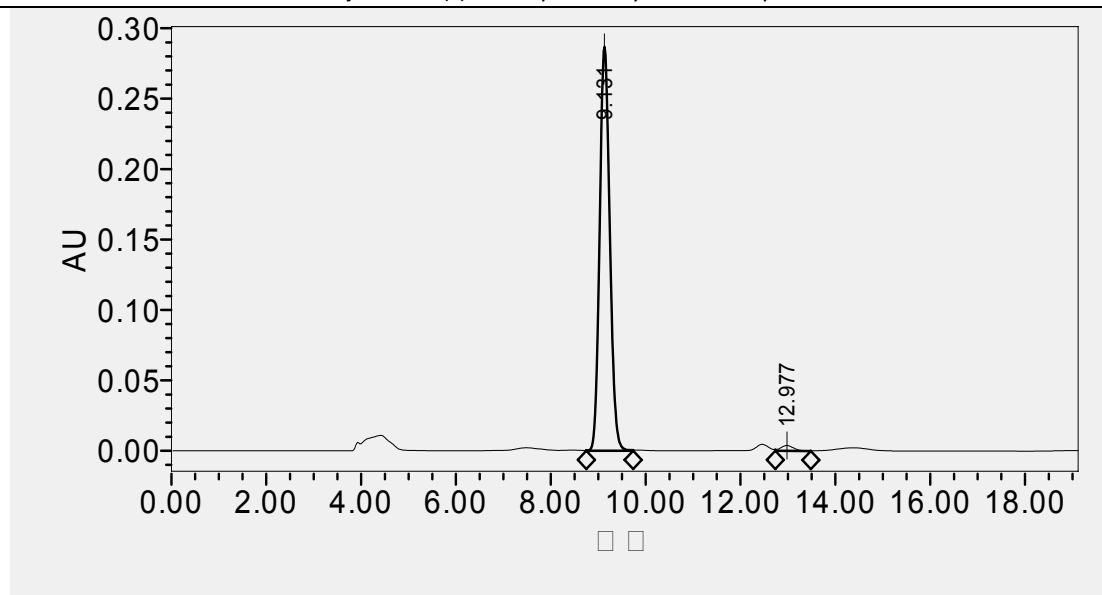

| NO | R. Time | Peak Area | Percent | Peak Height |
|----|---------|-----------|---------|-------------|
| 1  | 9.131   | 4267822   | 98.32   | 286796      |
| 2  | 12.977  | 72999     | 1.68    | 3811        |

Chiral HPLC report: Enantiomeric excess was determined by HPLC with a Chiralpak AD column;  $\lambda = 230$  nm; eluent: Hexane/Isopropanol = 90/10; Flow rate: 0.7 mL/min;  $t_{\text{minor}} = 12.97$  min,  $t_{\text{major}} = 9.13$  min; ee% = 97.



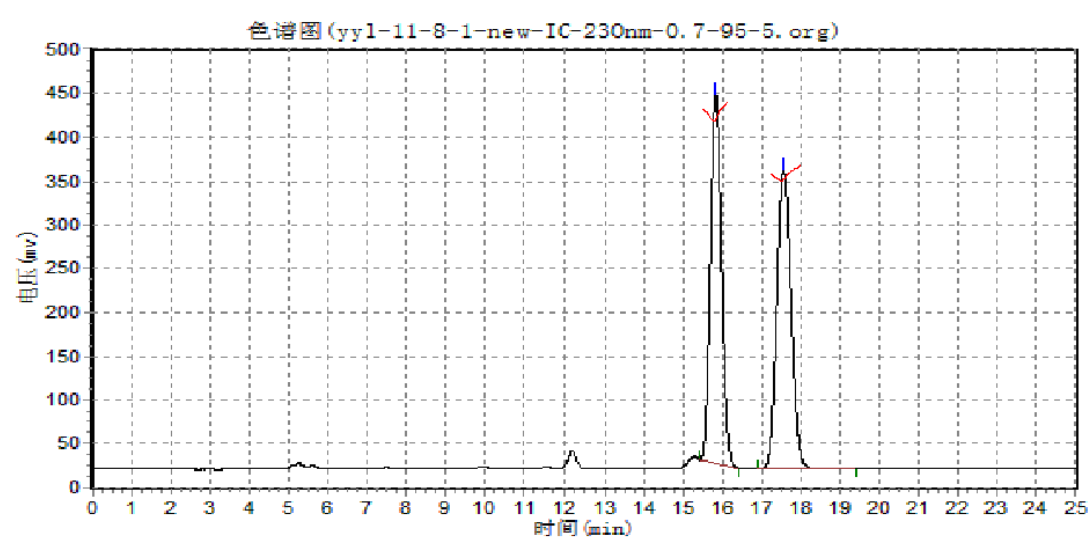

| 分析结果表 |    |        |            |              |          |
|-------|----|--------|------------|--------------|----------|
| 峰号    | 峰名 | 保留时间   | 峰高         | 峰面积          | 含量       |
| 1     |    | 15.837 | 419188.063 | 8306206.000  | 49.2016  |
| 2     |    | 17.567 | 341142.906 | 8575762.000  | 50.7984  |
| 总计    |    |        | 760330.969 | 16881968.000 | 100.0000 |

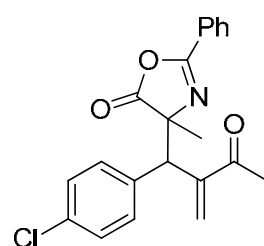

Chiral HPLC report: racemate (*anti*-**3k**)

数据工作站

010-07-18, 19:34:59  
\\HPLC\杨景梁\yy1-11-9-1-IC-230nm-0.7-95-5.org

实验者:  
报告时间: 2010-07-20, 19:53:08  
积分方法: 面积归一法

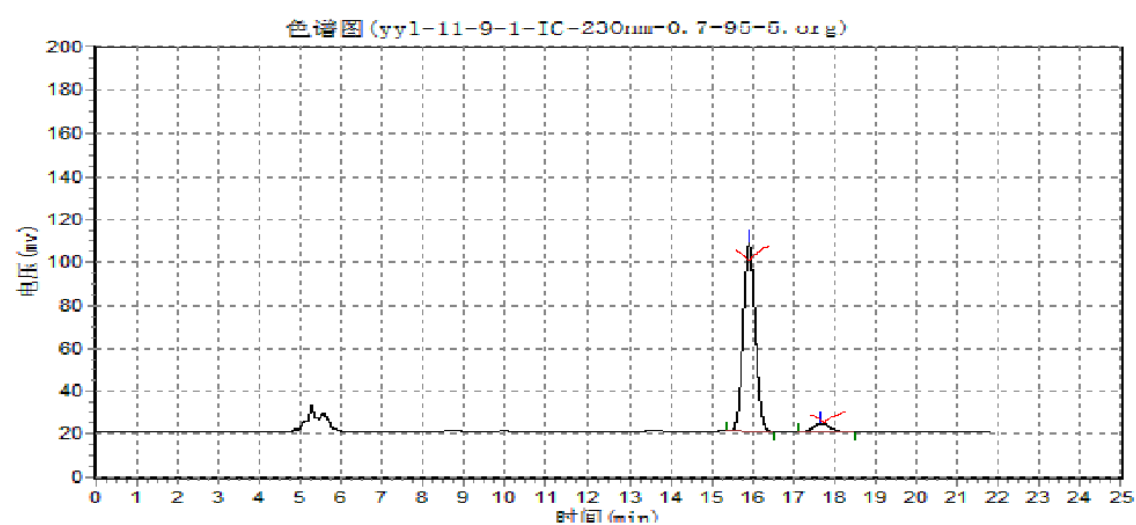

分析结果表

| 峰名 | 保留时间   | 峰高        | 峰面积         | 含量       |
|----|--------|-----------|-------------|----------|
|    | 15.917 | 87196.670 | 1784704.875 | 94.4651  |
|    | 17.680 | 3847.794  | 104568.766  | 5.5349   |
|    |        | 91044.365 | 1889273.641 | 100.0000 |

Chiral HPLC report: Enantiomeric excess was determined by HPLC with a Chiralpak IC column;  $\lambda = 230$  nm; eluent: Hexane/Isopropanol = 95/5; Flow rate: 0.7 mL/min;  $t_{\text{minor}} = 17.68$  min,  $t_{\text{major}} = 15.92$  min; ee% = 90.

### HPLC REPORT

Sample Name: yyl-10-52  
Column: AD-H  
Velocity (mL/min): 0.7

Date: #####  
Mobile Phase: hex/ipr = 90/10  
Detection Wavelength (nm): 230

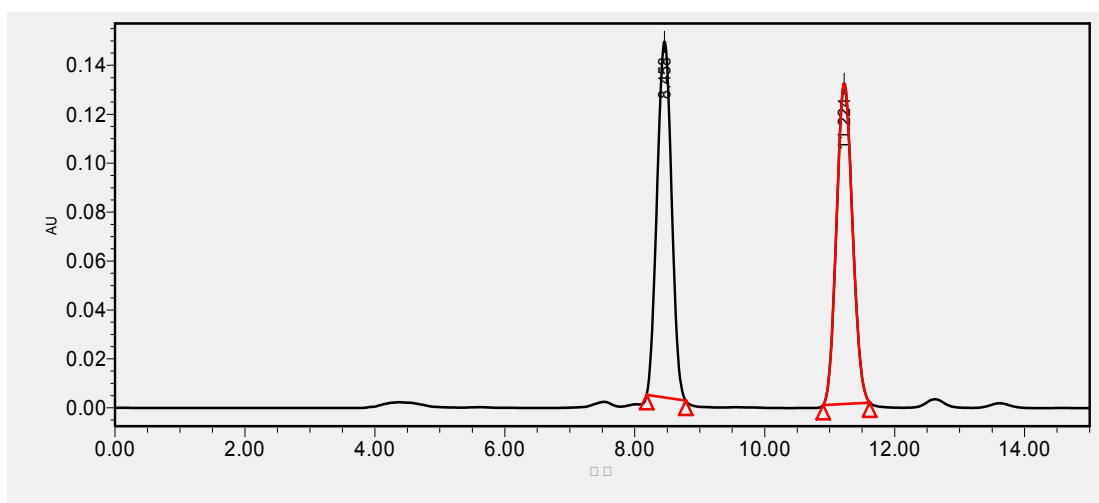

| NO | R. Time | Peak Area | Percent | Peak Height |
|----|---------|-----------|---------|-------------|
| 1  | 8.458   | 2257992   | 50.04   | 145742      |
| 2  | 11.224  | 2254124   | 49.96   | 131197      |

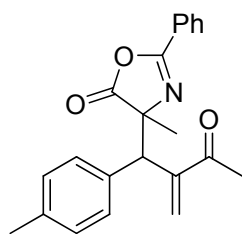

Chiral HPLC report: racemate (*syn-3I*)

### HPLC REPORT

Sample Name: yyl-10-53  
Column: AD-H  
Velocity (mL/min): 0.7

Date: #####  
Mobile Phase: hex/ipr = 90/10  
Detection Wavelength (nm): 230

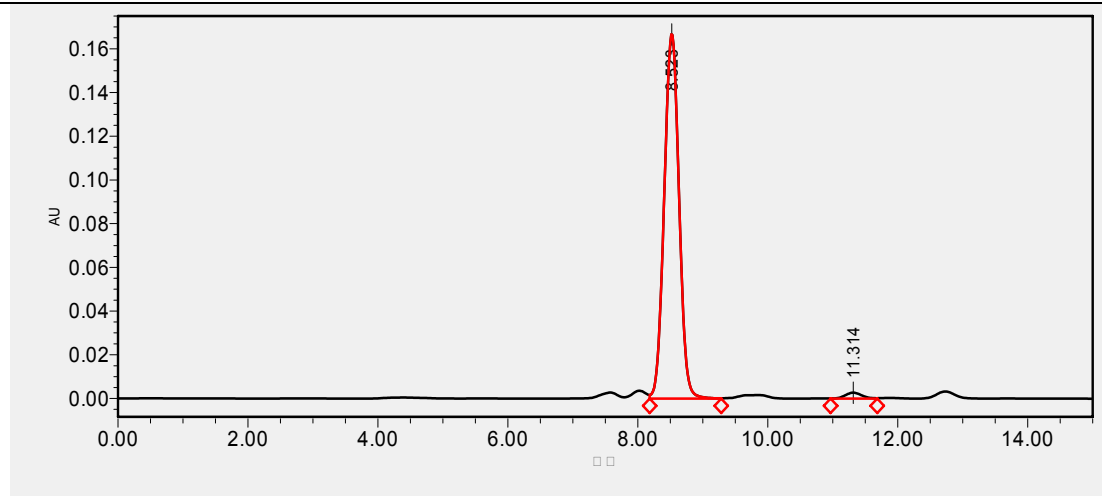

| NO | R. Time | Peak Area | Percent | Peak Height |
|----|---------|-----------|---------|-------------|
| 1  | 8.523   | 2650036   | 98.21   | 166994      |
| 2  | 11.314  | 48375     | 1.79    | 2730        |

Chiral HPLC report: Enantiomeric excess was determined by HPLC with a Chiralpak AD column;  $\lambda = 230$  nm; eluent: Hexane/Isopropanol = 90/10; Flow rate: 0.7 mL/min;  $t_{\text{minor}} = 11.31$  min,  $t_{\text{major}} = 8.52$  min; ee% = 96.

### HPLC REPORT

Sample Name: yyl-10-56  
Column: AD-H  
Velocity (mL/min): 0.7

Date: #####  
Mobile Phase: hex/ipr = 90/10  
Detection Wavelength (nm): 230

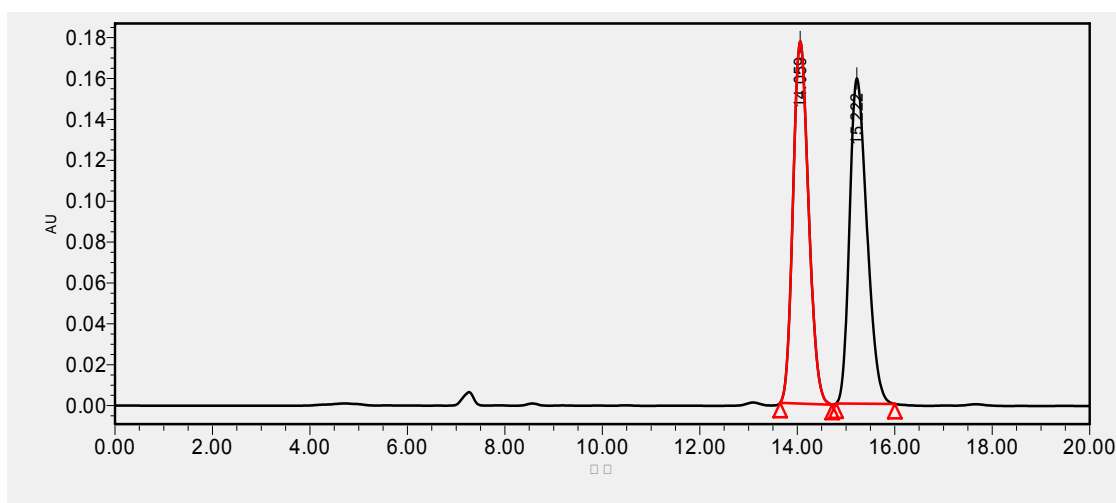

| NO | R. Time | Peak Area | Percent | Peak Height |
|----|---------|-----------|---------|-------------|
| 1  | 14.059  | 3922051   | 49.81   | 177148      |
| 2  | 15.222  | 3952340   | 50.19   | 159217      |

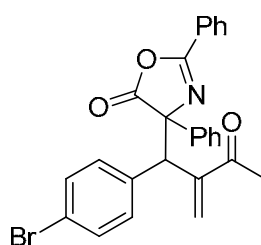

Chiral HPLC report: racemate (*syn-3m*)

### HPLC REPORT

Sample Name: yyl-11-1-1  
Column: AD-H  
Velocity (mL/min): 0.7

Date: #####  
Mobile Phase: hex/ipr = 90/10  
Detection Wavelength (nm): 230

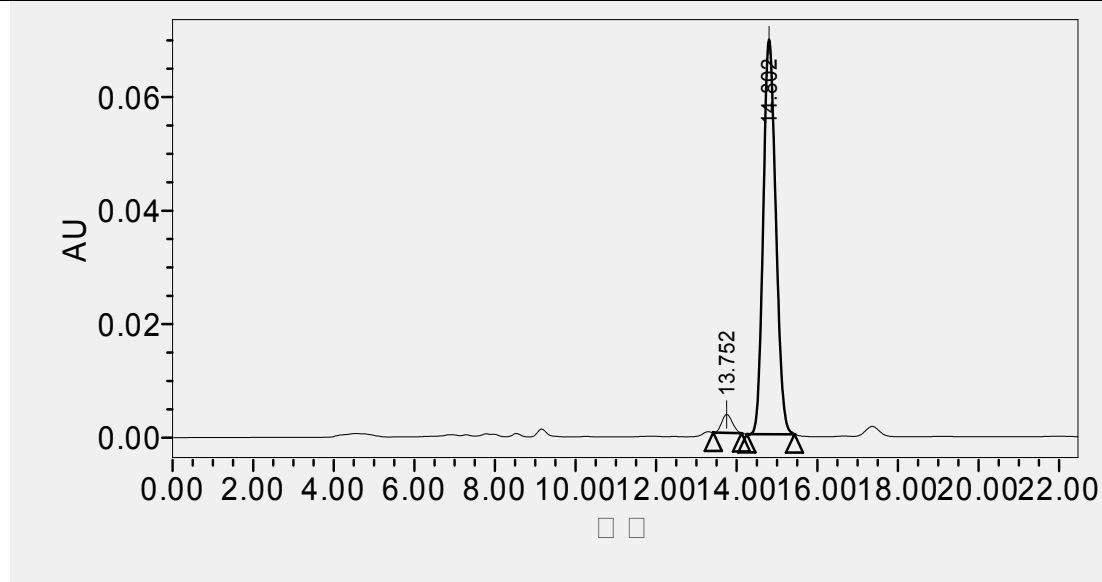

| NO | R. Time | Peak Area | Percent | Peak Height |
|----|---------|-----------|---------|-------------|
| 1  | 13.752  | 60016     | 3.83    | 3252        |
| 2  | 14.802  | 1505481   | 96.17   | 69496       |

Chiral HPLC report: Enantiomeric excess was determined by HPLC with a Chiralpak AD column;  $\lambda = 230$  nm; eluent: Hexane/Isopropanol = 90/10; Flow rate: 0.7 mL/min;  $t_{\text{minor}} = 13.75$  min,  $t_{\text{major}} = 14.80$  min; ee% = 92.

### HPLC REPORT

Sample Name: yyl-10-91  
Column: AD-H  
Velocity (mL/min): 0.7

Date:20100406  
Mobile Phase: hex/ipr = 90/10  
Detection Wavelength (nm): 230

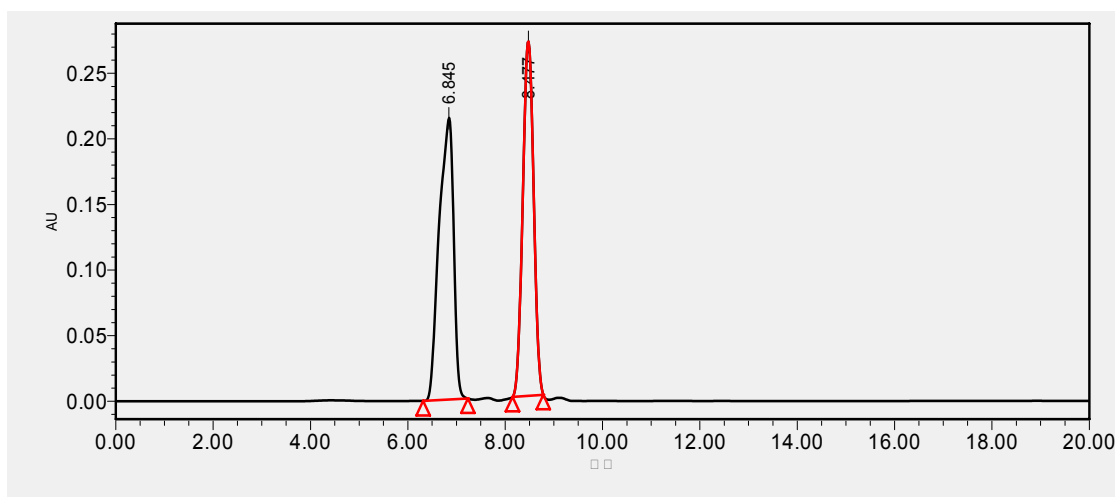

| NO | R. Time | Peak Area | Percent | Peak Height |
|----|---------|-----------|---------|-------------|
| 1  | 6.845   | 4411944   | 51.06   | 214922      |
| 2  | 8.477   | 4228739   | 48.94   | 270479      |

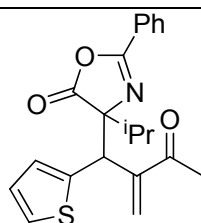

Chiral HPLC report: racemate (*syn-3n*)

### HPLC REPORT

Sample Name: yyl-10-92  
Column: AD-H  
Velocity (mL/min): 0.7

Date:20100406  
Mobile Phase: hex/ipr = 90/10  
Detection Wavelength (nm): 230

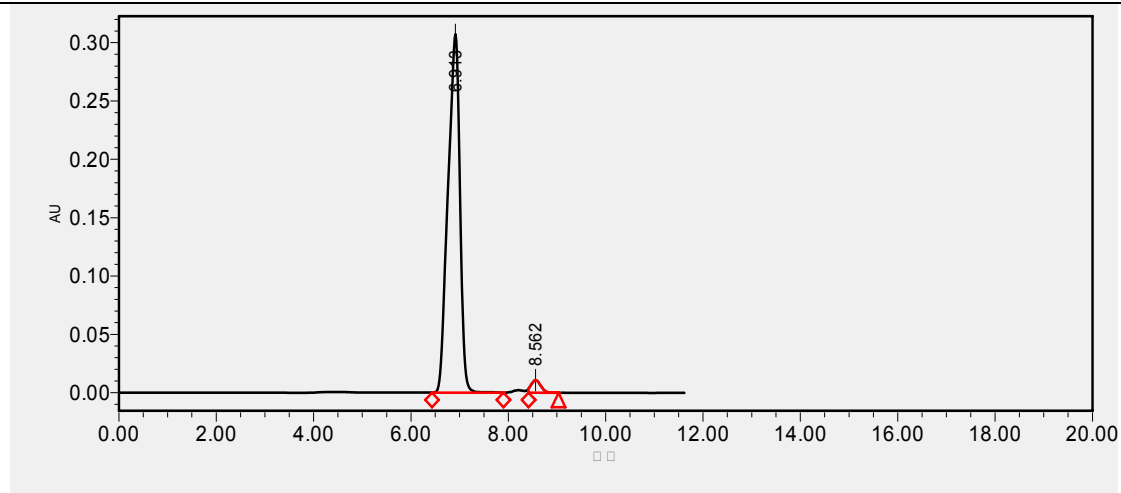

| NO | R. Time | Peak Area | Percent | Peak Height |
|----|---------|-----------|---------|-------------|
| 1  | 6.913   | 5259223   | 97.28   | 307423      |
| 2  | 8.562   | 147025    | 2.72    | 10728       |

Chiral HPLC report: Enantiomeric excess was determined by HPLC with a Chiralpak AD column;  $\lambda = 230$  nm; eluent: Hexane/Isopropanol = 90/10; Flow rate: 0.7 mL/min;  $t_{\text{minor}} = 8.56$  min,  $t_{\text{major}} = 6.91$  min; ee% = 95.



30, 15:20:01  
E:\数据\yy1-10-66-Ic-214nm-0.5-99-1.org

实验者:  
报告时间: 2010-07-20, 19:11:37  
积分方法: 面积归一法

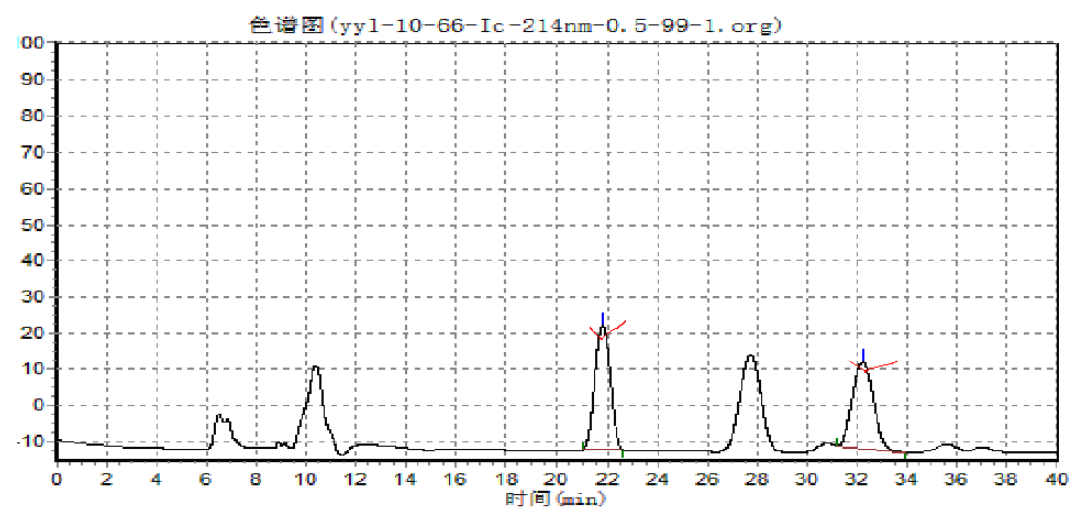

分析结果表

| 峰名 | 保留时间   | 峰高        | 峰面积         | 含量       |
|----|--------|-----------|-------------|----------|
|    | 21.792 | 34139.031 | 1463015.500 | 51.5792  |
|    | 32.230 | 23688.131 | 1373426.875 | 48.4208  |
|    |        | 57827.162 | 2836442.375 | 100.0000 |

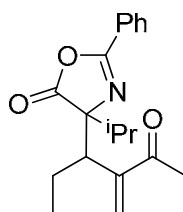

Chiral HPLC report: racemate (*syn-30*)

06-30, 18:28:46  
C:\杨袁梁\yy1-10-90-Ic-214nm-0.5-99-1.org  
实验者:  
检测时间: 2010-07-20, 19:22:11  
积分方法: 面积归一法

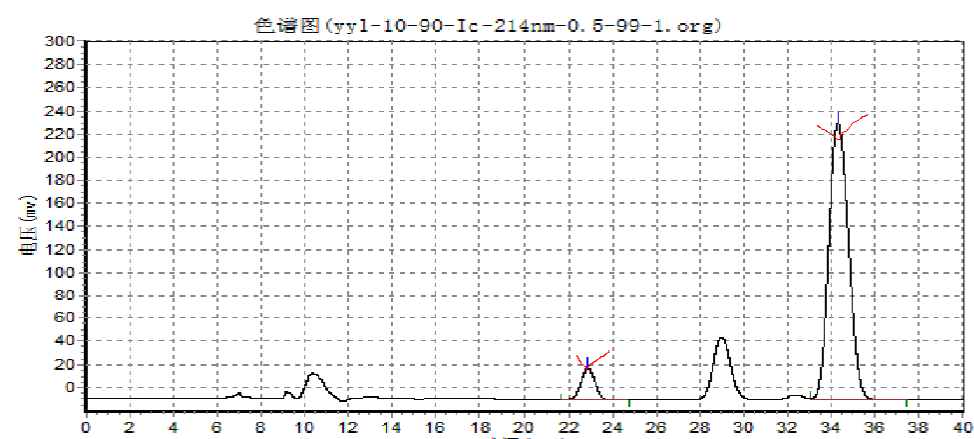

分析结果表

| 峰名 | 保留时间   | 峰高         | 峰面积          | 含量       |
|----|--------|------------|--------------|----------|
|    | 22.872 | 26916.619  | 1182396.625  | 7.2798   |
|    | 34.312 | 240724.297 | 16069856.000 | 92.7202  |
|    |        | 267640.916 | 16242252.625 | 100.0000 |

Chiral HPLC report: Enantiomeric excess was determined by HPLC with a Chiralpak IC column;  $\lambda = 214$  nm; eluent: Hexane/Isopropanol = 99/1; Flow rate: 0.5 mL/min;  $t_{\text{minor}} = 22.87$  min,  $t_{\text{major}} = 34.31$  min; ee% = 85%.

实验时间: 2010-06-19, 11:18:14  
 谱图文件: D:\HPLC\杨袁梁\yy1-10-62-1-AD-H-0.7-95-5-230nm.org  
 样品名称:  
 进样时间: 2011-01-05, 15:11:38  
 积分方法: 面积归一法

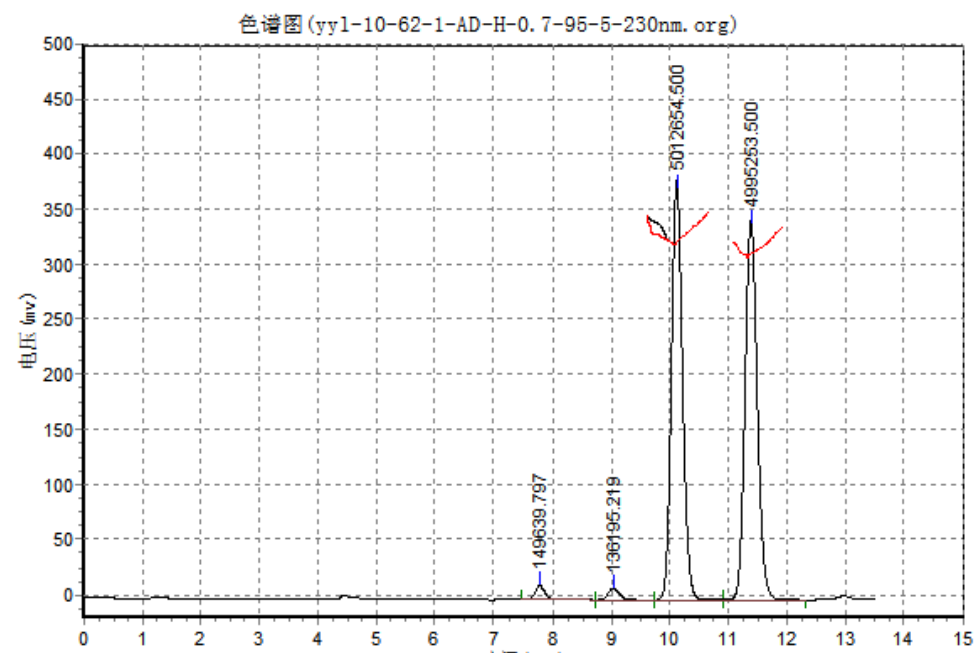

分析结果表

| 峰号 | 峰名 | 保留时间   | 峰高         | 峰面积          | 含量       |
|----|----|--------|------------|--------------|----------|
| 1  |    | 7.782  | 12622.818  | 149639.797   | 1.4537   |
| 2  |    | 9.048  | 10819.363  | 136195.219   | 1.3231   |
| 3  |    | 10.132 | 37768.219  | 5012654.500  | 48.6961  |
| 4  |    | 11.398 | 342439.125 | 4995253.500  | 48.5271  |
| 总计 |    |        | 743649.525 | 10293743.016 | 100.0000 |

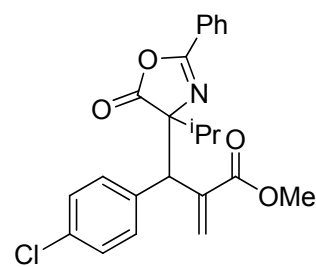

Chiral HPLC report: racemate (*syn*-**3p**)

实验时间: 2010-06-19, 11:04:06  
谱图文件: D:\HPLC\杨袁梁\yy1-10-69-1-AD-H-0.7-95-5-230nm.org  
实验者:  
报告时间: 2011-01-05, 15:20:27  
积分方法: 面积归一法

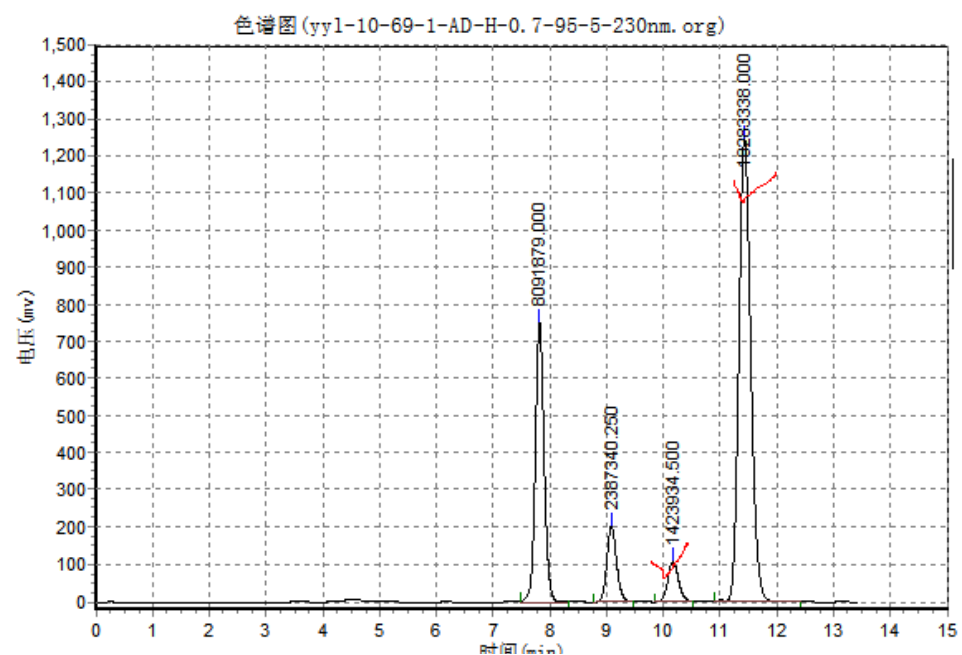

分析结果表

| 峰号 | 峰名 | 保留时间   | 峰高          | 峰面积          | 含量       |
|----|----|--------|-------------|--------------|----------|
| 1  |    | 7.805  | 755848.375  | 8091879.000  | 26.8063  |
| 2  |    | 9.077  | 201733.328  | 2387340.250  | 7.9086   |
| 3  |    | 10.167 | 108164.961  | 1423934.500  | 4.7171   |
| 4  |    | 11.428 | 1249386.750 | 1828338.000  | 60.5679  |
| 总计 |    |        | 2315133.414 | 30186491.750 | 100.0000 |

Chiral HPLC report: Enantiomeric excess was determined by HPLC with a Chiralpak AD column;  $\lambda = 230$  nm; eluent: Hexane/Isopropanol = 95/5; Flow rate: 0.7 mL/min;  $t_{\text{minor}} = 11.43$  min,  $t_{\text{major}} = 10.17$  min; ee% = 86%.

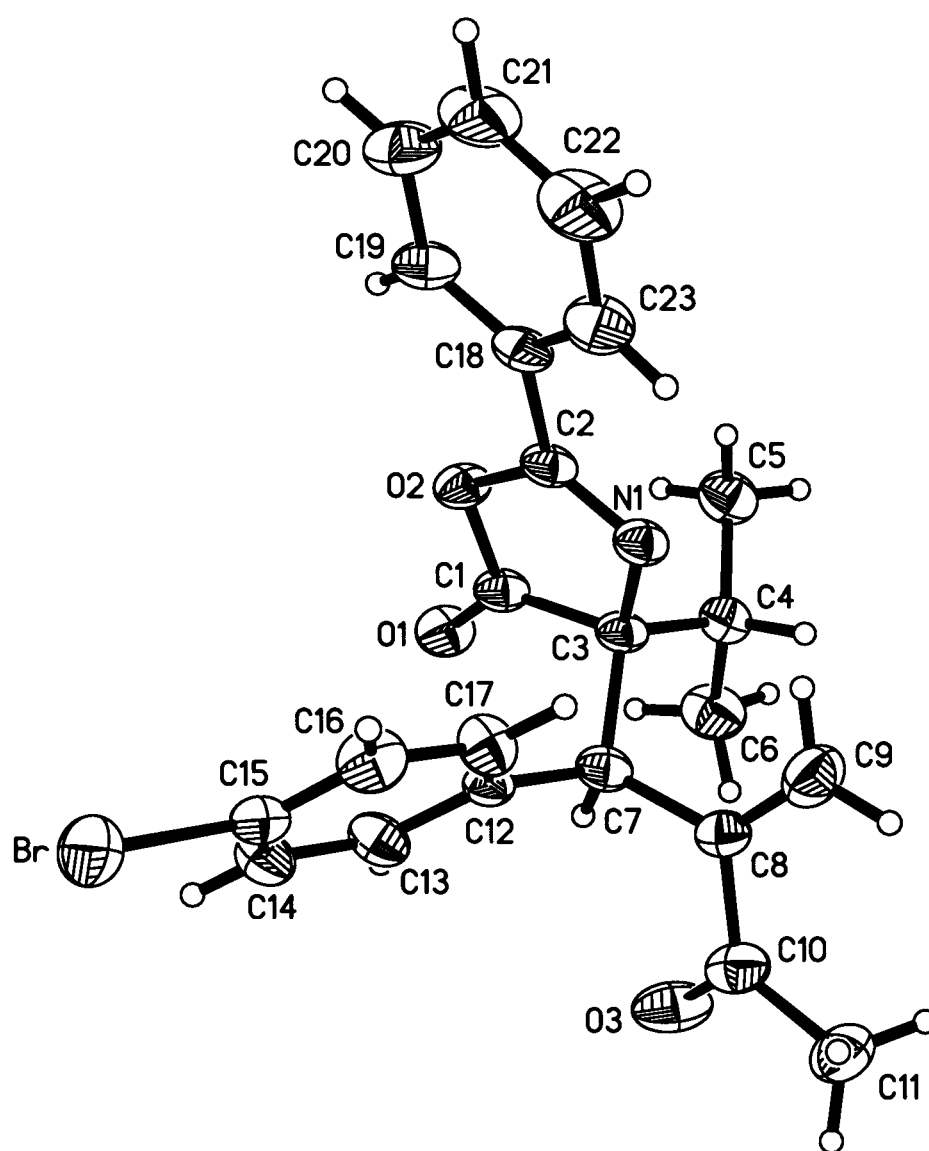

The crystal data of **3b** have been deposited in CCDC with number 779521. Empirical Formula:  $C_{23}H_{22}BrNO_3$ ; Formula Weight: 440.33; Crystal Color, Habit: colorless, prismatic; Crystal Dimensions: 0.398 x 0.325 x 0.280 mm; Crystal System: Orthorhombic; Lattice Parameters:  $a = 10.5465(15)\text{\AA}$ ,  $b = 13.646(2)\text{\AA}$ ,  $c = 14.694(2)\text{\AA}$ ,  $\alpha = 90^\circ$ ,  $\beta = 90^\circ$ ,  $\gamma = 90^\circ$ ,  $V = 2114.8(5)\text{\AA}^3$ ; Space group:  $P2(1)2(1)2(1)$ ;  $Z = 4$ ;  $D_{calc} = 1.383\text{ g/cm}^3$ ;  $F_{000} = 904$ ; Diffractometer: Rigaku AFC7R; Residuals:  $R; R_w: 0.0406, 0.0835$ .
